# Supplementary material for: Synthesis of fluorine-containing bicyclo[4.1.1]octenes via photocatalyzed defluorinative (4 + 3) annulation of bicyclo[1.1.0]butanes with gem-difluoroalkenes
Source: PubMed Central journal article supplement (PMC11659875; doi:10.1039/d4sc07243j), 2024-12-13

**Synthesis of fluorine-containing bicyclo[4.1.1]octenes via  
photocatalyzed defluorinative (4+3) annulation of  
bicyclo[1.1.0]butanes with *gem*-difluoroalkenes**

Kuan Zhang,<sup>[a]</sup> Zhengyang Gao,<sup>[a]</sup> Yan Xia,<sup>[a]</sup> Pengfei Li,<sup>[a, b]</sup> Pin Gao,<sup>[a]</sup> Xin-Hua Duan,<sup>[a]</sup> Li-Na Guo\*<sup>[a]</sup>

<sup>a</sup>Department of Chemistry, School of Chemistry, Xi'an Key Laboratory of Sustainable Energy Material Chemistry and Engineering Research Center of Energy Storage, Materials and Devices, Ministry of Education, Xi'an Jiaotong University, Xi'an 710049, China

<sup>b</sup>Frontier Institute of Science and Technology and State Key Laboratory for Mechanical Behavior of Materials, Xi'an Jiaotong University, Xi'an 710049, China

Email: guoln81@xjtu.edu.cn

## Table of Contents

|                                                                                                              |     |
|--------------------------------------------------------------------------------------------------------------|-----|
| 1. General Information .....                                                                                 | S3  |
| 2. The Light Source and the Material of the Irradiation Vessel .....                                         | S4  |
| 3. Starting Materials .....                                                                                  | S5  |
| 3.1 Preparation of BCBs ( <b>1n</b> , <b>1r</b> ) .....                                                      | S5  |
| 3.2 Preparation of <i>gem</i> -Difluoroalkenes ( <b>2b-2r</b> and <b>2t</b> ).....                           | S8  |
| 4. Detailed Optimization of Reaction Conditions .....                                                        | S11 |
| 5. Representative Procedure for the Reaction of BCBs <b>1</b> and <i>gem</i> -Difluoroalkenes <b>2</b> ..... | S17 |
| 6. Scale-Up Synthesis.....                                                                                   | S17 |
| 7. Derivatizations of Products .....                                                                         | S18 |
| 7.1 Synthesis of the Compound <b>4aa</b> <sup>7</sup> .....                                                  | S18 |
| 7.2 Synthesis of the Compound <b>5aa</b> <sup>8</sup> .....                                                  | S18 |
| 7.3 Synthesis of the Compound <b>6ka</b> and <b>6ka'</b> <sup>9</sup> .....                                  | S19 |
| 7.4 Synthesis of the Compound <b>7la</b> <sup>10</sup> .....                                                 | S19 |
| 7.5 Synthesis of the Compound <b>8la</b> <sup>11</sup> .....                                                 | S19 |
| 7.6 Synthesis of the Compound <b>9la</b> <sup>12</sup> .....                                                 | S20 |
| 7.7 Synthesis of the Compound <b>10la</b> <sup>12</sup> .....                                                | S20 |
| 8 Mechanistic Investigation.....                                                                             | S22 |
| 8.1 TEMPO-Trapping Experiment .....                                                                          | S22 |
| 8.2 Stern-Volmer Fluorescence Quenching Experiments .....                                                    | S23 |
| 8.3 Light On-Off Experiments .....                                                                           | S25 |
| 8.4 Cyclic voltammetry (CV) measurements .....                                                               | S26 |
| 9 Characterization Data of Products.....                                                                     | S28 |
| 10 Single-crystal X-ray diffraction data for <b>3aa</b> and <b>5aa</b> .....                                 | S45 |
| 11 References .....                                                                                          | S48 |
| 12 <sup>1</sup> H NMR, <sup>19</sup> F NMR and <sup>13</sup> C NMR Spectra of Products .....                 | S49 |

## 1. General Information

Unless otherwise noted, all reactions were carried out under nitrogen atmosphere, reagents and solvents were obtained from commercial suppliers and were used without further purification. Analytical TLC: aluminum backed plates pre-coated (0.25 mm) with Merck Silica Gel 60F-254. Column chromatography purifications were carried out using 200-300 mesh silica gel. Melting points were measured using open glass capillaries in a SGW® X-4A apparatus. <sup>1</sup>H NMR spectra were recorded on a JNM-ECZ400S/L1 400 MHz spectrometer at ambient temperature. <sup>13</sup>C NMR spectra were recorded on a JNM-ECZ400S/L1 100 MHz spectrometer at ambient temperature. <sup>19</sup>F NMR spectra were recorded on a JNM-ECZ400S/L1 376 MHz spectrometer at ambient temperature. Coupling constants are reported in Hz with multiplicities denoted as s (singlet), d (doublet), t (triplet), q (quartet), dd (doublet of doublets), td (triplet of doublets), m (multiplet) and br (broad). Infrared spectra were recorded on a Bruker V 70 and only major peaks were reported in cm<sup>-1</sup>. HRMS were obtained on a WATERS I-Class VION IMS Q-ToF with an ESI source. Some compounds were visualized by exposure to UV-light or by dipping the plates in KMnO<sub>4</sub> stain followed by heating. X-ray data were taken on a Bruker D8 VENTURE X-Ray diffractometer.

## 2. The Light Source and the Material of the Irradiation Vessel

Light Source purchased from XuSheng Electronic Technology.

Broadband source:  $\lambda = 455\text{-}460\text{ nm}$

Spectral distribution and intensity:

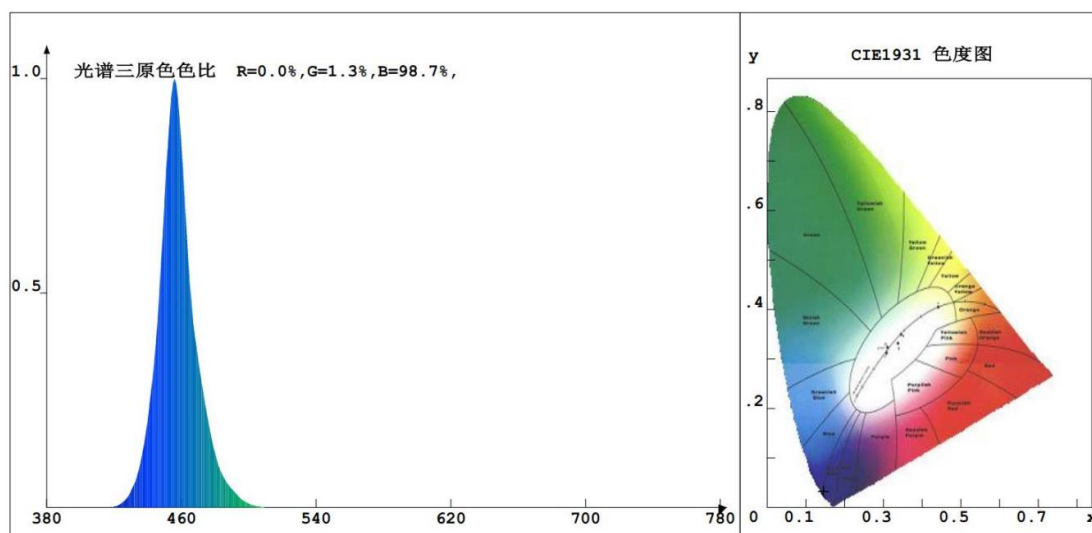

Material of the irradiation vessel: borosilicate reaction tube

Distance from the light source to the irradiation vessel: 3.0 cm

Not use any filters

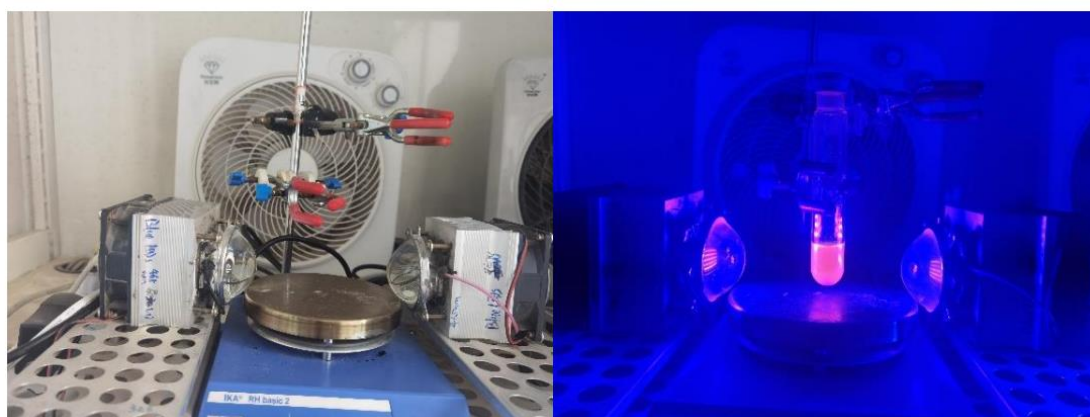

The setting-up reactions.

### 3. Starting Materials

The bicyclobutanes **1** and *gem*-difluoroalkenes **2** were prepared according to the literature. The NMR spectra of the known compounds were in full accordance with the data in the literatures.

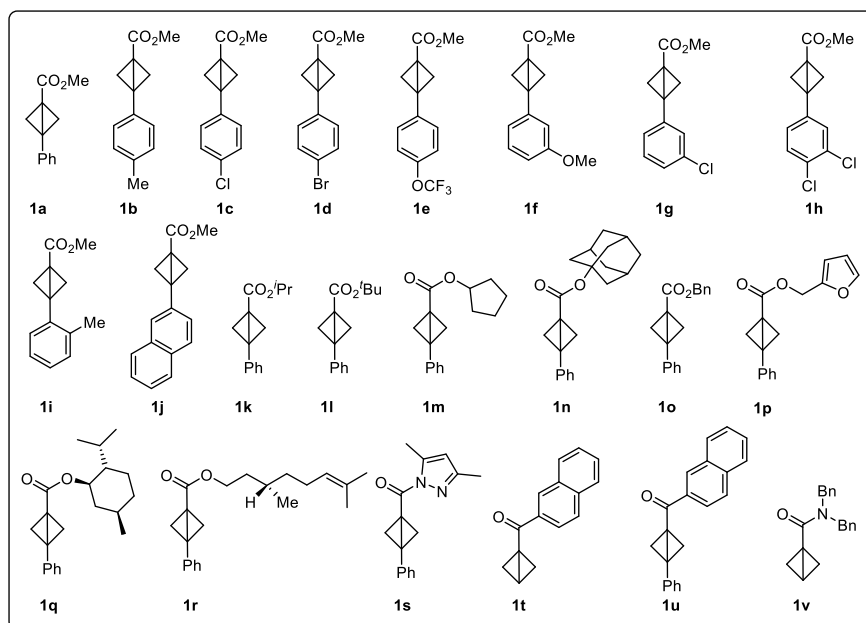

Except for **1n** and **1r**, the above bicyclo[1.1.0]butanes **1a-1m**,<sup>1</sup> **1o-1v**<sup>1,2</sup> are known and were prepared according to corresponding literature.

#### 3.1 Preparation of BCBs (**1n**, **1r**)

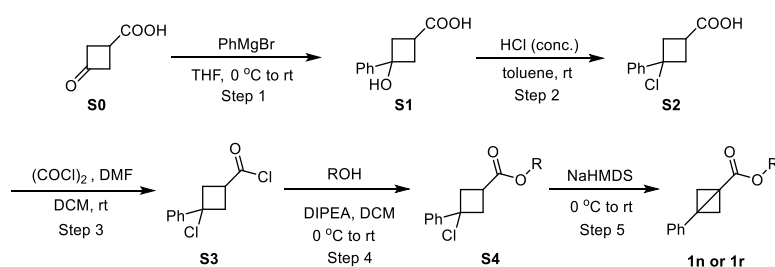

##### Step 1 (synthesis of S1)

An oven-dried 500 mL round bottom flask equipped with a stir bar was cooled under vacuum. After backfilled with N<sub>2</sub> (3 times) and capped with a septum, 3-oxocyclobutanecarboxylic acid (5.7 g, 50 mmol, 1.00 equiv) and THF (100 mL) were added. The reaction was cooled to 0 °C in an ice/water bath and PhMgBr (110 mL, 1.0 M in THF, 110 mmol, 2.2 equiv) was added to the solution by a syringe. The ice/water bath was then removed and the reaction was stirred at room temperature for 12 h before quenched with saturated NH<sub>4</sub>Cl solution (50 mL). The aqueous layer was extracted with EtOAc (3 x 50 mL). The combined organic layers were washed with brine (100

mL), dried over anhydrous MgSO<sub>4</sub>, filtered and concentrated by rotary evaporation. The crude acid was directly used in next reaction without further purification.

### **Step 2 (synthesis of S2)**

A 500 mL round bottom flask equipped with a magnetic stir bar was charged with above crude acid **S1** (assuming 50 mmol, 1.0 equiv), concentrated HCl solution (50 mL) and PhMe (60 mL). The flask was capped with a septum. The reaction was vigorously stirred at room temperature for 12 h. The aqueous layer was extracted with Et<sub>2</sub>O (3 x 50 mL). The combined organic layers were washed with brine (100 mL), dried over anhydrous MgSO<sub>4</sub>, filtered and concentrated by rotary evaporation. The crude acid was directly used in next reaction without further purification.

### **Step 3 (synthesis of S3)**

3-Chloro-3-phenylcyclobutane-1-carboxylic acid **S2** (2.98 g, 15.5 mmol) was added to a 100 mL round bottom flask and dissolved in 20 mL of DCM. A drop of DMF was added to the reaction mixture. Oxalyl chloride (3.5 mL, 38.8 mmol) dissolved in 5 mL DCM was added dropwise over a period of 20 min at room temperature. The reaction mixture was stirred for 24 h. The solvent was removed by vacuum filtration and a brown oil was obtained as a mixture of diastereomers (2.5 g, 70%). The product was used in the next step without further purification.

### **Step 4 (synthesis of S4)**

A solution of alcohol (1.2 equiv) and DIPEA (1.0 equiv) in DCM was added to a vial, and then was cooled to 0 °C. 3-Chloro-3-phenylcyclobutane-1-carbonyl chloride **S3** (1.0 equiv) dissolved in DCM was added dropwise to the vial. The reaction mixture was then warmed to room temperature and stirred for 2 h. The reaction mixture was washed with water and then the solvent was removed under vacuum to give the crude product. The compound was purified by column chromatography.

### **Step 5 (synthesis of 1n or 1r)**

A solution of 3-chloro-3-aryl-cyclobutane ester **S4** (1.0 equiv) in THF was added to a vial under a nitrogen atmosphere. NaHMDS (1.0 equiv) was added to the vial and the reaction mixture was stirred at 0 °C for 0.5 h. The mixture was warmed to room temperature and stirred for 1.5 h before quenched with saturated NH<sub>4</sub>Cl solution. The aqueous layer was extracted with EtOAc, The combined organic layers were washed with brine, dried over anhydrous MgSO<sub>4</sub>, filtered and concentrated by rotary evaporation, the residue was purified by column chromatography to afford

desired products.

### Characterization of Starting Materials

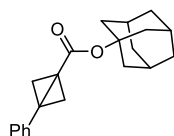

**Adamantan-1-yl 3-phenylbicyclo[1.1.0]butane-1-carboxylate (1n):** White solid (562 mg, 25% over 5 steps); m.p.: 101-102 °C;  $R_f$  = 0.4 (petroleum ether/EtOAc = 30/1);  $^1\text{H}$  NMR (400 MHz,  $\text{CDCl}_3$ ):  $\delta$  = 7.31-7.28 (m, 4H), 7.25-7.20 (m, 1H), 2.89 (t,  $J$  = 1.2 Hz, 2H), 2.0 (s, 3H), 1.75 (d,  $J$  = 2.8 Hz, 6H), 1.55 (s, 2H), 1.54-1.51 (m, 6H);  $^{13}\text{C}$  NMR (100 MHz,  $\text{CDCl}_3$ ):  $\delta$  = 168.6, 133.9, 128.2, 126.6, 125.8, 80.4, 41.1, 36.0, 35.7, 31.9, 30.7, 23.8 ppm; HRMS (ESI) calcd for  $\text{C}_{21}\text{H}_{25}\text{O}_2$   $[\text{M}+\text{H}]^+$  309.1849, found 309.1843.

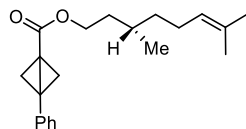

**(S)-3,7-dimethyloct-6-en-1-yl 3-phenylbicyclo[1.1.0]butane-1-carboxylate (1r):** Colorless oil (660 mg, 28% over 5 steps);  $R_f$  = 0.4 (petroleum ether/EtOAc = 30/1);  $^1\text{H}$  NMR (400 MHz,  $\text{CDCl}_3$ ):  $\delta$  = 7.30-7.27 (m, 4H), 7.25-7.20 (m, 1H), 5.06 (t,  $J$  = 7.2 Hz, 1H), 3.91 (t,  $J$  = 6.8 Hz, 2H), 2.94 (s, 2H), 1.95-1.83 (m, 2H), 1.69 (s, 3H), 1.60 (s, 5H), 1.39-1.28 (m, 2H), 1.23-1.02 (m, 3H), 0.73 (d,  $J$  = 6.4 Hz, 3H);  $^{13}\text{C}$  NMR (100 MHz,  $\text{CDCl}_3$ ):  $\delta$  = 169.7, 133.6, 131.2, 128.4, 126.9, 125.8, 124.6, 62.9, 36.8, 35.7, 35.5, 32.7, 29.1, 25.7, 25.2, 23.3, 19.1, 17.6 ppm; HRMS (ESI) calcd for  $\text{C}_{21}\text{H}_{29}\text{O}_2$   $[\text{M}+\text{H}]^+$  313.2162, found 313.2158.

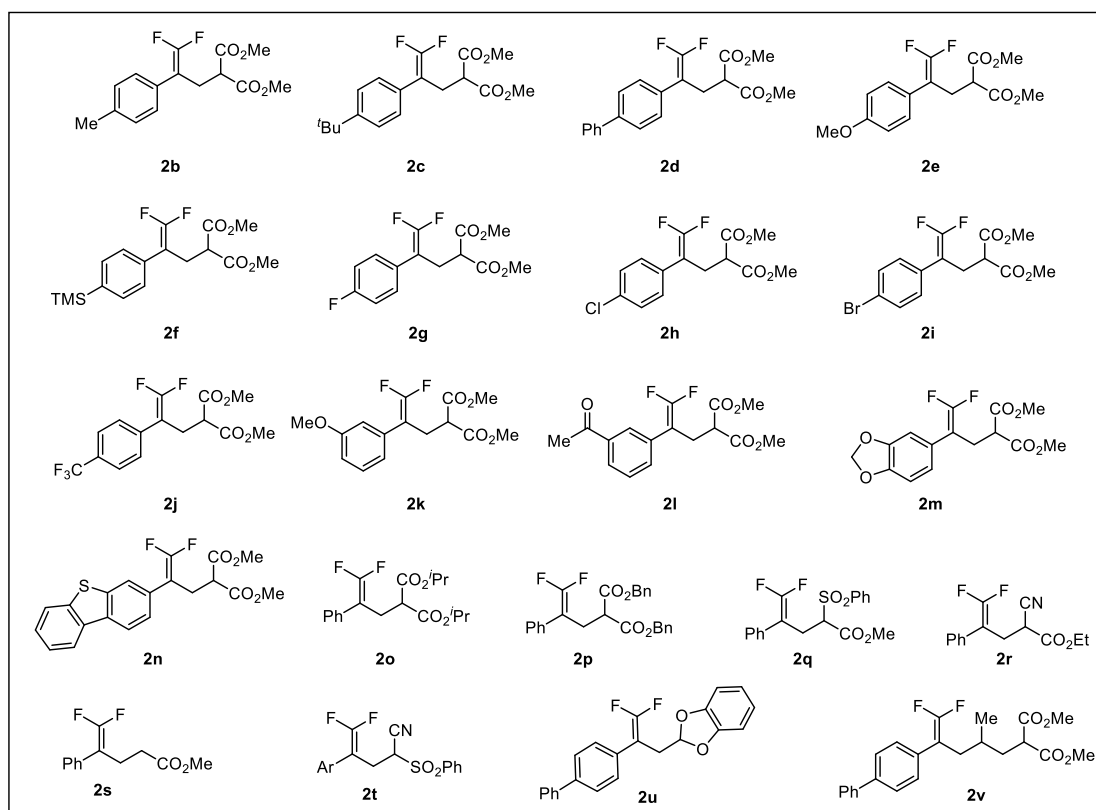

*gem*-Difluoroalkenes **2b-2r** and **2t** were prepared according to the reported methods.<sup>3</sup> **2s**<sup>4</sup>, **2u**<sup>5</sup> and **2v**<sup>6</sup> were prepared according to the reported methods.

### 3.2 Preparation of *gem*-Difluoroalkenes (**2b-2r** and **2t**)

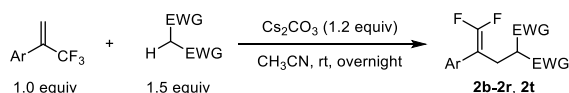

A round bottom flask equipped with a stir bar was charged with  $\text{Cs}_2\text{CO}_3$  (6.0 mmol, 1.2 equiv), then the flask was evacuated and backfilled with  $\text{N}_2$  for 3 times. A solution of nucleophile (7.5 mmol, 1.5 equiv) in  $\text{CH}_3\text{CN}$  (0.2 M) was successively added via a syringe under  $\text{N}_2$  atmosphere and stirred at room temperature for 1 hour. Then trifluoromethyl alkene (5.0 mmol, 1.0 equiv) in  $\text{CH}_3\text{CN}$  (0.5 M) was added to the reaction mixture and stirred at room temperature for overnight. After the reaction was completed,  $\text{H}_2\text{O}$  was added to quench the reaction and separated. The aqueous phase was extracted with EtOAc (x 3 times). The combined organic phases were washed with brine and dried over  $\text{Na}_2\text{SO}_4$ . After filtration, the solvent was evaporated under the reduced pressure, the residue was purified by silica gel column chromatography (eluent: PE/EA = 20:1-5:1) to afford the *gem*-difluoroalkenes **2b-2r** and **2t**.



## Characterization of Starting Materials

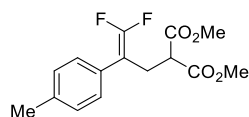

**Dimethyl 2-(3,3-difluoro-2-(*p*-tolyl)allyl)malonate (2b)**: colorless oil (81%, 1.20 g);  $R_f = 0.3$  (petroleum ether/EtOAc = 10/1);  $^1\text{H NMR}$  (400 MHz,  $\text{CDCl}_3$ ):  $\delta = 7.18\text{--}7.14$  (m, 4H), 3.66 (s, 6H), 3.36 (t,  $J = 8.0$  Hz, 1H), 3.01 (d,  $J = 7.6$  Hz, 2H), 2.34 (s, 3H);  $^{19}\text{F NMR}$  (376 MHz,  $\text{CDCl}_3$ ):  $\delta = -89.59$  (d,  $J = 38.7$  Hz),  $-89.94$  (d,  $J = 38.4$  Hz);  $^{13}\text{C NMR}$  (100 MHz,  $\text{CDCl}_3$ ):  $\delta = 168.9$ , 153.9 (t,  $J = 288.3$  Hz), 137.6, 129.3, 128.9, 128.3, 89.1 (dd,  $J = 20.5$ , 17.1 Hz), 52.5, 49.8, 27.4, 21.1 ppm; HRMS (ESI) calcd for  $\text{C}_{15}\text{H}_{17}\text{F}_2\text{O}_4$   $[\text{M}+\text{H}]^+$  299.1089, found 299.1085.

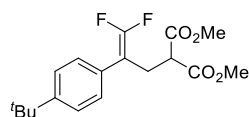

**Dimethyl 2-(2-(4-(*tert*-butyl)phenyl)-3,3-difluoroallyl)malonate (2c)**: colorless oil (76%, 1.29 g);  $R_f = 0.4$  (petroleum ether/EtOAc = 20/1);  $^1\text{H NMR}$  (400 MHz,  $\text{CDCl}_3$ ):  $\delta = 7.37$  (d,  $J = 8.0$  Hz, 2H), 7.20 (d,  $J = 8.0$  Hz, 2H), 3.66 (s, 6H), 3.38 (t,  $J = 8.0$  Hz, 1H), 3.02 (dt,  $J = 7.6$ , 2.0 Hz, 2H), 1.31 (s, 9H);  $^{19}\text{F NMR}$  (376 MHz,  $\text{CDCl}_3$ ):  $\delta = -89.44$  (d,  $J = 39.1$  Hz),  $-89.74$  (d,  $J = 38.7$  Hz);  $^{13}\text{C NMR}$  (100 MHz,  $\text{CDCl}_3$ ):  $\delta = 168.9$ , 153.9 (t,  $J = 288.3$  Hz), 150.7, 128.8, 128.1, 125.5, 89.0 (dd,  $J = 20.8$ , 17.2 Hz), 52.5, 49.9, 34.5, 31.2, 27.4. ppm; HRMS (ESI) calcd for  $\text{C}_{18}\text{H}_{23}\text{F}_2\text{O}_4$   $[\text{M}+\text{H}]^+$  341.1559, found 341.1552.

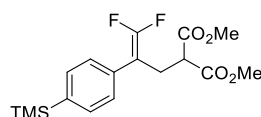

**Dimethyl 2-(3,3-difluoro-2-(4-(trimethylsilyl)phenyl)allyl)malonate (2f)**: colorless oil (68%, 1.21 g);  $R_f = 0.4$  (petroleum ether/EtOAc = 20/1);  $^1\text{H NMR}$  (400 MHz,  $\text{CDCl}_3$ ):  $\delta = 7.51$  (d,  $J = 8.0$  Hz, 2H), 7.25 (d,  $J = 8.0$  Hz, 2H), 3.66 (s, 6H), 3.40–3.35 (m, 1H), 3.07–3.02 (m, 2H), 0.27 (s, 9H);  $^{19}\text{F NMR}$  (376 MHz,  $\text{CDCl}_3$ ):  $\delta = -88.91$  (d,  $J = 36.8$  Hz),  $-89.17$  (d,  $J = 36.5$  Hz);  $^{13}\text{C NMR}$  (100 MHz,  $\text{CDCl}_3$ ):  $\delta = 168.9$ , 154.0 (t,  $J = 289.2$  Hz), 140.2, 133.6, 132.3, 127.6, 89.3 (dd,  $J = 20.1$ , 16.9 Hz), 52.6, 49.8, 27.3,  $-1.3$  ppm; HRMS (ESI) calcd for  $\text{C}_{17}\text{H}_{23}\text{F}_2\text{O}_4\text{Si}$   $[\text{M}+\text{H}]^+$  357.1328, found 357.1328.

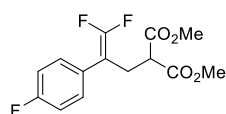

**Dimethyl 2-(3,3-difluoro-2-(4-fluorophenyl)allyl)malonate (2g)**: colorless oil (51%, 0.77 g);  $R_f = 0.3$  (petroleum ether/EtOAc = 10/1);  $^1\text{H NMR}$  (400 MHz,  $\text{CDCl}_3$ ):  $\delta = 7.26\text{--}7.22$  (m, 2H), 7.08–7.03 (m,

2H), 3.66 (s, 6H), 3.36-3.32 (m, 1H), 3.02-2.98 (m, 2H);  $^{19}\text{F}$  NMR (376 MHz,  $\text{CDCl}_3$ ):  $\delta = -89.15$  (d,  $J = 38.4$  Hz),  $-89.36$  (d,  $J = 38.0$  Hz),  $-113.5$ -- $-113.6$  (m);  $^{13}\text{C}$  NMR (100 MHz,  $\text{CDCl}_3$ ):  $\delta = 168.7$ ,  $162.1$  (d,  $J = 246.4$  Hz),  $153.9$  (t,  $J = 289.3$  Hz),  $130.3$  (d,  $J = 7.9$  Hz),  $127.9$ ,  $115.6$  (d,  $J = 21.3$  Hz),  $88.5$  (dd,  $J = 21.3$ ,  $17.3$  Hz),  $52.6$ ,  $49.8$ ,  $27.5$  ppm; HRMS (ESI) calcd for  $\text{C}_{14}\text{H}_{14}\text{F}_3\text{O}_4$   $[\text{M}+\text{H}]^+$  303.0839, found 303.0846.

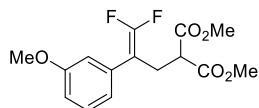

**Dimethyl 2-(3,3-difluoro-2-(3-methoxyphenyl)allyl)malonate (2k)**: colorless oil (53%, 0.83 g);  $R_f = 0.3$  (petroleum ether/EtOAc = 10/1);  $^1\text{H}$  NMR (400 MHz,  $\text{CDCl}_3$ ):  $\delta = 7.27$  (t,  $J = 8.0$  Hz, 1H),  $6.86$ - $6.80$  (m, 3H),  $3.80$  (s, 3H),  $3.66$  (s, 6H),  $3.37$  (t,  $J = 8.4$  Hz, 1H),  $3.01$  (d,  $J = 7.6$  Hz, 2H);  $^{19}\text{F}$  NMR (376 MHz,  $\text{CDCl}_3$ ):  $\delta = -88.49$  (d,  $J = 36.8$  Hz),  $-89.29$  (d,  $J = 36.8$  Hz);  $^{13}\text{C}$  NMR (100 MHz,  $\text{CDCl}_3$ ):  $\delta = 168.8$ ,  $159.6$ ,  $153.9$  (t,  $J = 288.9$  Hz),  $133.3$ ,  $129.6$ ,  $120.7$ ,  $114.3$ ,  $113.2$ ,  $89.2$  (dd,  $J = 20.9$ ,  $16.5$  Hz),  $55.2$ ,  $52.6$ ,  $49.8$ ,  $27.4$  ppm; HRMS (ESI) calcd for  $\text{C}_{15}\text{H}_{17}\text{F}_2\text{O}_5$   $[\text{M}+\text{H}]^+$  315.1039, found 315.1043.

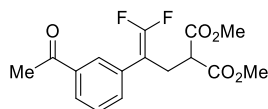

**Dimethyl 2-(2-(3-acetylphenyl)-3,3-difluoroallyl)malonate (2l)**: colorless oil (39%, 0.63 g);  $R_f = 0.2$  (petroleum ether/EtOAc = 5/1);  $^1\text{H}$  NMR (400 MHz,  $\text{CDCl}_3$ ):  $\delta = 7.88$ - $7.85$  (m, 2H),  $7.46$  (d,  $J = 4.8$  Hz, 2H),  $3.65$  (s, 6H),  $3.33$  (t,  $J = 8.0$  Hz, 1H),  $3.05$  (d,  $J = 7.6$  Hz, 2H),  $2.60$  (s, 3H);  $^{19}\text{F}$  NMR (376 MHz,  $\text{CDCl}_3$ ):  $\delta = -88.21$  (s);  $^{13}\text{C}$  NMR (100 MHz,  $\text{CDCl}_3$ ):  $\delta = 197.6$ ,  $168.6$ ,  $154.1$  (t,  $J = 289.3$  Hz),  $137.4$ ,  $133.1$ ,  $132.7$ ,  $129.0$ ,  $128.2$ ,  $127.8$ ,  $88.9$  (t,  $J = 18.9$  Hz),  $52.6$ ,  $49.8$ ,  $27.3$ ,  $26.6$  ppm; HRMS (ESI) calcd for  $\text{C}_{16}\text{H}_{17}\text{F}_2\text{O}_5$   $[\text{M}+\text{H}]^+$  327.1039, found 327.1031.

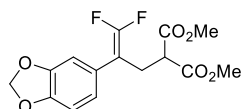

**Dimethyl 2-(2-(benzo[d][1,3]dioxol-5-yl)-3,3-difluoroallyl)malonate (2m)**: colorless oil (66%, 1.08 g);  $R_f = 0.2$  (petroleum ether/EtOAc = 5/1);  $^1\text{H}$  NMR (400 MHz,  $\text{CDCl}_3$ ):  $\delta = 6.79$ - $6.70$  (m, 3H),  $5.95$  (s, 2H),  $3.67$  (s, 6H),  $3.36$  (t,  $J = 8.0$  Hz, 1H),  $2.95$  (dt,  $J = 8.0$ ,  $2.4$  Hz, 2H);  $^{19}\text{F}$  NMR (376 MHz,  $\text{CDCl}_3$ ):  $\delta = -89.46$  (d,  $J = 38.7$  Hz),  $-90.16$  (d,  $J = 38.4$  Hz);  $^{13}\text{C}$  NMR (100 MHz,  $\text{CDCl}_3$ ):  $\delta = 168.8$ ,  $153.9$  (t,  $J = 287.8$  Hz),  $147.8$ ,  $147.1$ ,  $125.4$  (dd,  $J = 4.3$ ,  $2.6$  Hz),  $122.0$  (t,  $J = 2.9$  Hz),  $108.9$  (t,  $J = 3.2$  Hz),  $108.4$ ,  $101.2$ ,  $89.0$  (dd,  $J = 21.4$ ,  $17.0$  Hz),  $52.5$ ,  $49.7$  (t,  $J = 2.9$  Hz),  $27.7$  (d,  $J = 2.1$  Hz) ppm;

HRMS (ESI) calcd for C<sub>15</sub>H<sub>15</sub>F<sub>2</sub>O<sub>6</sub> [M+H]<sup>+</sup> 329.0831, found 329.0835.

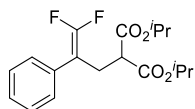

**Diisopropyl 2-(3,3-difluoro-2-phenylallyl)malonate (2o):** colorless oil (88%, 1.50 g);  $R_f = 0.5$  (petroleum ether/EtOAc = 10/1); <sup>1</sup>H NMR (400 MHz, CDCl<sub>3</sub>):  $\delta = 7.32\text{-}7.22$  (m, 5H), 4.99-4.90 (m, 2H), 3.19 (t,  $J = 8.0$  Hz, 1H), 2.95 (dt,  $J = 8.0, 2.4$  Hz, 2H), 1.16 (d,  $J = 2.4$  Hz, 6H), 1.14 (d,  $J = 2.4$  Hz, 6H); <sup>19</sup>F NMR (376 MHz, CDCl<sub>3</sub>):  $\delta = -89.60$  (d,  $J = 38.4$  Hz),  $-89.80$  (d,  $J = 38.4$  Hz); <sup>13</sup>C NMR (100 MHz, CDCl<sub>3</sub>):  $\delta = 168.0, 153.8$  (t,  $J = 288.3$  Hz), 132.1, 128.6, 128.0, 127.7, 89.4 (dd,  $J = 20.5, 16.6$  Hz), 69.0, 50.4, 27.1, 21.5, 21.4 ppm; HRMS (ESI) calcd for C<sub>18</sub>H<sub>22</sub>F<sub>2</sub>NaO<sub>4</sub> [M+Na]<sup>+</sup> 363.1378, found 363.1363.

#### 4. Detailed Optimization of Reaction Conditions

A 10 mL oven-dried Schlenk tube equipped with a magnetic stirrer was charged with BCB **1a** (0.2 mmol, 1.0 equiv), *gem*-difluoroalkene **2a** (0.3 mmol, 1.5 equiv), base (0.3 mmol, 1.5 equiv) and PC (2 mol%). Then the tube was evacuated and backfilled with nitrogen for three times., dry solvent (4 mL) was added by a syringe. The reaction mixture was then irradiated with 30 W blue LEDs (distance app. 3.0 cm from the bulb) at room temperature for 12 h. The solvent was removed in vacuo, 1,3,5-trimethoxybenzene (32.8 mg, 0.2 mmol, 1.0 equiv) was added as an internal standard, and yield was determined by <sup>1</sup>H NMR analysis of the crude mixture. The results are compiled in **Table S1**.

**Table S1 Optimization of the Reaction of BCB 1a and *gem*-Difluoroalkene 2a<sup>a</sup>****Catalyst**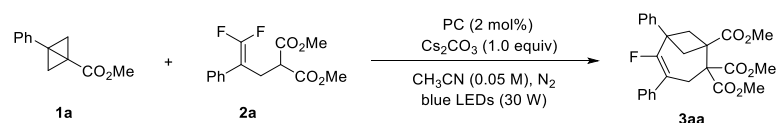

| entry    | PC                                                               | yield <sup>a</sup> (%) |
|----------|------------------------------------------------------------------|------------------------|
| 1        | 4CzIPN                                                           | 60                     |
| 2        | TPT                                                              | trace                  |
| 3        | [Acr <sup>+</sup> -Mes]ClO <sub>4</sub> <sup>-</sup>             | trace                  |
| 4        | Ir[dF(CF <sub>3</sub> )ppy <sub>2</sub> (dtbbpy)]PF <sub>6</sub> | 68                     |
| 5        | Ru(bpy) <sub>3</sub> Cl <sub>2</sub> ·6H <sub>2</sub> O          | 63                     |
| <b>6</b> | <b>Ru(bpy)<sub>3</sub>Cl<sub>2</sub></b>                         | <b>72</b>              |
| 7        | Ir(ppy) <sub>3</sub>                                             | 61                     |

<sup>a</sup>Reaction conditions: **1a** (0.2 mmol, 1.0 equiv), **2a** (0.24 mmol, 1.2 equiv), PC (2 mol%), Cs<sub>2</sub>CO<sub>3</sub> (0.2 mmol, 1.0 equiv), in CH<sub>3</sub>CN (0.05 M), blue LEDs (30 W), rt, for 12 h, under N<sub>2</sub>. TPT=2,4,6-triphenylpyrylium tetrafluoroborate. Yields were determined by <sup>1</sup>H NMR using 1,3,5-trimethoxybenzene as an internal standard.

**Solvent**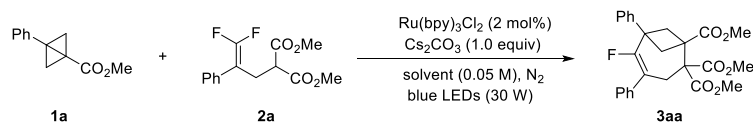

| entry    | solvent                 | yield <sup>a</sup> (%) |
|----------|-------------------------|------------------------|
| <b>1</b> | <b>CH<sub>3</sub>CN</b> | <b>72</b>              |
| 2        | acetone                 | 58                     |
| 3        | 1,4-dioxane             | 52                     |
| 4        | THF                     | 36                     |
| 5        | toluene                 | 65                     |
| 6        | DCE                     | 37                     |

<sup>a</sup>Reaction conditions: **1a** (0.2 mmol, 1.0 equiv), **2a** (0.24 mmol, 1.2 equiv), Ru(bpy)<sub>3</sub>Cl<sub>2</sub> (2 mol%), Cs<sub>2</sub>CO<sub>3</sub> (0.2 mmol, 1.0 equiv), in solvent (0.05 M), blue LEDs (30 W), rt, for 12 h, under N<sub>2</sub>. Yields were determined by <sup>1</sup>H NMR using 1,3,5-trimethoxybenzene as an internal standard.

## Base

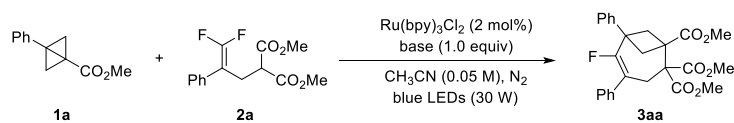

| entry    | base                            | yield <sup>a</sup> (%) |
|----------|---------------------------------|------------------------|
| <b>1</b> | Cs <sub>2</sub> CO <sub>3</sub> | <b>72</b>              |
| 2        | K <sub>2</sub> CO <sub>3</sub>  | 36                     |
| 3        | K <sub>3</sub> PO <sub>4</sub>  | 34                     |
| 4        | NaHCO <sub>3</sub>              | trace                  |
| 5        | DMAP                            | trace                  |
| 6        | Et <sub>3</sub> N               | trace                  |

<sup>a</sup>Reaction conditions: **1a** (0.2 mmol, 1.0 equiv), **2a** (0.24 mmol, 1.2 equiv), Ru(bpy)<sub>3</sub>Cl<sub>2</sub> (2 mol%), base (0.2 mmol, 1.0 equiv), in CH<sub>3</sub>CN (0.05 M), blue LEDs (30 W), rt, for 12 h, under N<sub>2</sub>. Yields were determined by <sup>1</sup>H NMR using 1,3,5-trimethoxybenzene as an internal standard.

## Ratio of 1a and 2a

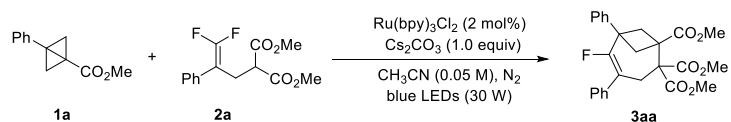

| entry                | <b>1a</b> : <b>2a</b> | yield <sup>a</sup> (%) |
|----------------------|-----------------------|------------------------|
| 1                    | 1 : 1                 | 63                     |
| 2                    | 1 : 1.2               | 72 (75) <sup>b</sup>   |
| <b>3<sup>c</sup></b> | <b>1 : 1.5</b>        | <b>80</b>              |
| 4                    | 1.2 : 1               | 72                     |
| 5                    | 1.5 : 1               | 60                     |
| 6                    | 2 : 1                 | 55                     |

<sup>a</sup>Reaction conditions: **1a**, **2a**, Ru(bpy)<sub>3</sub>Cl<sub>2</sub> (2 mol%), Cs<sub>2</sub>CO<sub>3</sub> (0.2 mmol, 1.0 equiv), in CH<sub>3</sub>CN (0.05 M), blue LEDs (30 W), rt, for 12 h, under N<sub>2</sub>. Yields were determined by <sup>1</sup>H NMR using 1,3,5-trimethoxybenzene as an internal standard. <sup>b</sup>Cs<sub>2</sub>CO<sub>3</sub> (0.24 mmol, 1.2 equiv), <sup>c</sup> Cs<sub>2</sub>CO<sub>3</sub> (0.3 mmol, 1.5 equiv).

## Time

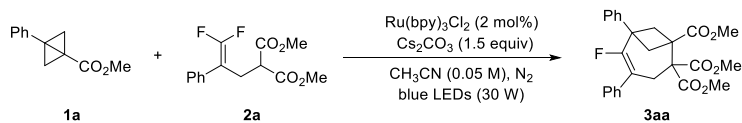

| entry | time (h) | yield <sup>a</sup> (%) |
|-------|----------|------------------------|
| 1     | 12       | 80                     |
| 2     | 18       | 88                     |
| 3     | 24       | 87                     |

<sup>a</sup>Reaction conditions: **1a** (0.2 mmol, 1.0 equiv), **2a** (0.3 mmol, 1.5 equiv), Ru(bpy)<sub>3</sub>Cl<sub>2</sub> (2 mol%), Cs<sub>2</sub>CO<sub>3</sub> (0.3 mmol, 1.5 equiv), in CH<sub>3</sub>CN (0.05 M), blue LEDs (30 W), rt, for x h, under N<sub>2</sub>. Yields were determined by <sup>1</sup>H NMR using 1,3,5-trimethoxybenzene as an internal standard.

## Light Source

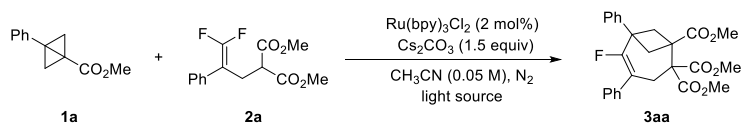

| entry | light source                   | yield <sup>a</sup> (%) |
|-------|--------------------------------|------------------------|
| 1     | blue LEDs (30 W, 460-465 nm)   | 88                     |
| 2     | purple LEDs (30 W, 390 nm)     | 80                     |
| 3     | white light (15 W, 390-780 nm) | 36                     |

<sup>a</sup>Reaction conditions: **1a** (0.2 mmol, 1.0 equiv), **2a** (0.3 mmol, 1.5 equiv), Ru(bpy)<sub>3</sub>Cl<sub>2</sub> (2 mol%), Cs<sub>2</sub>CO<sub>3</sub> (0.3 mmol, 1.5 equiv), in CH<sub>3</sub>CN (0.05 M), light source (x W), rt, for 18 h, under N<sub>2</sub>. Yields were determined by <sup>1</sup>H NMR using 1,3,5-trimethoxybenzene as an internal standard.

### Wattage of Blue LEDs

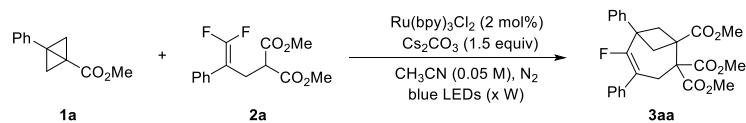

| entry    | blue LEDs (x W) | yield <sup>a</sup> (%) |
|----------|-----------------|------------------------|
| 1        | 5               | 60                     |
| 2        | 10              | 72                     |
| 3        | 20              | 75                     |
| <b>4</b> | <b>30</b>       | <b>88</b>              |
| 5        | 45              | 89                     |

<sup>a</sup>Reaction conditions: **1a** (0.2 mmol, 1.0 equiv), **2a** (0.3 mmol, 1.5 equiv), Ru(bpy)<sub>3</sub>Cl<sub>2</sub> (2 mol%), Cs<sub>2</sub>CO<sub>3</sub> (0.3 mmol, 1.5 equiv), in CH<sub>3</sub>CN (0.05 M), blue LEDs (x W), rt, for 18 h, under N<sub>2</sub>. Yields were determined by <sup>1</sup>H NMR using 1,3,5-trimethoxybenzene as an internal standard.

### Ratio of Ru(bpy)<sub>3</sub>Cl<sub>2</sub>

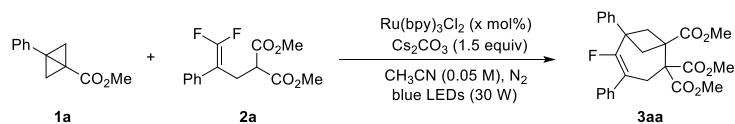

| entry    | x        | yield <sup>a</sup> (%)     |
|----------|----------|----------------------------|
| <b>1</b> | <b>1</b> | <b>89 (86)<sup>b</sup></b> |
| 2        | 2        | 88                         |

<sup>a</sup>Reaction conditions: **1a** (0.2 mmol, 1.0 equiv), **2a** (0.3 mmol, 1.5 equiv), Ru(bpy)<sub>3</sub>Cl<sub>2</sub> (x mol%), Cs<sub>2</sub>CO<sub>3</sub> (0.2 mmol, 1.5 equiv), in CH<sub>3</sub>CN (0.05 M), blue LEDs (30 W), rt, for 18 h, under N<sub>2</sub>. Yields were determined by <sup>1</sup>H NMR using 1,3,5-trimethoxybenzene as an internal standard. <sup>b</sup>Isolated yield.

### Controlled Experiments

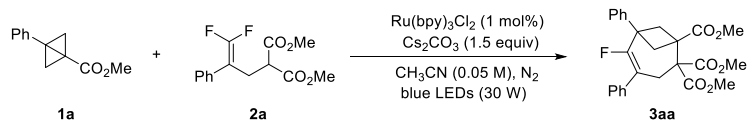

| entry    | deviation from standard conditions           | yield <sup>a</sup> (%)     |
|----------|----------------------------------------------|----------------------------|
| <b>1</b> | <b>Standard conditions</b>                   | <b>89 (86)<sup>b</sup></b> |
| 2        | Without $\text{Ru}(\text{bpy})_3\text{Cl}_2$ | 0                          |
| 3        | Without $\text{Cs}_2\text{CO}_3$             | 0                          |
| 4        | Without light                                | 0                          |
| 5        | Under air atmosphere                         | 0                          |

<sup>a</sup>Reaction conditions: **1a** (0.2 mmol, 1.0 equiv), **2a** (0.3 mmol, 1.5 equiv),  $\text{Ru}(\text{bpy})_3\text{Cl}_2$  (1 mol%),  $\text{Cs}_2\text{CO}_3$  (0.3 mmol, 1.5 equiv), in  $\text{CH}_3\text{CN}$  (0.05 M), blue LEDs (30 W), rt, for 18 h, under  $\text{N}_2$ . Yields were determined by  $^1\text{H}$  NMR using 1,3,5-trimethoxybenzene as an internal standard. <sup>b</sup>Isolated yield.



## 5. Representative Procedure for the Reaction of BCBs **1** and *gem*-Difluoroalkenes **2**

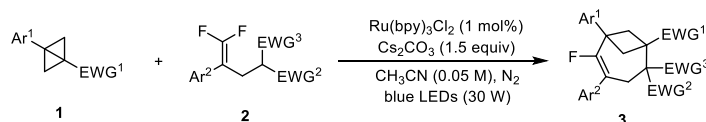

A 10 mL oven-dried Schlenk tube equipped with a magnetic stirrer was charged with BCBs **1** (0.2 mmol, 1.0 equiv), *gem*-difluoroalkenes **2** (0.3 mmol, 1.5 equiv), Cs<sub>2</sub>CO<sub>3</sub> (0.3 mmol, 1.5 equiv) and Ru(bpy)<sub>3</sub>Cl<sub>2</sub> (1 mol%). Then the tube was evacuated and backfilled with nitrogen for three times, dry solvent (4 mL) was added by a syringe. The reaction mixture was then irradiated with 30 W blue LEDs at room temperature for 12 h. After that, the solvent was removed in vacuo. The final product **3** was obtained by silica gel column chromatography using petroleum ether/EtOAc as eluent (petroleum ether/EtOAc = 5/1 to 3/1).

## 6. Scale-Up Synthesis

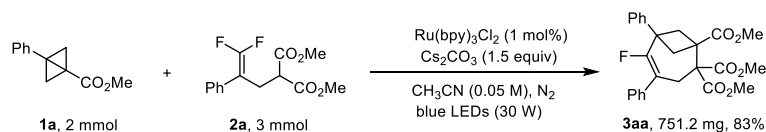

A 100 mL oven-dried Schlenk tube equipped with a magnetic stirrer was charged with BCB **1a** (376.5 mg, 2 mmol, 1.0 equiv), *gem*-difluoroalkene **2a** (852.8 mg, 3 mmol, 1.5 equiv), Cs<sub>2</sub>CO<sub>3</sub> (977.4 mg, 3 mmol, 1.5 equiv) and Ru(bpy)<sub>3</sub>Cl<sub>2</sub> (12.8 mg, 1 mol%). Then the tube was evacuated and backfilled with nitrogen for three times., dry solvent (40 mL) was added by a syringe. The reaction mixture was then irradiated with 30 W blue LEDs at room temperature for 24 h. After that, the solvent was removed in vacuo. The final product was obtained by silica gel column chromatography using petroleum ether/EtOAc as eluent (petroleum ether/EtOAc = 5/1 to 3/1) to afford the desired product **3aa** (83%, 751.2 mg).

## 7. Derivatizations of Products

### 7.1 Synthesis of the Compound **4aa**<sup>7</sup>

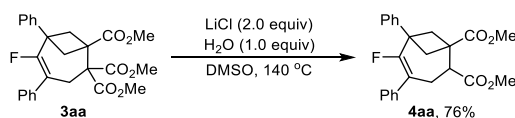

To a suspension of **3aa** (90.4 mg, 0.2 mmol, 1.0 equiv) in DMSO (1.0 mL) were added LiCl (17.0 mg, 0.4 mmol, 2.0 equiv) and H<sub>2</sub>O (3.6  $\mu$ L, 0.2 mmol, 1.0 equiv). The reaction mixture was heated to 140 °C and stirred for 4 h. Water (5.0 mL) was added and the resultant mixture was extracted with EtOAc for three times. The combined organic phase was dried over anhydrous Na<sub>2</sub>SO<sub>4</sub>, filtered and concentrated under reduced pressure. The residue was purified by silica gel column chromatography (petroleum ether/EtOAc = 5/1) to afford product **4aa** (60.0 mg, 76%) as colorless oil.

### 7.2 Synthesis of the Compound **5aa**<sup>8</sup>

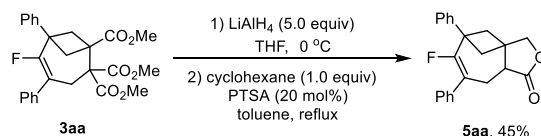

To a suspension of **3aa** (116.5 mg, 0.3 mmol, 1.0 equiv) in THF (2.0 mL) at 0 °C was added LiAlH<sub>4</sub> (57.0 mg, 1.5 mmol, 5.0 equiv). The resulting mixture was stirred at room temperature for 1 h, cool to 0 °C, and quenched successively with H<sub>2</sub>O (60.0  $\mu$ L), 15% aqueous NaOH (60.0  $\mu$ L) and H<sub>2</sub>O (180.0  $\mu$ L). The mixture was stirred for 30 min, then anhydrous Na<sub>2</sub>SO<sub>4</sub> was added. After stirring for another 30 min, the mixture was filtered and concentrated under reduced pressure to give crude product, which was directly used in the next step without further purification.

To a suspension of crude product in toluene (2.0 mL) was added cyclohexanone (31.1  $\mu$ L, 0.3 mmol, 1.0 equiv), *p*-toluenesulfonic acid (5.2 mg, 0.03 mmol, 0.1 equiv). The reaction mixture was refluxed for 8 h, then the solvent was removed under reduced pressure. The residue was purified by silica gel column chromatography (petroleum ether/EtOAc = 10/1) to afford product **5aa** (45.1 mg, 45%) as colorless oil.

### 7.3 Synthesis of the Compound **6ka** and **6ka'**<sup>9</sup>

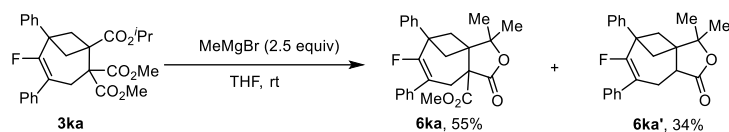

To an oven-dried 10 mL Schlenk tube equipped with a Teflon coated magnetic stir bar was added **3ka** (96.0 mg, 0.2 mmol, 1.0 equiv). The tube was evacuated and backfilled with nitrogen (3 times). Subsequently, THF (2 mL) was added. A solution of methylmagnesium bromide in THF (0.5 mmol, 2.5 equiv, 3.0 M) was added dropwise into the reaction vessel under nitrogen. After stirring at room temperature for 3 h, the reaction was quenched with saturated NH<sub>4</sub>Cl aqueous solution. The aqueous layer was extracted with ethyl acetate, the combined organic layer was dried over Na<sub>2</sub>SO<sub>4</sub>, filtered and concentrated under the reduced pressure, the mixture was purified by silica gel column chromatography (petroleum ether/EtOAc = 5/1) to afford product **6ka** (46.2 mg, 55%) as colorless oil and **6ka'** (24.7 mg, 34%) as a white solid.

### 7.4 Synthesis of the Compound **7la**<sup>10</sup>

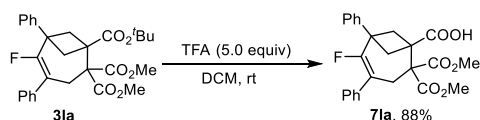

Compound **3la** (98.9 mg, 0.2 mmol, 1.0 equiv) was dissolved in anhydrous DCM (2 mL) and was treated with TFA (77.0  $\mu$ L, 1.0 mmol, 5.0 equiv) at 0 °C. The reaction mixture was stirred at room temperature overnight. After that, the reaction mixture was cooled in ice-water bath and was quenched by saturated aqueous NaHCO<sub>3</sub> and was extracted with DCM. The combined organic layer was dried over anhydrous Na<sub>2</sub>SO<sub>4</sub>, followed by filtration and evaporation of the solvent to give product **7la** (87.7 mg, 88%) as a white solid.

### 7.5 Synthesis of the Compound **8la**<sup>11</sup>

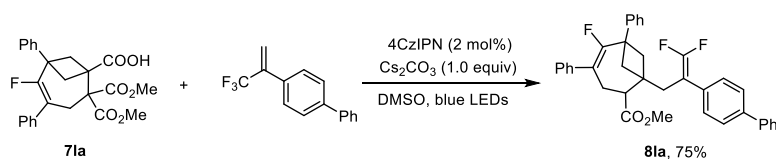

A 10 mL oven-dried Schlenk-tube equipped with a magnetic stirrer was charged with Compound **7la** (43.8 mg, 0.1 mmol, 1.0 equiv),  $\alpha$ -CF<sub>3</sub> alkenes (49.7 mg, 0.2 mmol, 2.0 equiv),

4CzIPN (1.58 mg, 2 mol%), Cs<sub>2</sub>CO<sub>3</sub> (65.2 mg, 0.2 mmol, 2.0 equiv). Then, the tube was evacuated and backfilled with nitrogen (three times). Subsequently, dry DMSO (1.0 mL) was added by a syringe. The reaction mixture was stirred under the irradiation of a 30 W Blue LED ( $\lambda = 455\text{-}460\text{ nm}$ ) for 18 h. After that, the resulting mixture was quenched with H<sub>2</sub>O and extracted with EtOAc (3 × 10 mL). The combined organic layer was dried over anhydrous Na<sub>2</sub>SO<sub>4</sub> and concentrated under reduced pressure. The crude product was purified by silica gel column chromatography (petroleum ether/EtOAc = 10:1 to 5:1) to afford product **8la** (42.3 mg, 75%) as a white solid.

## 7.6 Synthesis of the Compound **9la**<sup>12</sup>

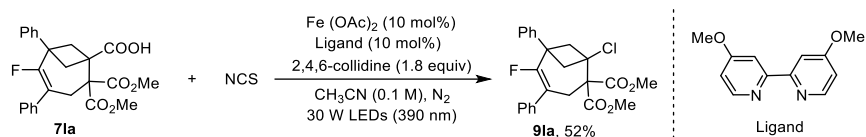

An oven-dried 10 mL Schlenk tube equipped with a magnetic stir bar was charged with **7la** (43.8 mg, 0.1 mmol, 1.0 equiv.), ligand (10 mol%, 8.6 mg), NCS (*N*-chlorosuccinimide) (28.0 mg, 0.21 mmol, 2.1 equiv.). Then the Schlenk-tube was transferred to nitrogen-filled glovebox to add Fe(OAc)<sub>2</sub> (6.9 mg, 10 mol%,) and anhydride MeCN (1 mL). After that, the Schlenk-tube was sealed with rubber plug and taken out of the glovebox. The reaction mixture was added 2,4,6-collidine (24  $\mu$ L, 0.18 mmol, 1.8 equiv.) via syringe. Finally, the reaction mixture was stirred and irradiated for 12 h under LEDs (30 W, 390 nm), cooling with a fan. Then the solvent was removed under reduced pressure. The residue was purified by silica gel column chromatography (petroleum ether/EtOAc = 10/1) to afford product **9la** (22.3 mg, 52%) as colorless oil.

## 7.7 Synthesis of the Compound **10la**<sup>12</sup>

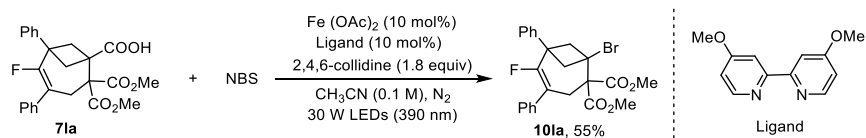

An oven-dried 10 mL Schlenk tube equipped with a magnetic stir bar was charged with **7la** (43.8 mg, 0.1 mmol, 1.0 equiv.), ligand (10 mol%, 8.6 mg), NBS (*N*-Bromosuccinimide) (37.4 mg, 0.21 mmol, 2.1 equiv.). Then the Schlenk-tube was transferred to nitrogen-filled glovebox to add Fe(OAc)<sub>2</sub> (6.9 mg, 10 mol%,) and anhydride MeCN (1 mL). After that, the Schlenk tube was

sealed with rubber plug and taken out of the glovebox. The reaction mixture was added 2,4,6-collidine (24  $\mu$ l, 0.18 mmol, 1.8 equiv.) via syringe. Finally, the reaction mixture was stirred and irradiated for 12 h under LEDs (30 W, 390 nm), cooling with a fan. Then the solvent was removed under reduced pressure. The residue was purified by silica gel column chromatography (petroleum ether/EtOAc = 10/1) to afford product **10la** (26.1 mg, 55%) as colorless oil.

## 8 Mechanistic Investigation

### 8.1 TEMPO-Trapping Experiment

#### a) Radical trapping experiment with TEMPO

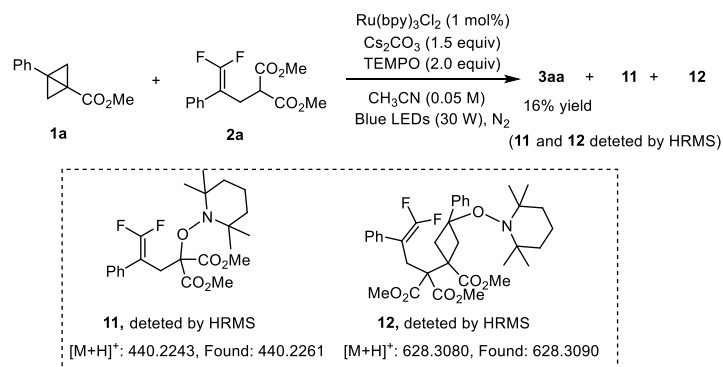

A 10 mL oven-dried Schlenk tube equipped with a magnetic stirrer was charged with BCB **1a** (0.2 mmol, 1.0 equiv), *gem*-difluoroalkene **2a** (0.3 mmol, 1.5 equiv), Cs<sub>2</sub>CO<sub>3</sub> (0.3 mmol, 1.5 equiv), Ru(bpy)<sub>3</sub>Cl<sub>2</sub> (1 mol%) and TEMPO (0.4 mmol, 2.0 equiv). Then the tube was evacuated and backfilled with nitrogen for three times., dry solvent (4 mL) was added by a syringe. The reaction mixture was then irradiated with 30 W blue LEDs at room temperature for 12 h. After that, a 16% yield of **3aa** was obtained, along with the TEMPO adduct **11** and TEMPO adduct **12** detected by HRMS. This result indicated that a radical pathway might be involved in this transformation.

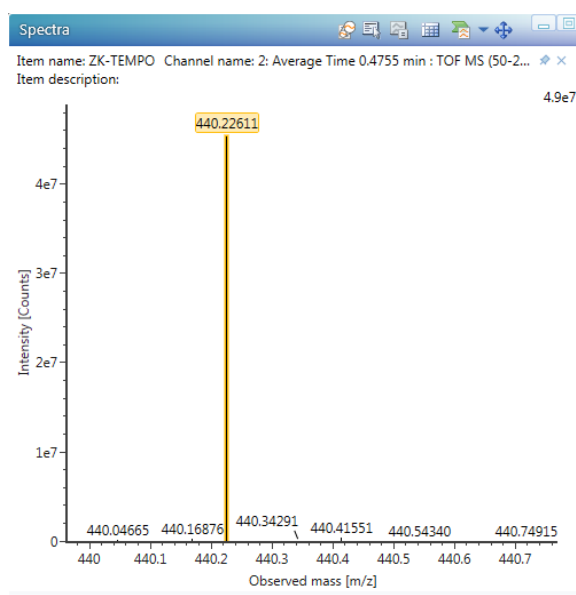

**Figure S1.** TEMPO adduct **11** detected by HRMS

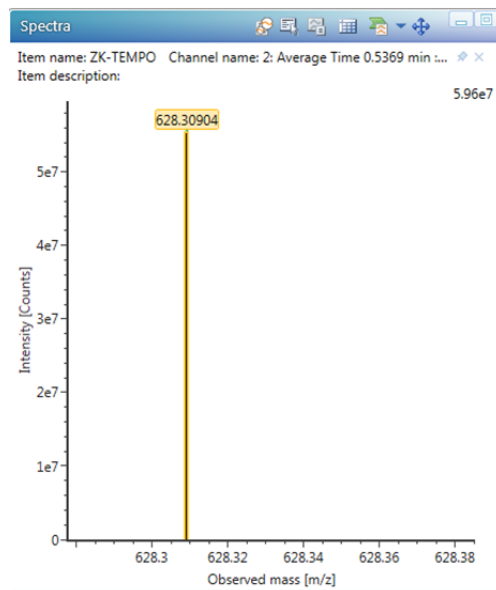

**Figure S2.** TEMPO adduct **12** detected by HRMS

## 8.2 Stern-Volmer Fluorescence Quenching Experiments

To a solution of 4CzIPN in anhydrous, N<sub>2</sub>-saturated DMSO ( $5.0 \times 10^{-4}$  mol/L) in a quartz cuvette, different amounts of BCB **1a**, and *gem*-difluoroalkene **2a**, Cs<sub>2</sub>CO<sub>3</sub>, *gem*-difluoroalkene **2a** + Cs<sub>2</sub>CO<sub>3</sub> were added, respectively, and the resulting changes in fluorescence intensity were collected. The emission intensity at 525 nm was collected with excited wavelength of 470 nm. The results are shown in Figure S3, S4, S5 and S6.

According to the results as well as the corresponding Stern-Volmer plots (Figure S3, S4, S5 and S6), the BCB **1a**, **2a** and Cs<sub>2</sub>CO<sub>3</sub> did not show an obvious quenching effect to the fluorescence intensity of 4CzIPN. While the *gem*-difluoroalkene **2a** + Cs<sub>2</sub>CO<sub>3</sub> showed an obvious quenching to the fluorescence intensity of 4CzIPN.

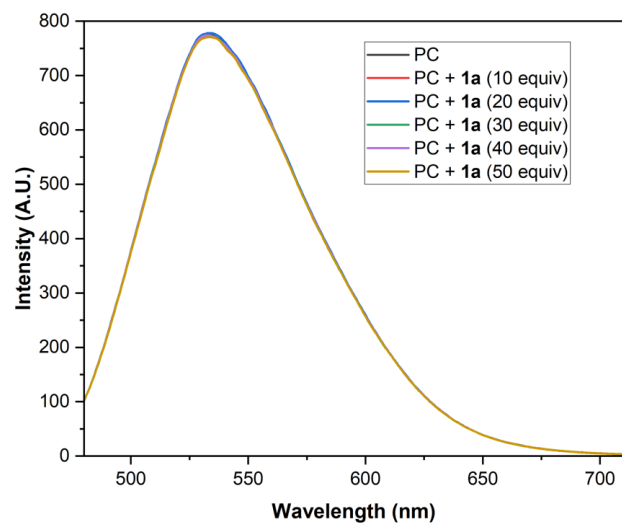

**Figure S3** Fluorescence quenching with **1a**

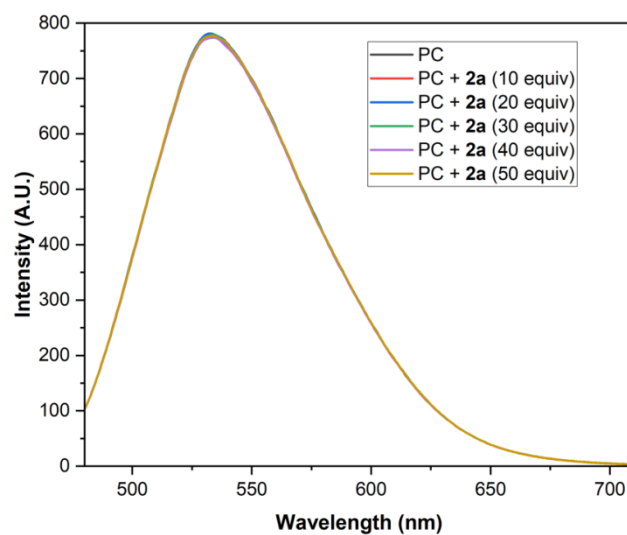

**Figure S4** Fluorescence quenching with **2a**

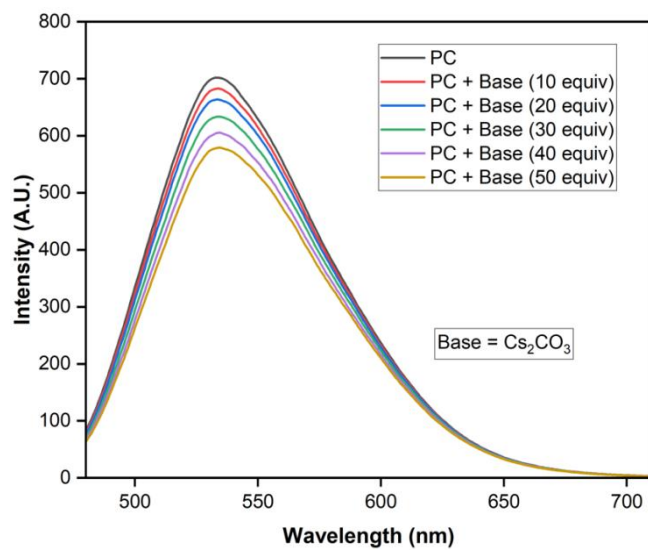

**Figure S5** Fluorescence quenching with  $\text{Cs}_2\text{CO}_3$



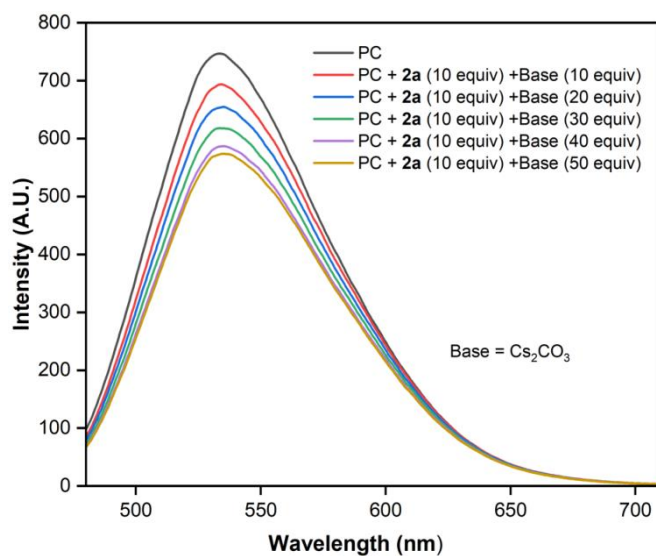

**Figure S6** Fluorescence quenching with **2a** +  $\text{Cs}_2\text{CO}_3$

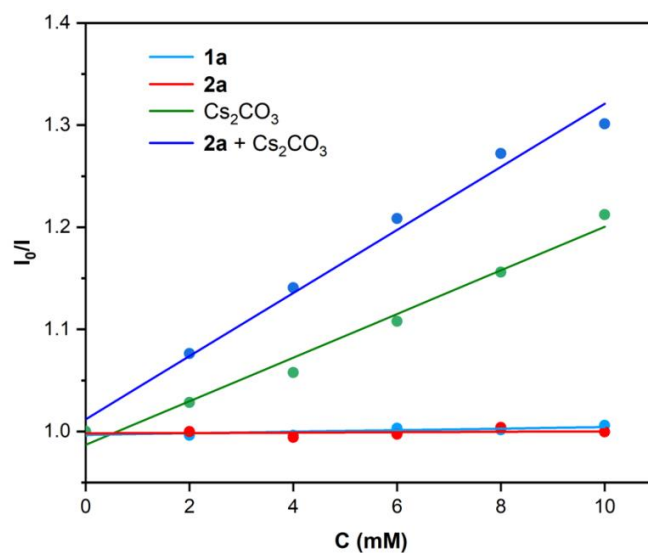

**Figure S7** Stern-Volmer Plots of **1a**, **2a**,  $\text{Cs}_2\text{CO}_3$  and **2a** +  $\text{Cs}_2\text{CO}_3$

### 8.3 Light On-Off Experiments

To further examine the impact of light, we conducted experiments under alternating periods of irradiation and darkness. The yield of **3aa** was determined by crude  $^1\text{H}$  NMR spectra using 1,3,5-trimethoxybenzene as an internal standard. The results are shown in **Figure S4**.

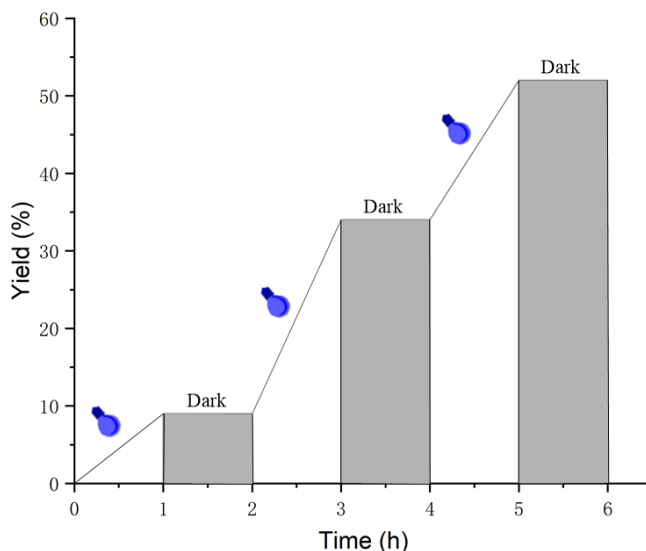

**Figure S8.** Light On-Off Experiments

The results of light on-off experiments showed that the reaction proceeded only during the visible light irradiation, suggesting that the reaction may proceed by a catalytic process rather than by a radical chain process.

## 8.4 Cyclic voltammetry (CV) measurements

Cyclic voltammetry was conducted on an Electrochemical Workstation using a 3-electrode cell configuration. A glassy carbon working electrode was employed alongside a platinum wire counter electrode and a Ag/AgCl reference electrode. CH<sub>3</sub>CN was degassed by bubbling N<sub>2</sub> prior to measurements. 0.01 M solutions of **1a** or **2a** in CH<sub>3</sub>CN were freshly prepared along with 0.1 M of *n*-Bu<sub>4</sub>NPF<sub>6</sub> as supporting electrolyte and were examined at a scan 100 mV/s. The results of cyclic voltammetry experiments indicated that the oxidation potential of BCB **1a** ( $E_{1/2}^{ox} = +1.4$  V vs SCE) is inaccessible for the Ru(bpy)<sub>3</sub>Cl<sub>2</sub> excited state ( $E_{1/2}^{ox} = +0.77$  V vs SCE). The oxidation potential of compound **2a** can be effectively reduced from  $E_{1/2}^{ox} = 0.69$  V (vs SCE) to  $E_{1/2}^{ox} = 0.56$  V (vs SCE) in the presence of base, which is considered the oxidation of **2a** by the Ru(bpy)<sub>3</sub>Cl<sub>2</sub> is thermodynamically feasible.

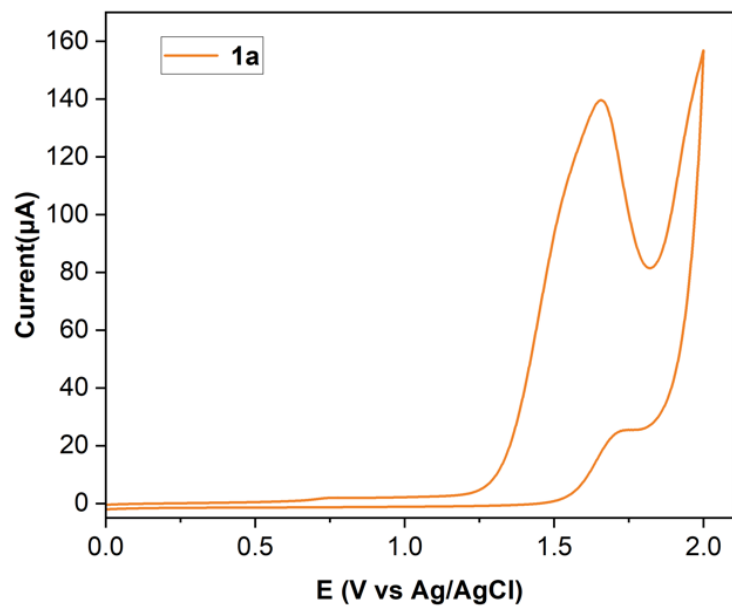

**Figure S9.** Cyclic voltammogram of **1a** in CH<sub>3</sub>CN.

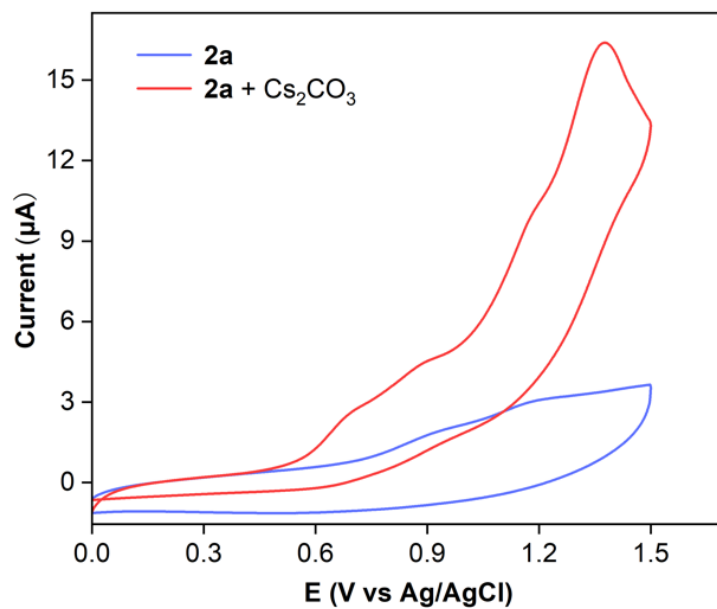

**Figure S10.** Cyclic voltammogram of **2a** and **2a** + Cs<sub>2</sub>CO<sub>3</sub> in CH<sub>3</sub>CN.

## 9 Characterization Date of Products

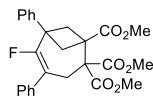

**Trimethyl 5-fluoro-4,6-diphenylbicyclo[4.1.1]oct-4-ene-1,2,2-tricarboxylate (3aa):** White solid (86%, 77.8 mg); m.p.: 104-105 °C;  $R_f = 0.3$  (petroleum ether/EtOAc = 3/1);  $^1\text{H}$  NMR (400 MHz,  $\text{CDCl}_3$ ):  $\delta = 7.49\text{-}7.46$  (m, 2H), 7.41-7.37 (m, 2H), 7.34-7.29 (m, 3H), 7.25-7.20 (m, 3H), 3.81 (s, 6H), 3.71 (s, 3H), 3.58 (d,  $J = 4.8$  Hz, 2H), 3.38-3.34 (m, 2H), 3.09-3.05 (m, 2H);  $^{19}\text{F}$  NMR (376 MHz,  $\text{CDCl}_3$ ):  $\delta = -98.26$  (s);  $^{13}\text{C}$  NMR (100 MHz,  $\text{CDCl}_3$ ):  $\delta = 173.4, 171.2, 160.1$  (d,  $J = 258.8$  Hz), 143.3 (d,  $J = 4.8$  Hz), 138.2, 128.6 (d,  $J = 3.6$  Hz), 128.2, 128.0, 126.9, 126.7, 126.1, 112.9 (d,  $J = 18.0$  Hz), 62.7, 52.8, 52.7, 48.6, 45.0 (d,  $J = 27.7$  Hz), 41.4, 36.5 (d,  $J = 4.4$  Hz) ppm; HRMS (ESI) calcd for  $\text{C}_{26}\text{H}_{26}\text{FO}_6$   $[\text{M}+\text{H}]^+$  453.1708, found 453.1704.

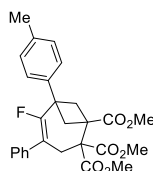

**Trimethyl 5-fluoro-4-phenyl-6-(p-tolyl)bicyclo[4.1.1]oct-4-ene-1,2,2-tricarboxylate (3ba):** White solid (95%, 88.5 mg); m.p.: 112-113 °C;  $R_f = 0.3$  (petroleum ether/EtOAc = 3/1);  $^1\text{H}$  NMR (400 MHz,  $\text{CDCl}_3$ ):  $\delta = 7.51\text{-}7.48$  (m, 2H), 7.35-7.31 (m, 2H), 7.27-7.20 (m, 3H), 7.14-7.10 (m, 2H), 3.82 (s, 6H), 3.72 (s, 3H), 3.58 (d,  $J = 4.4$  Hz, 2H), 3.38-3.33 (m, 2H), 3.08-3.04 (m, 2H), 2.38 (s, 3H);  $^{19}\text{F}$  NMR (376 MHz,  $\text{CDCl}_3$ ):  $\delta = -97.55$  (s);  $^{13}\text{C}$  NMR (100 MHz,  $\text{CDCl}_3$ ):  $\delta = 173.4, 171.2, 160.2$  (d,  $J = 258.9$  Hz), 140.4 (d,  $J = 5.2$  Hz), 138.2, 136.3, 128.8, 128.6 (d,  $J = 3.3$  Hz), 127.9, 126.9, 126.0, 112.7 (d,  $J = 17.9$  Hz), 62.7, 52.7, 52.6, 44.7 (d,  $J = 27.7$  Hz), 44.5, 41.4, 36.5 (d,  $J = 4.5$  Hz), 21.0 ppm; HRMS (ESI) calcd for  $\text{C}_{27}\text{H}_{27}\text{NaFO}_6$   $[\text{M}+\text{Na}]^+$  489.1684, found 489.1673.

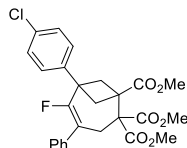

**Trimethyl 6-(4-chlorophenyl)-5-fluoro-4-phenylbicyclo[4.1.1]oct-4-ene-1,2,2-tricarboxylate (3ca):** White solid (86%, 79.5 mg); m.p.: 127-128 °C;  $R_f = 0.3$  (petroleum ether/EtOAc = 3/1);  $^1\text{H}$  NMR (400 MHz,  $\text{CDCl}_3$ ):  $\delta = 7.46\text{-}7.43$  (m, 2H), 7.36-7.30 (m, 4H), 7.25-7.20 (m, 1H), 7.14-7.11 (m, 2H), 3.80 (s, 6H), 3.72 (s, 3H), 3.55 (d,  $J = 4.8$  Hz, 2H), 3.31-3.27 (m, 2H), 3.06-3.02 (m, 2H);  $^{19}\text{F}$  NMR (376 MHz,

CDCl<sub>3</sub>):  $\delta$  = -98.70 (s); <sup>13</sup>C NMR (100 MHz, CDCl<sub>3</sub>):  $\delta$  = 173.2, 171.1, 159.6 (d,  $J$  = 258.7 Hz), 141.8 (d,  $J$  = 4.8 Hz), 138.0, 132.6, 128.6 (d,  $J$  = 3.6 Hz), 128.4, 128.0, 127.6, 127.1, 113.2 (d,  $J$  = 17.3 Hz), 62.6, 52.9, 52.8, 48.5, 44.7 (d,  $J$  = 27.7 Hz), 41.4, 36.5 (d,  $J$  = 4.7 Hz) ppm; HRMS (ESI) calcd for C<sub>26</sub>H<sub>25</sub>ClFO<sub>6</sub> [M+H]<sup>+</sup> 487.1318, found 487.1322.

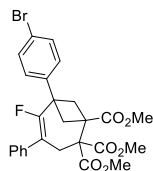

**Trimethyl 6-(4-bromophenyl)-5-fluoro-4-phenylbicyclo[4.1.1]oct-4-ene-1,2,2-tricarboxylate (3da):**

White solid (77%, 81.7 mg); m.p.: 147-148 °C;  $R_f$  = 0.3 (petroleum ether/EtOAc = 3/1); <sup>1</sup>H NMR (400 MHz, CDCl<sub>3</sub>):  $\delta$  = 7.51-7.48 (m, 2H), 7.46-7.43 (m, 2H), 7.34-7.30 (m, 2H), 7.25-7.21 (m, 1H), 7.09-7.05 (m, 2H), 3.80 (s, 6H), 3.71 (s, 3H), 3.55 (d,  $J$  = 4.8 Hz, 2H), 3.30-3.26 (m, 2H), 3.05-3.01 (m, 2H); <sup>19</sup>F NMR (376 MHz, CDCl<sub>3</sub>):  $\delta$  = -98.68 (s); <sup>13</sup>C NMR (100 MHz, CDCl<sub>3</sub>):  $\delta$  = 173.2, 171.1, 159.5 (d,  $J$  = 258.8 Hz), 142.3 (d,  $J$  = 5.5 Hz), 138.0, 131.3, 128.6 (d,  $J$  = 3.1 Hz), 128.0, 127.1, 120.7, 113.3 (d,  $J$  = 17.5 Hz), 62.6, 52.9, 52.8, 48.5, 44.7 (d,  $J$  = 27.7 Hz), 41.4, 36.6 (d,  $J$  = 4.6 Hz) ppm; HRMS (ESI) calcd for C<sub>26</sub>H<sub>25</sub>BrFO<sub>6</sub> [M+H]<sup>+</sup> 531.0813, found 531.0832.

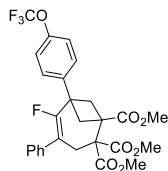

**Trimethyl 5-fluoro-4-phenyl-6-(4-(trifluoromethoxy)phenyl)bicyclo[4.1.1]oct-4-ene-1,2,2-tricarboxylate (3ea):** Colorless oil (97%, 104.1 mg);  $R_f$  = 0.3 (petroleum ether/EtOAc = 3/1); <sup>1</sup>H NMR (400 MHz, CDCl<sub>3</sub>):  $\delta$  = 7.46-7.43 (m, 2H), 7.34-7.30 (m, 2H), 7.25-7.23 (m, 1H), 7.21 (s, 4H), 3.80 (s, 6H), 3.72 (s, 3H), 3.56 (d,  $J$  = 4.8 Hz, 2H), 3.33-3.29 (m, 2H), 3.08-3.03 (m, 2H); <sup>19</sup>F NMR (376 MHz, CDCl<sub>3</sub>):  $\delta$  = -57.71 (s), -97.94 (s); <sup>13</sup>C NMR (100 MHz, CDCl<sub>3</sub>):  $\delta$  = 173.3, 171.1, 159.5 (d,  $J$  = 258.8 Hz), 147.9, 141.9 (d,  $J$  = 5.2 Hz), 138.1, 128.6 (d,  $J$  = 3.1 Hz), 128.1, 127.7, 127.1, 120.8, 120.4 (q,  $J$  = 255.7 Hz), 113.3 (d,  $J$  = 17.6 Hz), 62.7, 52.9, 52.8, 48.5, 44.7 (d,  $J$  = 27.7 Hz), 41.4, 36.6 (d,  $J$  = 4.5 Hz) ppm; HRMS (ESI) calcd for C<sub>27</sub>H<sub>25</sub>F<sub>4</sub>O<sub>7</sub> [M+H]<sup>+</sup> 537.1531, found 537.1539.

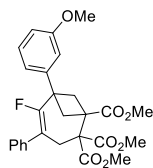

**Trimethyl 5-fluoro-6-(3-methoxyphenyl)-4-phenylbicyclo[4.1.1]oct-4-ene-1,2,2-tricarboxylate**

(**3fa**): Colorless oil (87%, 84.3 mg);  $R_f = 0.3$  (petroleum ether/EtOAc = 3/1);  $^1\text{H NMR}$  (400 MHz,  $\text{CDCl}_3$ ):  $\delta = 7.49\text{--}7.45$  (m, 2H), 7.34–7.29 (m, 3H), 7.25–7.20 (m, 1H), 6.84–6.73 (m, 3H), 3.82–3.80 (m, 9H), 3.71 (s, 3H), 3.57 (d,  $J = 4.8$  Hz, 2H), 3.36–3.33 (m, 2H), 3.05–3.02 (m, 2H);  $^{19}\text{F NMR}$  (376 MHz,  $\text{CDCl}_3$ ):  $\delta = -98.03$  (s);  $^{13}\text{C NMR}$  (100 MHz,  $\text{CDCl}_3$ ):  $\delta = 173.4, 171.2, 160.0$  (d,  $J = 259.1$  Hz), 159.4, 144.9 (d,  $J = 4.9$  Hz), 138.2, 129.2, 128.7 (d,  $J = 3.0$  Hz), 127.9, 126.9, 118.5, 112.9 (d,  $J = 17.4$  Hz), 112.2, 111.9, 62.7, 55.1, 52.8, 52.7, 48.4, 45.0 (d,  $J = 27.7$  Hz), 41.4, 36.5 (d,  $J = 4.5$  Hz) ppm; HRMS (ESI) calcd for  $\text{C}_{27}\text{H}_{28}\text{FO}_7$   $[\text{M}+\text{H}]^+$  483.1814, found 483.1817.

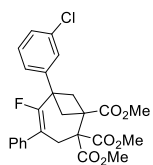

**Trimethyl 6-(3-chlorophenyl)-5-fluoro-4-phenylbicyclo[4.1.1]oct-4-ene-1,2,2-tricarboxylate (3ga):**

White solid (87%, 89.5 mg); m.p.: 173–174 °C;  $R_f = 0.3$  (petroleum ether/EtOAc = 3/1);  $^1\text{H NMR}$  (400 MHz,  $\text{CDCl}_3$ ):  $\delta = 7.46\text{--}7.43$  (m, 2H), 7.34–7.28 (m, 3H), 7.26–7.18 (m, 3H), 7.09–7.06 (m, 1H), 3.80 (s, 6H), 3.72 (s, 3H), 3.55 (d,  $J = 4.8$  Hz, 2H), 3.33–3.29 (m, 2H), 3.06–3.02 (m, 2H);  $^{19}\text{F NMR}$  (376 MHz,  $\text{CDCl}_3$ ):  $\delta = -98.03$  (s);  $^{13}\text{C NMR}$  (100 MHz,  $\text{CDCl}_3$ ):  $\delta = 173.2, 171.1, 159.4$  (d,  $J = 258.8$  Hz), 145.2 (d,  $J = 4.9$  Hz), 138.0, 134.1, 129.5, 128.6 (d,  $J = 3.4$  Hz), 128.0, 127.1, 127.0, 126.6, 124.5, 113.3 (d,  $J = 17.7$  Hz), 62.6, 52.9, 52.8, 48.5, 44.8 (d,  $J = 27.4$  Hz), 41.4, 36.5 (d,  $J = 4.4$  Hz) ppm; HRMS (ESI) calcd for  $\text{C}_{26}\text{H}_{24}\text{ClKFO}_6$   $[\text{M}+\text{K}]^+$  525.0877, found 525.0887.

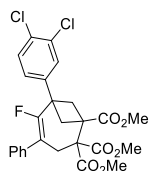

**Trimethyl 6-(3,4-dichlorophenyl)-5-fluoro-4-phenylbicyclo[4.1.1]oct-4-ene-1,2,2-tricarboxylate**

(**3ha**): Colorless oil (78%, 81.3 mg);  $R_f = 0.3$  (petroleum ether/EtOAc = 3/1);  $^1\text{H NMR}$  (400 MHz,  $\text{CDCl}_3$ ):  $\delta = 7.45\text{--}7.42$  (m, 3H), 7.34–7.30 (m, 2H), 7.28 (d,  $J = 2.0$  Hz, 1H), 7.25–7.21 (m, 1H), 7.04–7.01 (m, 1H), 3.79 (s, 6H), 3.72 (s, 3H), 3.54 (d,  $J = 4.8$  Hz, 2H), 3.29–3.26 (m, 2H), 3.05–3.01 (m,

2H);  $^{19}\text{F}$  NMR (376 MHz,  $\text{CDCl}_3$ ):  $\delta = -98.30$  (s);  $^{13}\text{C}$  NMR (100 MHz,  $\text{CDCl}_3$ ):  $\delta = 173.1, 171.1, 159.0$  (d,  $J = 258.8$  Hz),  $143.4$  (d,  $J = 4.7$  Hz),  $137.9, 132.4, 130.9, 130.3, 128.6$  (d,  $J = 3.4$  Hz),  $128.5, 128.1, 127.2, 125.8, 113.6$  (d,  $J = 17.4$  Hz),  $62.9, 52.9, 52.8, 48.4, 44.5$  (d,  $J = 27.4$  Hz),  $41.4, 36.6$  (d,  $J = 4.6$  Hz) ppm; HRMS (ESI) calcd for  $\text{C}_{26}\text{H}_{24}\text{Cl}_2\text{FO}_6$   $[\text{M}+\text{H}]^+$  521.0929, found 521.0914.

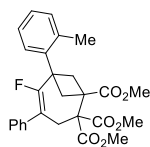

**Trimethyl 5-fluoro-4-phenyl-6-(*o*-tolyl)bicyclo[4.1.1]oct-4-ene-1,2,2-tricarboxylate (3ia):** Colorless oil (53%, 49.5 mg);  $R_f = 0.3$  (petroleum ether/EtOAc = 3/1);  $^1\text{H}$  NMR (400 MHz,  $\text{CDCl}_3$ ):  $\delta = 7.40$ - $7.37$  (m, 2H),  $7.26$ - $7.22$  (m, 2H),  $7.18$ - $7.05$  (m, 5H),  $3.76$  (s, 3H),  $3.71$  (s, 3H),  $3.63$ - $3.57$  (m, 5H),  $3.43$ - $3.37$  (m, 2H),  $3.01$  (dd,  $J = 12.4, 3.6$  Hz, 1H),  $2.62$  (dd,  $J = 12.2, 6.4$  Hz, 1H),  $2.25$  (s, 3H);  $^{19}\text{F}$  NMR (376 MHz,  $\text{CDCl}_3$ ):  $\delta = -98.40$  (s);  $^{13}\text{C}$  NMR (100 MHz,  $\text{CDCl}_3$ ):  $\delta = 173.5, 172.0, 170.5, 159.8$  (d,  $J = 258.2$  Hz),  $141.0$  (d,  $J = 4.7$  Hz),  $138.4, 136.1, 130.6, 128.6$  (d,  $J = 3.3$  Hz),  $128.0, 127.1, 127.0, 126.4, 125.7, 113.0$  (d,  $J = 18.1$  Hz),  $62.8, 52.82, 52.76, 52.66, 48.4, 45.6$  (d,  $J = 28.4$  Hz),  $42.2, 40.9, 36.5$  (d,  $J = 4.7$  Hz),  $20.3$  ppm; HRMS (ESI) calcd for  $\text{C}_{27}\text{H}_{28}\text{FO}_6$   $[\text{M}+\text{H}]^+$  467.1864, found 467.1869.

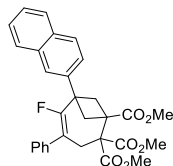

**Trimethyl 5-fluoro-6-(naphthalen-2-yl)-4-phenylbicyclo[4.1.1]oct-4-ene-1,2,2-tricarboxylate (3ja):** Colorless oil (68%, 68.3 mg);  $R_f = 0.3$  (petroleum ether/EtOAc = 3/1);  $^1\text{H}$  NMR (400 MHz,  $\text{CDCl}_3$ ):  $\delta = 7.87$ - $7.83$  (m, 3H),  $7.66$  (s, 1H),  $7.51$ - $7.47$  (m, 4H),  $7.34$ - $7.30$  (m, 3H),  $7.25$ - $7.21$  (m, 1H),  $3.83$  (s, 6H),  $3.70$  (s, 3H),  $3.61$  (d,  $J = 4.8$  Hz, 2H),  $3.47$ - $3.44$  (m, 2H),  $3.17$ - $3.12$  (m, 2H);  $^{19}\text{F}$  NMR (376 MHz,  $\text{CDCl}_3$ ):  $\delta = -97.51$  (s);  $^{13}\text{C}$  NMR (100 MHz,  $\text{CDCl}_3$ ):  $\delta = 173.4, 171.2, 160.1$  (d,  $J = 258.9$  Hz),  $140.7$  (d,  $J = 3.8$  Hz),  $138.2, 133.0, 132.2, 128.7$  (d,  $J = 3.3$  Hz),  $128.0, 127.7, 127.6, 127.0, 126.2, 125.8, 124.7, 124.6, 113.2$  (d,  $J = 17.4$  Hz),  $62.8, 52.8, 52.7, 48.6, 45.2$  (d,  $J = 27.1$  Hz),  $41.5, 36.6$  (d,  $J = 3.2$  Hz) ppm; HRMS (ESI) calcd for  $\text{C}_{30}\text{H}_{28}\text{FO}_6$   $[\text{M}+\text{H}]^+$  503.1864, found 503.1861.

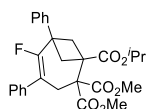

**1-Isopropyl 2,2-dimethyl 5-fluoro-4,6-diphenylbicyclo[4.1.1]oct-4-ene-1,2,2-tricarboxylate (3ka):** White solid (82%, 78.8 mg); m.p.:  $131$ - $132$  °C;  $R_f = 0.3$  (petroleum ether/EtOAc = 5/1);  $^1\text{H}$  NMR (400

MHz, CDCl<sub>3</sub>):  $\delta$  = 7.49-7.47 (m, 2H), 7.39-7.27 (m, 5H), 7.24-7.19 (m, 3H), 5.08-4.99 (m, 1H), 3.80 (s, 6H), 3.56 (d,  $J$  = 4.8 Hz, 2H), 3.33-3.29 (m, 2H), 3.05-3.01 (m, 2H), 1.22 (d,  $J$  = 6.4 Hz, 6H); <sup>19</sup>F NMR (376 MHz, CDCl<sub>3</sub>):  $\delta$  = -97.53 (s); <sup>13</sup>C NMR (100 MHz, CDCl<sub>3</sub>):  $\delta$  = 172.6, 171.2, 160.2 (d,  $J$  = 259.0 Hz), 143.3 (d,  $J$  = 4.9 Hz), 138.3, 128.7 (d,  $J$  = 3.6 Hz), 128.1, 127.9, 126.9, 126.6, 126.1, 112.9 (d,  $J$  = 17.9 Hz), 69.1, 62.8, 52.6, 48.5, 44.9 (d,  $J$  = 27.5 Hz), 41.4, 36.7 (d,  $J$  = 4.6 Hz), 21.5 ppm; HRMS (ESI) calcd for C<sub>28</sub>H<sub>30</sub>FO<sub>6</sub> [M+H]<sup>+</sup> 481.2021, found 481.2030.

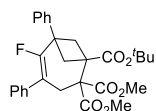

**1-(*Tert*-butyl) 2,2-dimethyl 5-fluoro-4,6-diphenylbicyclo[4.1.1]oct-4-ene-1,2,2-tricarboxylate (3la):**

White solid (91%, 90.1 mg); m.p.: 129-130 °C;  $R_f$  = 0.5 (petroleum ether/EtOAc = 3/1); <sup>1</sup>H NMR (400 MHz, CDCl<sub>3</sub>):  $\delta$  = 7.48-7.46 (m, 2H), 7.38-7.26 (m, 5H), 7.23-7.18 (m, 3H), 3.79 (s, 6H), 3.55 (d,  $J$  = 4.8 Hz, 2H), 3.29-3.25 (m, 2H), 3.03-2.98 (m, 2H), 1.43 (s, 9H); <sup>19</sup>F NMR (376 MHz, CDCl<sub>3</sub>):  $\delta$  = -97.64 (s); <sup>13</sup>C NMR (100 MHz, CDCl<sub>3</sub>):  $\delta$  = 172.3, 171.2, 160.4 (d,  $J$  = 259.0 Hz), 143.4 (d,  $J$  = 4.9 Hz), 138.4, 128.7 (d,  $J$  = 3.5 Hz), 128.1, 127.9, 126.9, 126.6, 126.1, 112.9 (d,  $J$  = 17.9 Hz), 81.7, 62.7, 52.5, 49.0, 44.8 (d,  $J$  = 27.0 Hz), 41.5, 36.9 (d,  $J$  = 4.5 Hz), 27.7 ppm; HRMS (ESI) calcd for C<sub>29</sub>H<sub>31</sub>KFO<sub>6</sub> [M+K]<sup>+</sup> 533.1736, found 533.1746.

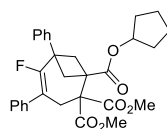

**1-Cyclopentyl 2,2-dimethyl 5-fluoro-4,6-diphenylbicyclo[4.1.1]oct-4-ene-1,2,2-tricarboxylate (3ma):**

White solid (87%, 88.2 mg); m.p.: 121-122 °C;  $R_f$  = 0.3 (petroleum ether/EtOAc = 3/1); <sup>1</sup>H NMR (400 MHz, CDCl<sub>3</sub>):  $\delta$  = 7.53-7.50 (m, 2H), 7.43-7.28 (m, 6H), 7.25-7.23 (m, 2H), 5.24-5.21 (m, 1H), 3.84 (s, 6H), 3.60 (d,  $J$  = 4.8 Hz, 2H), 3.35-3.31 (m, 2H), 3.09-3.04 (m, 2H), 1.91-1.85 (m, 2H), 1.73-1.60 (m, 6H); <sup>19</sup>F NMR (376 MHz, CDCl<sub>3</sub>):  $\delta$  = -98.21 (s); <sup>13</sup>C NMR (100 MHz, CDCl<sub>3</sub>):  $\delta$  = 172.9, 171.1, 160.3 (d,  $J$  = 258.9 Hz), 143.3, (d,  $J$  = 4.5 Hz), 138.3, 128.7 (d,  $J$  = 3.1 Hz), 128.2, 128.0, 126.9, 126.6, 126.0, 113.0 (d,  $J$  = 17.9 Hz), 78.5, 62.7, 52.6, 48.4, 44.9 (d,  $J$  = 27.5 Hz), 41.4, 36.8 (d,  $J$  = 4.1 Hz), 32.3, 23.6 ppm; HRMS (ESI) calcd for C<sub>30</sub>H<sub>32</sub>FO<sub>6</sub> [M+H]<sup>+</sup> 507.2177, found 507.2182.

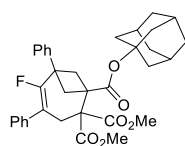



**1-(Adamantan-1-yl) 2,2-dimethyl 5-fluoro-4,6-diphenylbicyclo[4.1.1]oct-4-ene-1,2,2-tricarboxylate (3na):** White solid (84%, 96.2 mg); m.p.: 170-171 °C;  $R_f = 0.5$  (petroleum ether/EtOAc = 3/1);  $^1\text{H}$  NMR (400 MHz,  $\text{CDCl}_3$ ):  $\delta = 7.48\text{-}7.45$  (m, 2H), 7.37-7.26 (m, 5H), 7.23-7.17 (m, 3H), 3.80 (s, 6H), 3.52 (d,  $J = 5.2$  Hz, 2H), 3.29-3.25 (m, 2H), 3.02-2.97 (m, 2H), 2.15 (s, 3H), 2.08 (s, 6H), 1.64 (s, 6H);  $^{19}\text{F}$  NMR (376 MHz,  $\text{CDCl}_3$ ):  $\delta = -97.66$  (s);  $^{13}\text{C}$  NMR (100 MHz,  $\text{CDCl}_3$ ):  $\delta = 172.0, 171.2, 160.4$  (d,  $J = 259.5$  Hz), 143.4 (d,  $J = 5.0$  Hz), 138.4, 128.7 (d,  $J = 3.6$  Hz), 128.1, 127.9, 126.9, 126.5, 126.1, 112.9 (d,  $J = 18.0$  Hz), 81.8, 62.7, 52.6, 49.1, 44.8 (d,  $J = 27.0$  Hz), 41.6, 40.9, 36.8 (d,  $J = 4.7$  Hz), 36.0, 30.7 ppm; HRMS (ESI) calcd for  $\text{C}_{35}\text{H}_{38}\text{FO}_6$   $[\text{M}+\text{H}]^+$  573.2647, found 573.2651.

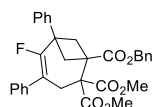

**1-Benzyl 2,2-dimethyl 5-fluoro-4,6-diphenylbicyclo[4.1.1]oct-4-ene-1,2,2-tricarboxylate (3oa):** Colorless oil (94%, 95.5 mg);  $R_f = 0.3$  (petroleum ether/EtOAc = 3/1);  $^1\text{H}$  NMR (400 MHz,  $\text{CDCl}_3$ ):  $\delta = 7.51\text{-}7.49$  (m, 2H), 7.41-7.29 (m, 10H), 7.26-7.21 (m, 3H), 5.19 (s, 2H), 3.70 (s, 6H), 3.59 (d,  $J = 4.8$  Hz, 2H), 3.43-3.39 (m, 2H), 3.11-3.07 (m, 2H);  $^{19}\text{F}$  NMR (376 MHz,  $\text{CDCl}_3$ ):  $\delta = -98.29$  (s);  $^{13}\text{C}$  NMR (100 MHz,  $\text{CDCl}_3$ ):  $\delta = 172.9, 171.0, 160.1$  (d,  $J = 259.6$  Hz), 143.2 (d,  $J = 4.8$  Hz), 138.2, 135.6, 128.7 (d,  $J = 3.5$  Hz), 128.4, 128.2, 128.1, 127.9, 126.9, 126.7, 126.1, 113.0 (d,  $J = 18.1$  Hz), 67.1, 62.7, 52.6, 48.5, 44.9 (d,  $J = 27.7$  Hz), 41.4, 36.6 (d,  $J = 4.8$  Hz) ppm; HRMS (ESI) calcd for  $\text{C}_{32}\text{H}_{30}\text{FO}_6$   $[\text{M}+\text{H}]^+$  529.2021, found 529.2014.

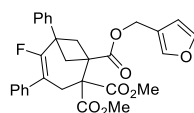

**1-(Furan-3-ylmethyl) 2,2-dimethyl 5-fluoro-4,6-diphenylbicyclo[4.1.1]oct-4-ene-1,2,2-tricarboxylate (3pa):** Colorless oil (65%, 69.5 mg);  $R_f = 0.3$  (petroleum ether/EtOAc = 3/1);  $^1\text{H}$  NMR (400 MHz,  $\text{CDCl}_3$ ):  $\delta = 7.49\text{-}7.46$  (m, 2H), 7.41-7.28 (m, 6H), 7.24-7.17 (m, 3H), 6.40-6.34 (m, 2H), 5.10 (s, 2H), 3.72 (s, 6H), 3.55 (d,  $J = 4.8$  Hz, 2H), 3.36-3.31 (m, 2H), 3.06-3.02 (m, 2H);  $^{19}\text{F}$  NMR (376 MHz,  $\text{CDCl}_3$ ):  $\delta = -97.55$  (s);  $^{13}\text{C}$  NMR (100 MHz,  $\text{CDCl}_3$ ):  $\delta = 172.8, 171.0, 160.1$  (d,  $J = 258.8$  Hz), 149.0, 143.2 (d,  $J = 4.8$  Hz), 143.1, 138.2, 128.7 (d,  $J = 3.4$  Hz), 128.1, 128.0, 126.9, 126.7, 126.1, 112.9 (d,  $J = 18.0$  Hz), 110.8, 110.5, 62.8, 59.0, 52.7, 48.4, 44.9 (d,  $J = 27.7$  Hz), 41.3, 36.6 (d,  $J = 4.6$  Hz) ppm; HRMS (ESI) calcd for  $\text{C}_{30}\text{H}_{27}\text{KFO}_7$   $[\text{M}+\text{K}]^+$  557.1372, found 557.1375.

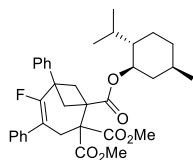

**1-(1R,2S,5R)-2-isopropyl-5-methylcyclohexyl 2,2-dimethyl 5-fluoro-4,6-diphenylbicyclo[4.1.1]oct-4-ene-1,2,2-tricarboxylate (3qa):** Colorless oil (92%, 105.6 mg);  $R_f = 0.3$  (petroleum ether/EtOAc = 5/1);  $^1\text{H NMR}$  (400 MHz,  $\text{CDCl}_3$ ):  $\delta = 7.50\text{--}7.47$  (m, 2H), 7.39–7.27 (m, 5H), 7.23–7.18 (m, 3H), 4.71 (td,  $J = 10.8, 4.0$  Hz, 1H), 3.80 (s, 3H), 3.77 (s, 3H), 3.55 (d,  $J = 4.8$  Hz, 2H), 3.36–3.33 (m, 1H), 3.28–3.24 (m, 1H), 3.05–3.97 (m, 2H), 1.98–1.93 (m, 1H), 1.84–1.77 (m, 1H), 1.69–1.64 (m, 2H), 1.50–1.43 (m, 1H), 1.40–1.33 (m, 1H), 1.06–0.98 (m, 1H), 0.92–0.83 (m, 8H), 0.74 (d,  $J = 7.2$  Hz, 3H);  $^{19}\text{F NMR}$  (376 MHz,  $\text{CDCl}_3$ ):  $\delta = -97.66$  (s);  $^{13}\text{C NMR}$  (100 MHz,  $\text{CDCl}_3$ ):  $\delta = 172.4, 171.24, 171.19, 160.2$  (d,  $J = 258.9$  Hz), 143.3 (d,  $J = 5.1$  Hz), 138.3, 128.7 (d,  $J = 3.6$  Hz), 128.2, 128.0, 126.9, 126.6, 126.1, 113.0 (d,  $J = 17.9$  Hz), 75.6, 62.8, 52.7, 52.6, 48.6, 46.8, 44.9 (d,  $J = 27.6$  Hz), 41.6, 41.1, 40.3, 36.8 (d,  $J = 4.1$  Hz), 34.1, 31.3, 26.0, 23.2, 21.9, 20.7, 16.1 ppm; HRMS (ESI) calcd for  $\text{C}_{35}\text{H}_{42}\text{FO}_6$   $[\text{M}+\text{H}]^+$  577.2960, found 577.2961.

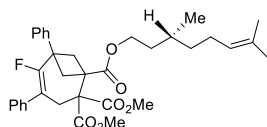

**(R)-1-(3,7-dimethyloct-6-en-1-yl) 2,2-dimethyl 5-fluoro-4,6-diphenylbicyclo[4.1.1]oct-4-ene-1,2,2-tricarboxylate (3ra):** Colorless oil (88%, 101.8 mg);  $R_f = 0.3$  (petroleum ether/EtOAc = 5/1);  $^1\text{H NMR}$  (400 MHz,  $\text{CDCl}_3$ ):  $\delta = 7.48\text{--}7.45$  (m, 2H), 7.39–7.27 (m, 5H), 7.24–7.18 (m, 3H), 5.08–5.04 (m, 1H), 4.16–4.13 (m, 2H), 3.80 (s, 6H), 3.56 (d,  $J = 4.8$  Hz, 2H), 3.34–3.30 (m, 2H), 3.05–3.01 (m, 2H), 1.97–1.84 (m, 2H), 1.69–1.59 (m, 7H), 1.50–1.39 (m, 2H), 1.32–1.27 (m, 1H), 1.19–1.10 (m, 1H), 0.88–0.86 (m, 3H);  $^{19}\text{F NMR}$  (376 MHz,  $\text{CDCl}_3$ ):  $\delta = -97.61$  (s);  $^{13}\text{C NMR}$  (100 MHz,  $\text{CDCl}_3$ ):  $\delta = 173.0, 171.2, 160.2$  (d,  $J = 259.5$  Hz), 143.3 (d,  $J = 5.4$  Hz), 138.3, 131.3, 128.7 (d,  $J = 2.8$  Hz), 128.2, 128.0, 127.0, 126.7, 126.1, 124.4, 113.0 (d,  $J = 18.0$  Hz), 64.3, 62.7, 52.8, 48.6, 45.0 (d,  $J = 27.5$  Hz), 41.5, 36.9, 36.7 (d,  $J = 4.8$  Hz), 35.2, 29.5, 25.7, 25.4, 19.3, 17.6 ppm; HRMS (ESI) calcd for  $\text{C}_{35}\text{H}_{42}\text{FO}_6$   $[\text{M}+\text{H}]^+$  577.2960, found 577.2961.

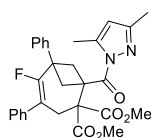

**Dimethyl 1-(3,5-dimethyl-1H-pyrazole-1-carbonyl)-5-fluoro-4,6-diphenylbicyclo[4.1.1]oct-**

**t-4-ene-2,2-dicarboxylate (3sa):** Colorless oil (58%, 59.9 mg);  $R_f = 0.2$  (petroleum ether/EtOAc = 3/1);  $^1\text{H NMR}$  (400 MHz,  $\text{CDCl}_3$ ):  $\delta = 7.45\text{--}7.42$  (m, 2H), 7.34–7.30 (m, 4H), 7.24–7.20 (m, 4H), 5.85 (s, 1H), 3.69 (d,  $J = 4.8$  Hz, 2H), 3.60 (s, 6H), 3.50–3.46 (m, 2H), 3.39–3.34 (m, 2H), 2.52 (s, 3H), 2.04 (s, 3H);  $^{19}\text{F NMR}$  (376 MHz,  $\text{CDCl}_3$ ):  $\delta = -98.10$  (s);  $^{13}\text{C NMR}$  (100 MHz,  $\text{CDCl}_3$ ):  $\delta = 173.4, 169.9, 160.4$  (d,  $J = 259.9$  Hz), 150.9, 144.6, 143.5 (d,  $J = 4.7$  Hz), 138.9, 128.7 (d,  $J = 2.6$  Hz), 128.01, 127.96, 126.8, 126.5, 126.4, 112.6 (d,  $J = 17.2$  Hz), 110.1, 64.1, 52.8, 51.2, 44.8 (d,  $J = 27.5$  Hz), 42.7, 35.7 (d,  $J = 4.3$  Hz), 14.4, 13.5 ppm; HRMS (ESI) calcd for  $\text{C}_{30}\text{H}_{29}\text{LiN}_2\text{FO}_5$   $[\text{M}+\text{Li}]^+$  523.2215, found 523.2224.

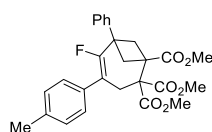

**Trimethyl 5-fluoro-6-phenyl-4-(p-tolyl)bicyclo[4.1.1]oct-4-ene-1,2,2-tricarboxylate (3ab):** White solid (92%, 86.0 mg); m.p.: 140–141 °C;  $R_f = 0.3$  (petroleum ether/EtOAc = 3/1);  $^1\text{H NMR}$  (400 MHz,  $\text{CDCl}_3$ ):  $\delta = 7.40\text{--}7.35$  (m, 4H), 7.31–7.27 (m, 1H), 7.22–7.20 (m, 2H), 7.15–7.12 (m, 2H), 3.81 (s, 6H), 3.71 (s, 3H), 3.56 (d,  $J = 4.8$  Hz, 2H), 3.37–3.33 (m, 2H), 3.08–3.03 (m, 2H), 2.33 (s, 3H);  $^{19}\text{F NMR}$  (376 MHz,  $\text{CDCl}_3$ ):  $\delta = -97.97$  (s);  $^{13}\text{C NMR}$  (100 MHz,  $\text{CDCl}_3$ ):  $\delta = 173.4, 171.2, 159.9$  (d,  $J = 258.1$  Hz), 143.4 (d,  $J = 4.9$  Hz), 136.6, 135.3, 128.7, 128.5 (d,  $J = 3.5$  Hz), 128.2, 126.7, 126.2, 112.7 (d,  $J = 17.9$  Hz), 62.7, 52.8, 52.7, 48.6, 45.0 (d,  $J = 27.5$  Hz), 41.4, 36.6 (d,  $J = 4.7$  Hz), 21.1 ppm; HRMS (ESI) calcd for  $\text{C}_{27}\text{H}_{28}\text{FO}_6$   $[\text{M}+\text{H}]^+$  467.1864, found 467.1867.

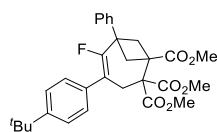

**Trimethyl 4-(4-(tert-butyl)phenyl)-5-fluoro-6-phenylbicyclo[4.1.1]oct-4-ene-1,2,2-tricarboxylate (3ac):** Colorless oil (92%, 93.6 mg);  $R_f = 0.3$  (petroleum ether/EtOAc = 3/1);  $^1\text{H NMR}$  (400 MHz,  $\text{CDCl}_3$ ):  $\delta = 7.45\text{--}7.35$  (m, 6H), 7.31–7.28 (m, 1H), 7.24–7.21 (m, 2H), 3.82 (s, 6H), 3.72 (s, 3H), 3.59 (d,  $J = 4.8$  Hz, 2H), 3.38–3.34 (m, 2H), 3.09–3.05 (m, 2H), 1.32 (s, 9H);  $^{19}\text{F NMR}$  (376 MHz,  $\text{CDCl}_3$ ):  $\delta = -97.88$  (s);  $^{13}\text{C NMR}$  (100 MHz,  $\text{CDCl}_3$ ):  $\delta = 173.4, 171.2, 159.9$  (d,  $J = 258.8$  Hz), 149.8, 143.4 (d,  $J = 5.0$  Hz), 135.1, 128.2 (d,  $J = 3.5$  Hz), 128.1, 126.6, 126.1, 124.8, 112.6 (d,  $J = 17.3$  Hz), 62.7, 52.8, 52.6, 48.5, 45.0 (d,  $J = 27.8$  Hz), 41.4, 36.4 (d,  $J = 4.7$  Hz), 34.4, 31.2 ppm; HRMS (ESI) calcd for  $\text{C}_{30}\text{H}_{34}\text{FO}_6$   $[\text{M}+\text{H}]^+$  509.2334, found 509.2347.

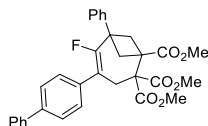

**Trimethyl 4-([1,1'-biphenyl]-4-yl)-5-fluoro-6-phenylbicyclo[4.1.1]oct-4-ene-1,2,2-tricarboxylate**

**(3ad):** Colorless oil (89%, 94.1 mg);  $R_f = 0.3$  (petroleum ether/EtOAc = 3/1);  $^1\text{H NMR}$  (400 MHz,  $\text{CDCl}_3$ ):  $\delta = 7.64\text{--}7.59$  (m, 6H), 7.48–7.27 (m, 7H), 7.24 (s, 1H), 3.85 (s, 6H), 3.74 (s, 3H), 3.64 (d,  $J = 4.8$  Hz, 2H), 3.42–3.38 (m, 2H), 3.13–3.08 (m, 2H);  $^{19}\text{F NMR}$  (376 MHz,  $\text{CDCl}_3$ ):  $\delta = -97.05$  (s);  $^{13}\text{C NMR}$  (100 MHz,  $\text{CDCl}_3$ ):  $\delta = 173.4, 171.2, 160.3$  (d,  $J = 259.3$  Hz), 143.3 (d,  $J = 4.7$  Hz), 140.7, 139.7, 137.2, 129.1 (d,  $J = 3.6$  Hz), 128.6, 128.2, 127.1, 126.9, 126.7, 126.6, 126.1, 112.5 (d,  $J = 17.3$  Hz), 62.7, 52.8, 52.7, 48.5, 45.1 (d,  $J = 27.6$  Hz), 41.4, 36.4 (d,  $J = 4.8$  Hz) ppm; HRMS (ESI) calcd for  $\text{C}_{32}\text{H}_{30}\text{FO}_6$   $[\text{M}+\text{H}]^+$  529.2021, found 529.2025.

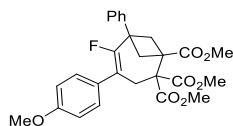

**Trimethyl 5-fluoro-4-(4-methoxyphenyl)-6-phenylbicyclo[4.1.1]oct-4-ene-1,2,2-tricarboxylate**

**(3ae):** Colorless oil (56%, 54.0 mg);  $R_f = 0.3$  (petroleum ether/EtOAc = 3/1);  $^1\text{H NMR}$  (400 MHz,  $\text{CDCl}_3$ ):  $\delta = 7.42\text{--}7.36$  (m, 4H), 7.30–7.27 (m, 1H), 7.21–7.19 (m, 2H), 6.87–6.83 (m, 2H), 3.80 (s, 6H), 3.79 (s, 3H), 3.70 (s, 3H), 3.54 (d,  $J = 4.8$  Hz, 2H), 3.35–3.31 (m, 2H), 3.06–3.01 (m, 2H);  $^{19}\text{F NMR}$  (376 MHz,  $\text{CDCl}_3$ ):  $\delta = -99.29$  (s);  $^{13}\text{C NMR}$  (100 MHz,  $\text{CDCl}_3$ ):  $\delta = 173.5, 171.3, 159.7$  (d,  $J = 257.1$  Hz), 158.4, 143.5 (d,  $J = 4.8$  Hz), 130.5, 129.9 (d,  $J = 3.4$  Hz), 128.2, 126.7, 126.2, 113.4, 112.4 (d,  $J = 18.0$  Hz), 62.8, 55.2, 52.8, 52.7, 48.6, 45.0 (d,  $J = 27.7$  Hz), 41.4, 36.7 (d,  $J = 4.6$  Hz) ppm; HRMS (ESI) calcd for  $\text{C}_{27}\text{H}_{27}\text{KFO}_7$   $[\text{M}+\text{K}]^+$  521.1372, found 521.1361.

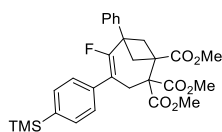

**Trimethyl 5-fluoro-6-phenyl-4-(4-(trimethylsilyl)phenyl)bicyclo[4.1.1]oct-4-ene-1,2,2-tricarboxylate (3af):**

Colorless oil (81%, 85.0 mg);  $R_f = 0.3$  (petroleum ether/EtOAc = 3/1);  $^1\text{H NMR}$  (400 MHz,  $\text{CDCl}_3$ ):  $\delta = 7.49\text{--}7.43$  (m, 4H), 7.39–7.36 (m, 2H), 7.30–7.26 (m, 1H), 7.21–7.19 (m, 2H), 3.81 (s, 6H), 3.71 (s, 3H), 3.57 (d,  $J = 4.8$  Hz, 2H), 3.36–3.32 (m, 2H), 3.07–3.03 (m, 2H), 0.25 (s, 9H);  $^{19}\text{F NMR}$  (376 MHz,  $\text{CDCl}_3$ ):  $\delta = -97.29$  (s);  $^{13}\text{C NMR}$  (100 MHz,  $\text{CDCl}_3$ ):  $\delta = 173.5, 171.2, 160.3$  (d,  $J = 259.3$  Hz), 143.3 (d,  $J = 4.9$  Hz), 139.1, 138.7, 133.0, 128.2, 127.9 (d,  $J = 3.1$  Hz), 126.7, 126.2,

112.8 (d,  $J = 18.0$  Hz), 62.7, 52.8, 52.7, 48.6, 45.0 (d,  $J = 27.7$  Hz), 41.4, 36.4 (d,  $J = 4.7$  Hz), -1.20 ppm; HRMS (ESI) calcd for  $C_{29}H_{33}SiKFO_6$   $[M+K]^+$  563.1662, found 563.1666.

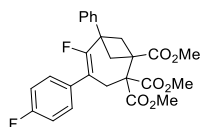

**Trimethyl 5-fluoro-4-(4-fluorophenyl)-6-phenylbicyclo[4.1.1]oct-4-ene-1,2,2-tricarboxylate (3ag):**

White solid (94%, 88.3 mg); m.p.: 125-126 °C;  $R_f = 0.3$  (petroleum ether/EtOAc = 3/1);  $^1H$  NMR (400 MHz,  $CDCl_3$ ):  $\delta = 7.47$ -7.43 (m, 2H), 7.40-7.36 (m, 2H), 7.31-7.27 (m, 1H), 7.20-7.18 (m, 2H), 7.02-6.97 (m, 2H), 3.80 (s, 6H), 3.71 (s, 3H), 3.52 (d,  $J = 4.8$  Hz, 2H), 3.36-3.32 (m, 2H), 3.05-3.01 (m, 2H);  $^{19}F$  NMR (376 MHz,  $CDCl_3$ ):  $\delta = -97.47$  (s), -115.11 (s);  $^{13}C$  NMR (100 MHz,  $CDCl_3$ ):  $\delta = 173.3$ , 171.2, 161.6 (d,  $J = 244.5$  Hz), 160.2 (d,  $J = 259.0$  Hz), 143.2 (d,  $J = 5.0$  Hz), 134.1 (d,  $J = 3.7$  Hz), 130.5 (dd,  $J = 7.8$ , 3.7 Hz), 128.2, 126.8, 126.1, 114.8 (d,  $J = 21.2$  Hz), 112.1 (d,  $J = 17.8$  Hz), 62.8, 52.9, 52.7, 48.5, 45.0 (d,  $J = 27.6$  Hz), 41.4, 36.6 (d,  $J = 4.0$  Hz) ppm; HRMS (ESI) calcd for  $C_{26}H_{24}KF_2O_6$   $[M+K]^+$  509.1173, found 509.1199.

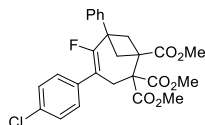

**Trimethyl 4-(4-chlorophenyl)-5-fluoro-6-phenylbicyclo[4.1.1]oct-4-ene-1,2,2-tricarboxylate (3ah):**

White solid (90%, 87.8 mg); m.p.: 137-138 °C;  $R_f = 0.3$  (petroleum ether/EtOAc = 3/1);  $^1H$  NMR (400 MHz,  $CDCl_3$ ):  $\delta = 7.39$ -7.32 (m, 4H), 7.24-7.21 (m, 3H), 7.16-7.13 (m, 2H), 3.76 (s, 6H), 3.66 (s, 3H), 3.47 (d,  $J = 4.8$  Hz, 2H), 3.32-3.28 (m, 2H), 3.01-2.96 (m, 2H);  $^{19}F$  NMR (376 MHz,  $CDCl_3$ ):  $\delta = -97.41$  (s);  $^{13}C$  NMR (100 MHz,  $CDCl_3$ ):  $\delta = 173.3$ , 171.2, 160.5 (d,  $J = 260.4$  Hz), 143.1 (d,  $J = 4.8$  Hz), 136.7, 132.6, 130.1 (d,  $J = 3.4$  Hz), 128.2, 128.1, 126.8, 126.1, 112.0 (d,  $J = 17.9$  Hz), 62.7, 52.9, 52.7, 49.5, 45.0 (d,  $J = 27.1$  Hz), 41.3, 36.4 (d,  $J = 4.3$  Hz) ppm; HRMS (ESI) calcd for  $C_{26}H_{25}ClFO_6$   $[M+H]^+$  487.1318, found 487.1322.

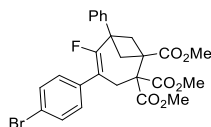

**Trimethyl 4-(4-bromophenyl)-5-fluoro-6-phenylbicyclo[4.1.1]oct-4-ene-1,2,2-tricarboxylate (3ai):**

Colorless oil (97%, 94.0 mg);  $R_f = 0.3$  (petroleum ether/EtOAc = 3/1);  $^1H$  NMR (400 MHz,  $CDCl_3$ ):  $\delta = 7.45$ -7.42 (m, 3H), 7.38-7.36 (m, 3H), 7.30-7.28 (m, 1H), 7.20-7.18 (m, 2H), 3.80 (s, 6H), 3.71 (s,

3H), 3.52 (d,  $J = 4.8$  Hz, 2H), 3.36-3.32 (m, 2H), 3.05-3.01 (m, 2H);  $^{19}\text{F}$  NMR (376 MHz,  $\text{CDCl}_3$ ):  $\delta = -96.55$  (s);  $^{13}\text{C}$  NMR (100 MHz,  $\text{CDCl}_3$ ):  $\delta = 173.2, 171.1, 160.5$  (d,  $J = 260.3$  Hz), 143.0 (d,  $J = 4.8$  Hz), 137.2, 131.1, 130.5 (d,  $J = 3.6$  Hz), 128.2, 126.8, 126.1, 120.9, 112.0 (d,  $J = 17.3$  Hz), 62.7, 52.9, 52.7, 48.5, 45.0 (d,  $J = 27.6$  Hz), 41.3, 36.3 (d,  $J = 4.5$  Hz) ppm; HRMS (ESI) calcd for  $\text{C}_{26}\text{H}_{25}\text{BrFO}_6$   $[\text{M}+\text{H}]^+$  531.0813, found 531.0824.

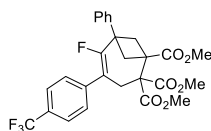

**Trimethyl 5-fluoro-6-phenyl-4-(4-(trifluoromethyl)phenyl)bicyclo[4.1.1]oct-4-ene-1,2,2-tricarboxylate (3aj):** Colorless oil (69%, 71.8 mg);  $R_f = 0.3$  (petroleum ether/EtOAc = 3/1);  $^1\text{H}$  NMR (400 MHz,  $\text{CDCl}_3$ ):  $\delta = 7.61$ -7.55 (m, 4H), 7.40-7.37 (m, 2H), 7.31-7.29 (m, 1H), 7.21-7.19 (m, 2H), 3.81 (s, 6H), 3.71 (s, 3H), 3.55 (d,  $J = 4.8$  Hz, 2H), 3.39-3.35 (m, 2H), 3.07-3.03 (m, 2H);  $^{19}\text{F}$  NMR (376 MHz,  $\text{CDCl}_3$ ):  $\delta = -62.41$  (s, 3F), -95.78 (s, 1F);  $^{13}\text{C}$  NMR (100 MHz,  $\text{CDCl}_3$ ):  $\delta = 173.2, 171.1, 161.2$  (d,  $J = 261.6$  Hz), 142.9 (d,  $J = 4.9$  Hz), 142.0, 129.1 (d,  $J = 3.7$  Hz), 128.9 (q,  $J = 33.2$  Hz), 128.3, 126.9, 126.2, 124.9 (q,  $J = 3.0$  Hz), 124.1 (q,  $J = 270.5$  Hz), 112.0 (d,  $J = 17.3$  Hz), 62.8, 52.9, 52.8, 48.5, 45.1 (d,  $J = 27.0$  Hz), 41.4, 36.3 (d,  $J = 4.5$  Hz) ppm; HRMS (ESI) calcd for  $\text{C}_{27}\text{H}_{24}\text{LiF}_4\text{O}_6$   $[\text{M}+\text{Li}]^+$  527.1664, found 527.1640.

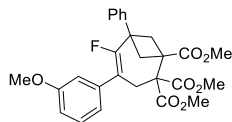

**Trimethyl 5-fluoro-4-(3-methoxyphenyl)-6-phenylbicyclo[4.1.1]oct-4-ene-1,2,2-tricarboxylate (3ak):** White solid (86%, 83.2 mg); m.p.: 139-140 °C;  $R_f = 0.3$  (petroleum ether/EtOAc = 3/1);  $^1\text{H}$  NMR (400 MHz,  $\text{CDCl}_3$ ):  $\delta = 7.40$ -7.36 (m, 2H), 7.30-7.28 (m, 1H), 7.23-7.19 (m, 3H), 7.05-7.03 (m, 2H), 6.80-6.77 (m, 1H), 3.81 (s, 6H), 3.80 (s, 3H), 3.71 (s, 3H), 3.56 (d,  $J = 4.8$  Hz, 2H), 3.36-3.32 (m, 2H), 3.08-3.03 (m, 2H);  $^{19}\text{F}$  NMR (376 MHz,  $\text{CDCl}_3$ ):  $\delta = -96.77$  (s);  $^{13}\text{C}$  NMR (100 MHz,  $\text{CDCl}_3$ ):  $\delta = 173.4, 171.2, 160.2$  (d,  $J = 259.6$  Hz), 159.2, 143.3 (d,  $J = 4.8$  Hz), 139.6, 128.9, 128.2, 126.7, 126.2, 121.2 (d,  $J = 3.1$  Hz), 114.2 (d,  $J = 3.2$  Hz), 112.9, 112.7, 62.7, 55.1, 52.8, 52.7, 48.6, 45.0 (d,  $J = 27.1$  Hz), 41.4, 36.5 (d,  $J = 4.7$  Hz) ppm; HRMS (ESI) calcd for  $\text{C}_{27}\text{H}_{27}\text{KFO}_7$   $[\text{M}+\text{K}]^+$  521.1372, found 521.1382.

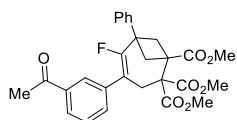

**Trimethyl 4-(3-acetylphenyl)-5-fluoro-6-phenylbicyclo[4.1.1]oct-4-ene-1,2,2-tricarboxylate (3al):**

White solid (89%, 88.5 mg); m.p.: 117-118 °C;  $R_f = 0.2$  (petroleum ether/EtOAc = 3/1);  $^1\text{H}$  NMR (400 MHz,  $\text{CDCl}_3$ ):  $\delta = 8.08$  (s, 1H), 7.82-7.80 (m, 1H), 7.67-7.64 (m, 1H), 7.42-7.35 (m, 3H), 7.30-7.27 (m, 1H), 7.20-7.18 (m, 2H), 3.82 (s, 6H), 3.70 (s, 3H), 3.56 (d,  $J = 4.8$  Hz, 2H), 3.37-3.33 (m, 2H), 3.08-3.03 (m, 2H), 2.60 (s, 3H);  $^{19}\text{F}$  NMR (376 MHz,  $\text{CDCl}_3$ ):  $\delta = -97.21$  (s);  $^{13}\text{C}$  NMR (100 MHz,  $\text{CDCl}_3$ ):  $\delta = 198.1, 173.3, 171.1, 160.9$  (d,  $J = 260.3$  Hz), 143.0 (d,  $J = 4.9$  Hz), 138.8, 137.0, 133.6, 133.56, 128.6 (d,  $J = 2.9$  Hz), 128.2, 126.9, 126.8, 126.2, 112.2 (d,  $J = 17.4$  Hz), 62.8, 52.9, 52.7, 48.6, 45.0 (d,  $J = 27.2$  Hz), 41.4, 36.4 (d,  $J = 4.4$  Hz), 26.6 ppm; HRMS (ESI) calcd for  $\text{C}_{28}\text{H}_{27}\text{NaFO}_7$   $[\text{M}+\text{Na}]^+$  517.1633, found 517.1639

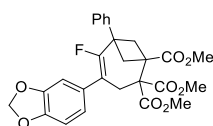

**Trimethyl 4-(benzo[d][1,3]dioxol-5-yl)-5-fluoro-6-phenylbicyclo[4.1.1]oct-4-ene-1,2,2-tri-**

**carboxylate (3am):** White solid (59%, 58.6 mg); m.p.: 142-143 °C;  $R_f = 0.3$  (petroleum ether/EtOAc = 3/1);  $^1\text{H}$  NMR (400 MHz,  $\text{CDCl}_3$ ):  $\delta = 7.39$ -7.35 (m, 2H), 7.30-7.27 (m, 1H), 7.19-7.17 (m, 2H), 6.98-6.92 (m, 2H), 6.76 (d,  $J = 8.0$  Hz, 1H), 5.91 (s, 2H), 3.80 (s, 6H), 3.70 (s, 3H), 3.51 (d,  $J = 4.8$  Hz, 2H), 3.34-3.30 (m, 2H), 3.04-2.99 (m, 2H);  $^{19}\text{F}$  NMR (376 MHz,  $\text{CDCl}_3$ ):  $\delta = -97.55$  (s);  $^{13}\text{C}$  NMR (100 MHz,  $\text{CDCl}_3$ ):  $\delta = 173.4, 171.2, 159.9$  (d,  $J = 258.3$  Hz), 147.2, 146.3, 143.3 (d,  $J = 5.2$  Hz), 132.0, 128.2, 126.7, 126.2, 122.2 (d,  $J = 3.4$  Hz), 112.6 (d,  $J = 17.8$  Hz), 109.4 (d,  $J = 3.8$  Hz), 107.8, 100.86, 62.7, 52.8, 52.7, 48.5, 45.0 (d,  $J = 27.8$  Hz), 41.4, 36.8 (d,  $J = 4.3$  Hz) ppm; HRMS (ESI) calcd for  $\text{C}_{27}\text{H}_{25}\text{KFO}_8$   $[\text{M}+\text{K}]^+$  535.1165, found 535.1171.

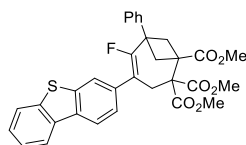

**Trimethyl 4-(dibenzo[b,d]thiophen-3-yl)-5-fluoro-6-phenylbicyclo[4.1.1]oct-4-ene-1,2,2-tri-**

**carboxylate (3an):** Colorless oil (63%, 74.2 mg);  $R_f = 0.3$  (petroleum ether/EtOAc = 3/1);  $^1\text{H}$  NMR (400 MHz,  $\text{CDCl}_3$ ):  $\delta = 8.31$  (s, 1H), 8.19-8.17 (m, 1H), 7.85-7.79 (m, 2H), 7.62-7.59 (m, 1H), 7.46-7.40 (m, 4H), 7.34-7.27 (m, 2H), 7.25-7.24 (m, 1H), 3.86 (s, 6H), 3.74 (s, 3H), 3.70 (d,  $J = 4.8$  Hz, 2H), 3.43-3.39 (m, 2H), 3.15-3.11 (m, 2H);  $^{19}\text{F}$  NMR (376 MHz,  $\text{CDCl}_3$ ):  $\delta = -97.30$  (s);  $^{13}\text{C}$  NMR (100 MHz,  $\text{CDCl}_3$ ):  $\delta = 173.4, 171.3, 160.4$  (d,  $J = 259.6$  Hz), 143.3 (d,  $J = 4.8$  Hz), 139.6, 138.0, 135.4 (d,  $J = 4.5$  Hz), 134.7, 128.2, 127.6, 126.8, 126.6, 126.2, 124.2, 122.7, 122.2, 121.8, 121.6, 112.8

(d,  $J = 17.4$  Hz), 62.9, 52.9, 52.7, 48.6, 45.1 (d,  $J = 27.5$  Hz), 41.5, 36.9 (d,  $J = 4.5$  Hz) ppm; HRMS (ESI) calcd for  $C_{32}H_{28}FO_6S$   $[M+H]^+$  559.1585, found 559.1588.

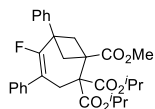

**2,2-Diisopropyl 1-methyl 5-fluoro-4,6-diphenylbicyclo[4.1.1]oct-4-ene-1,2,2-tricarboxylate (3ao):**

White solid (38%, 38.7 mg); m.p.: 106-107 °C;  $R_f = 0.4$  (petroleum ether/EtOAc = 3/1);  $^1H$  NMR (400 MHz,  $CDCl_3$ ):  $\delta = 7.52-7.49$  (m, 2H), 7.39-7.27 (m, 5H), 7.24-7.20 (m, 3H), 5.16-5.06 (m, 2H), 3.68 (s, 3H), 3.54 (d,  $J = 4.8$  Hz, 2H), 3.35-3.31 (m, 2H), 3.09-3.04 (m, 2H), 1.28 (d,  $J = 6.0$  Hz, 6H), 1.25 (d,  $J = 6.0$  Hz, 6H);  $^{19}F$  NMR (376 MHz,  $CDCl_3$ ):  $\delta = -97.81$  (s);  $^{13}C$  NMR (100 MHz,  $CDCl_3$ ):  $\delta = 173.5$ , 170.1, 160.3 (d,  $J = 258.9$  Hz), 143.5 (d,  $J = 4.9$  Hz), 138.5, 128.8 (d,  $J = 3.5$  Hz), 128.2, 127.9, 126.9, 126.6, 126.2, 112.9 (d,  $J = 17.7$  Hz), 69.4, 62.7, 52.4, 48.3, 44.9 (d,  $J = 27.7$  Hz), 41.5, 36.5 (d,  $J = 4.4$  Hz), 21.6, 21.5 ppm; HRMS (ESI) calcd for  $C_{30}H_{34}FO_6$   $[M+H]^+$  509.2334, found 509.2343.

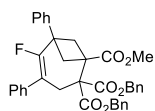

**2,2-Dibenzyl 1-methyl 5-fluoro-4,6-diphenylbicyclo[4.1.1]oct-4-ene-1,2,2-tricarboxylate (3ap):**

Colorless oil (85%, 102.7 mg);  $R_f = 0.3$  (petroleum ether/EtOAc = 3/1);  $^1H$  NMR (400 MHz,  $CDCl_3$ ):  $\delta = 7.45-7.43$  (m, 2H), 7.41-7.38 (m, 2H), 7.37-7.35 (m, 6H), 7.33-7.28 (m, 6H), 7.25-7.20 (m, 4H), 5.24 (s, 4H), 3.65 (d,  $J = 4.8$  Hz, 2H), 3.54 (s, 3H), 3.37-3.34 (m, 2H), 3.12-3.07 (m, 2H);  $^{19}F$  NMR (376 MHz,  $CDCl_3$ ):  $\delta = -97.25$  (s);  $^{13}C$  NMR (100 MHz,  $CDCl_3$ ):  $\delta = 173.4$ , 170.4, 160.3 (d,  $J = 259.3$  Hz), 143.2 (d,  $J = 4.9$  Hz), 138.1, 135.1, 128.7 (d,  $J = 3.2$  Hz), 128.4, 128.2, 128.22, 128.1, 127.9, 126.9, 126.7, 126.2, 112.7 (d,  $J = 17.3$  Hz), 67.7, 62.9, 52.4, 48.6, 44.9 (d,  $J = 27.7$  Hz), 41.4, 36.4 (d,  $J = 4.3$  Hz) ppm; HRMS (ESI) calcd for  $C_{38}H_{34}FO_6$   $[M+H]^+$  605.2334, found 605.2344.

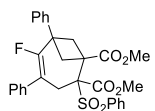

**Dimethyl 5-fluoro-4,6-diphenyl-2-(phenylsulfonyl)bicyclo[4.1.1]oct-4-ene-1,2-dicarboxylate (3aq):**

White solid (79%, 84.5 mg); m.p.: 92-93 °C;  $R_f = 0.3$  (petroleum ether/EtOAc = 3/1);  $^1H$  NMR (400 MHz,  $CDCl_3$ ):  $\delta = 7.92$  (d,  $J = 7.6$  Hz, 2H), 7.68-7.64 (m, 1H), 7.55-7.51 (m, 2H), 7.37-7.33 (m, 4H), 7.30-7.27 (m, 2H), 7.26-7.19 (m, 2H), 7.16-7.13 (m, 2H), 3.83 (s, 3H), 3.77 (dd,  $J = 16.8$ , 4.8 Hz, 1H), 3.71-3.67 (m, 4H), 3.39 (dd,  $J = 17.2$ , 1.0 Hz, 1H), 3.26 (dd,  $J = 12.8$ , 0.9 Hz, 1H), 3.17 (d,  $J = 12.0$  Hz, 1H), 3.09 (dd,  $J = 12.0$ , 5.6 Hz, 1H);  $^{19}F$  NMR (376 MHz,  $CDCl_3$ ):  $\delta = -97.70$  (s);  $^{13}C$  NMR (100 MHz,



CDCl<sub>3</sub>):  $\delta$  = 173.5, 167.4, 159.0 (d,  $J$  = 258.9 Hz), 142.8 (d,  $J$  = 5.0 Hz), 138.1, 137.4, 134.4, 130.6, 128.8, 128.5 (d,  $J$  = 3.1 Hz), 128.2, 128.0, 127.1, 126.8, 126.1, 111.9 (d,  $J$  = 19.1 Hz), 80.2, 53.2, 52.7, 47.4, 45.0, 44.2 (d,  $J$  = 27.7 Hz), 39.0, 35.2 (d,  $J$  = 4.7 Hz) ppm; HRMS (ESI) calcd for C<sub>30</sub>H<sub>28</sub>FO<sub>6</sub>S [M+H]<sup>+</sup> 535.1585, found 535.1580.

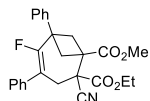

**2-Ethyl 1-methyl 2-cyano-5-fluoro-4,6-diphenylbicyclo[4.1.1]oct-4-ene-1,2-dicarboxylate (3ar):**

Colorless oil (72%, 62.4 mg);  $R_f$  = 0.2 (petroleum ether/EtOAc = 1/1); <sup>1</sup>H NMR (400 MHz, CDCl<sub>3</sub>):  $\delta$  = 7.40-7.34 (m, 6H), 7.32-7.26 (m, 2H), 7.19 (d,  $J$  = 7.2 Hz, 2H), 4.29 (q,  $J$  = 7.2 Hz, 2H), 3.74-3.69 (m, 4H), 3.41 (d,  $J$  = 3.6 Hz, 2H), 3.16-3.07 (m, 3H), 1.33 (t,  $J$  = 7.2 Hz, 3H); <sup>19</sup>F NMR (376 MHz, CDCl<sub>3</sub>):  $\delta$  = -94.53 (s); <sup>13</sup>C NMR (100 MHz, CDCl<sub>3</sub>):  $\delta$  = 172.6, 168.9, 160.7 (d,  $J$  = 261.6 Hz), 142.3 (d,  $J$  = 4.8 Hz), 137.3, 128.4 (d,  $J$  = 2.9 Hz), 128.3, 127.4, 127.1, 126.1, 118.2, 111.4 (d,  $J$  = 20.4 Hz), 63.4, 52.8, 52.5, 48.1, 45.7 (d,  $J$  = 27.7 Hz), 44.9 (d,  $J$  = 4.0 Hz), 39.0 (d,  $J$  = 4.7 Hz), 34.7 (d,  $J$  = 3.0 Hz), 13.9 ppm; HRMS (ESI) calcd for C<sub>26</sub>H<sub>25</sub>FNO<sub>4</sub> [M+H]<sup>+</sup> 434.1762, found 434.1765.

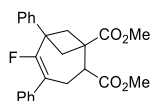

**Dimethyl 5-fluoro-4,6-diphenylbicyclo[4.1.1]oct-4-ene-1,2-dicarboxylate (4aa):**

Colorless oil (76%, 60.0 mg);  $R_f$  = 0.4 (petroleum ether/EtOAc = 5/1); <sup>1</sup>H NMR (400 MHz, CDCl<sub>3</sub>):  $\delta$  = 7.37-7.35 (m, 2H), 7.27-7.21 (m, 4H), 7.17-7.09 (m, 4H), 3.81 (t,  $J$  = 5.2 Hz, 1H), 3.64 (d,  $J$  = 3.2 Hz, 6H), 3.34 (d,  $J$  = 11.6 Hz, 1H), 3.18-3.07 (m, 3H), 2.65 (dd,  $J$  = 11.6, 4.2 Hz, 1H), 2.53 (dd,  $J$  = 11.6, 6.0 Hz, 1H); <sup>19</sup>F NMR (376 MHz, CDCl<sub>3</sub>):  $\delta$  = -97.74 (s); <sup>13</sup>C NMR (100 MHz, CDCl<sub>3</sub>):  $\delta$  = 175.1, 173.5, 159.5 (d,  $J$  = 257.3 Hz), 143.6 (d,  $J$  = 5.2 Hz), 138.9, 128.6 (d,  $J$  = 3.3 Hz), 128.1, 128.0, 126.8, 126.6, 126.2, 114.1 (d,  $J$  = 17.1 Hz), 52.4, 52.0, 47.7, 45.2 (d,  $J$  = 28.1 Hz), 45.0, 41.4, 39.2 (d,  $J$  = 2.3 Hz), 30.2 (d,  $J$  = 4.5 Hz) ppm; HRMS (ESI) calcd for C<sub>24</sub>H<sub>24</sub>FO<sub>4</sub> [M+H]<sup>+</sup> 395.1653, found 395.1657.

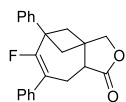

**6-Fluoro-5,7-diphenyl-4,5,8,8a-tetrahydro-1H,3H-3a,5-methanocyclohepta[c]furan-1-one (5aa):**

White solid (45%, 45.1 mg); m.p.: 180-181 °C;  $R_f$  = 0.4 (petroleum ether/EtOAc = 10/1); <sup>1</sup>H NMR (400 MHz, CDCl<sub>3</sub>):  $\delta$  = 7.41-7.28 (m, 8H), 7.25-7.21 (m, 2H), 4.25 (d,  $J$  = 9.6 Hz, 1H), 4.18 (d,  $J$  = 10.0 Hz, 1H), 3.44 (dd,  $J$  = 11.2, 6.8 Hz, 1H), 3.31-3.22 (m, 1H), 3.13-3.04 (m, 2H), 2.85 (d,  $J$  = 10.0

Hz, 1H), 2.68-2.62 (m, 1H), 2.37 (dd,  $J = 11.2, 4.8$  Hz, 1H);  $^{19}\text{F}$  NMR (376 MHz,  $\text{CDCl}_3$ ):  $\delta = -95.94$  (s);  $^{13}\text{C}$  NMR (100 MHz,  $\text{CDCl}_3$ ):  $\delta = 177.2, 159.9$  (d,  $J = 257.3$  Hz), 143.1 (d,  $J = 5.7$  Hz), 138.5, 128.3, 128.2, 128.1, 127.0, 126.8, 126.2, 113.6 (d,  $J = 17.7$  Hz), 74.9, 46.64, 46.6 (d,  $J = 28.4$  Hz), 43.9 (d,  $J = 3.6$  Hz), 42.6, 39.1 (d,  $J = 2.6$  Hz), 28.9 (d,  $J = 4.8$  Hz) ppm; HRMS (ESI) calcd for  $\text{C}_{22}\text{H}_{20}\text{FO}_2$   $[\text{M}+\text{H}]^+$  335.1442, found 335.1445.

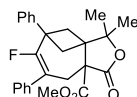

**Methyl 6-fluoro-3,3-dimethyl-1-oxo-5,7-diphenyl-5,8-dihydro-1H,3H-3a,5-methanocyclohepta[c]furan-8a(4H)-carboxylate (6ka):** Colorless oil (55%, 46.2 mg);  $R_f = 0.3$  (petroleum ether/EtOAc = 5/1);  $^1\text{H}$  NMR (400 MHz,  $\text{CDCl}_3$ ):  $\delta = 7.51$  (d,  $J = 8.0$  Hz, 2H), 7.36-7.32 (m, 4H), 7.27-7.22 (m, 2H), 7.18-7.15 (m, 2H), 3.80 (s, 3H), 3.37-3.28 (m, 3H), 3.05 (dd,  $J = 16.0, 3.6$  Hz, 1H), 2.79 (dd,  $J = 11.2, 4.8$  Hz, 1H), 2.27 (dd,  $J = 11.2, 7.2$  Hz, 1H), 1.47 (s, 3H), 1.40 (s, 3H);  $^{19}\text{F}$  NMR (376 MHz,  $\text{CDCl}_3$ ):  $\delta = -96.41$  (s);  $^{13}\text{C}$  NMR (100 MHz,  $\text{CDCl}_3$ ):  $\delta = 176.4, 172.1, 158.8$  (d,  $J = 256.2$  Hz), 142.2 (d,  $J = 5.5$  Hz), 138.7, 128.8 (d,  $J = 3.4$  Hz), 128.2, 128.0, 127.1, 126.9, 126.0, 114.2 (d,  $J = 18.8$  Hz), 85.0, 61.9, 52.2, 48.1, 46.2 (d,  $J = 28.9$  Hz), 41.6 (d,  $J = 3.8$  Hz), 39.6 (d,  $J = 1.7$  Hz), 30.9 (d,  $J = 4.4$  Hz), 26.5, 24.5 ppm; HRMS (ESI) calcd for  $\text{C}_{26}\text{H}_{26}\text{FO}_4$   $[\text{M}+\text{H}]^+$  421.1810, found 421.1817.

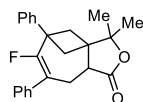

**6-Fluoro-3,3-dimethyl-5,7-diphenyl-4,5,8,8a-tetrahydro-1H,3H-3a,5-methanocyclohepta[c]furan-1-one (6ka')**: White solid (34%, 24.7 mg); m.p.: 206-207 °C;  $R_f = 0.4$  (petroleum ether/EtOAc = 5/1);  $^1\text{H}$  NMR (400 MHz,  $\text{CDCl}_3$ ):  $\delta = 7.38-7.34$  (m, 2H), 7.32-7.30 (m, 4H), 7.27-7.25 (m, 1H), 7.23-7.20 (m, 3H), 3.32-3.28 (m, 1H), 3.26-3.14 (m, 2H), 3.07-3.02 (m, 1H), 2.70 (d,  $J = 10.0$  Hz, 1H), 2.60-2.56 (m, 1H), 2.45-2.41 (m, 1H), 1.36 (s, 3H), 1.34 (s, 3H);  $^{19}\text{F}$  NMR (376 MHz,  $\text{CDCl}_3$ ):  $\delta = -96.32$  (s);  $^{13}\text{C}$  NMR (100 MHz,  $\text{CDCl}_3$ ):  $\delta = 176.2, 159.6$  (d,  $J = 257.4$  Hz), 143.6 (d,  $J = 5.7$  Hz), 138.3, 128.3 (d,  $J = 3.8$  Hz), 128.0, 127.0, 126.8, 126.3, 113.5 (d,  $J = 16.7$  Hz), 85.3, 48.3, 47.2, 44.7 (d,  $J = 28.0$  Hz), 43.3 (d,  $J = 3.6$  Hz), 34.6, 28.9 (d,  $J = 4.9$  Hz), 23.6, 23.2 ppm; HRMS (ESI) calcd for  $\text{C}_{24}\text{H}_{24}\text{FO}_2$   $[\text{M}+\text{H}]^+$  363.1755, found 363.1763.

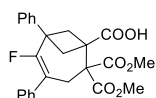

**5-Fluoro-2,2-bis(methoxycarbonyl)-4,6-diphenylbicyclo[4.1.1]oct-4-ene-1-carboxylic acid (71a):**

White solid (88%, 87.7 mg); m.p.: 166-167 °C; <sup>1</sup>H NMR (400 MHz, DMSO-d<sub>6</sub>): δ = 12.92 (s, 1H), 7.39-7.31 (m, 6H), 7.27-7.21 (m, 4H), 3.66 (s, 6H), 3.40 (d, *J* = 4.8 Hz, 2H), 3.17-3.13 (m, 2H), 3.01-2.96 (m, 2H); <sup>19</sup>F NMR (376 MHz, DMSO-d<sub>6</sub>): δ = -98.43 (s); <sup>13</sup>C NMR (100 MHz, DMSO-d<sub>6</sub>): δ = 174.7, 171.3, 160.5 (d, *J* = 257.6 Hz), 144.1 (d, *J* = 4.9 Hz), 139.1, 129.0, 128.7, 128.6, 127.5, 127.1, 126.7, 113.2 (d, *J* = 17.7 Hz), 62.8, 53.0, 48.5, 45.1 (d, *J* = 27.5 Hz), 42.0, 37.0 (d, *J* = 3.6 Hz) ppm; HRMS (ESI) calcd for C<sub>25</sub>H<sub>24</sub>FO<sub>6</sub> [M+H]<sup>+</sup> 439.1551 found 439.1542.

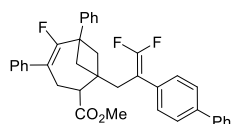

**Methyl 1-(2-([1,1'-biphenyl]-4-yl)-3,3-difluoroallyl)-5-fluoro-4,6-diphenylbicyclo[4.1.1]**

**oct-4-ene-2-carboxylate (81a):** Colorless oil (75%, 42.3 mg); *R<sub>f</sub>* = 0.3 (petroleum ether/EtOAc = 10/1); <sup>1</sup>H NMR (400 MHz, CDCl<sub>3</sub>): δ = 7.57-7.50 (m, 4H), 7.42-7.38 (m, 2H), 7.33-7.28 (m, 3H), 7.25-7.09 (m, 8H), 6.99-6.96 (m, 2H), 3.71 (s, 3H), 3.12-3.07 (m, 2H), 3.01 (dt, *J* = 16.8, 5.2 Hz, 1H), 2.84 (dt, *J* = 16.8, 4.0 Hz, 1H), 2.69-2.63 (m, 2H), 2.58-2.54 (m, 1H), 2.42 (d, *J* = 11.2 Hz, 1H), 2.08 (dd, *J* = 12.0, 4.4 Hz, 1H); <sup>19</sup>F NMR (376 MHz, CDCl<sub>3</sub>): δ = -89.23 (d, *J* = 39.1 Hz), -89.91 (d, *J* = 38.7 Hz), -99.17 (s); <sup>13</sup>C NMR (100 MHz, CDCl<sub>3</sub>): δ = 174.1, 159.4 (d, *J* = 256.7 Hz), 154.5, (t, *J* = 288.3 Hz), 144.6 (d, *J* = 5.4 Hz), 140.4, 140.3, 139.3, 132.8 (dd, *J* = 4.4, 2.3 Hz), 129.0 (t, *J* = 2.7 Hz), 128.8, 128.6 (d, *J* = 3.3 Hz), 128.0, 127.9, 127.5, 127.1, 127.0, 126.6, 126.3, 126.25, 114.5 (d, *J* = 17.1 Hz), 89.9 (dd, *J* = 21.0, 14.6 Hz), 51.6, 47.9, 45.9 (d, *J* = 27.0 Hz), 43.3 (d, *J* = 3.2 Hz), 42.1, 40.9, 39.8, 31.1 (d, *J* = 4.8 Hz) ppm; HRMS (ESI) calcd for C<sub>37</sub>H<sub>32</sub>F<sub>3</sub>O<sub>2</sub> [M+H]<sup>+</sup> 565.2349, found 565.2333.

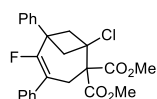

**Dimethyl 1-chloro-5-fluoro-4,6-diphenylbicyclo[4.1.1]oct-4-ene-2,2-dicarboxylate (91a):**

Colorless oil (52%, 22.3 mg); *R<sub>f</sub>* = 0.3 (petroleum ether/EtOAc = 10/1); <sup>1</sup>H NMR (400 MHz, CDCl<sub>3</sub>): δ = 7.34 (d, *J* = 8.4 Hz, 2H), 7.30-7.24 (m, 3H), 7.21-7.18 (m, 2H), 7.16-7.12 (m, 1H), 7.07 (d, *J* = 7.2 Hz, 2H), 3.78 (s, 6H), 3.53-3.51 (m, 3H), 3.49-3.46 (m, 1H), 3.20-3.16 (m, 2H); <sup>19</sup>F NMR (376 MHz, CDCl<sub>3</sub>): δ = -98.45 (s); <sup>13</sup>C NMR (100 MHz, CDCl<sub>3</sub>): δ = 169.7, 159.1 (d, *J* = 258.9 Hz), 142.7 (d, *J* = 4.7 Hz), 137.9, 128.6 (d, *J* = 3.6 Hz), 128.4, 128.1, 127.1, 127.0, 126.3, 113.1 (d, *J* = 17.6 Hz), 67.4, 63.7, 52.9, 49.9, 44.7 (d, *J* = 28.6 Hz), 36.3 (d, *J* = 4.2 Hz) ppm; HRMS (ESI) calcd for C<sub>24</sub>H<sub>22</sub>ClNaFO<sub>4</sub> [M+Na]<sup>+</sup> 451.1083, found 451.1087.

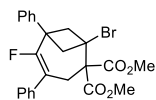

**Dimethyl 1-bromo-5-fluoro-4,6-diphenylbicyclo[4.1.1]oct-4-ene-2,2-dicarboxylate (10la):**

Colorless oil (55%, 26.1 mg);  $R_f = 0.3$  (petroleum ether/EtOAc = 10/1);  $^1\text{H NMR}$  (400 MHz,  $\text{CDCl}_3$ ):  $\delta = 7.34$  (d,  $J = 8.4$  Hz, 2H), 7.30-7.23 (m, 3H), 7.22-7.20 (m, 2H), 7.15-7.12 (m, 1H), 7.06 (d,  $J = 6.8$  Hz, 2H), 3.78 (s, 6H), 3.62-3.57 (m, 2H), 3.53 (d,  $J = 4.4$  Hz, 2H), 3.44-3.40 (m, 2H);  $^{19}\text{F NMR}$  (376 MHz,  $\text{CDCl}_3$ ):  $\delta = -98.78$  (s);  $^{13}\text{C NMR}$  (100 MHz,  $\text{CDCl}_3$ ):  $\delta = 169.8$ , 159.2 (d,  $J = 258.5$  Hz), 142.5 (d,  $J = 4.9$  Hz), 137.9, 128.6 (d,  $J = 3.6$  Hz), 128.4, 128.1, 127.1, 127.0, 126.2, 113.2 (d,  $J = 18.0$  Hz), 67.9, 54.7, 52.9, 51.1, 47.0 (d,  $J = 28.2$  Hz), 36.2 (d,  $J = 4.1$  Hz) ppm; HRMS (ESI) calcd for  $\text{C}_{24}\text{H}_{22}\text{BrNaFO}_4$   $[\text{M}+\text{Na}]^+$  495.0578, found 495.0582.

## 10 Single-crystal X-ray diffraction data for 3aa and 5aa

Preparation of the single crystals of **3aa**: 30.0 mg of pure **3aa** was dissolved in the combined solvents of MeOH and CH<sub>2</sub>Cl<sub>2</sub> (2.0 mL, v/v = 1:1) at room temperature. The bottle was sealed by a piece of plastic film with several tiny holes, thus allowing the slow solvent evaporation at 0 °C. After about two days, several small crystals were observed at the bottom of the bottle. The crystals were collected and subjected to the single crystal X-ray diffraction analysis for the determination of the structure of **3aa**.

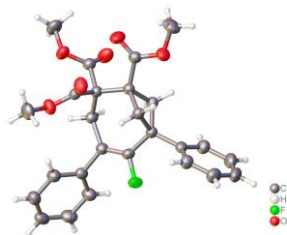

X-ray Structure of **3aa** (CCDC 2382103)  
50% probability ellipsoids

|                                    |                                                               |
|------------------------------------|---------------------------------------------------------------|
| Empirical formula                  | C <sub>26</sub> H <sub>25</sub> FO <sub>6</sub>               |
| Formula weight                     | 452.46                                                        |
| Temperature/K                      | 300.00                                                        |
| Crystal system                     | triclinic                                                     |
| Space group                        | P-1                                                           |
| a/Å                                | 7.28910(10)                                                   |
| b/Å                                | 9.7884(2)                                                     |
| c/Å                                | 15.6447(3)                                                    |
| α/°                                | 88.0640(10)                                                   |
| β/°                                | 84.5890(10)                                                   |
| γ/°                                | 80.1740(10)                                                   |
| Volume/Å <sup>3</sup>              | 1094.77(3)                                                    |
| Z                                  | 2                                                             |
| ρ <sub>calc</sub> /cm <sup>3</sup> | 1.373                                                         |
| μ/mm <sup>-1</sup>                 | 0.854                                                         |
| F(000)                             | 476.0                                                         |
| Crystal size/mm <sup>3</sup>       | 0.2 × 0.2 × 0.2                                               |
| Radiation                          | CuKα (λ = 1.54184)                                            |
| 2θ range for data collection/°     | 5.676 to 133.248                                              |
| Index ranges                       | -8 ≤ h ≤ 8, -11 ≤ k ≤ 11, -18 ≤ l ≤ 18                        |
| Reflections collected              | 19597                                                         |
| Independent reflections            | 3861 [R <sub>int</sub> = 0.0462, R <sub>sigma</sub> = 0.0430] |
| Data/restraints/parameters         | 3861/0/302                                                    |
| Goodness-of-fit on F <sup>2</sup>  | 1.030                                                         |
| Final R indexes [I ≥ 2σ (I)]       | R <sub>1</sub> = 0.0474, wR <sub>2</sub> = 0.1264             |

Final R indexes [all data]  $R_1 = 0.0491$ ,  $wR_2 = 0.1282$   
 Largest diff. peak/hole /  $e \text{ \AA}^{-3}$  0.32/-0.25

Preparation of the single crystals of **5aa**: 20.0 mg of pure **5aa** was dissolved in the combined solvents of MeOH and  $\text{CH}_2\text{Cl}_2$  (2.0 mL, v/v = 1:1) at room temperature. The bottle was sealed by a piece of plastic film with several tiny holes, thus allowing the slow solvent evaporation at 0 °C. After about two days, several small crystals were observed at the bottom of the bottle. The crystals were collected and subjected to the single crystal X-ray diffraction analysis for the determination of the structure of **5aa**.

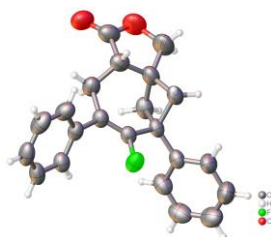

X-ray Structure of **5aa** (CCDC 2382195)  
 50% probability ellipsoids

|                                               |                                                                    |
|-----------------------------------------------|--------------------------------------------------------------------|
| Empirical formula                             | $\text{C}_{22}\text{H}_{19}\text{FO}_2$                            |
| Formula weight                                | 334.37                                                             |
| Temperature/K                                 | 301.00                                                             |
| Crystal system                                | orthorhombic                                                       |
| Space group                                   | $\text{Pna}2_1$                                                    |
| $a/\text{\AA}$                                | 11.4103(2)                                                         |
| $b/\text{\AA}$                                | 16.6264(3)                                                         |
| $c/\text{\AA}$                                | 9.23370(10)                                                        |
| $\alpha/^\circ$                               | 90                                                                 |
| $\beta/^\circ$                                | 90                                                                 |
| $\gamma/^\circ$                               | 90                                                                 |
| Volume/ $\text{\AA}^3$                        | 1751.75(5)                                                         |
| Z                                             | 4                                                                  |
| $\rho_{\text{calc}}/\text{g cm}^{-3}$         | 1.268                                                              |
| $\mu/\text{mm}^{-1}$                          | 0.707                                                              |
| F(000)                                        | 704.0                                                              |
| Crystal size/ $\text{mm}^3$                   | $0.2 \times 0.2 \times 0.2$                                        |
| Radiation                                     | $\text{CuK}\alpha$ ( $\lambda = 1.54178$ )                         |
| $2\theta$ range for data collection/ $^\circ$ | 9.4 to 136.506                                                     |
| Index ranges                                  | $-13 \leq h \leq 13$ , $-19 \leq k \leq 20$ , $-11 \leq l \leq 10$ |
| Reflections collected                         | 12016                                                              |
| Independent reflections                       | 3049 [ $R_{\text{int}} = 0.0336$ , $R_{\text{sigma}} = 0.0316$ ]   |
| Data/restraints/parameters                    | 3049/73/226                                                        |

|                                                |                                  |
|------------------------------------------------|----------------------------------|
| Goodness-of-fit on $F^2$                       | 1.027                            |
| Final R indexes [ $I \geq 2\sigma(I)$ ]        | $R_1 = 0.0355$ , $wR_2 = 0.0949$ |
| Final R indexes [all data]                     | $R_1 = 0.0376$ , $wR_2 = 0.0972$ |
| Largest diff. peak/hole / $e \text{ \AA}^{-3}$ | 0.15/-0.15                       |

## 11 References

- 1 (a) K. Livingstone, K. Siebold, S. Meyer, V. M. Heras, C. G. Daniliuc and R. Gilmour, *ACS Catal.*, 2022, **12**, 14507–14516; (b) R. Guo, Y.-C. Chang, L. Herter, C. Salome, S. E. Braley, T. C. Fessard and M. K. Brown, *J. Am. Chem. Soc.*, 2022, **144**, 7988–7994; (c) H.-M. Wang, H.-L. Shao, A. Das, S. Dutta, H. T. Chan, C. Daniliuc, K. N. Houk and F. Glorius, *Science*, 2023, **381**, 75–81; (d) K. Zhang, S. Tian, W. Li, X. Yang, X.-H. Duan, L.-N. Guo and P. Li, *Org. Lett.*, 2024, **26**, 5482–5487.
- 2 (a) M. Xu, Z. Wang, Z. Sun, Y. Ouyang, Z. Ding, T. Yu, L. Xu and P. Li, *Angew. Chem., Int. Ed.*, 2022, **61**, e20221450; (b) K. Dhake, K. J. Woelk, J. Becica, A. Un, S. E. Jenny and D. C. Leitch, *Angew. Chem., Int. Ed.*, 2022, **61**, e202204719.
- 3 G.-X. Zhang, D.-S. Li, F. Xue, A.-F. Chen and H.-P. Deng, *Adv. Synth. Catal.*, 2023, **365**, 4603–4608.
- 4 J. Tian, L. Zhou and *Chem. Sci.*, 2023, **14**, 6045–6051.
- 5 F. Chen, X. Xu, Y. He, G. Huang and S. Zhu, *Angew. Chem., Int. Ed.*, 2020, **59**, 5398–5402.
- 6 D. Wu, W. Kong, Y. Bao, D. Zhao, Y. Li and G. Yin, *Nat. Catal.*, 2023, **31**, 1030-1041.
- 7 M. Chen, Z.-J. Wu, J. Song and H.-C. Xu, *Angew. Chem., Int. Ed.*, 2022, **61**, e202115954.
- 8 C. S. Gravatt, L. Melecio-Zambrano and T. P. Yoon, *Angew. Chem., Int. Ed.*, 2021, **60**, 3989–3993.
- 9 L. Tang, Y. Xiao, F. Wu, J.-L. Zhou, T.-T. Xu and J.-J. Feng, *Angew. Chem., Int. Ed.*, 2023, **62**, e202310066.
- 10 Z. Ding, Z. Liu, Z. Wang, T. Yu, M. Xu, J. Wen, K. Yang, H. Zhang, L. Xu and P. Li, *J. Am. Chem. Soc.*, 2022, **144**, 8870–8882.
- 11 J.-H. Zhang, H.-J. Miao, J.-Y. Li, W. Li, P. Ma, X.-H. Duan and L.-N. Guo, *Chem. Commun.*, 2024, **60**, 8095–8098.
- 12 J. Qian, Y. Zhang, W. Zhao and P. Hu, *Chem. Commun.*, 2024, **60**, 2764–2767.



## 12 $^1\text{H}$ NMR, $^{19}\text{F}$ NMR and $^{13}\text{C}$ NMR Spectra of Products

$^1\text{H}$  NMR (400MHz,  $\text{CDCl}_3$ ),  $^{13}\text{C}$  NMR (100 MHz,  $\text{CDCl}_3$ ) spectra of product **1n**

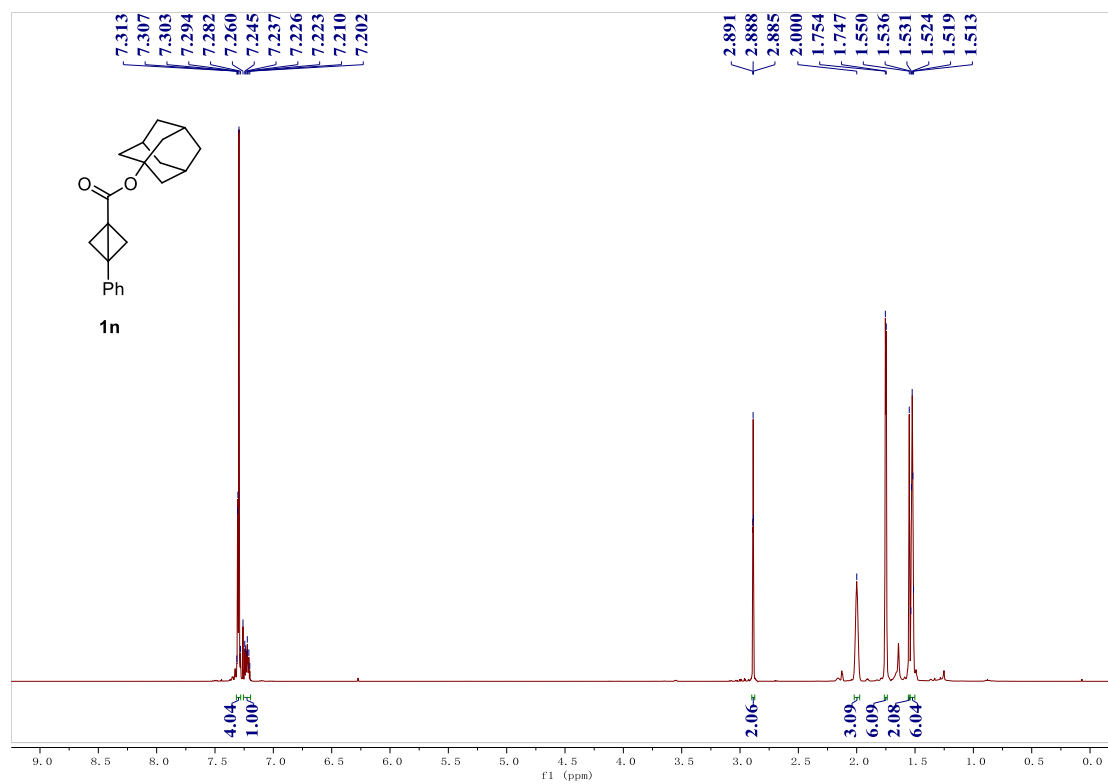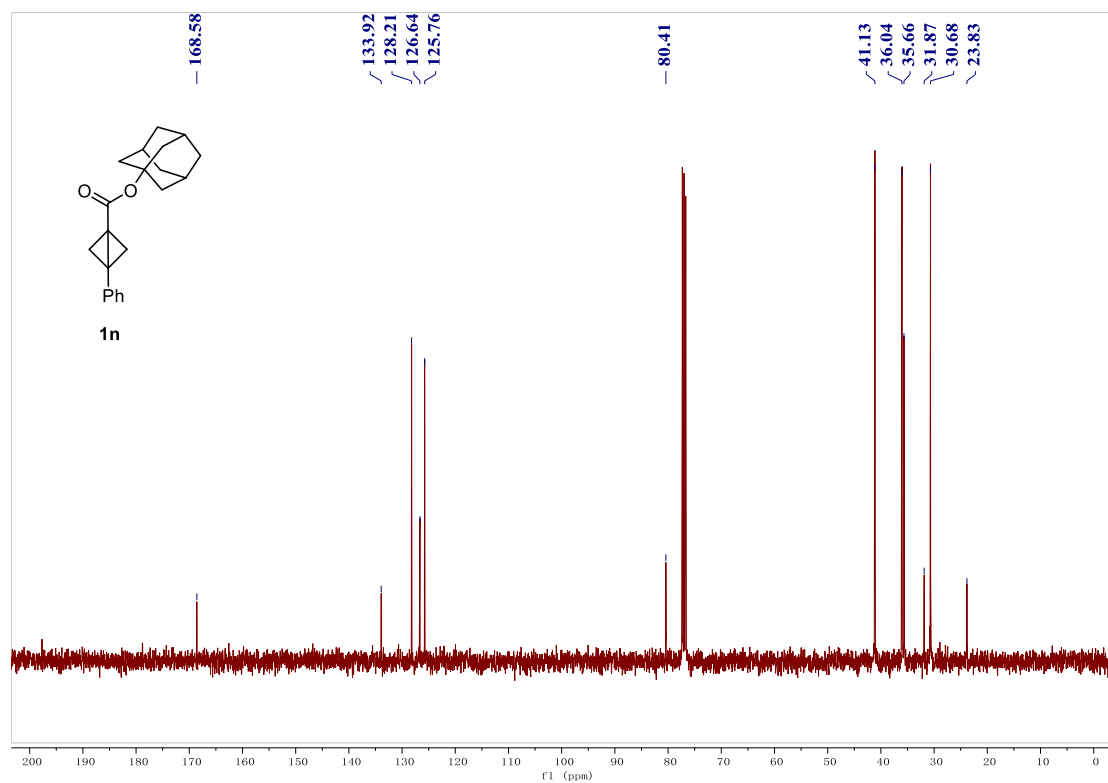

$^1\text{H}$  NMR (400MHz,  $\text{CDCl}_3$ ),  $^{13}\text{C}$  NMR (100 MHz,  $\text{CDCl}_3$ ) spectra of product **1r**

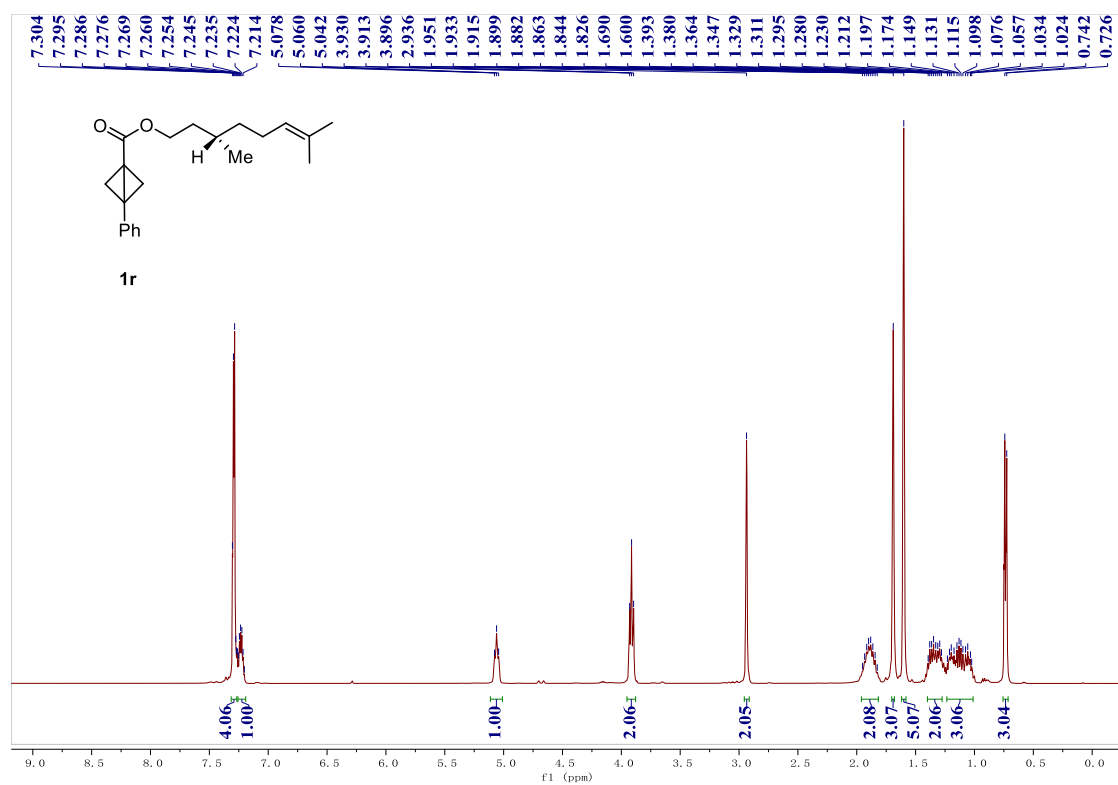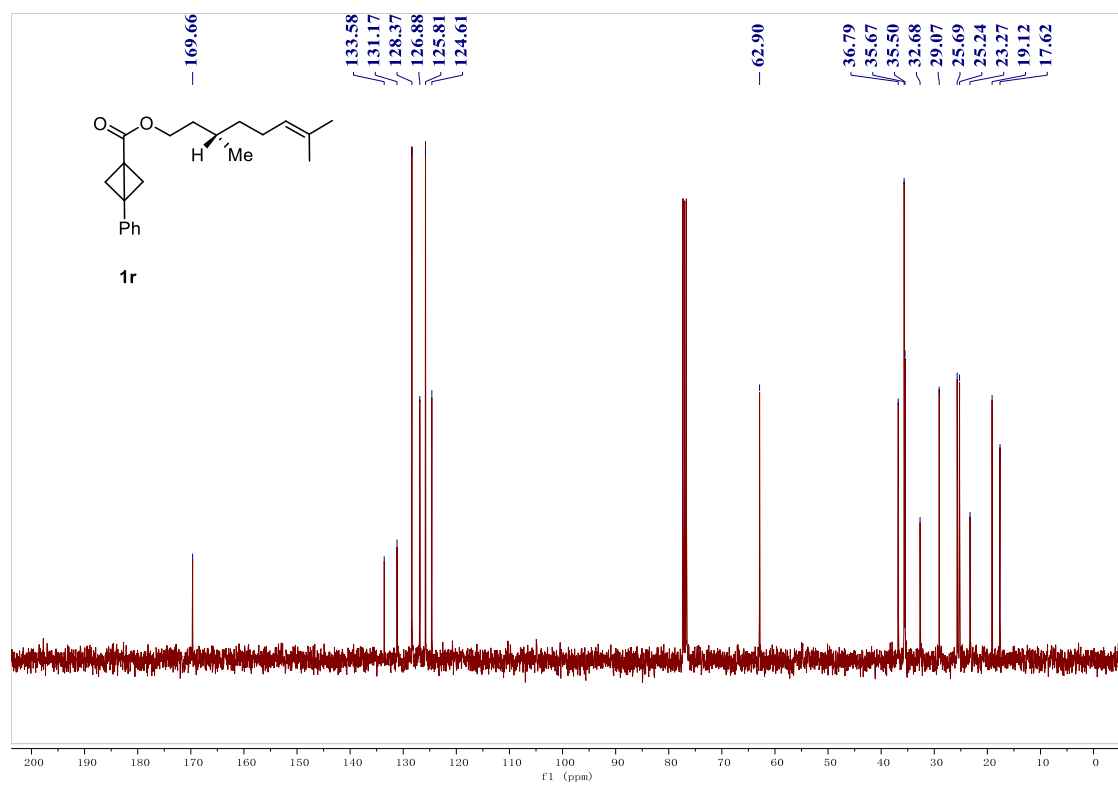

$^1\text{H}$  NMR (400MHz,  $\text{CDCl}_3$ ),  $^{19}\text{F}$  NMR (376 MHz,  $\text{CDCl}_3$ ) and  $^{13}\text{C}$  NMR (100 MHz,  $\text{CDCl}_3$ ) spectra of product **2b**

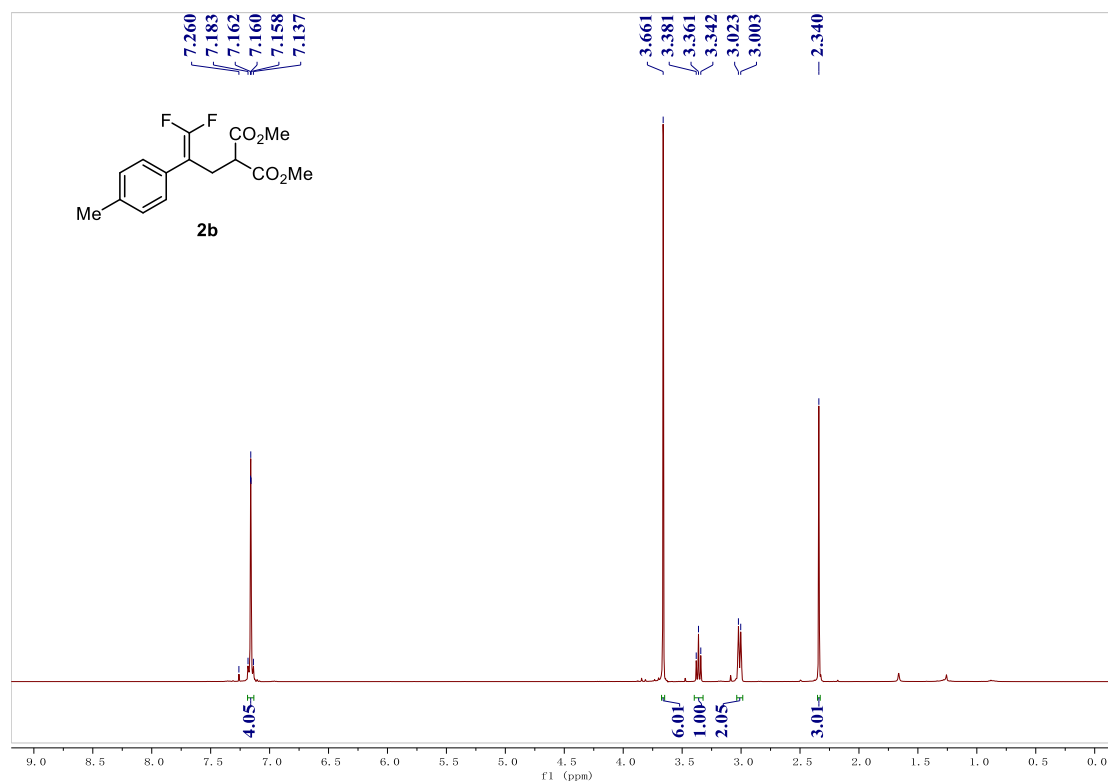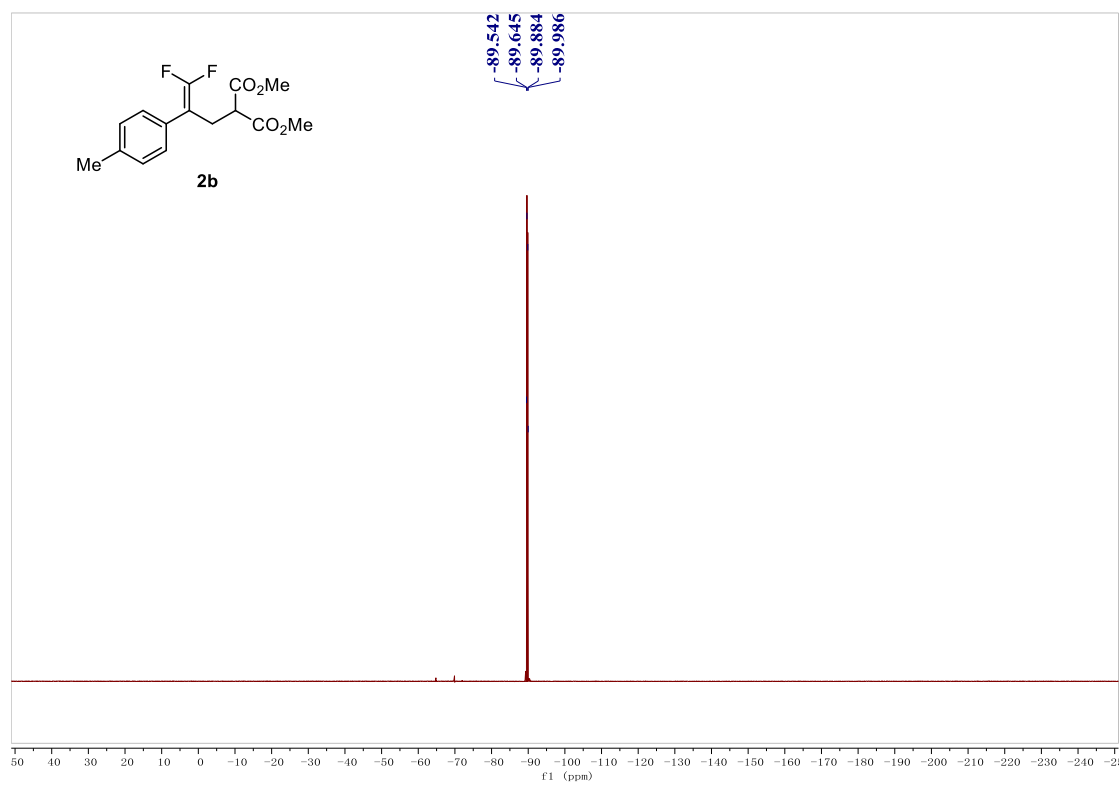

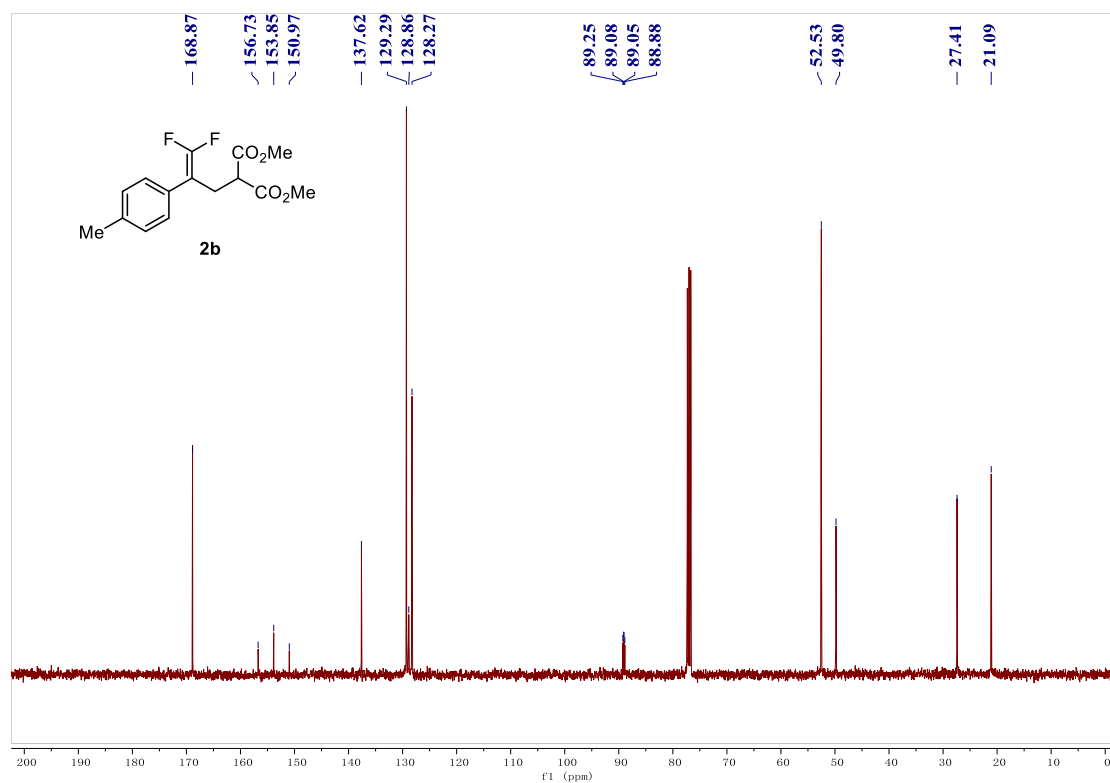

<sup>1</sup>H NMR (400MHz, CDCl<sub>3</sub>), <sup>19</sup>F NMR (376 MHz, CDCl<sub>3</sub>) and <sup>13</sup>C NMR (100 MHz, CDCl<sub>3</sub>) spectra of product **2c**

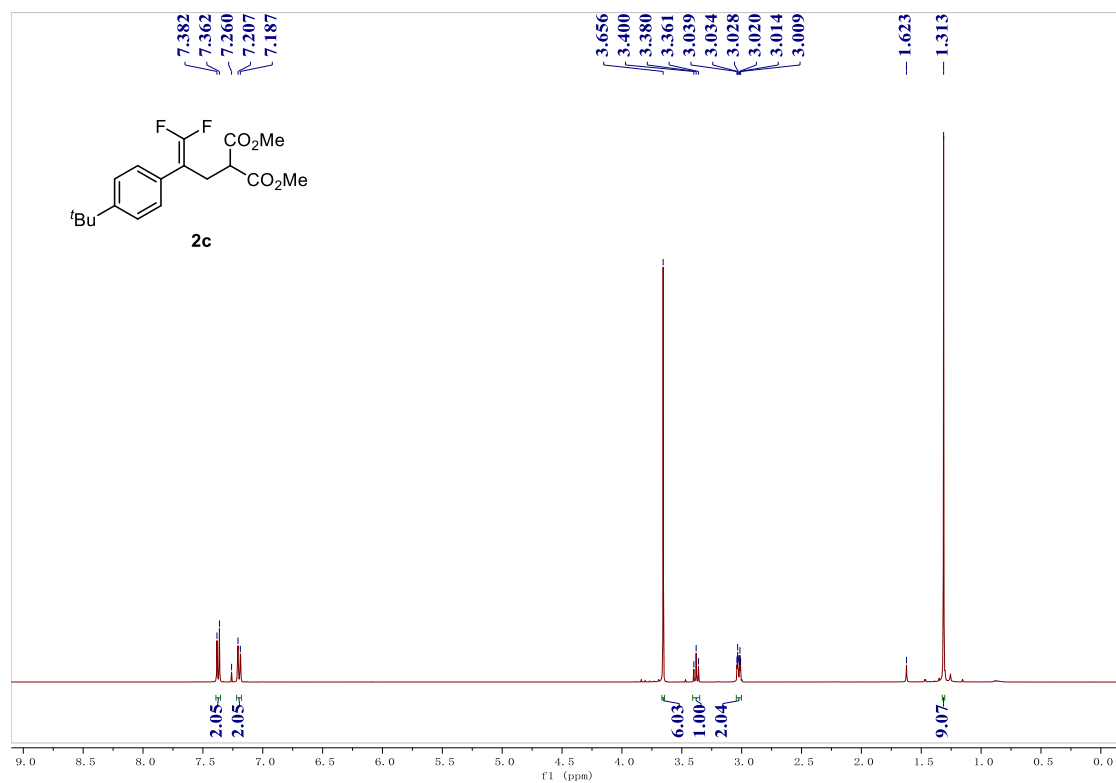

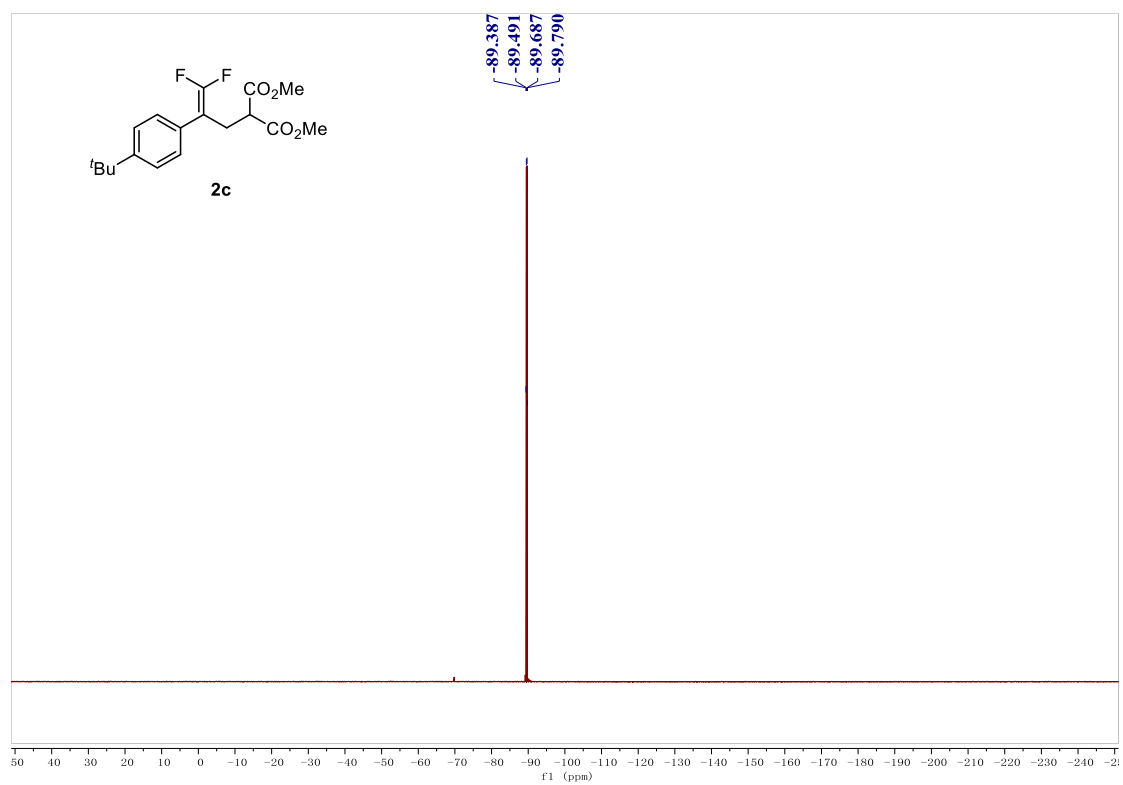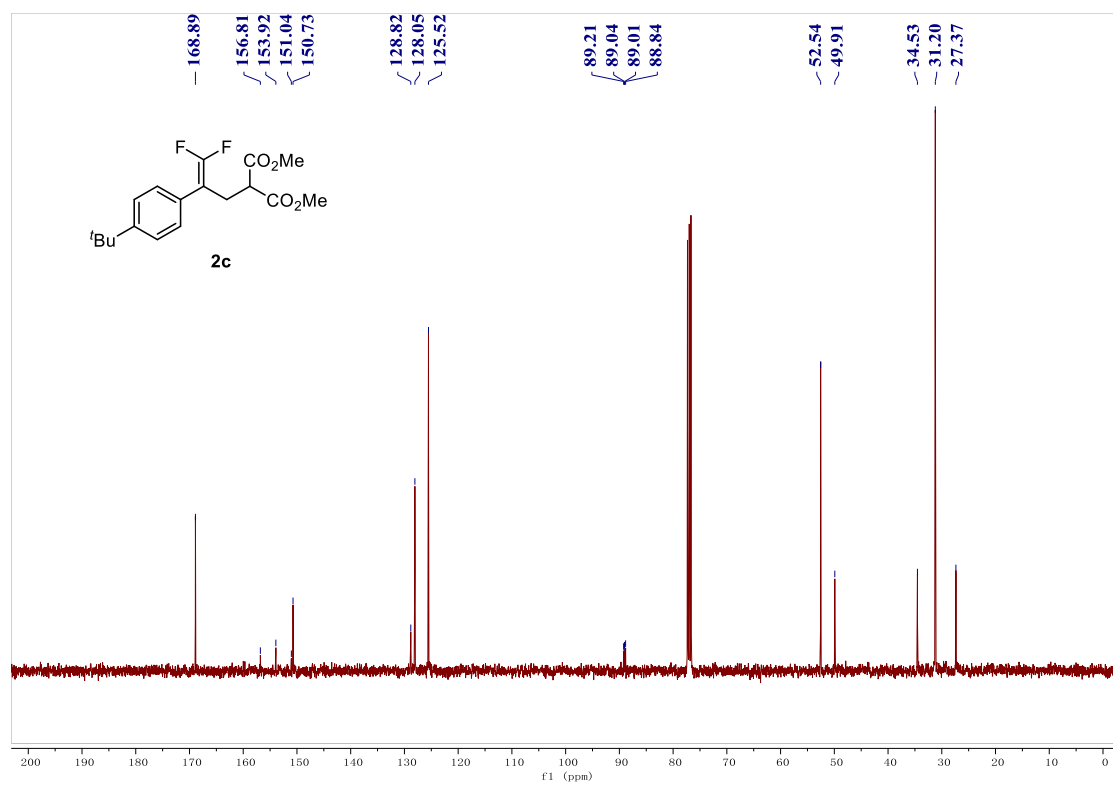

$^1\text{H}$  NMR (400MHz,  $\text{CDCl}_3$ ),  $^{19}\text{F}$  NMR (376 MHz,  $\text{CDCl}_3$ ) and  $^{13}\text{C}$  NMR (100 MHz,  $\text{CDCl}_3$ ) spectra of product **2f**

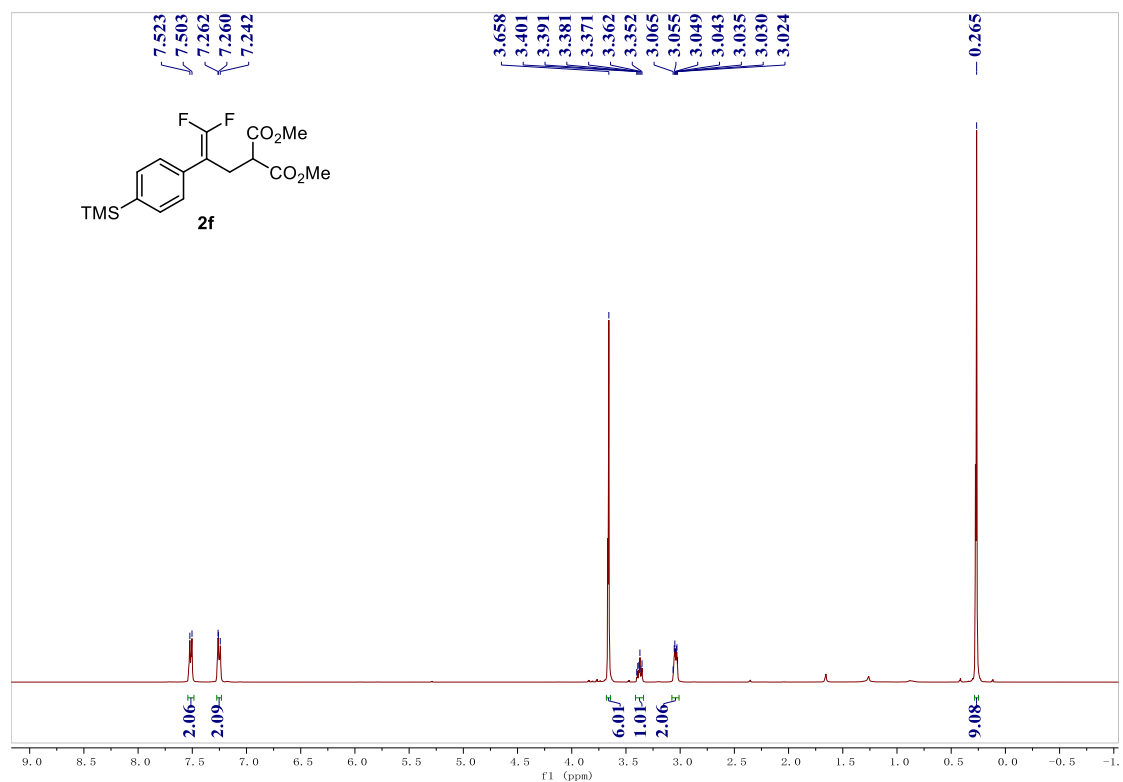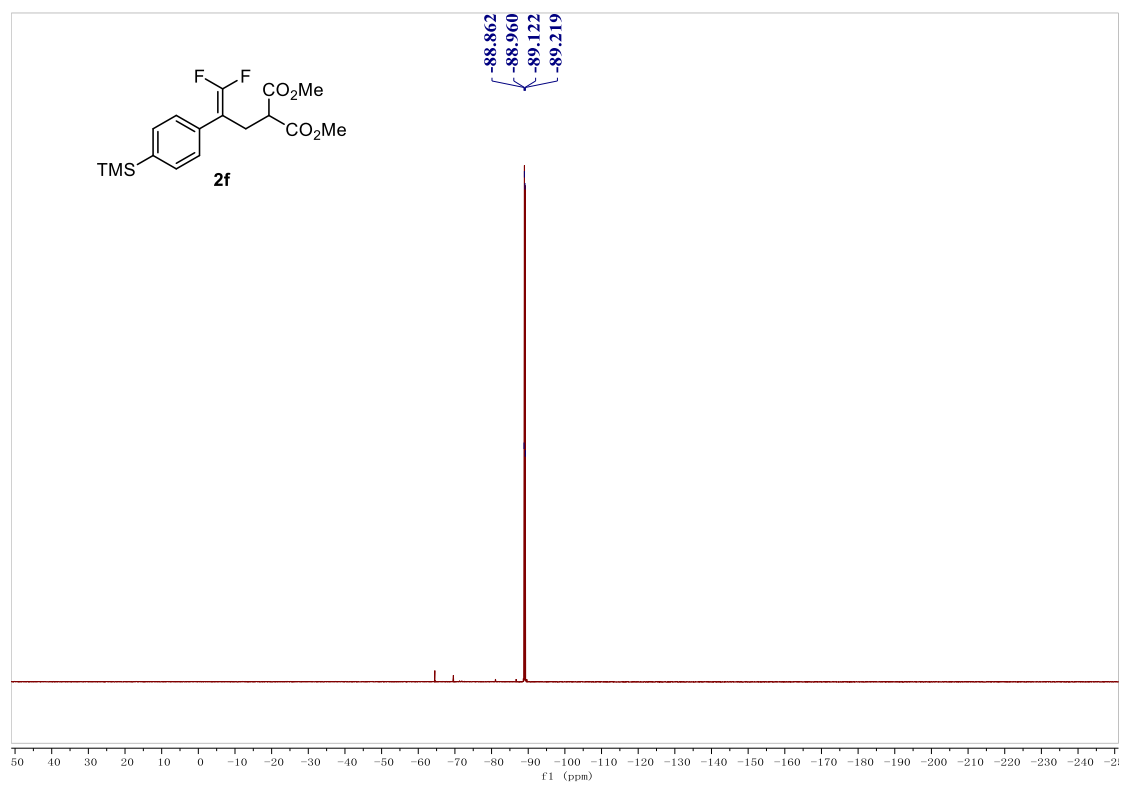

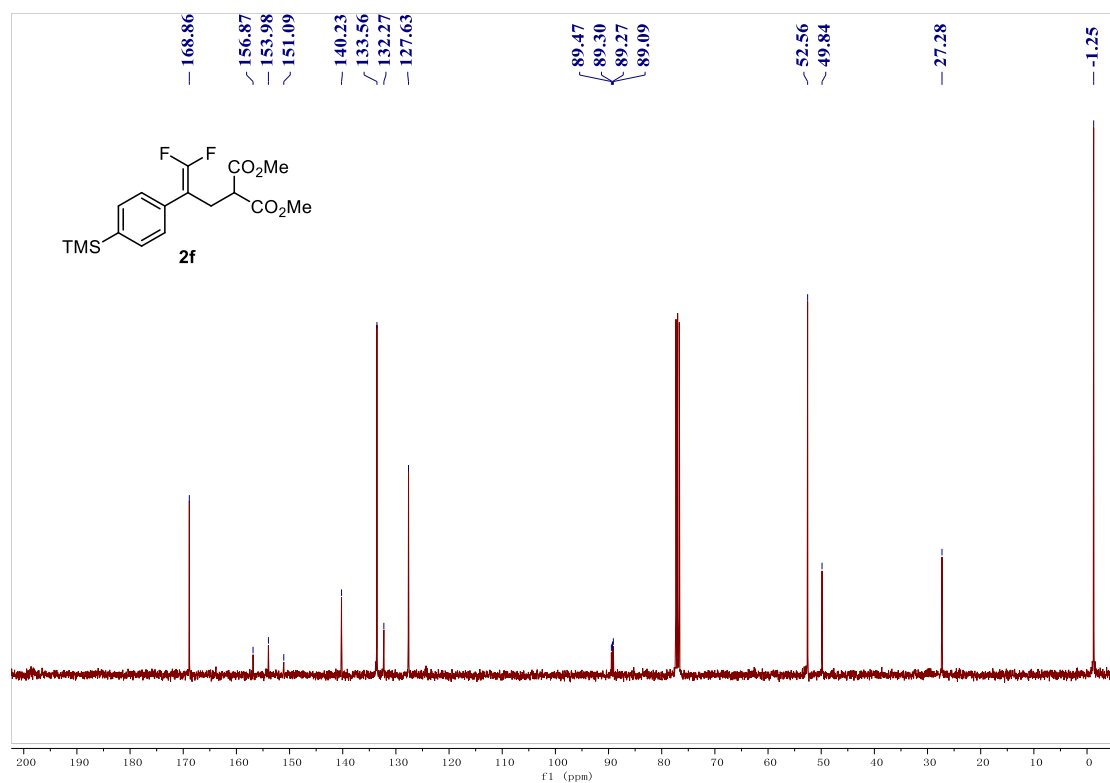

<sup>1</sup>H NMR (400MHz, CDCl<sub>3</sub>), <sup>19</sup>F NMR (376 MHz, CDCl<sub>3</sub>) and <sup>13</sup>C NMR (100 MHz, CDCl<sub>3</sub>) spectra of product **2g**

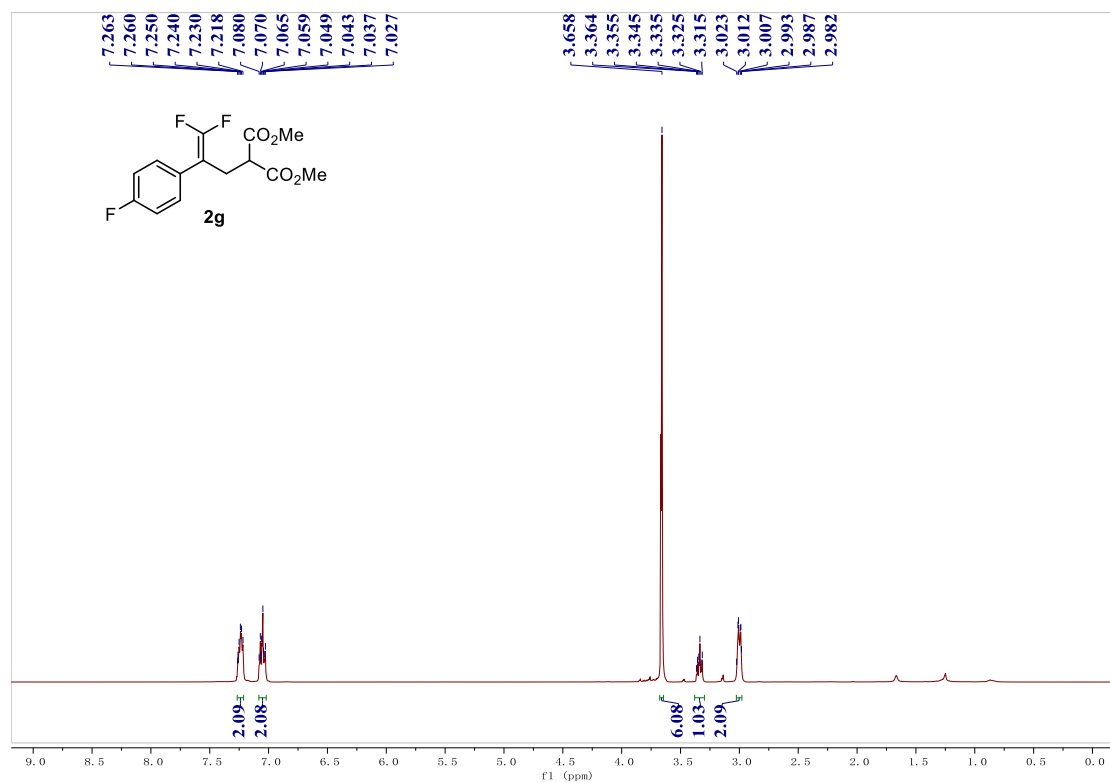

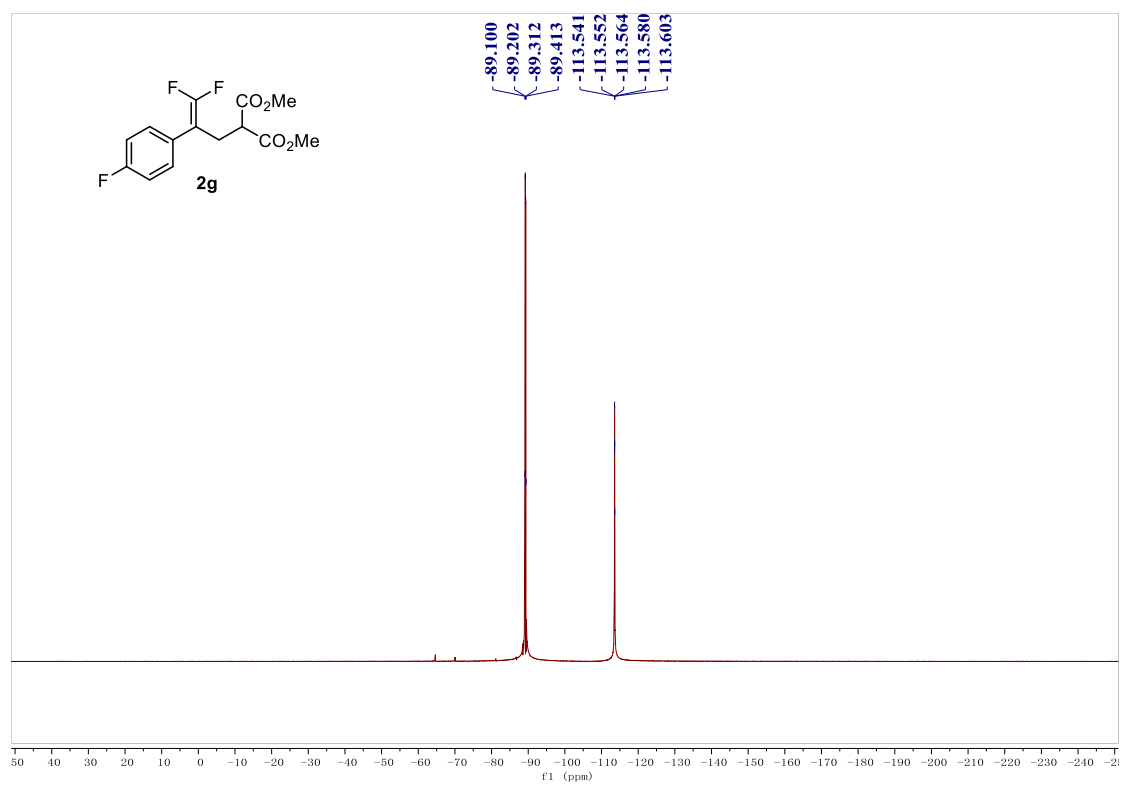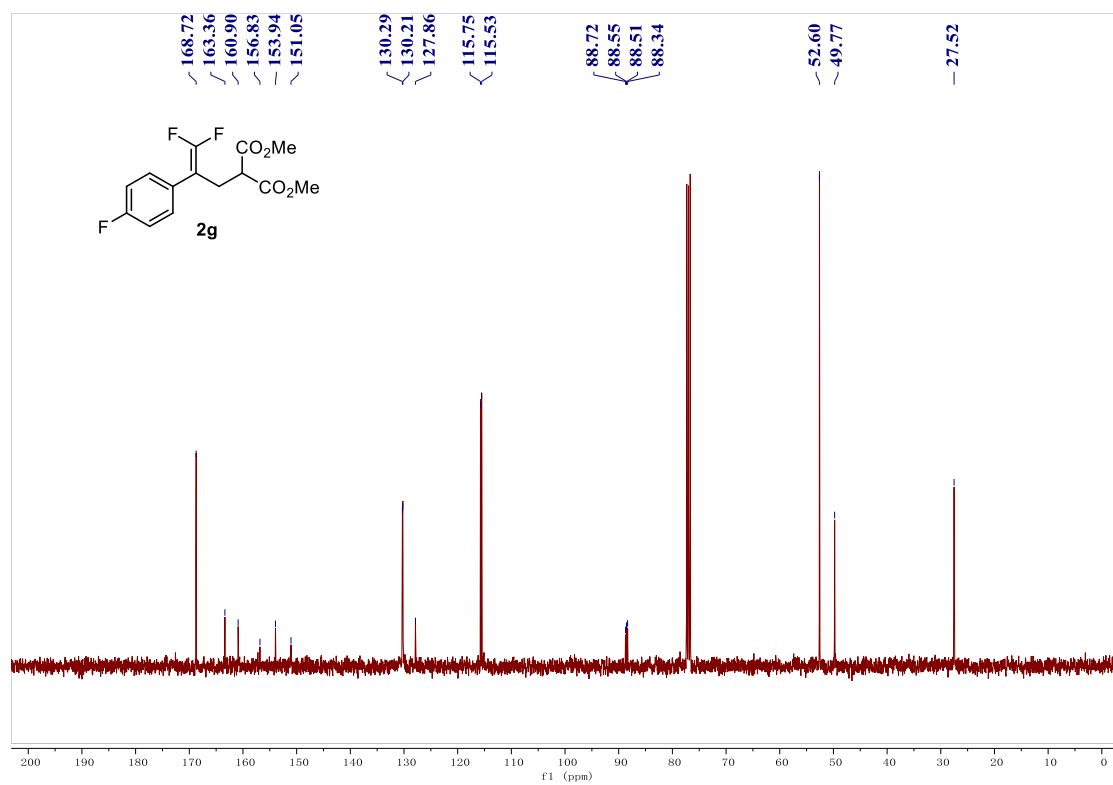



$^1\text{H}$  NMR (400MHz,  $\text{CDCl}_3$ ),  $^{19}\text{F}$  NMR (376 MHz,  $\text{CDCl}_3$ ) and  $^{13}\text{C}$  NMR (100 MHz,  $\text{CDCl}_3$ ) spectra of product **2k**

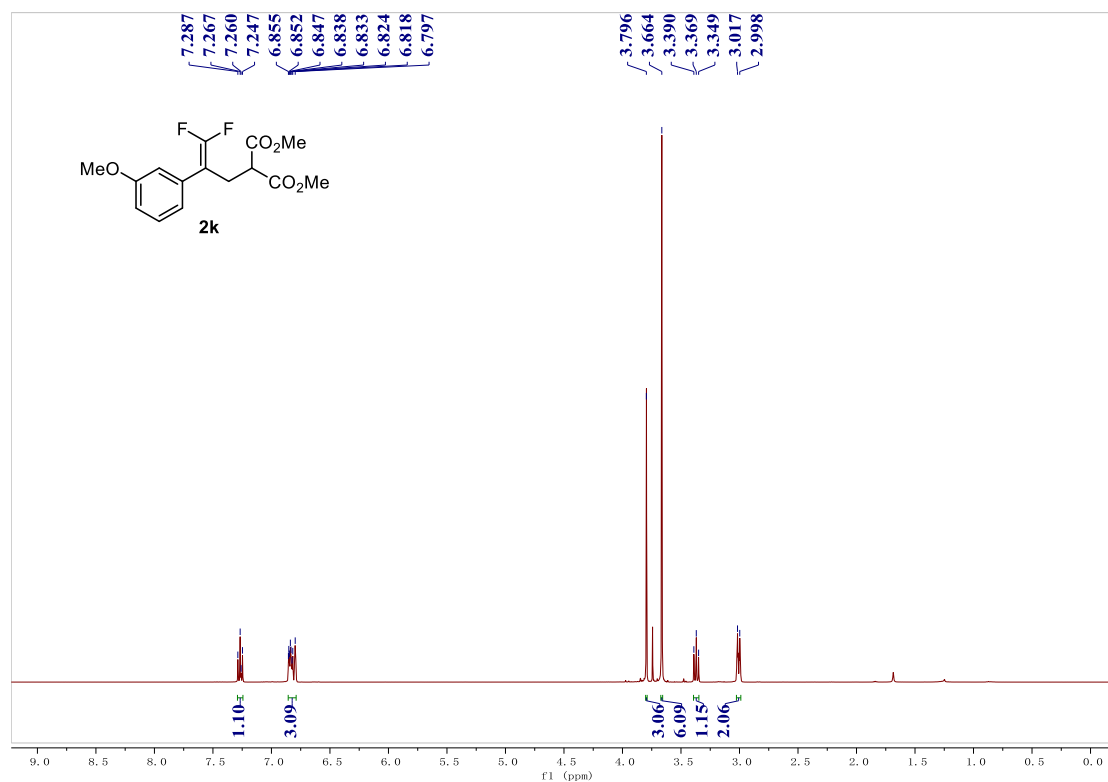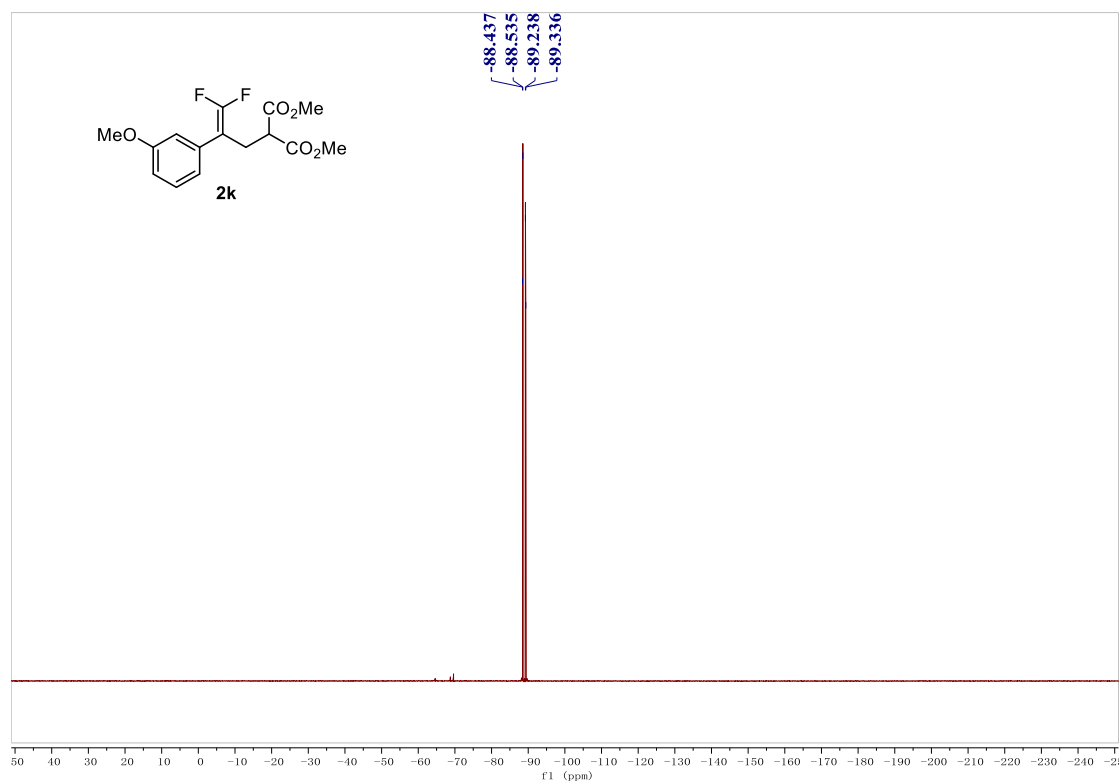

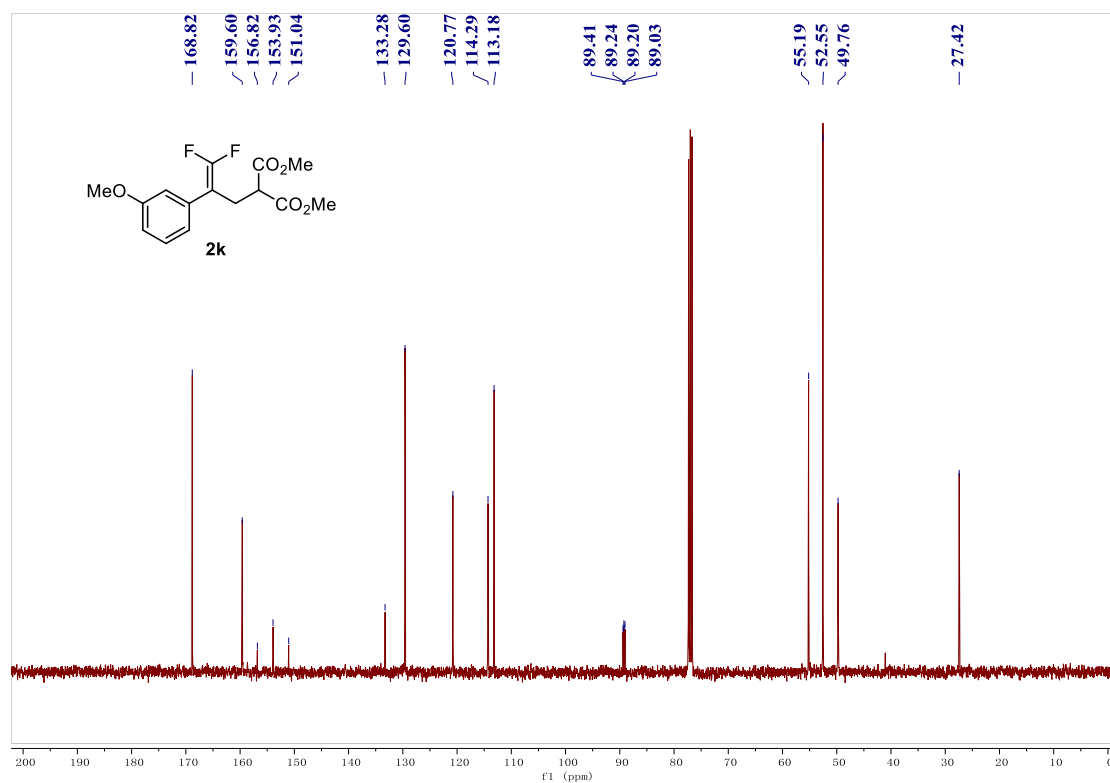

<sup>1</sup>H NMR (400MHz, CDCl<sub>3</sub>), <sup>19</sup>F NMR (376 MHz, CDCl<sub>3</sub>) and <sup>13</sup>C NMR (100 MHz, CDCl<sub>3</sub>) spectra of product **2l**

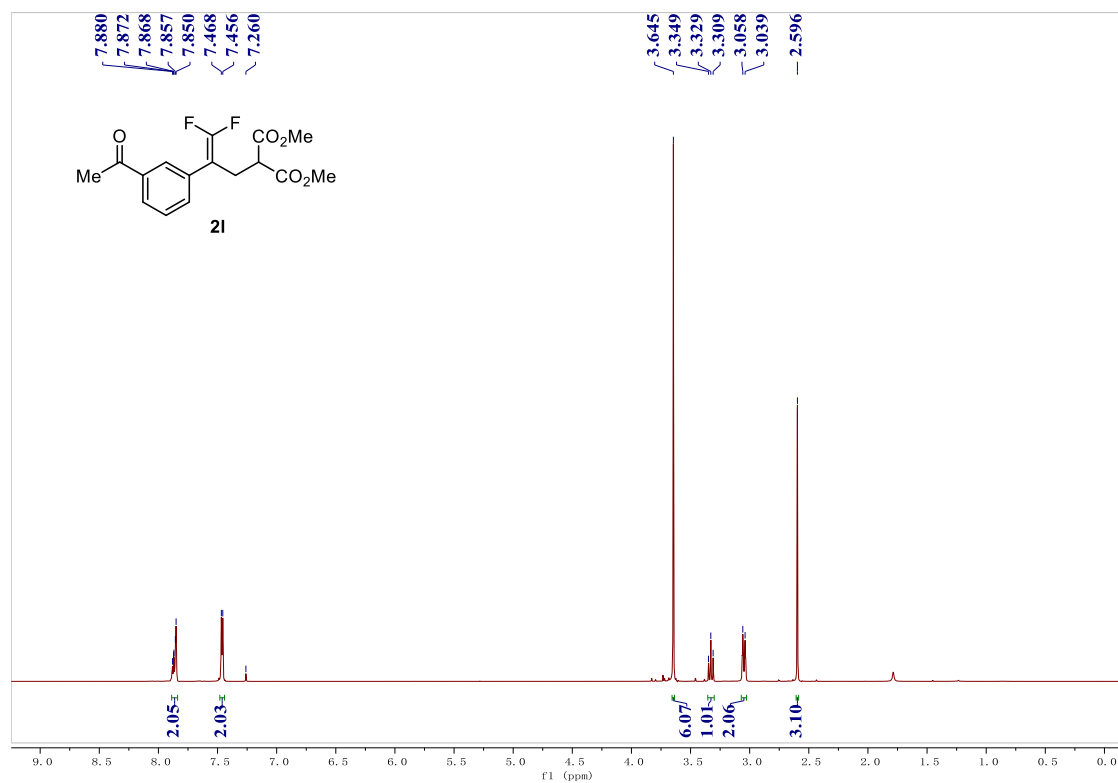

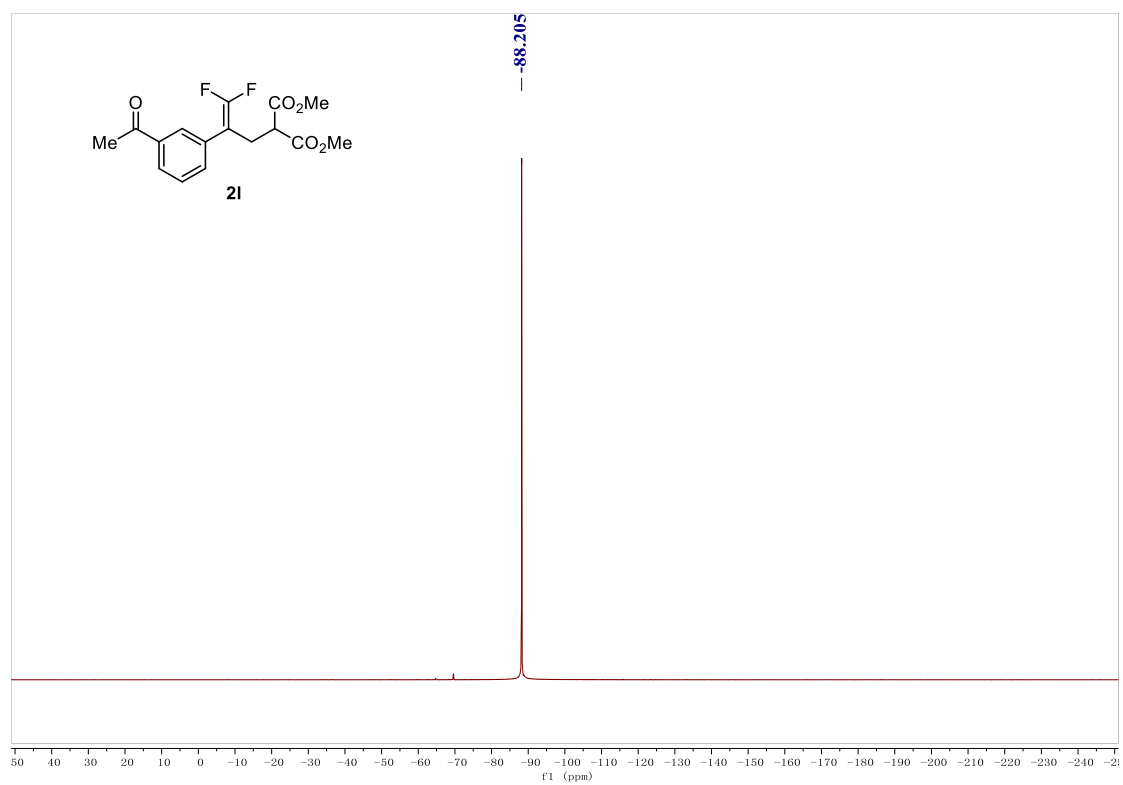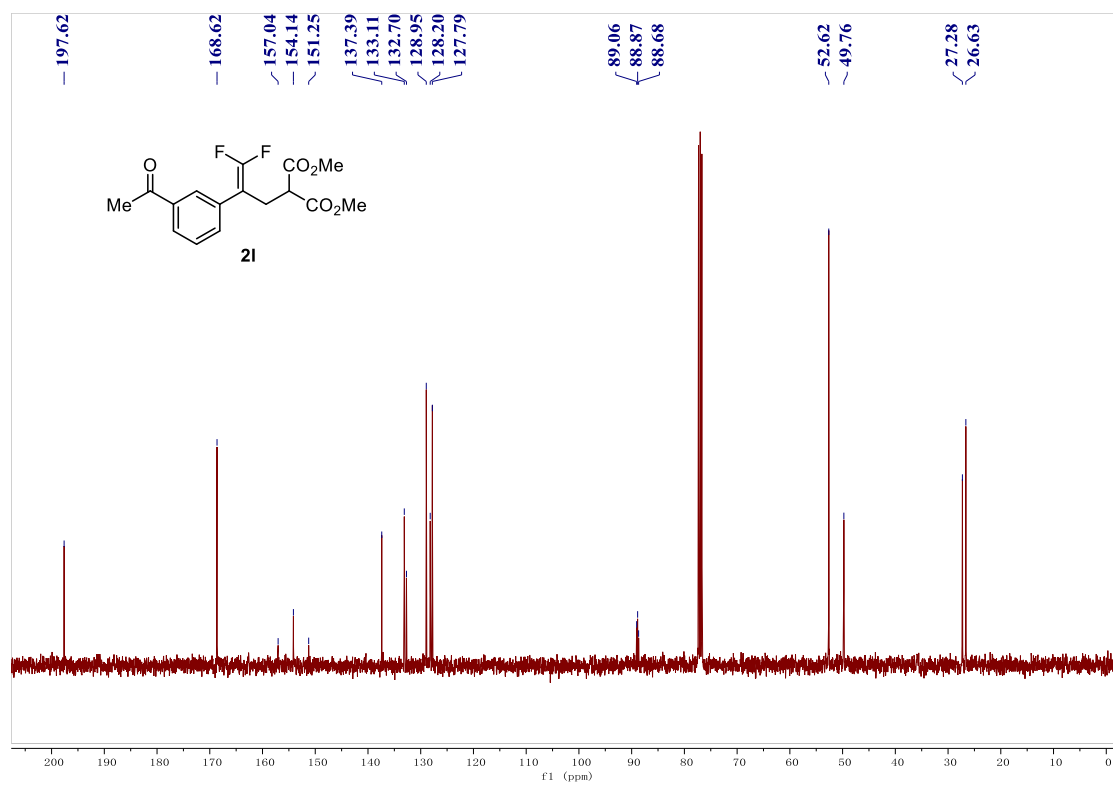

$^1\text{H}$  NMR (400MHz,  $\text{CDCl}_3$ ),  $^{19}\text{F}$  NMR (376 MHz,  $\text{CDCl}_3$ ) and  $^{13}\text{C}$  NMR (100 MHz,  $\text{CDCl}_3$ ) spectra of product **2m**

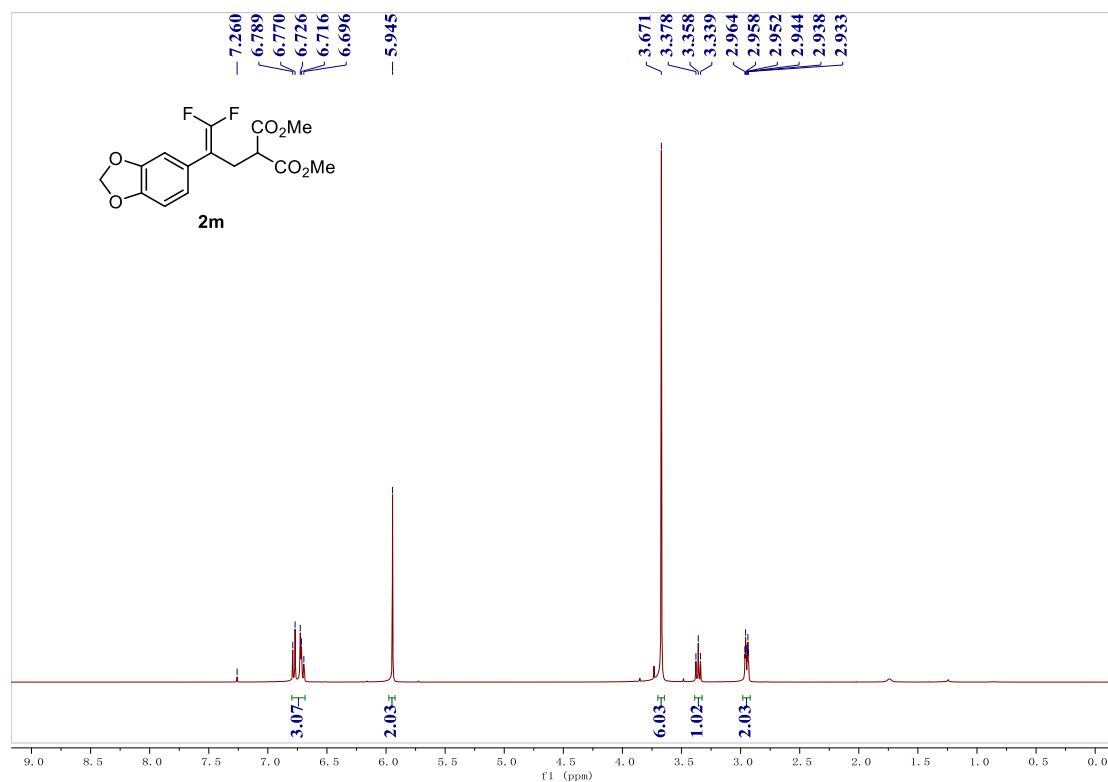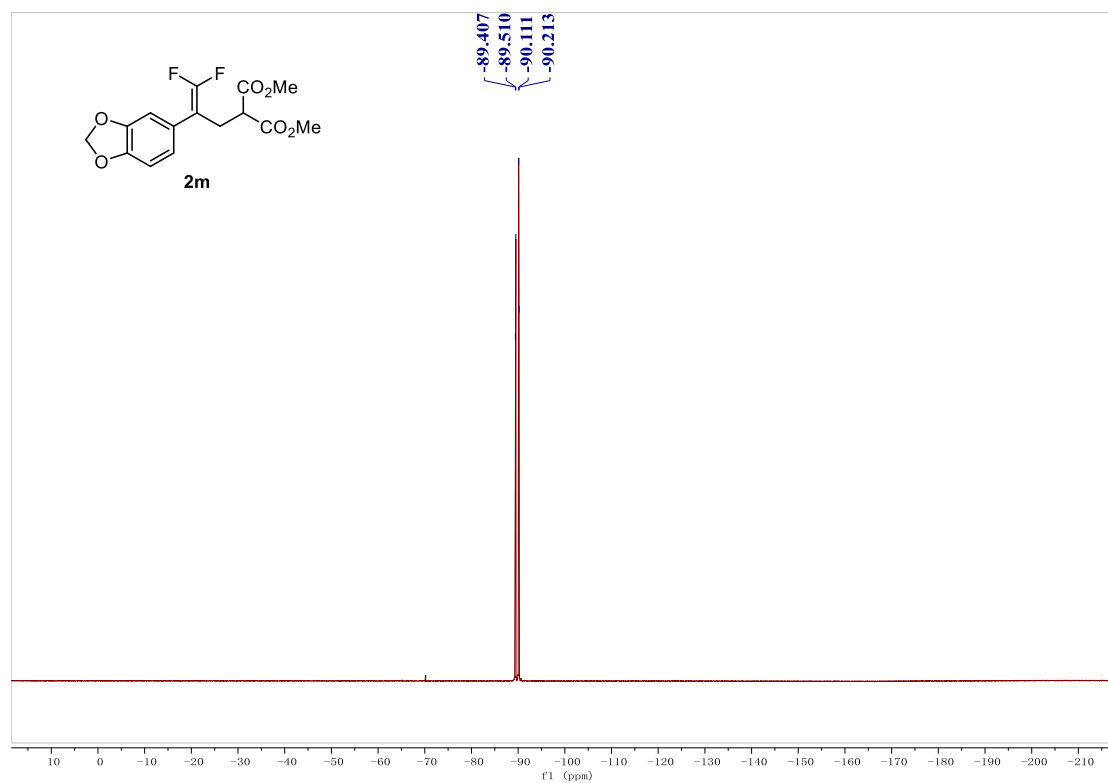

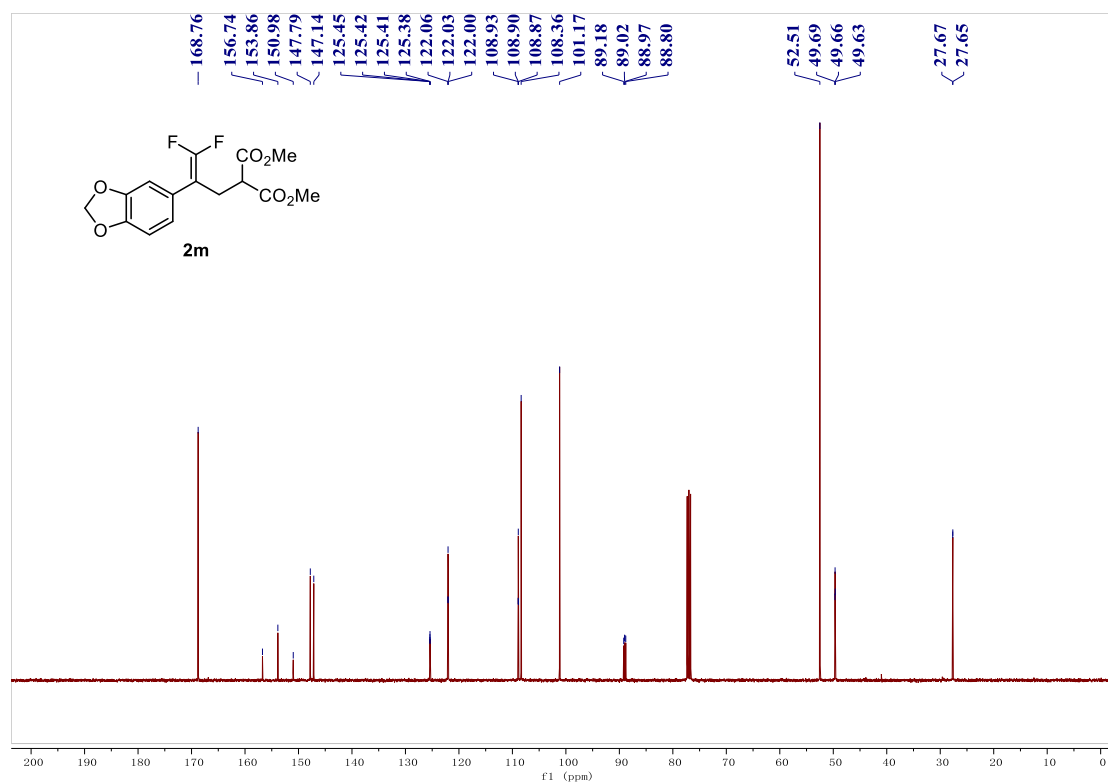

<sup>1</sup>H NMR (400MHz, CDCl<sub>3</sub>), <sup>19</sup>F NMR (376 MHz, CDCl<sub>3</sub>) and <sup>13</sup>C NMR (100 MHz, CDCl<sub>3</sub>) spectra of product **2o**

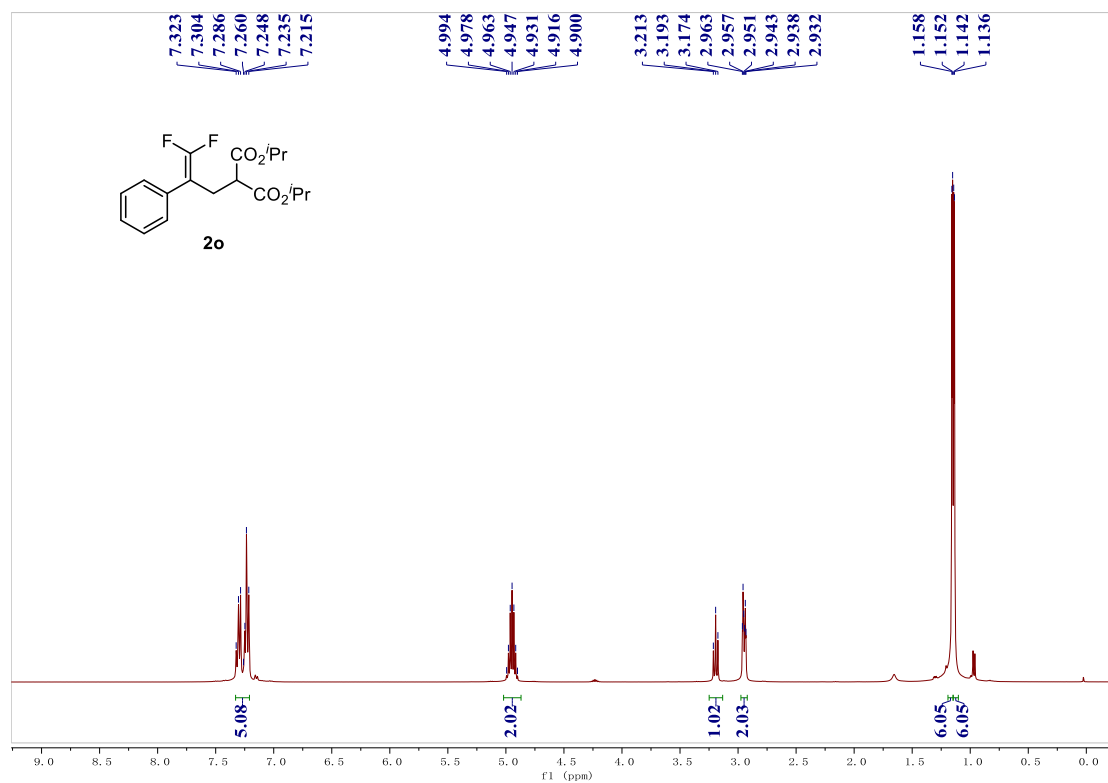

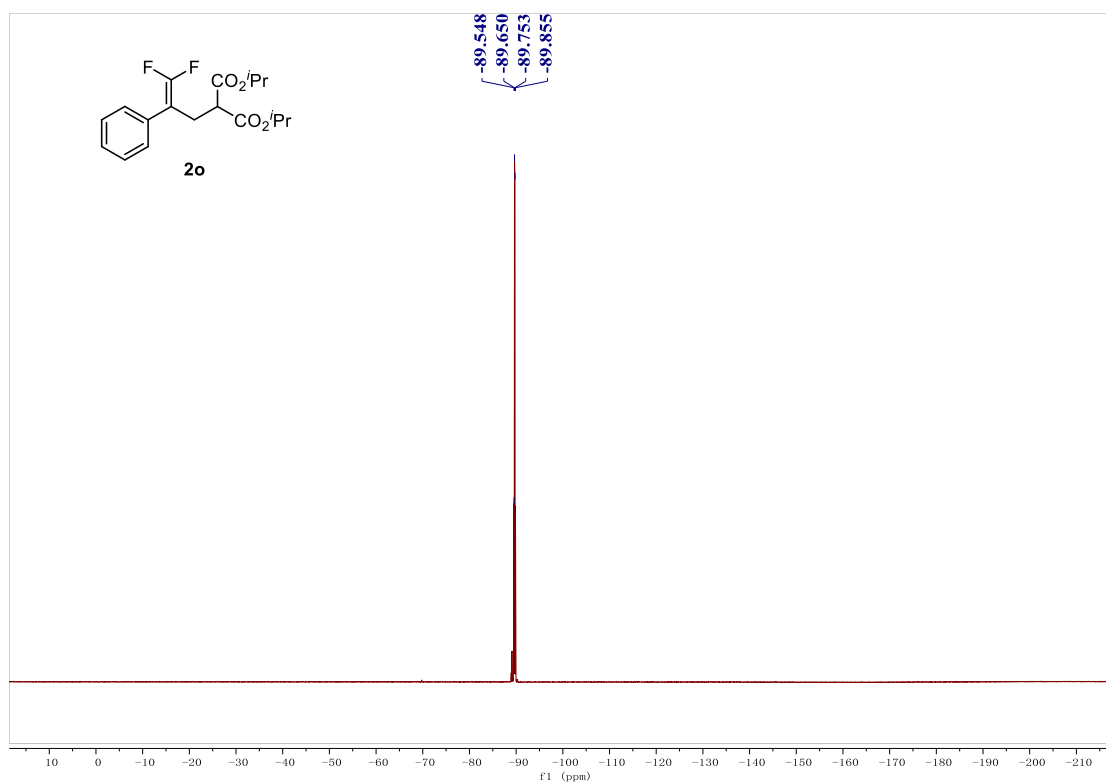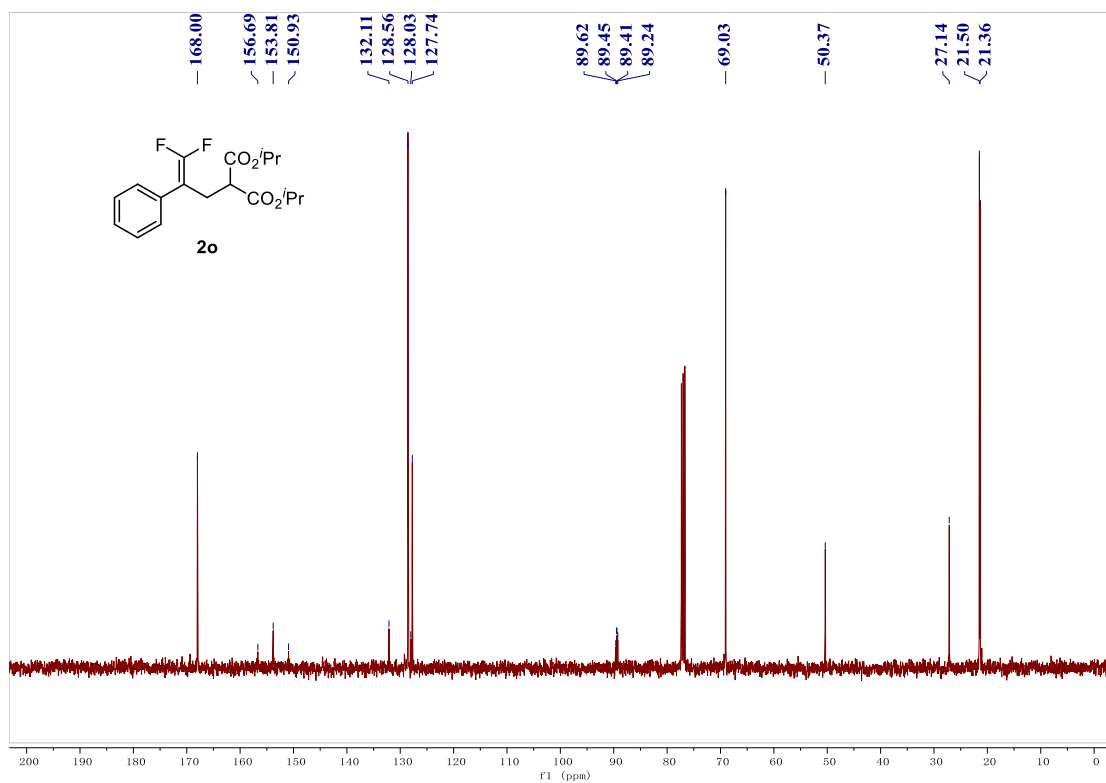

$^1\text{H}$  NMR (400MHz,  $\text{CDCl}_3$ ),  $^{19}\text{F}$  NMR (376 MHz,  $\text{CDCl}_3$ ) and  $^{13}\text{C}$  NMR (100 MHz,  $\text{CDCl}_3$ ) spectra of product **3aa**

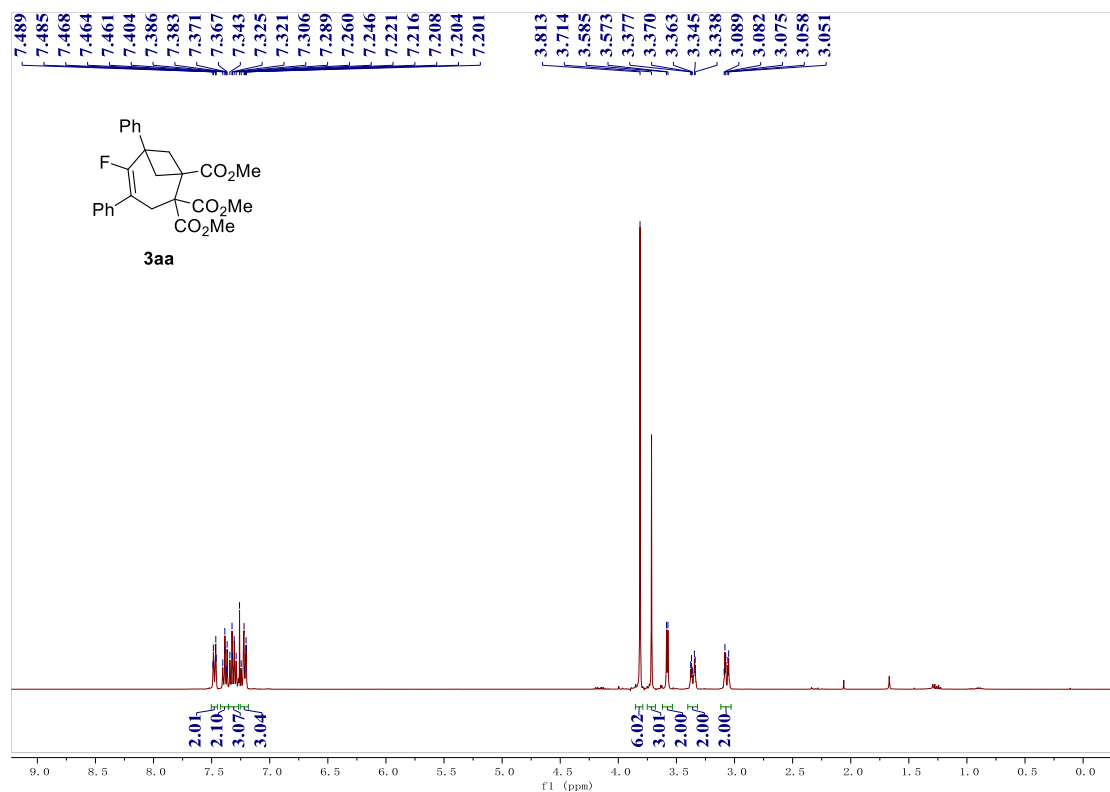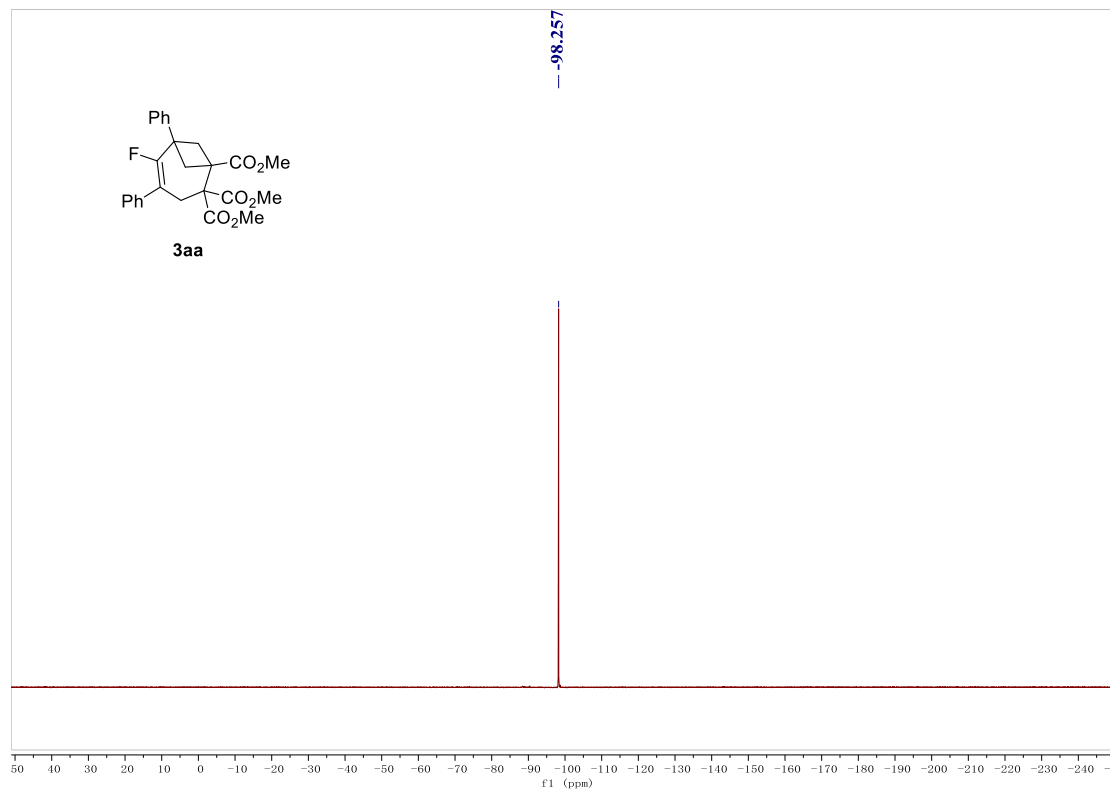

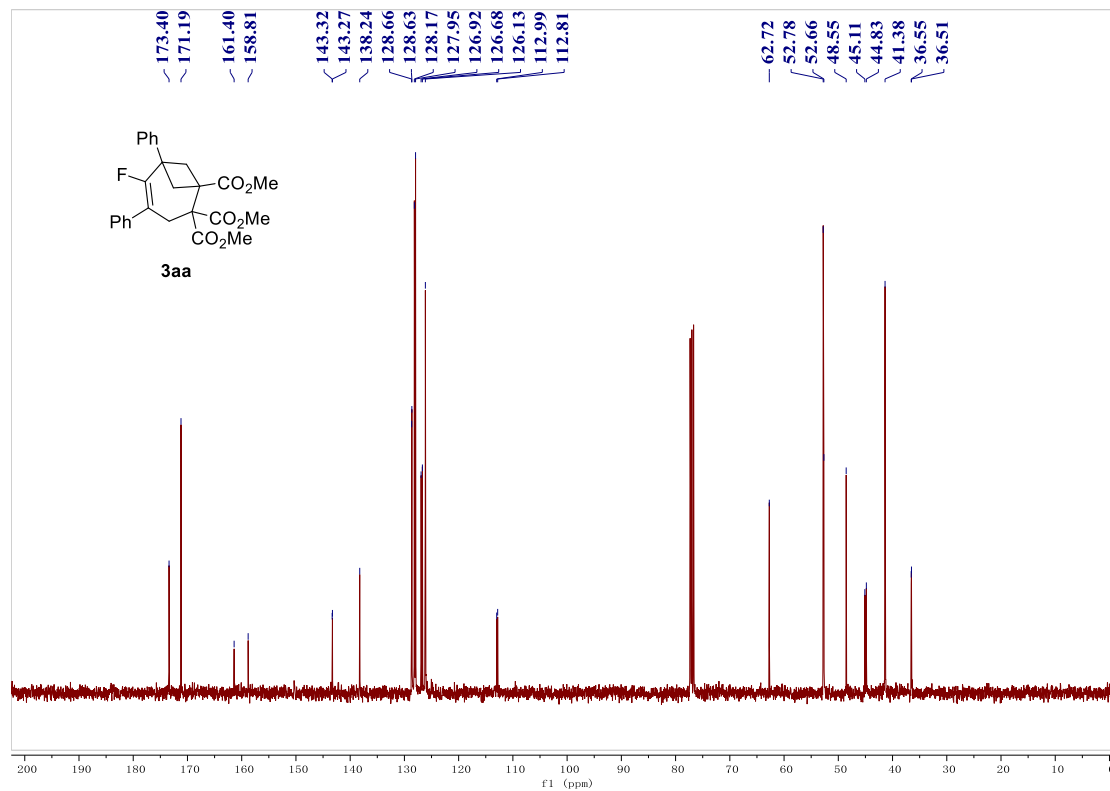

<sup>1</sup>H NMR (400MHz, CDCl<sub>3</sub>), <sup>19</sup>F NMR (376 MHz, CDCl<sub>3</sub>) and <sup>13</sup>C NMR (100 MHz, CDCl<sub>3</sub>) spectra of product **3ba**

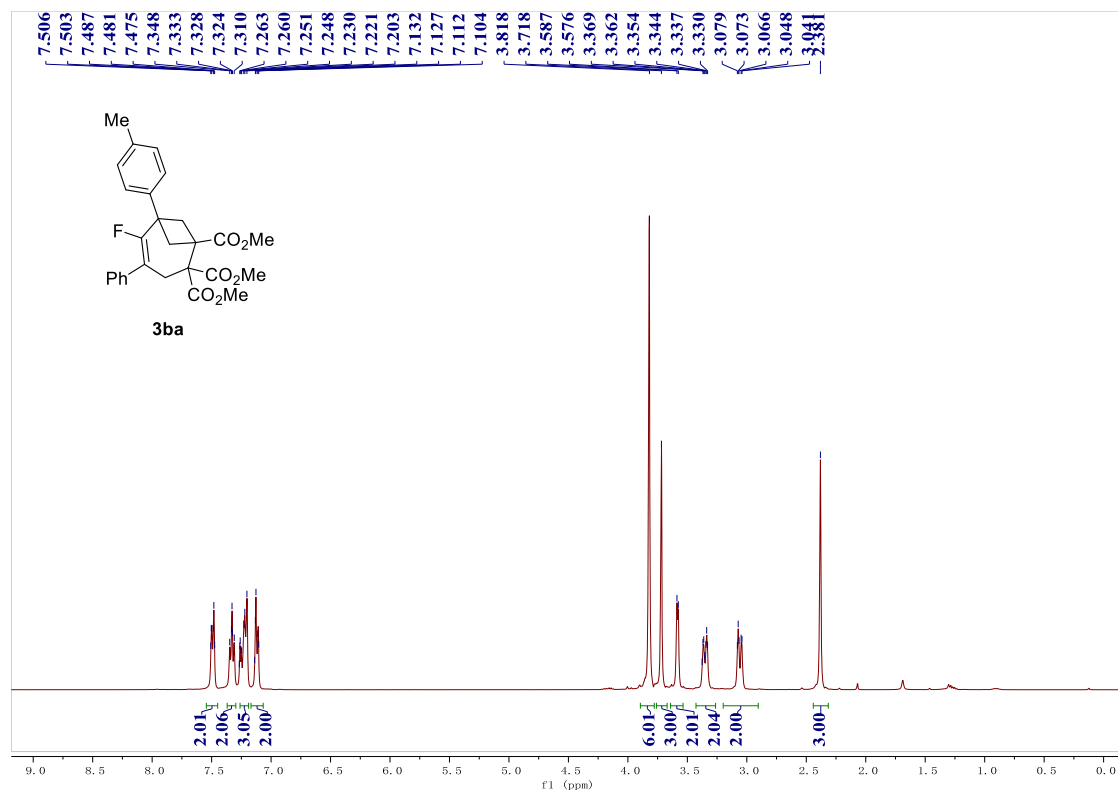



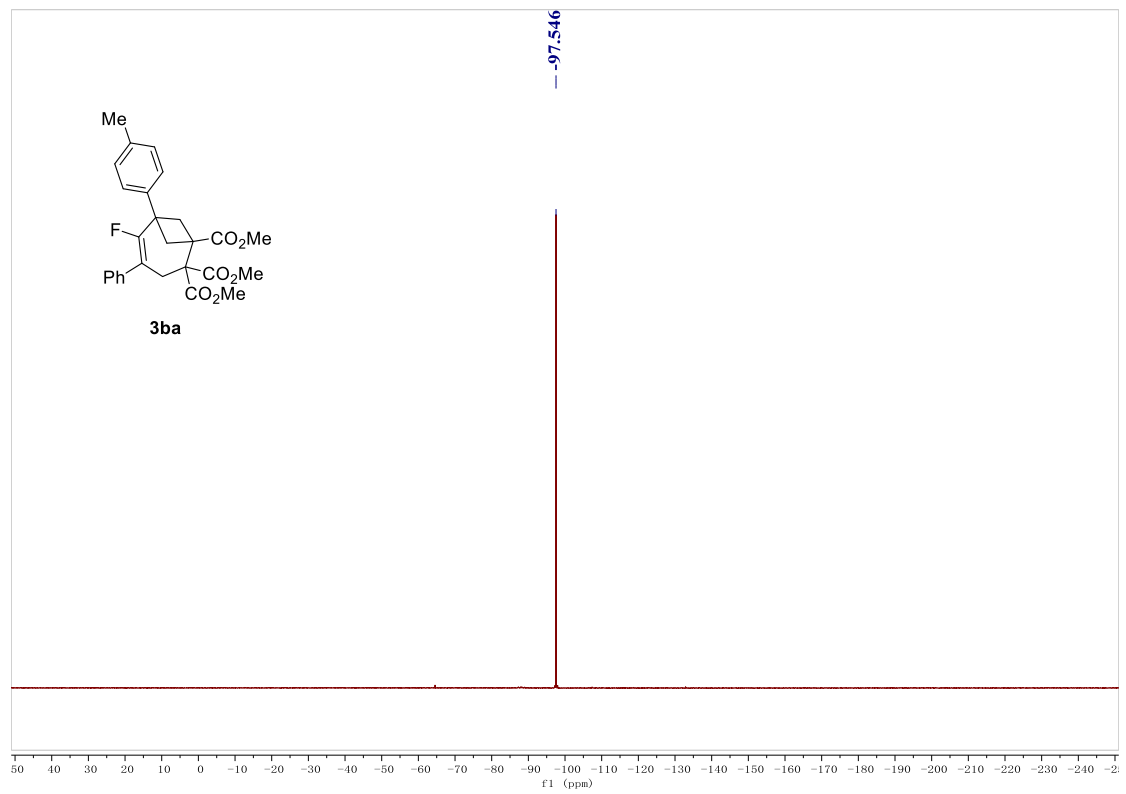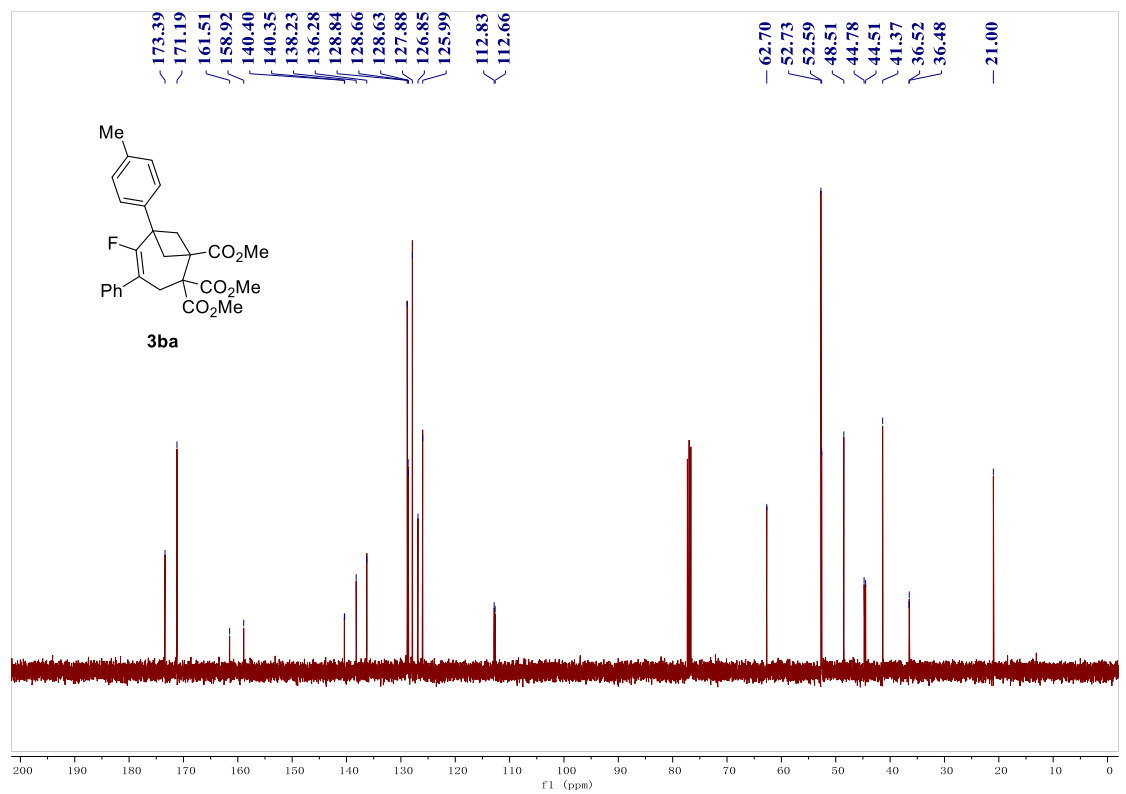

$^1\text{H}$  NMR (400MHz,  $\text{CDCl}_3$ ),  $^{19}\text{F}$  NMR (376 MHz,  $\text{CDCl}_3$ ) and  $^{13}\text{C}$  NMR (100 MHz,  $\text{CDCl}_3$ ) spectra of product **3ca**

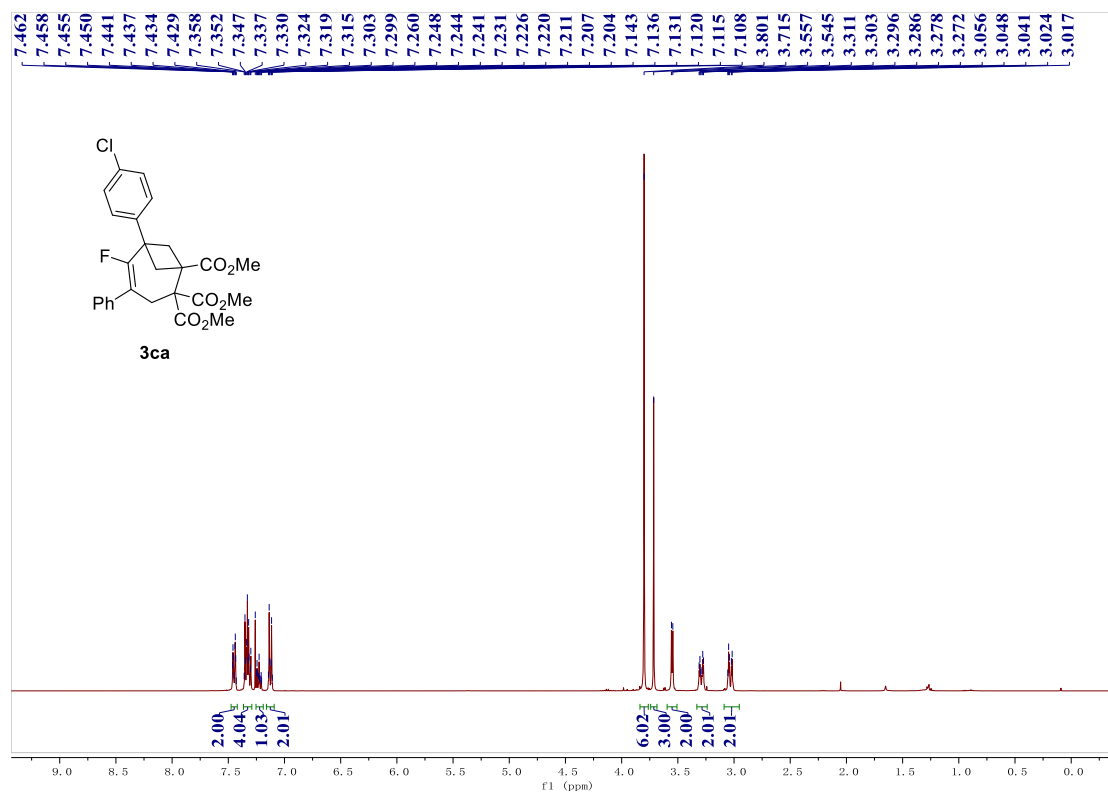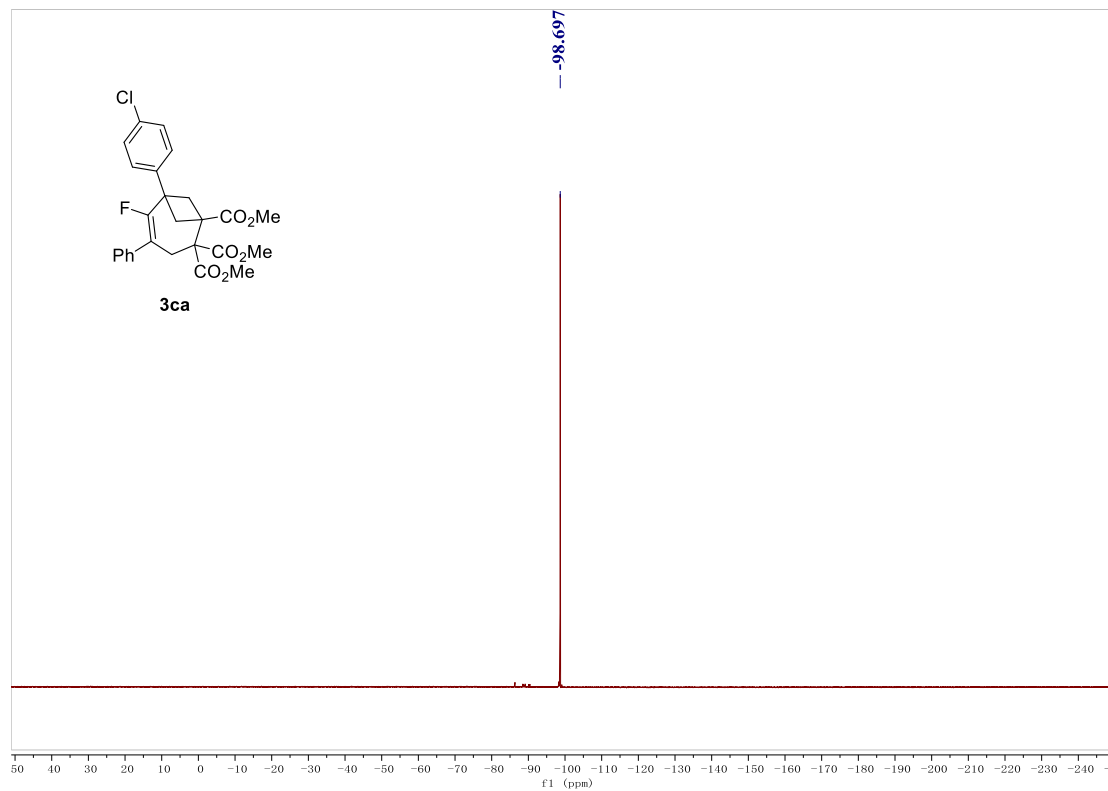

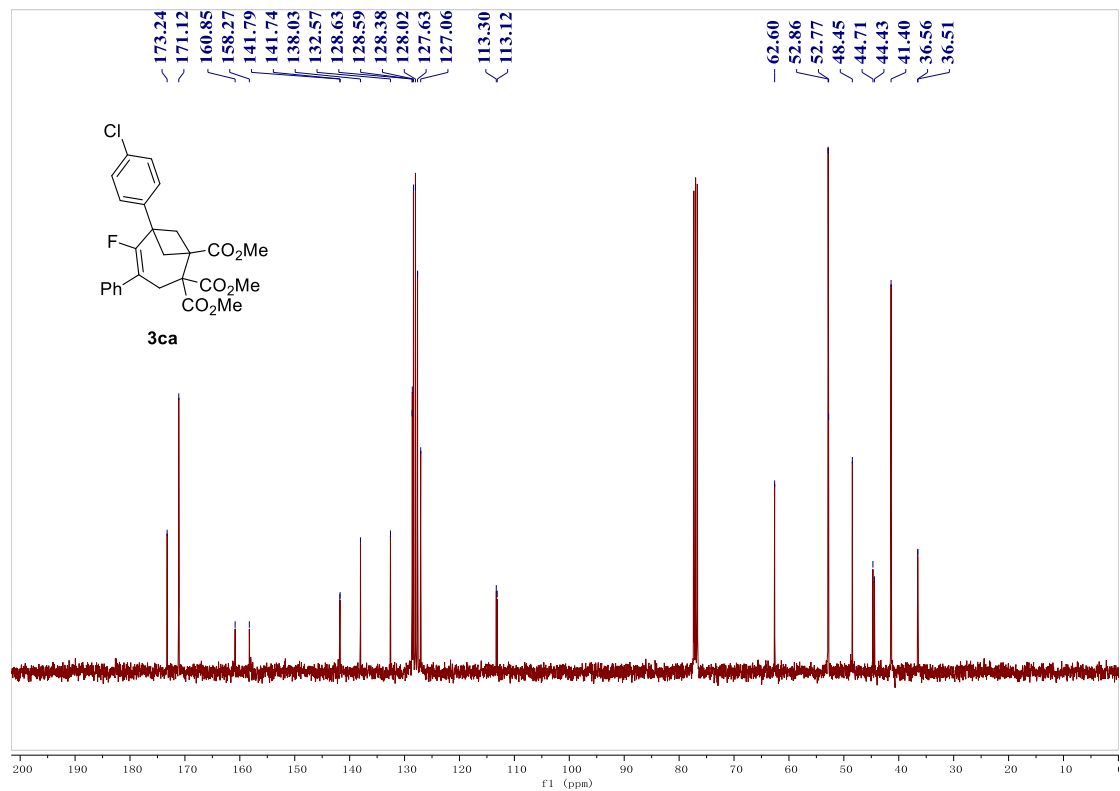

<sup>1</sup>H NMR (400MHz, CDCl<sub>3</sub>), <sup>19</sup>F NMR (376 MHz, CDCl<sub>3</sub>) and <sup>13</sup>C NMR (100 MHz, CDCl<sub>3</sub>) spectra of product **3da**

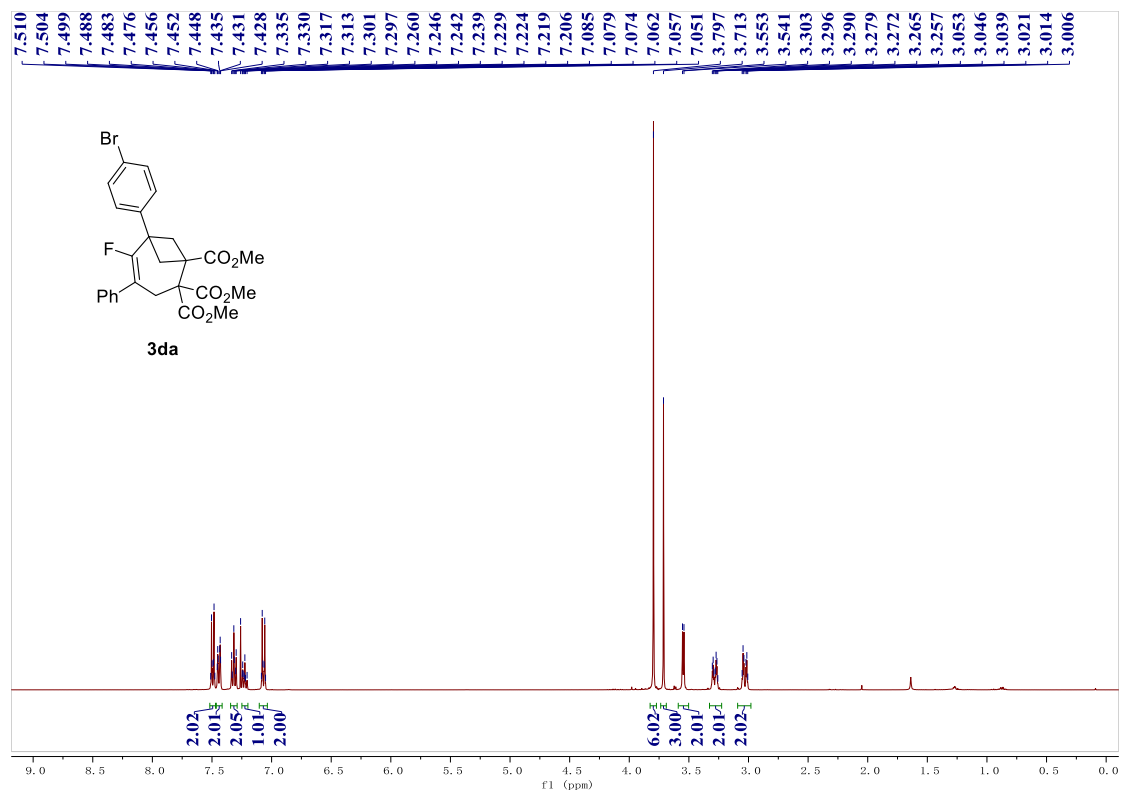

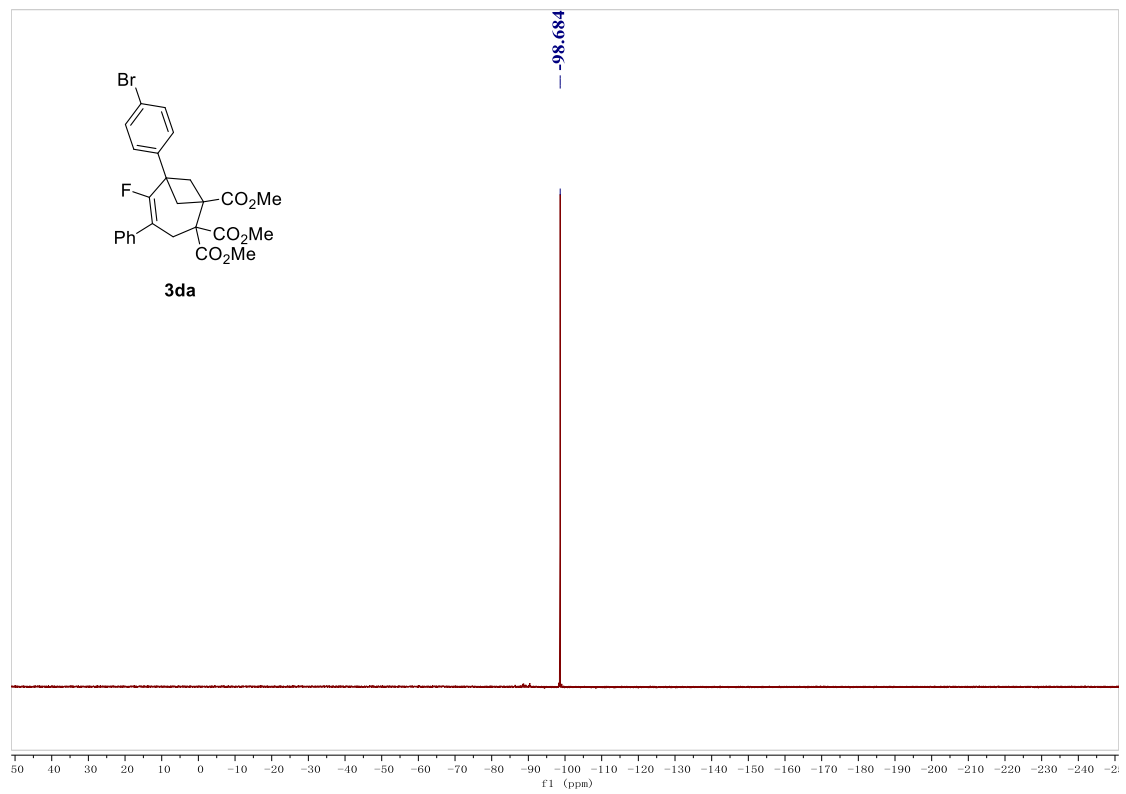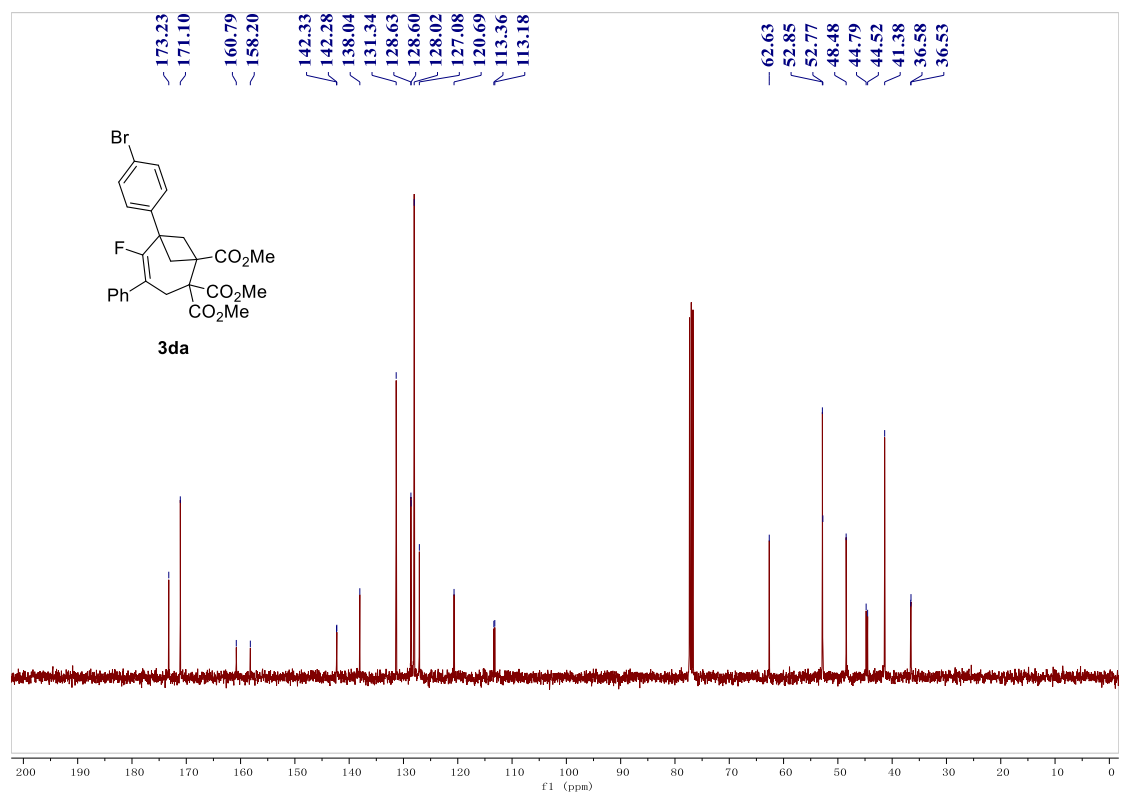

$^1\text{H}$  NMR (400MHz,  $\text{CDCl}_3$ ),  $^{19}\text{F}$  NMR (376 MHz,  $\text{CDCl}_3$ ) and  $^{13}\text{C}$  NMR (100 MHz,  $\text{CDCl}_3$ ) spectra of product **3ea**

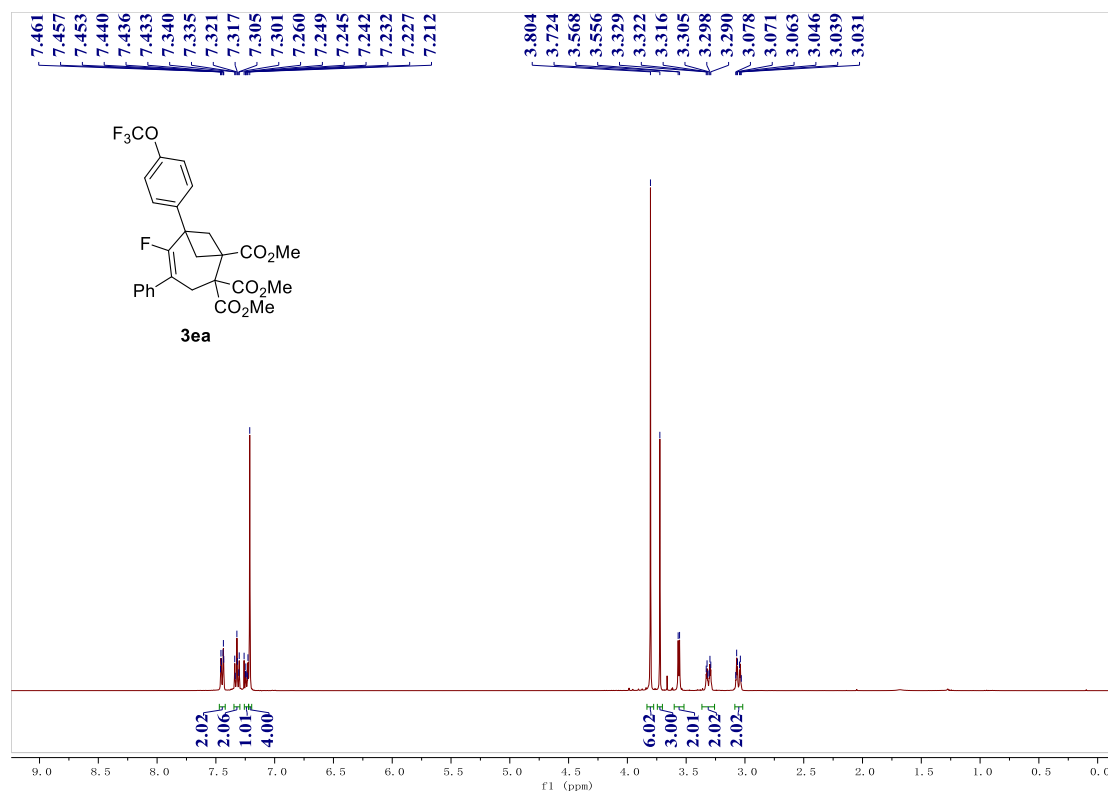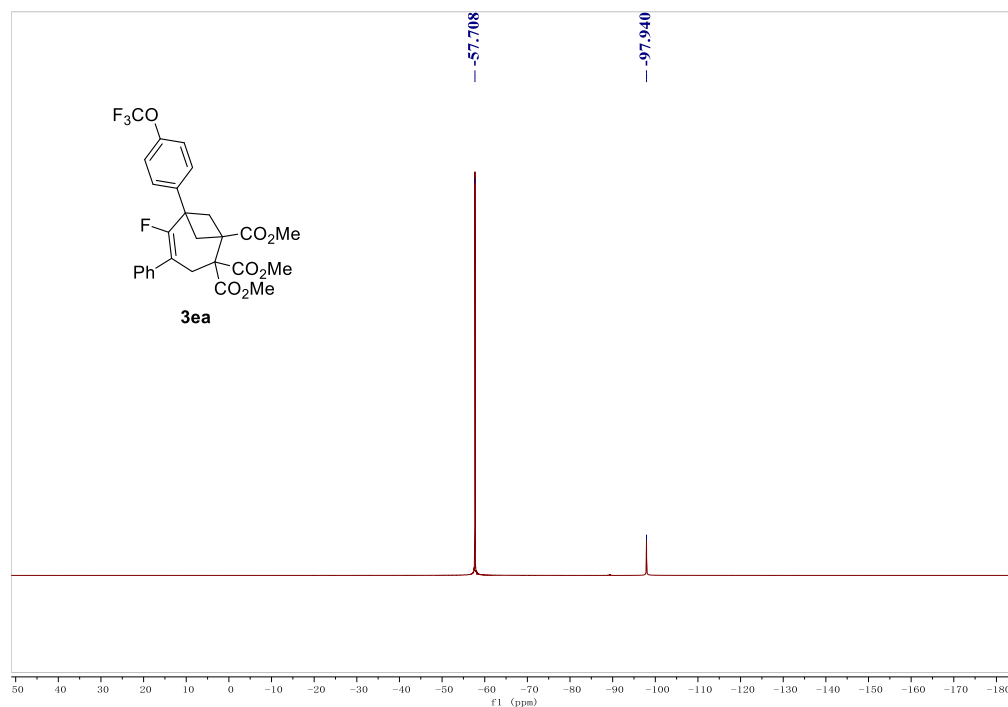

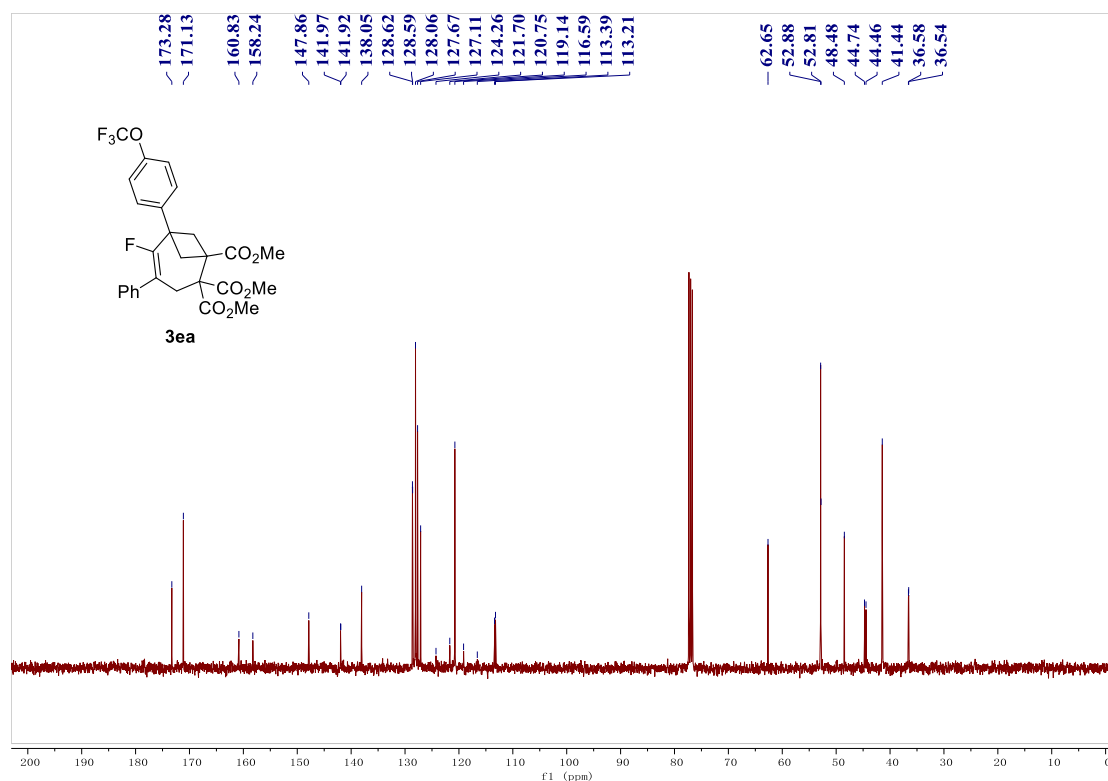

$^1\text{H}$  NMR (400MHz,  $\text{CDCl}_3$ ),  $^{19}\text{F}$  NMR (376 MHz,  $\text{CDCl}_3$ ) and  $^{13}\text{C}$  NMR (100 MHz,  $\text{CDCl}_3$ ) spectra of product **3fa**

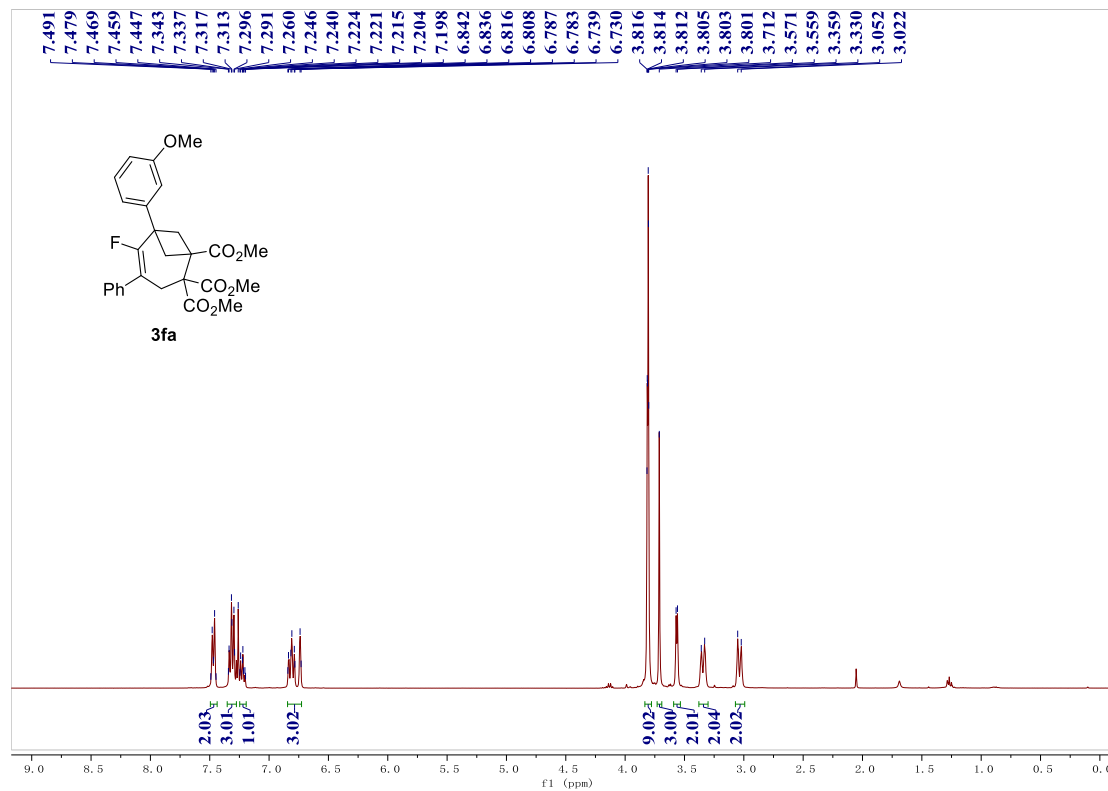

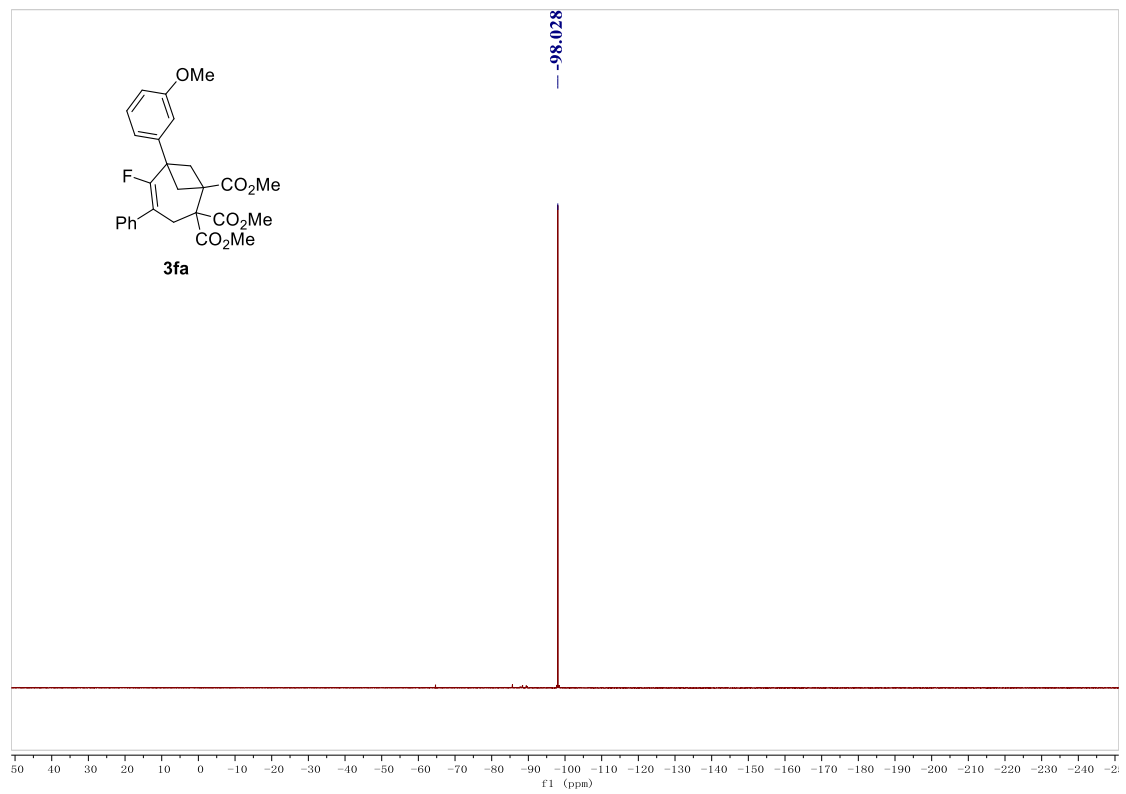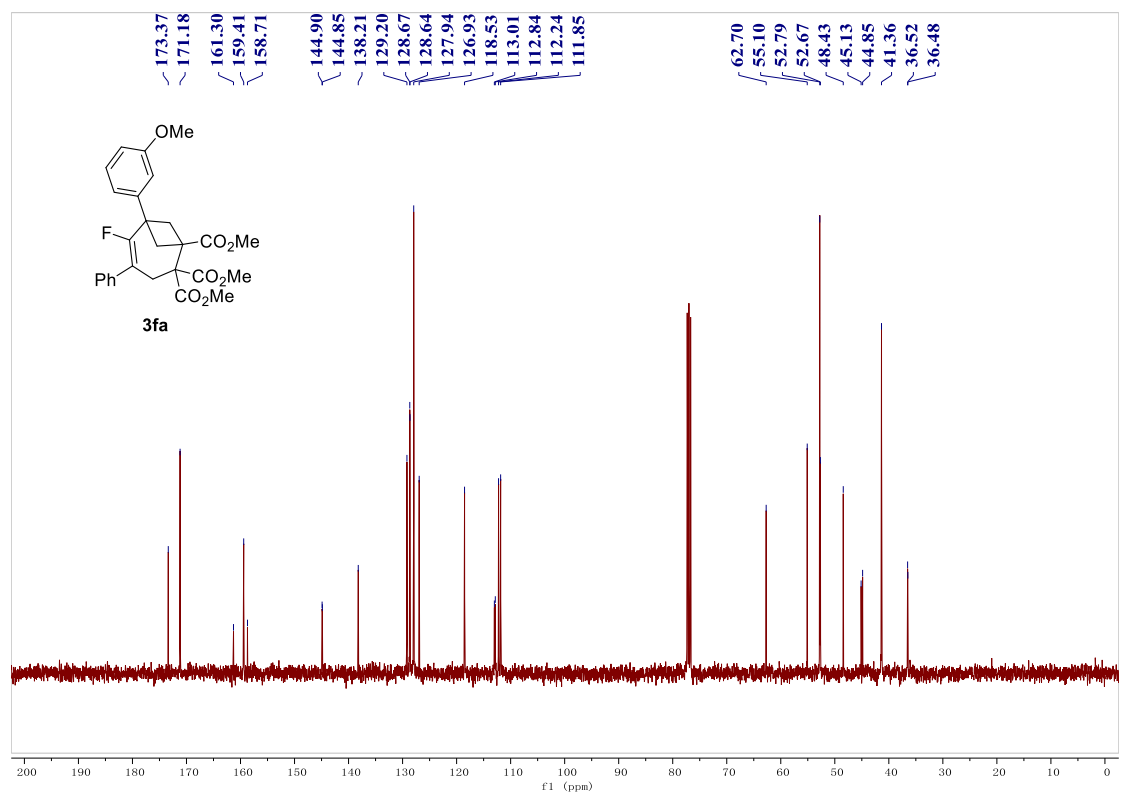

$^1\text{H}$  NMR (400MHz,  $\text{CDCl}_3$ ),  $^{19}\text{F}$  NMR (376 MHz,  $\text{CDCl}_3$ ) and  $^{13}\text{C}$  NMR (100 MHz,  $\text{CDCl}_3$ ) spectra of product **3ga**

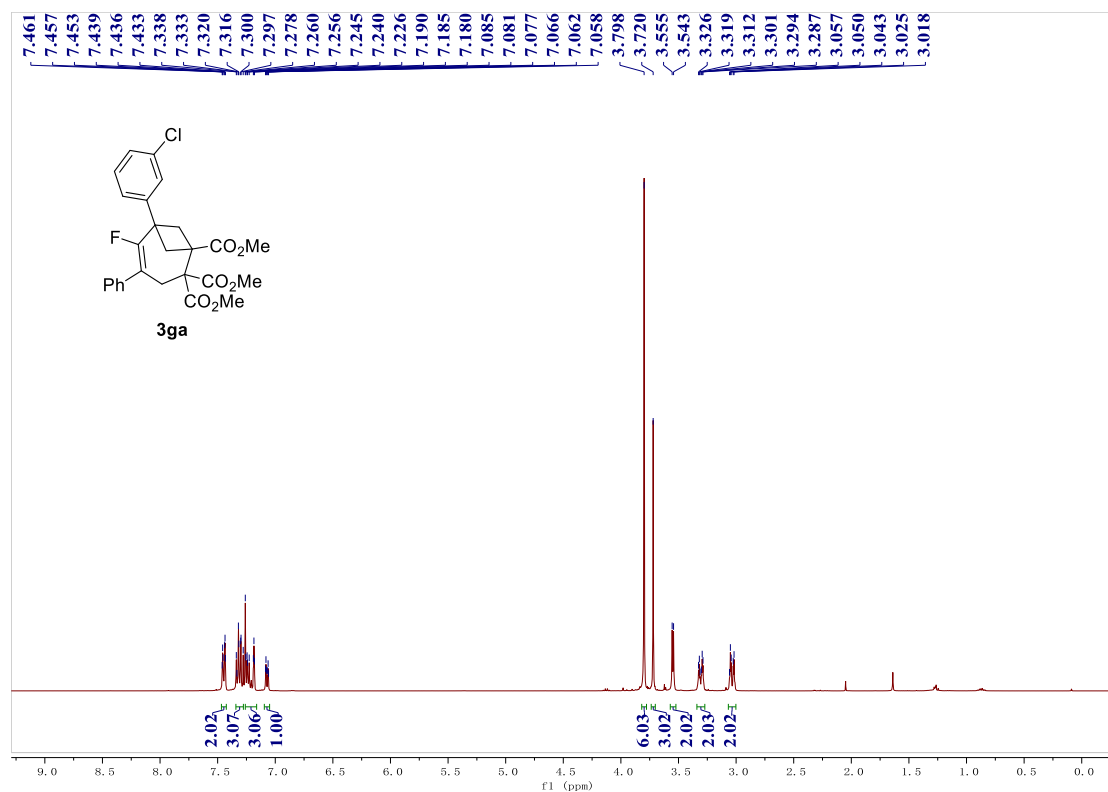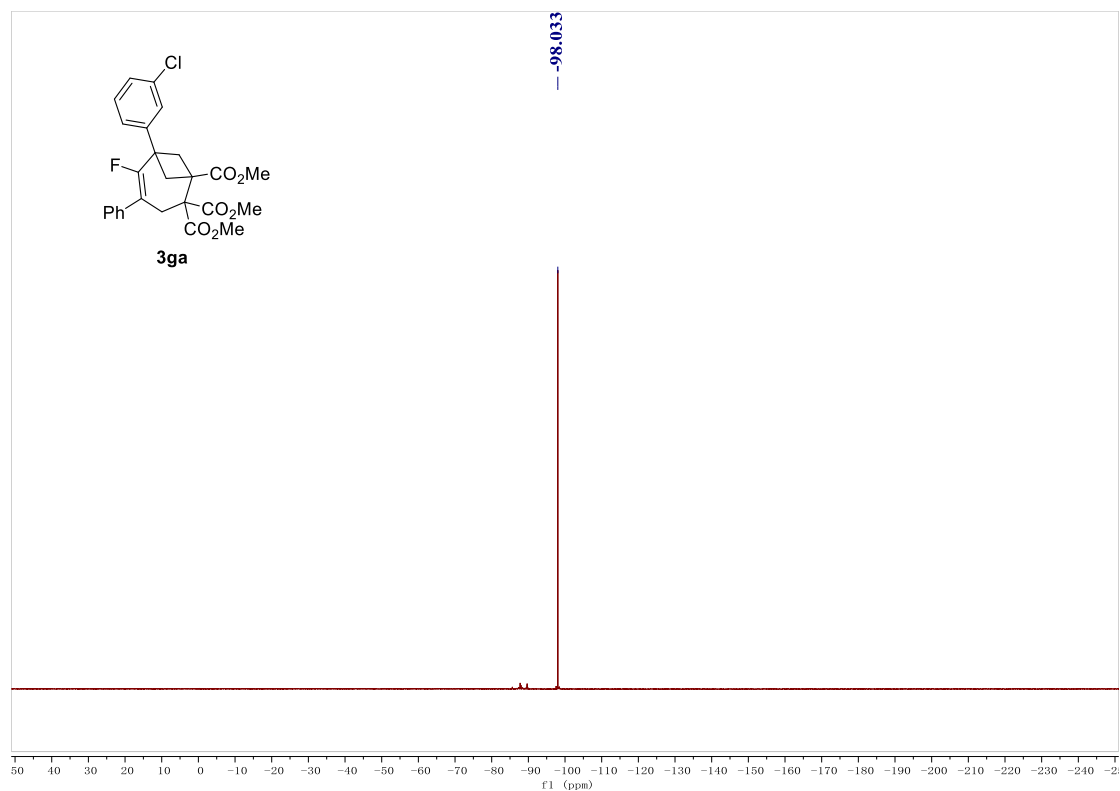



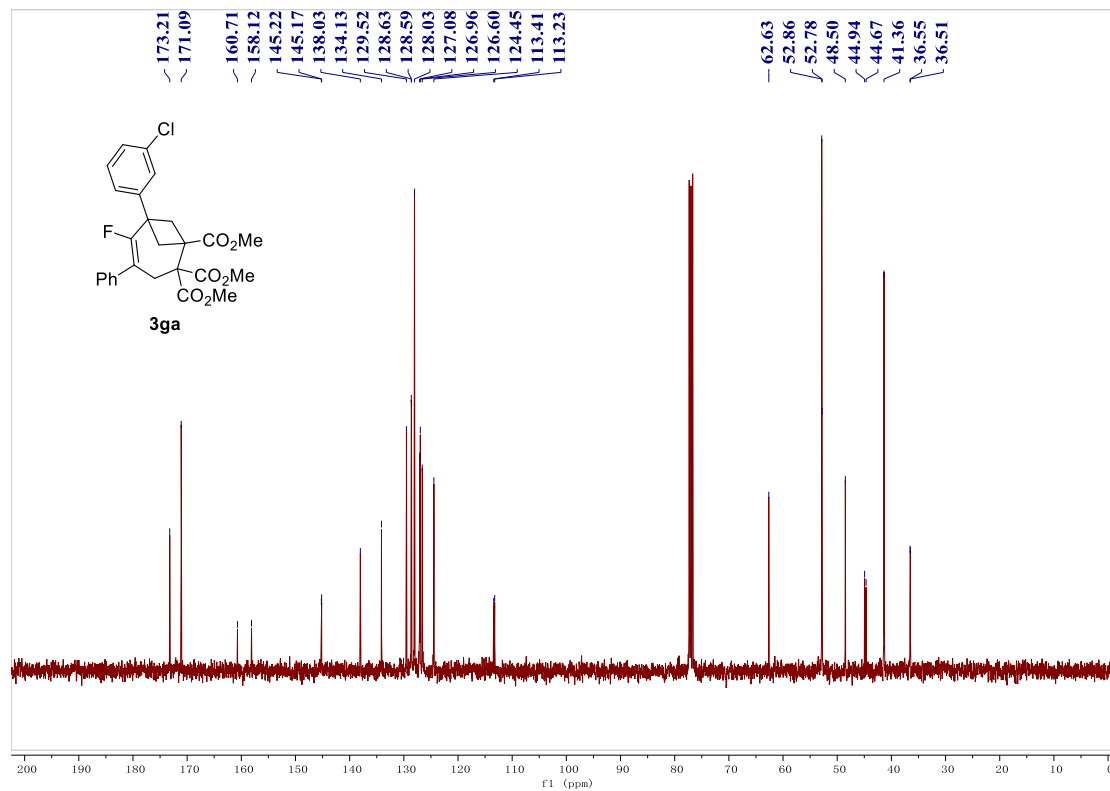

<sup>1</sup>H NMR (400MHz, CDCl<sub>3</sub>), <sup>19</sup>F NMR (376 MHz, CDCl<sub>3</sub>) and <sup>13</sup>C NMR (100 MHz, CDCl<sub>3</sub>) spectra of product **3ha**

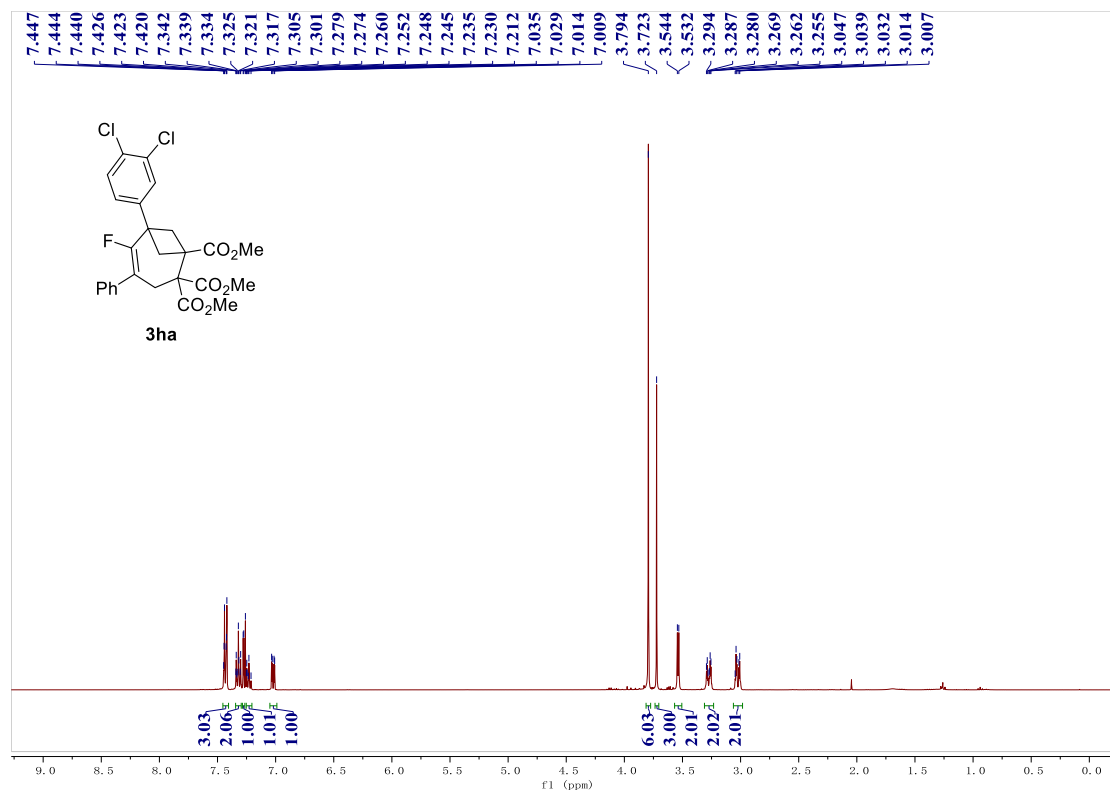

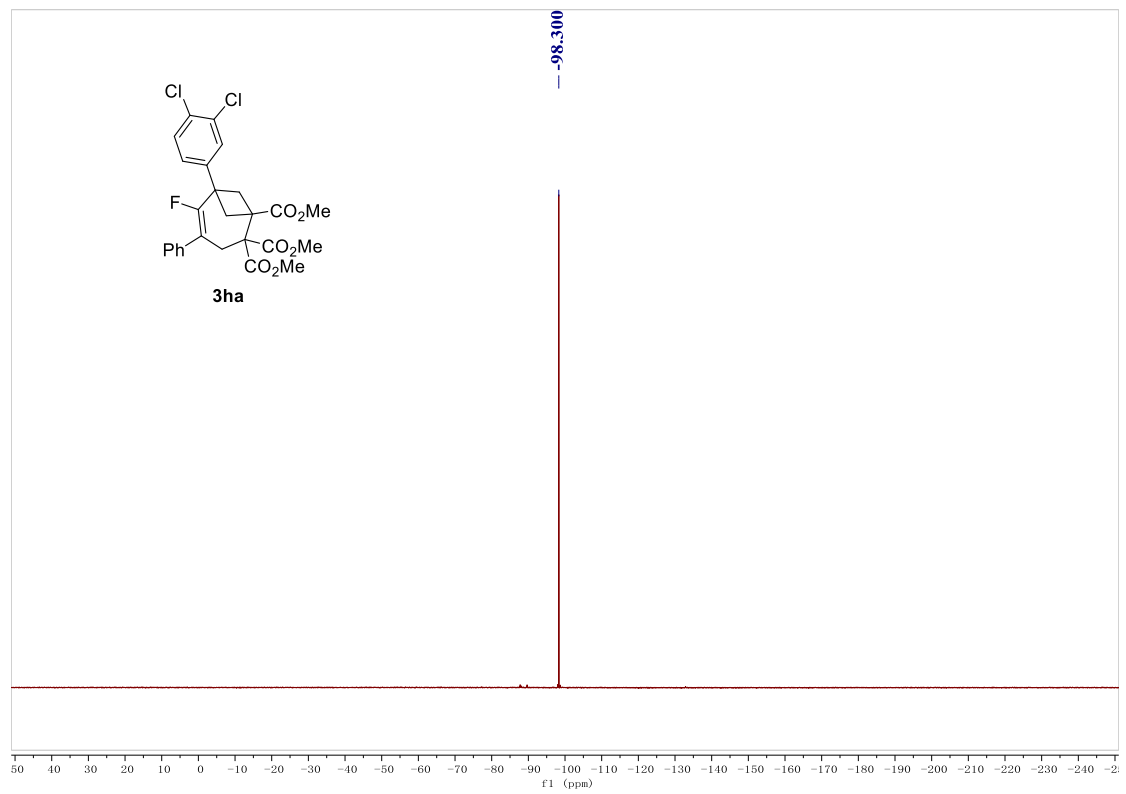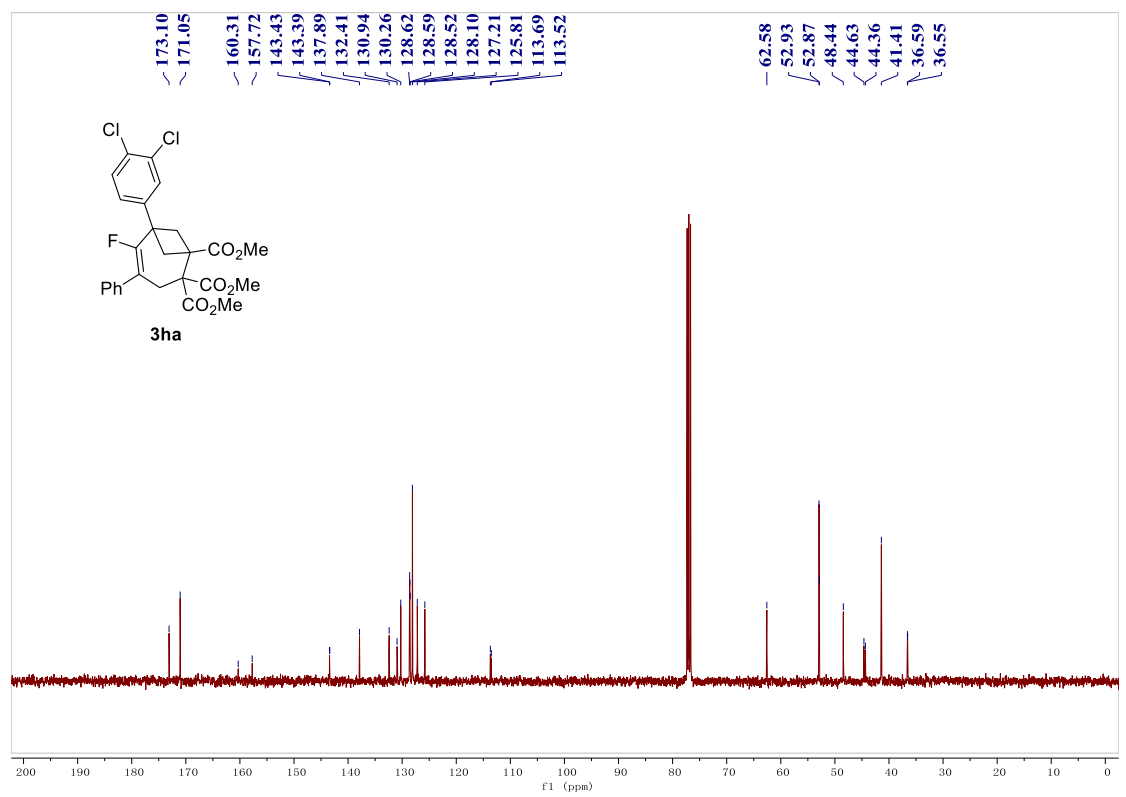

$^1\text{H}$  NMR (400MHz,  $\text{CDCl}_3$ ),  $^{19}\text{F}$  NMR (376 MHz,  $\text{CDCl}_3$ ) and  $^{13}\text{C}$  NMR (100 MHz,  $\text{CDCl}_3$ ) spectra of product **3ia**

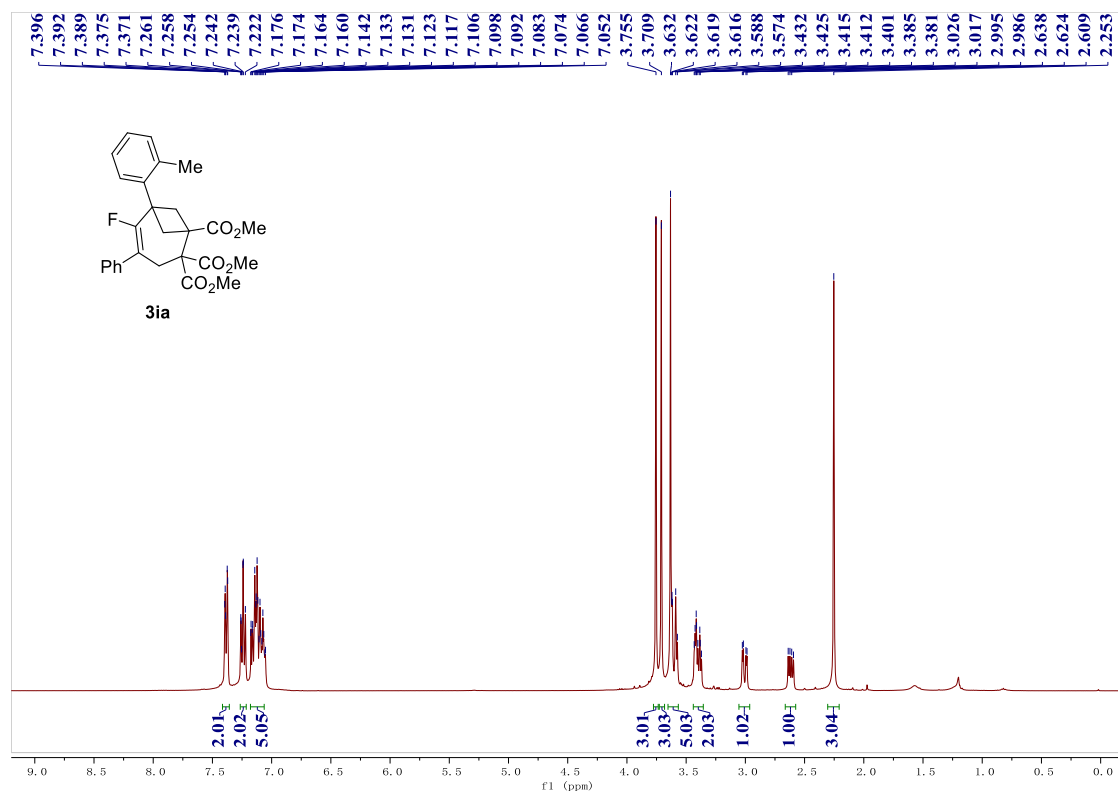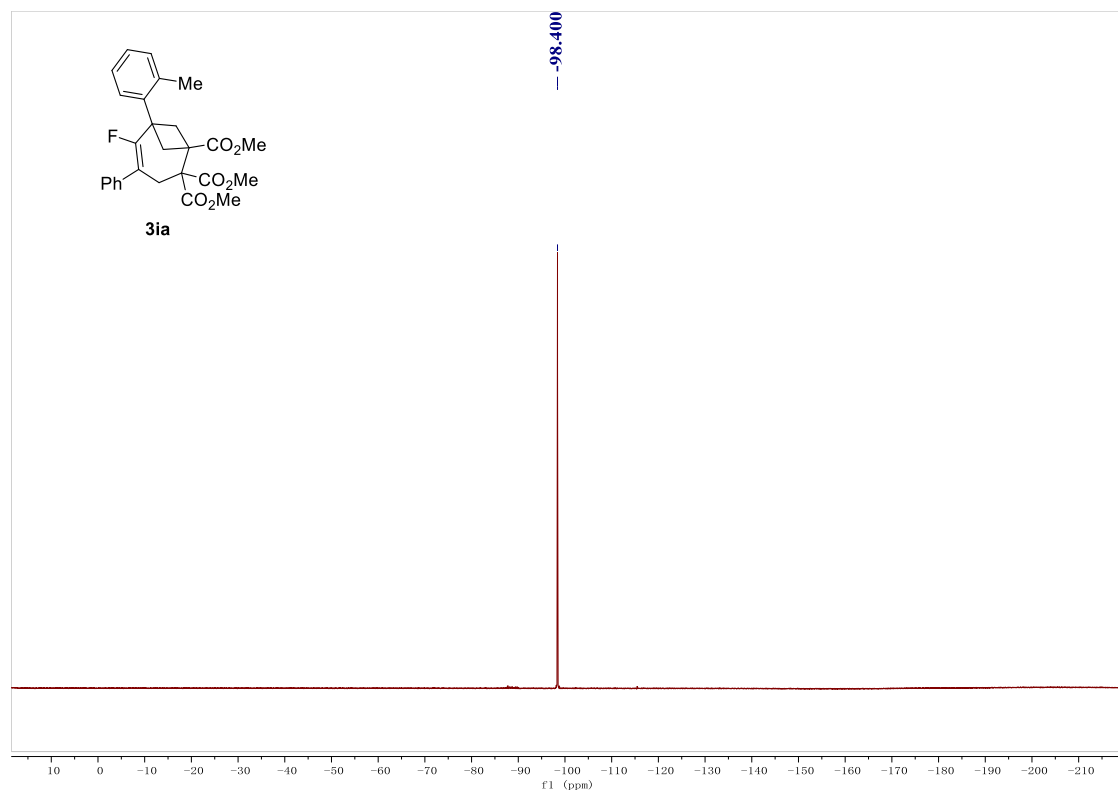

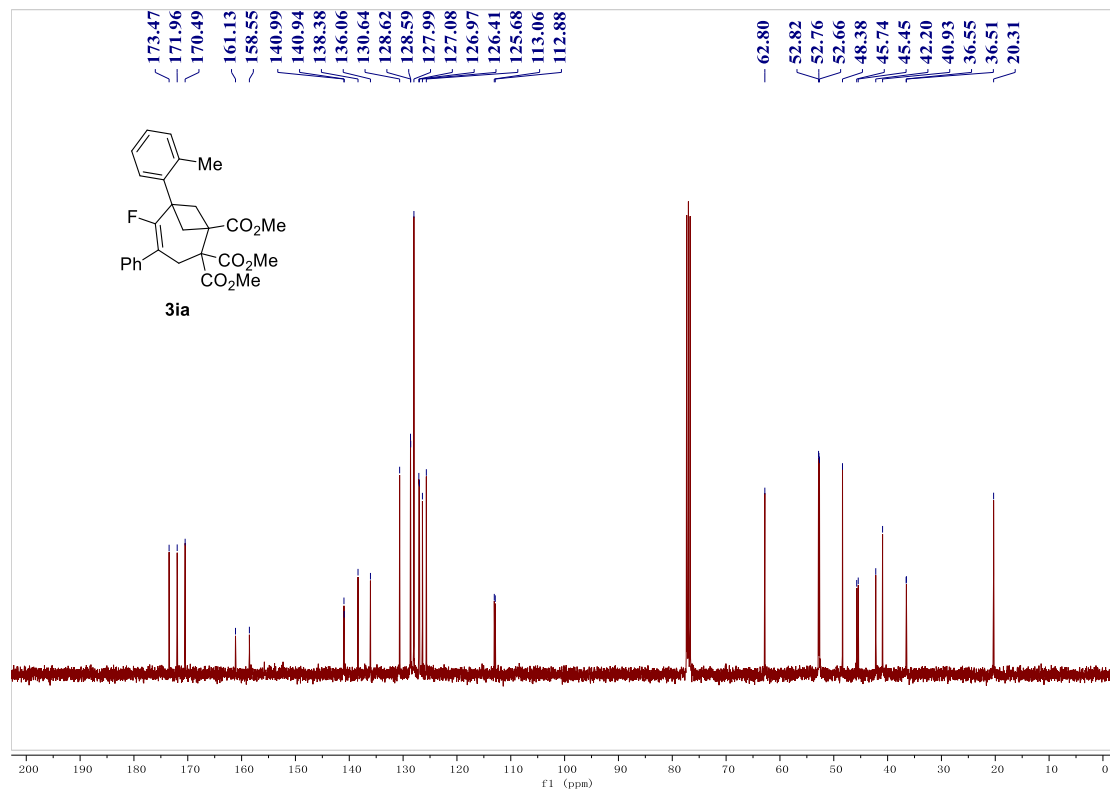

<sup>1</sup>H NMR (400MHz, CDCl<sub>3</sub>), <sup>19</sup>F NMR (376 MHz, CDCl<sub>3</sub>) and <sup>13</sup>C NMR (100 MHz, CDCl<sub>3</sub>) spectra of product **3ja**

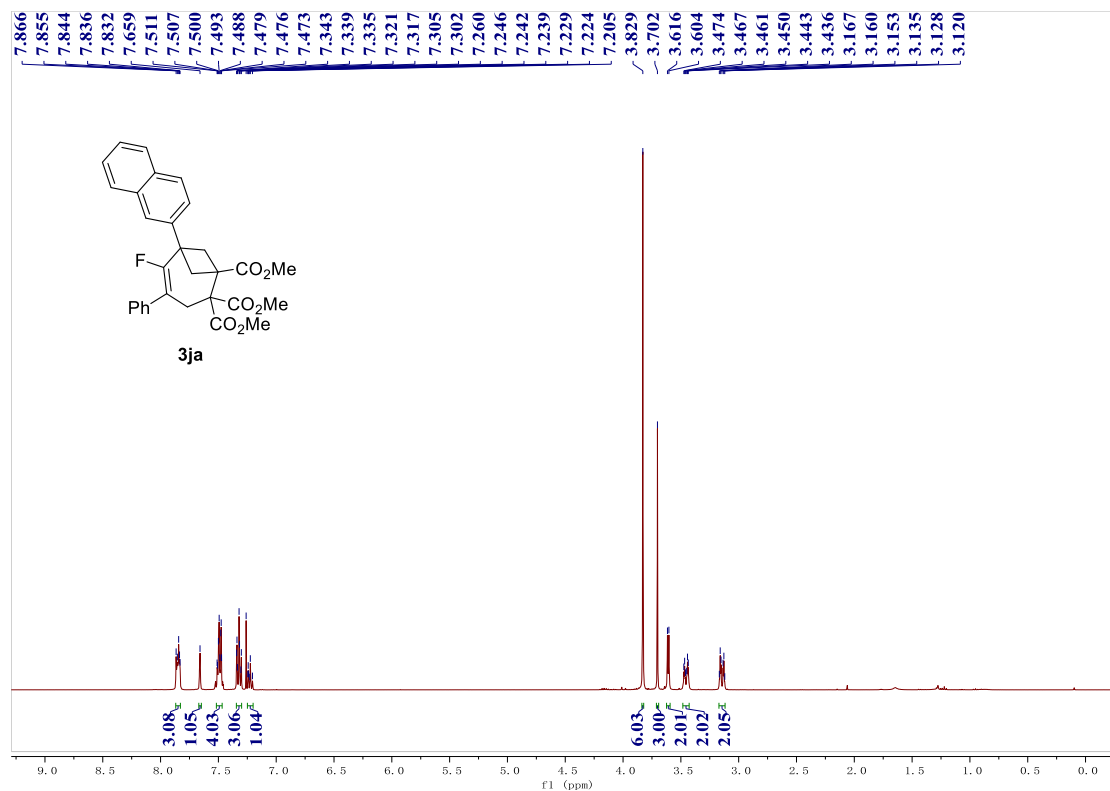

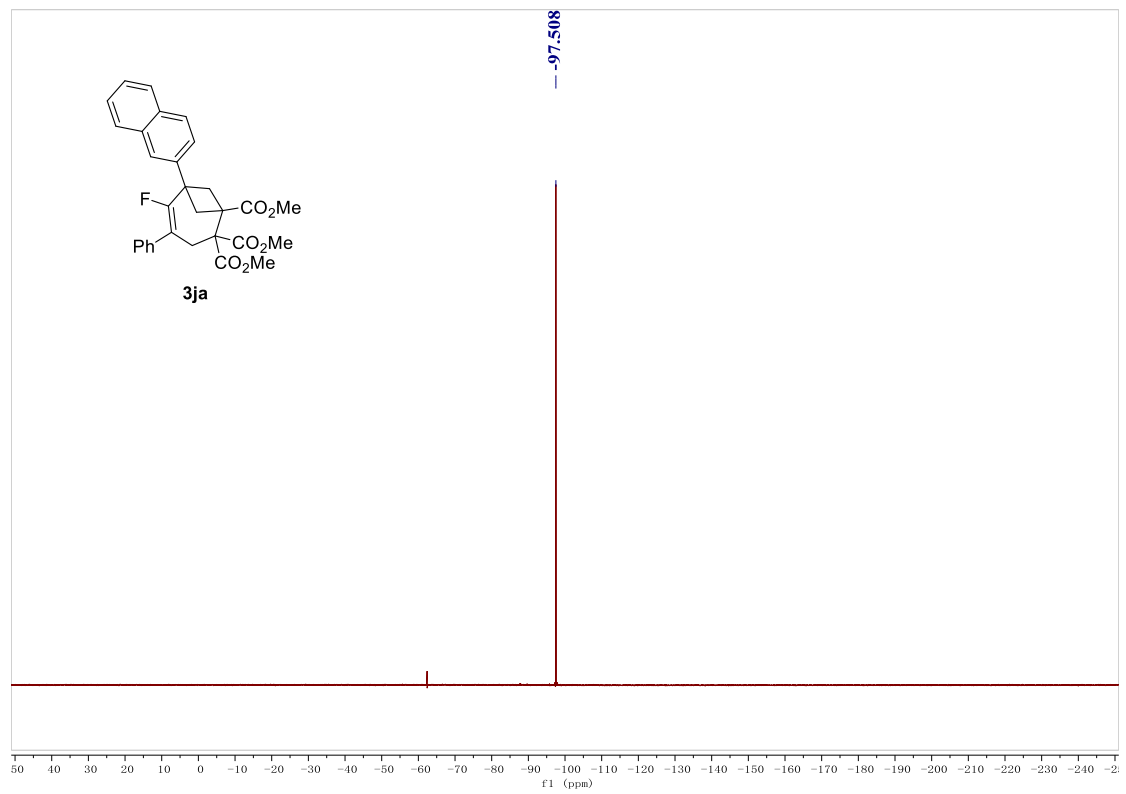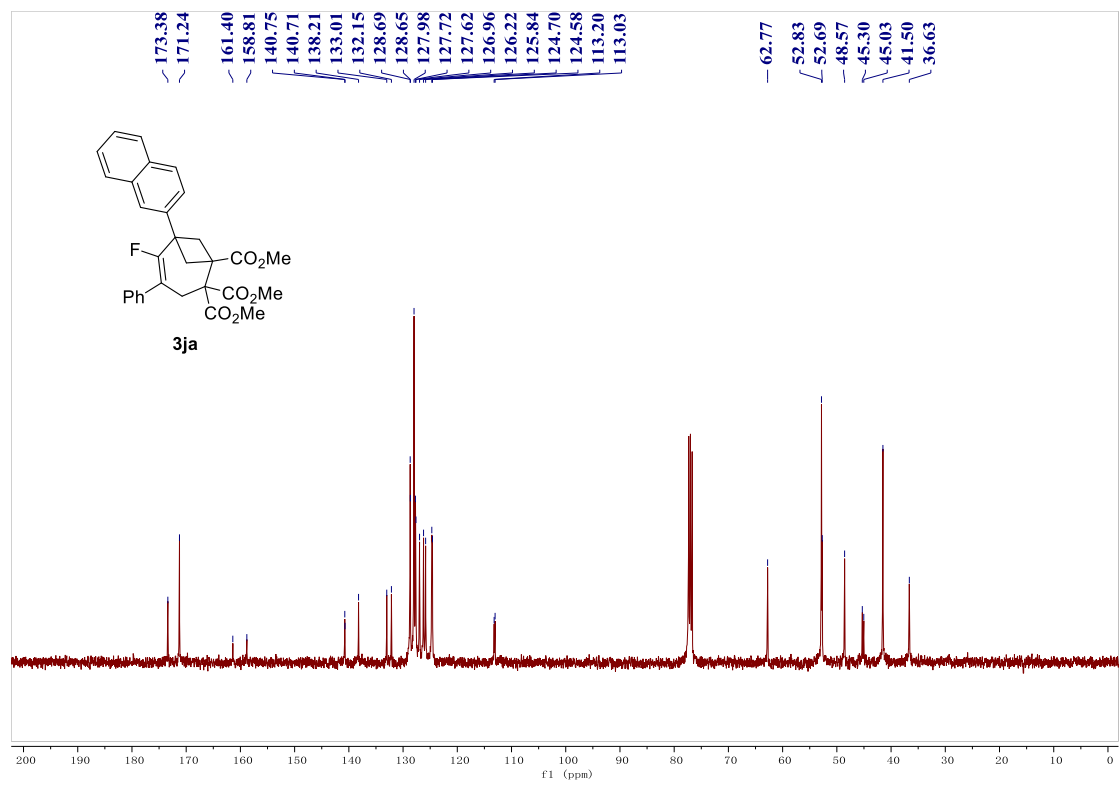

$^1\text{H}$  NMR (400MHz,  $\text{CDCl}_3$ ),  $^{19}\text{F}$  NMR (376 MHz,  $\text{CDCl}_3$ ) and  $^{13}\text{C}$  NMR (100 MHz,  $\text{CDCl}_3$ ) spectra of product **3ka**

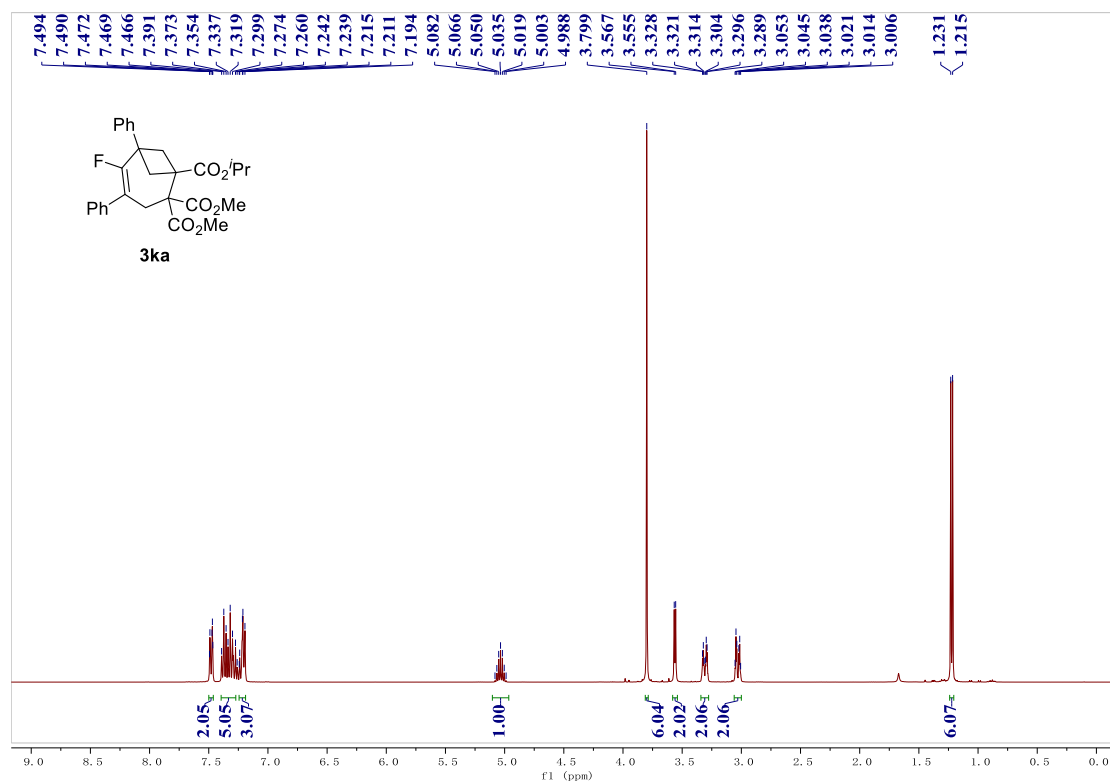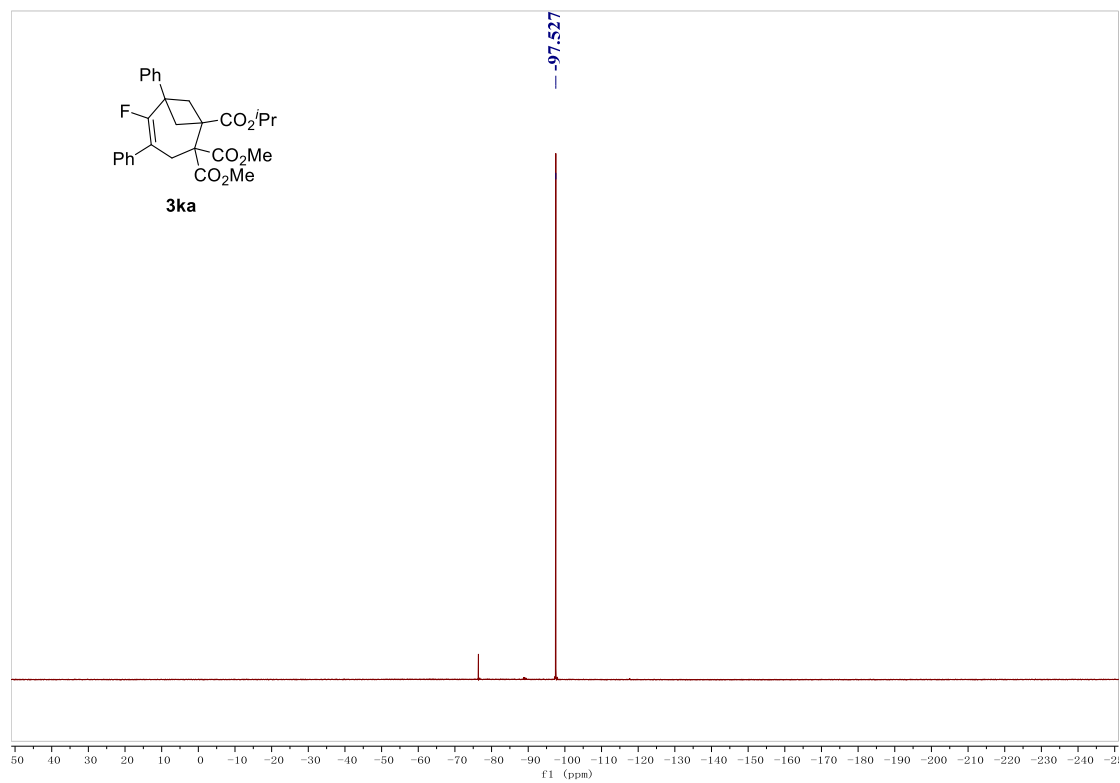

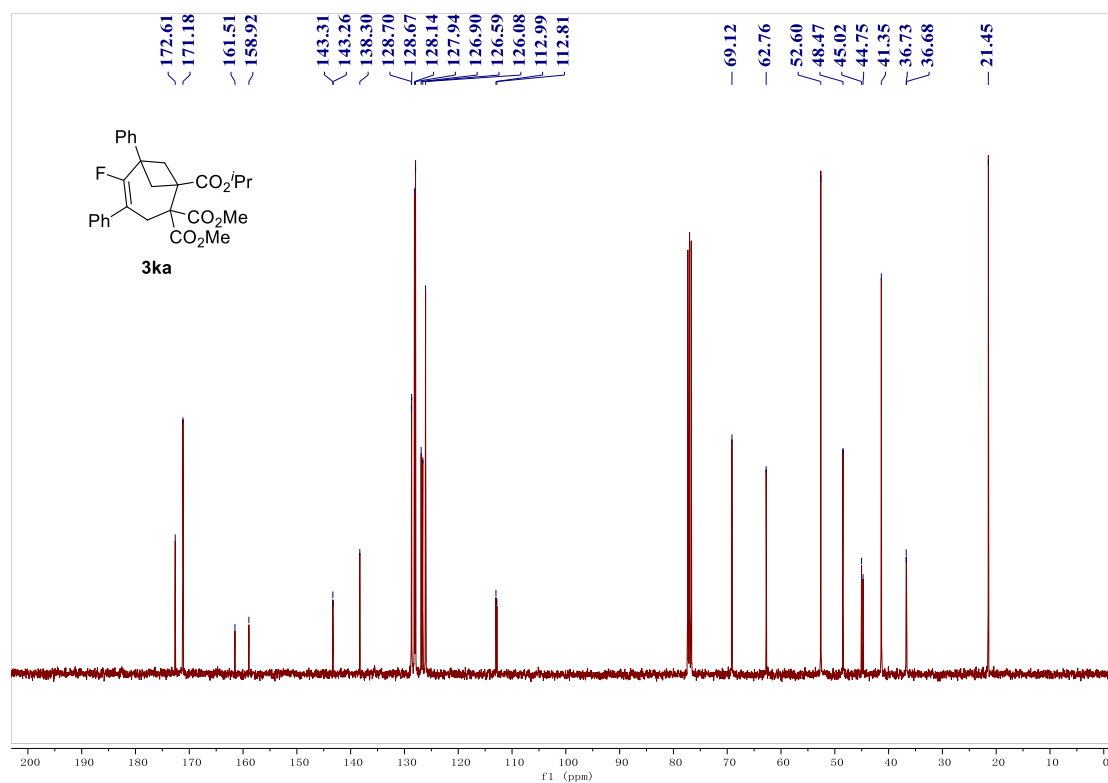

$^1\text{H}$  NMR (400MHz,  $\text{CDCl}_3$ ),  $^{19}\text{F}$  NMR (376 MHz,  $\text{CDCl}_3$ ) and  $^{13}\text{C}$  NMR (100 MHz,  $\text{CDCl}_3$ ) spectra of product **3la**

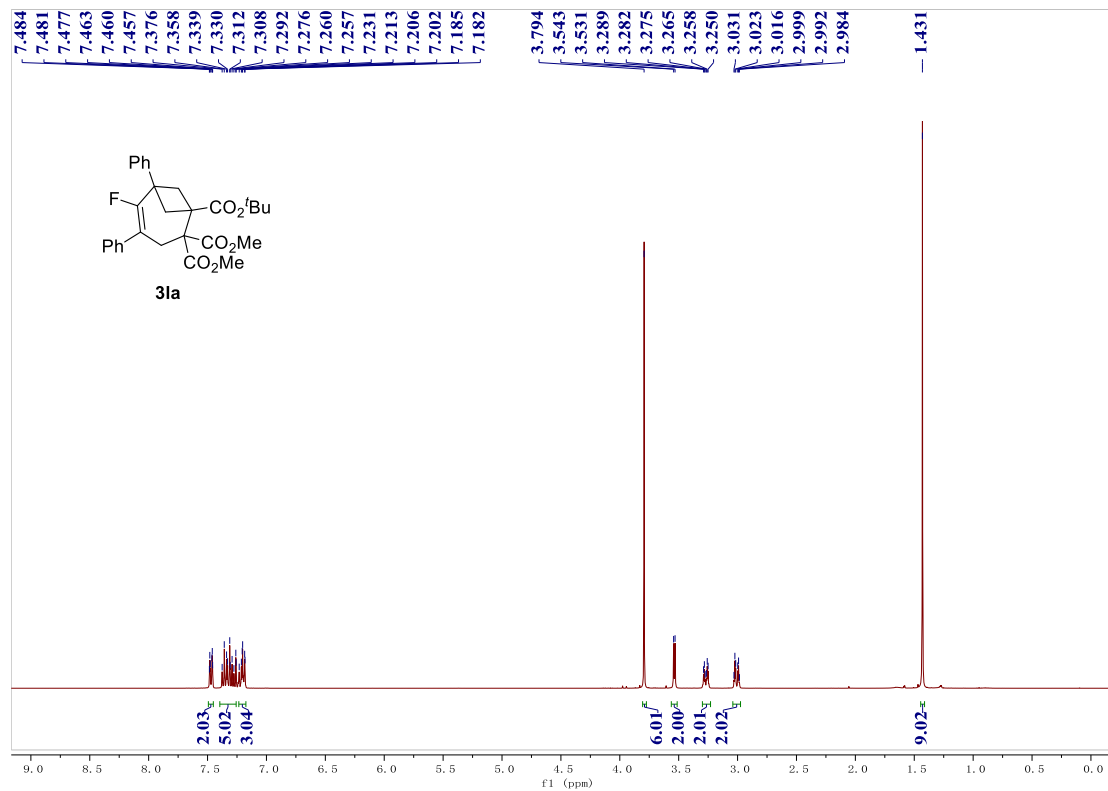

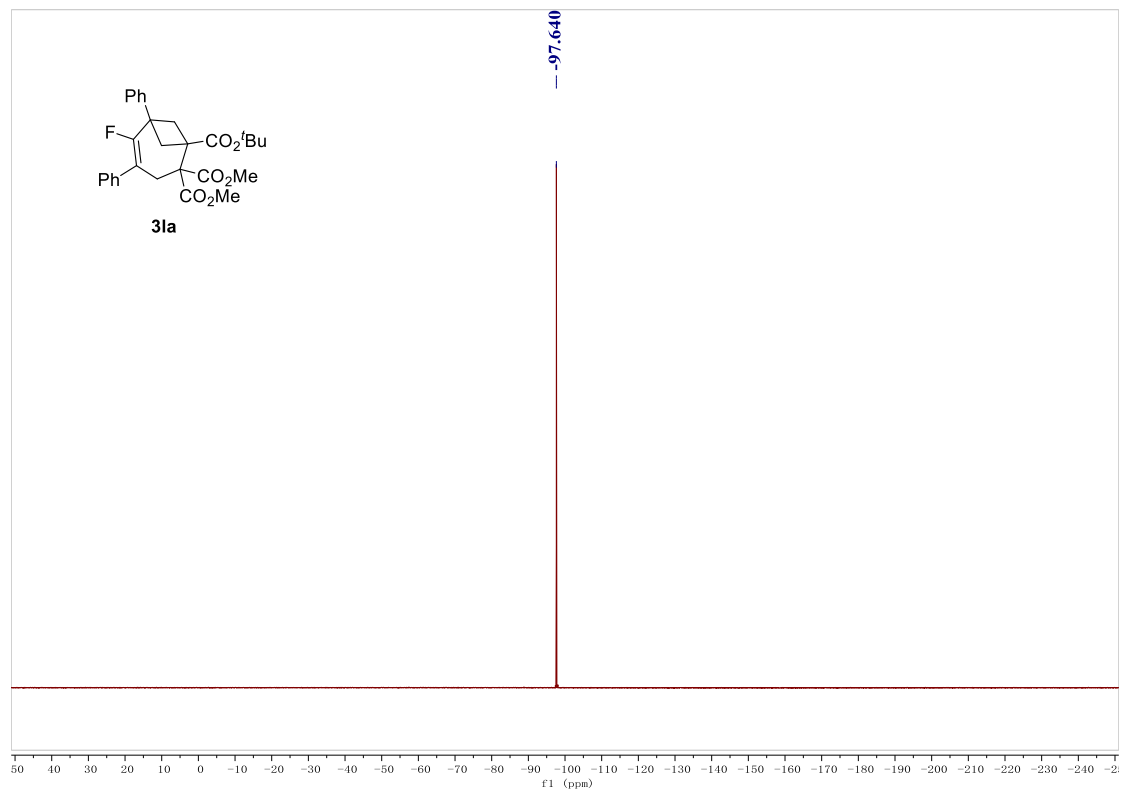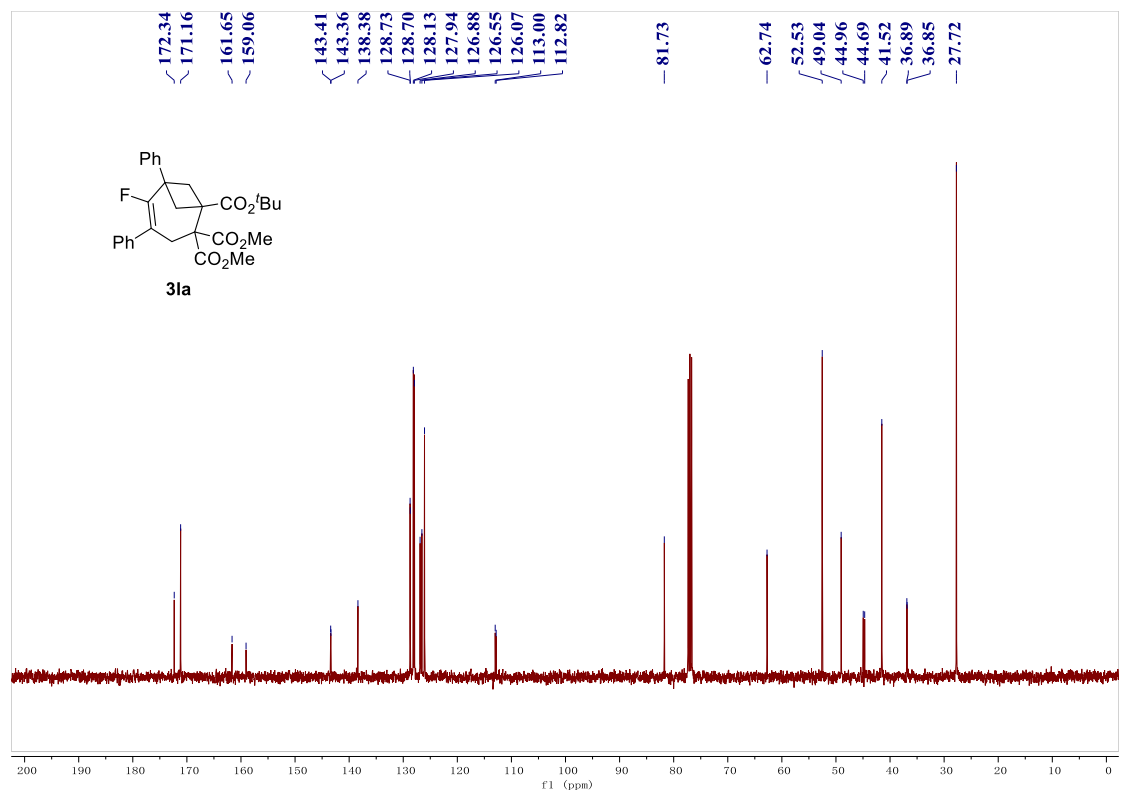



$^1\text{H}$  NMR (400MHz,  $\text{CDCl}_3$ ),  $^{19}\text{F}$  NMR (376 MHz,  $\text{CDCl}_3$ ) and  $^{13}\text{C}$  NMR (100 MHz,  $\text{CDCl}_3$ ) spectra of product **3ma**

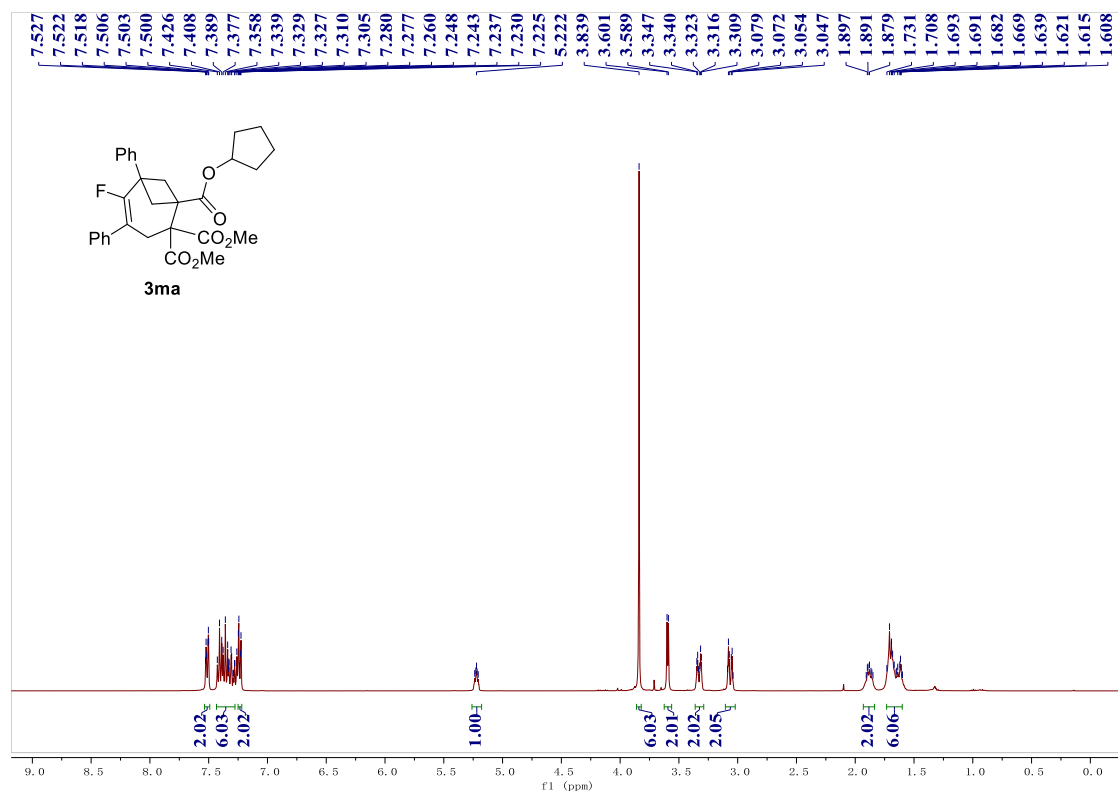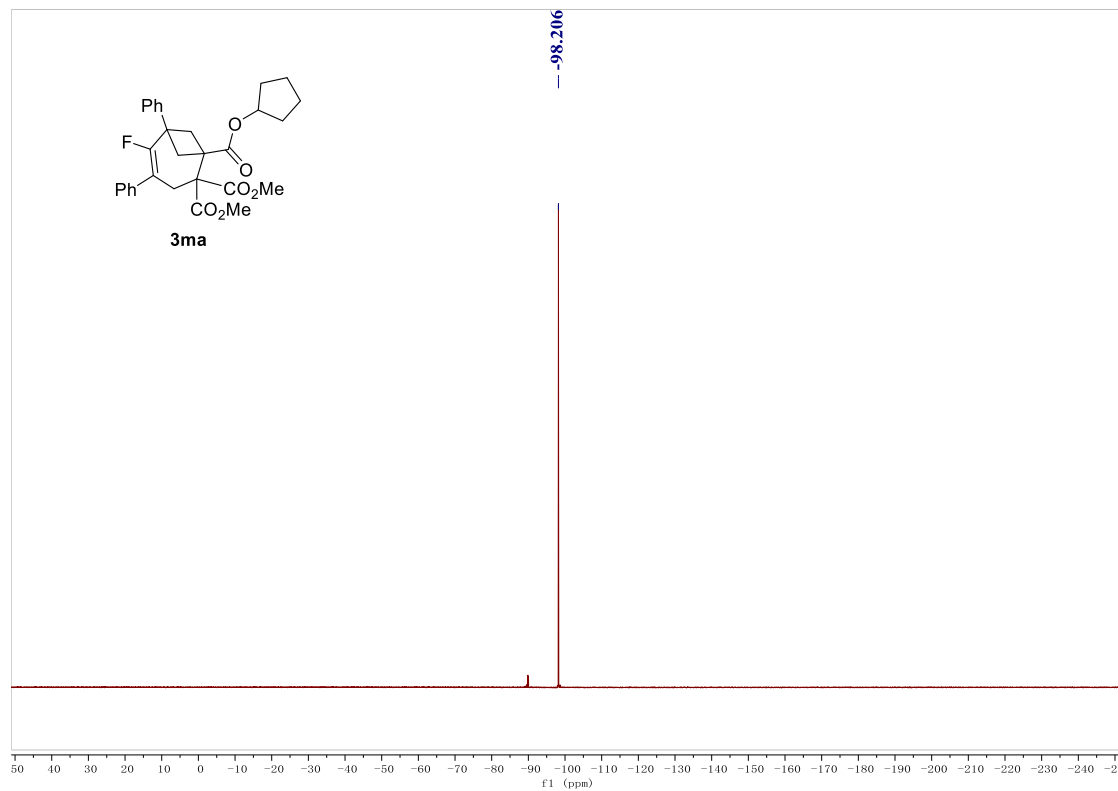

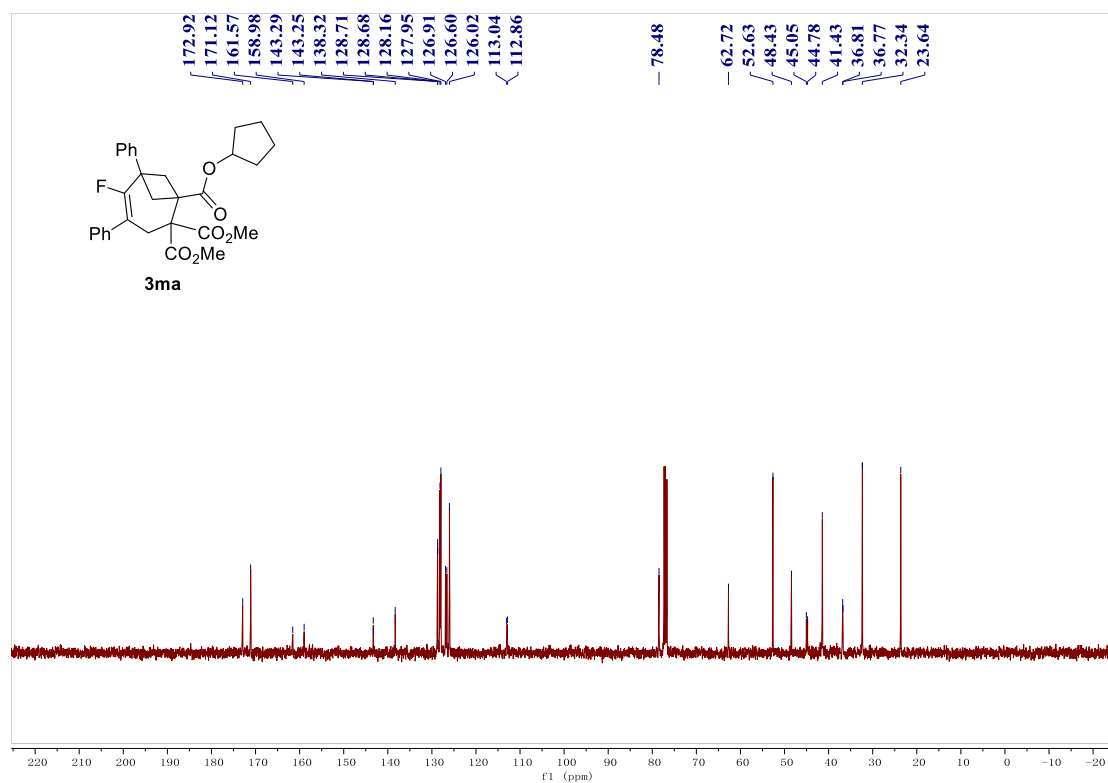

$^1\text{H}$  NMR (400MHz,  $\text{CDCl}_3$ ),  $^{19}\text{F}$  NMR (376 MHz,  $\text{CDCl}_3$ ) and  $^{13}\text{C}$  NMR (100 MHz,  $\text{CDCl}_3$ ) spectra of product **3na**

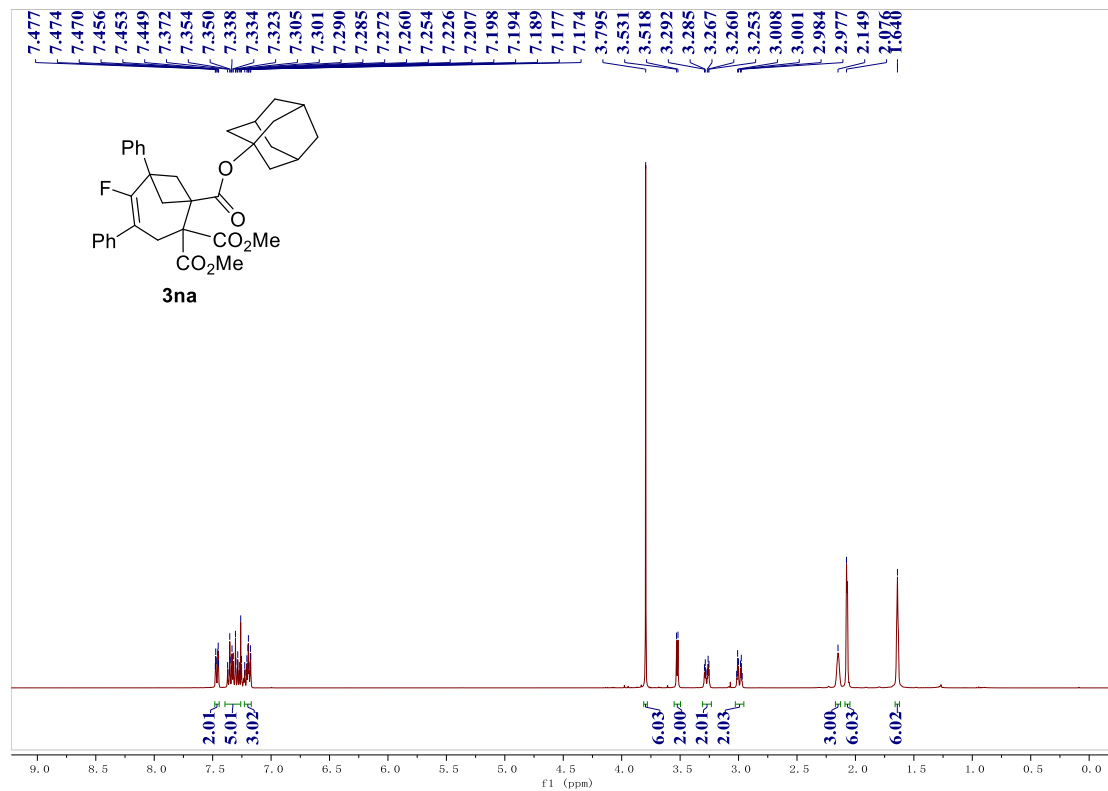

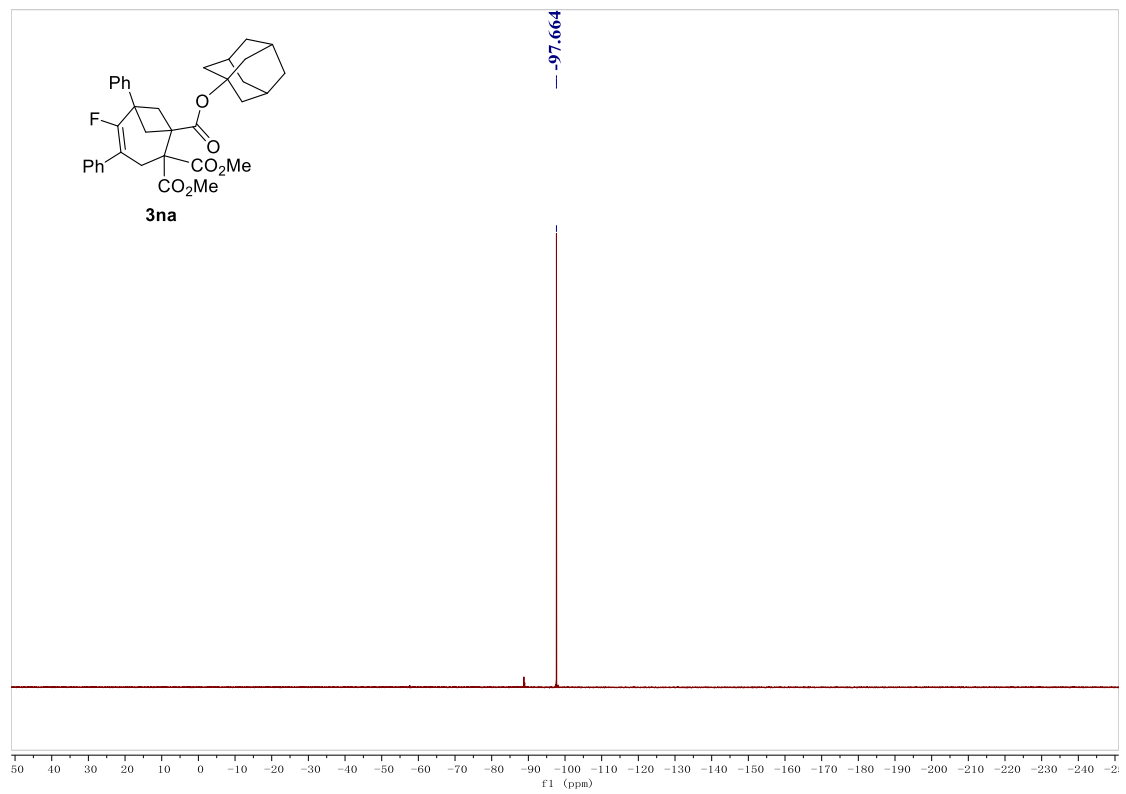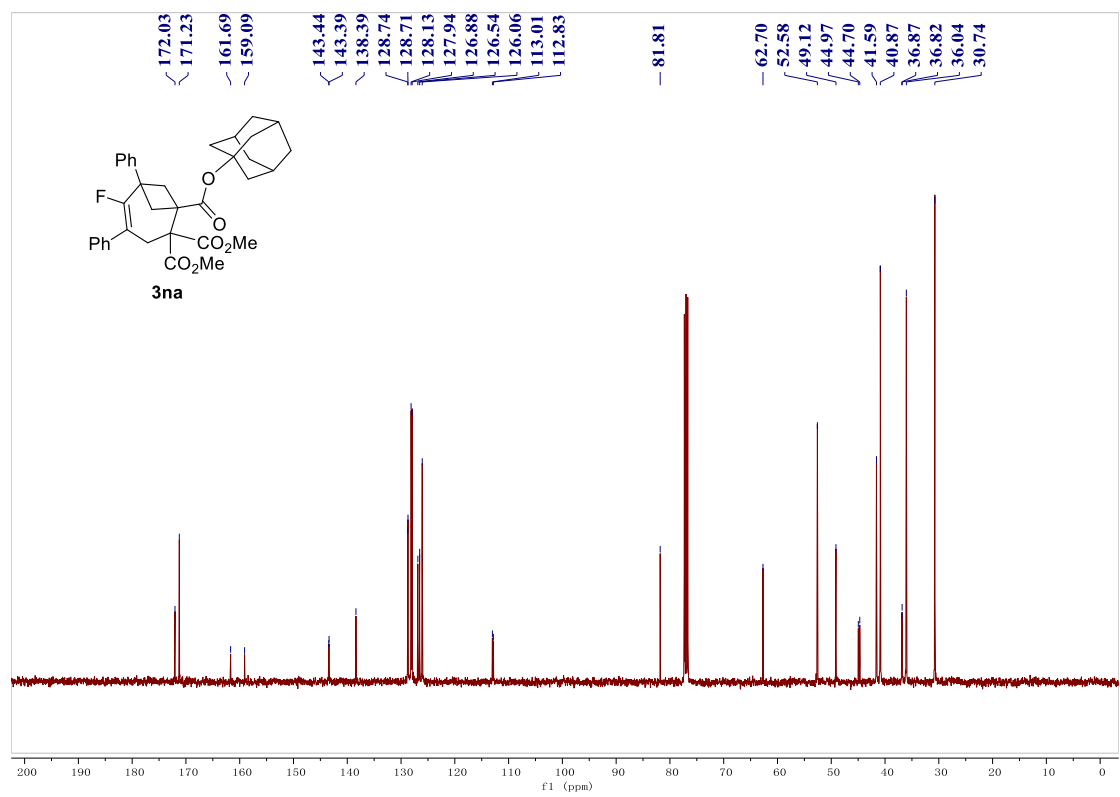

$^1\text{H}$  NMR (400MHz,  $\text{CDCl}_3$ ),  $^{19}\text{F}$  NMR (376 MHz,  $\text{CDCl}_3$ ) and  $^{13}\text{C}$  NMR (100 MHz,  $\text{CDCl}_3$ ) spectra of product **30a**

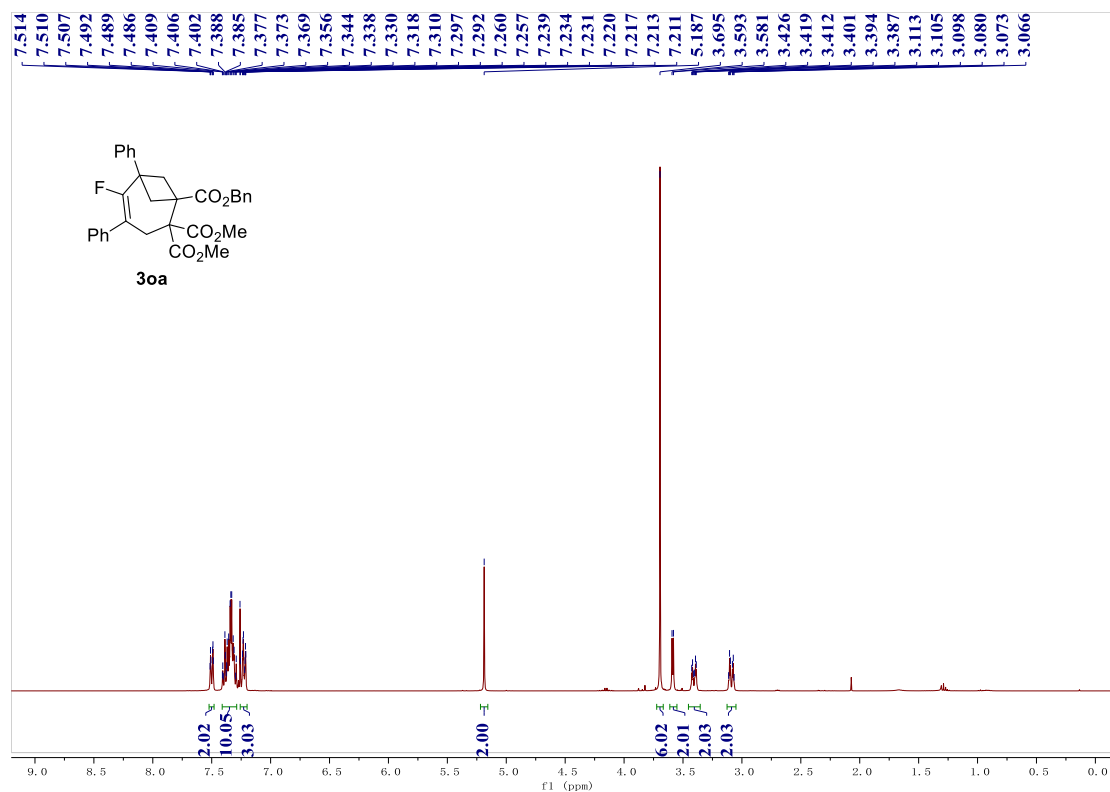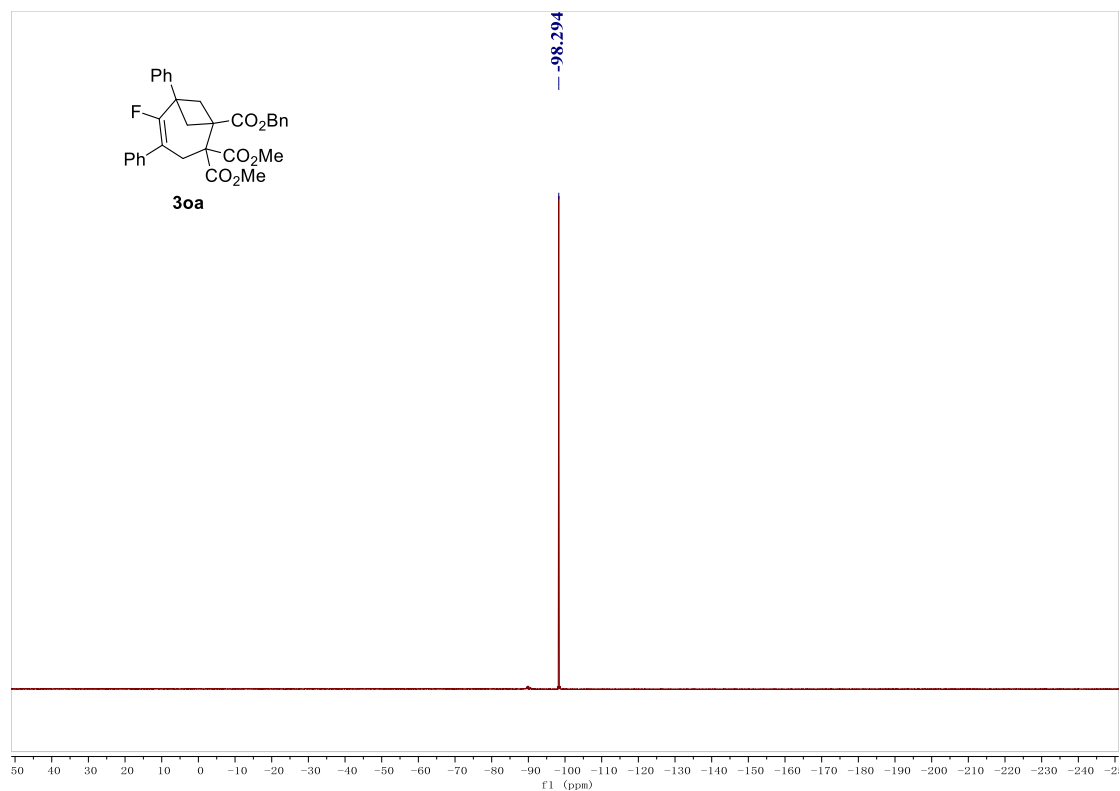

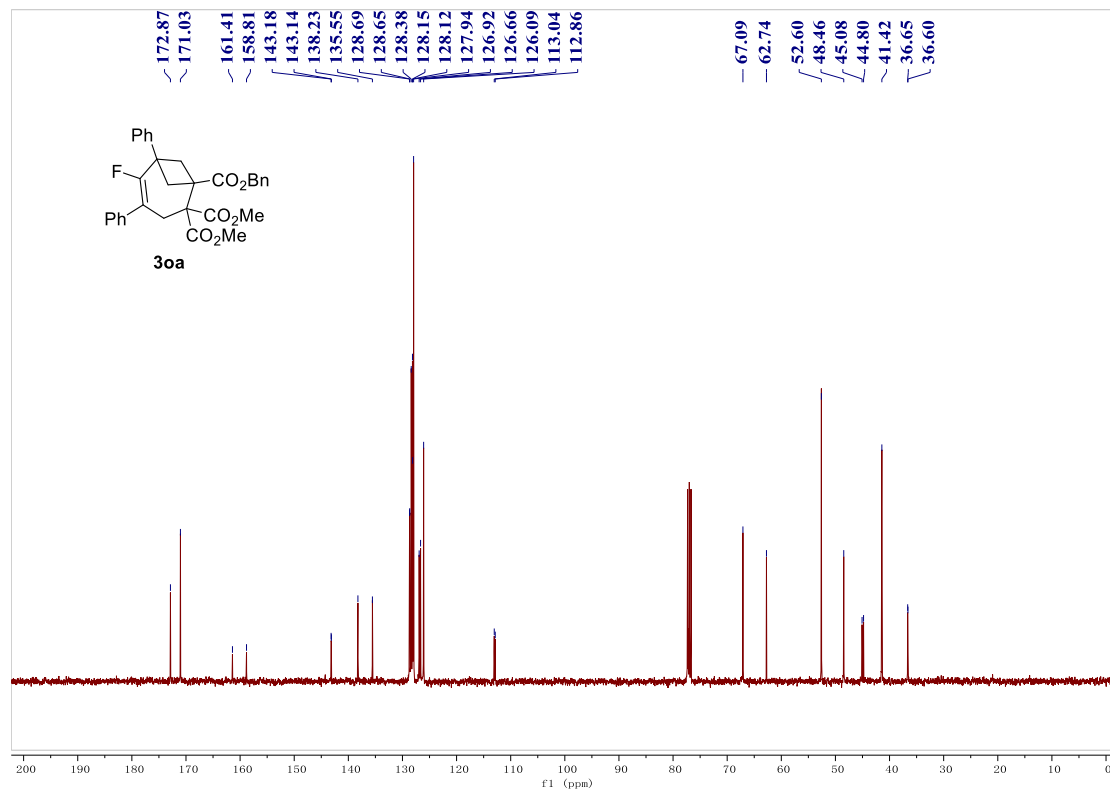

<sup>1</sup>H NMR (400MHz, CDCl<sub>3</sub>), <sup>19</sup>F NMR (376 MHz, CDCl<sub>3</sub>) and <sup>13</sup>C NMR (100 MHz, CDCl<sub>3</sub>) spectra of product **30a**

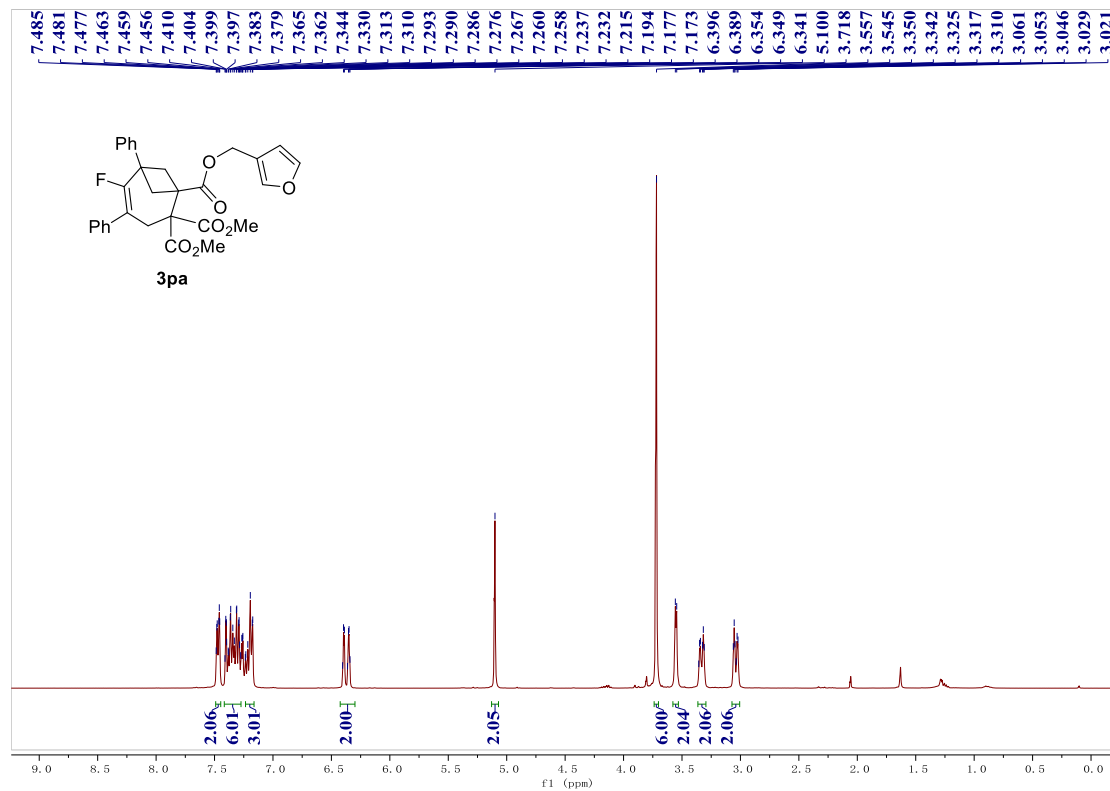

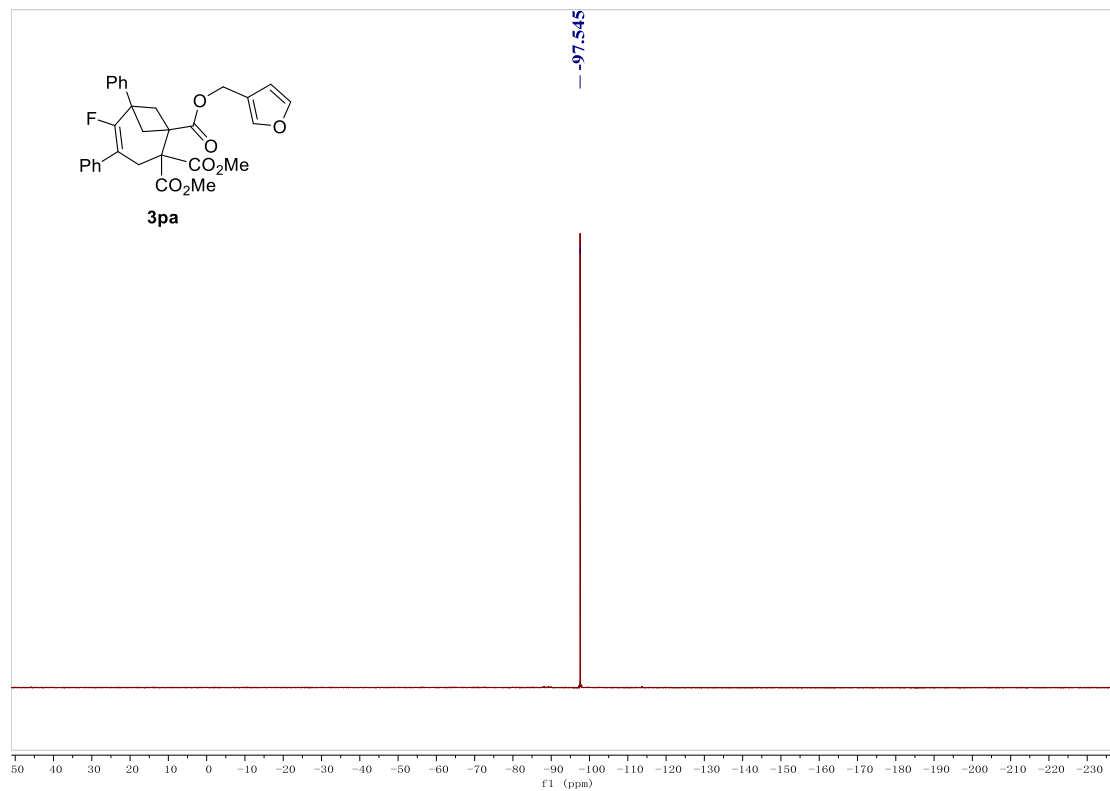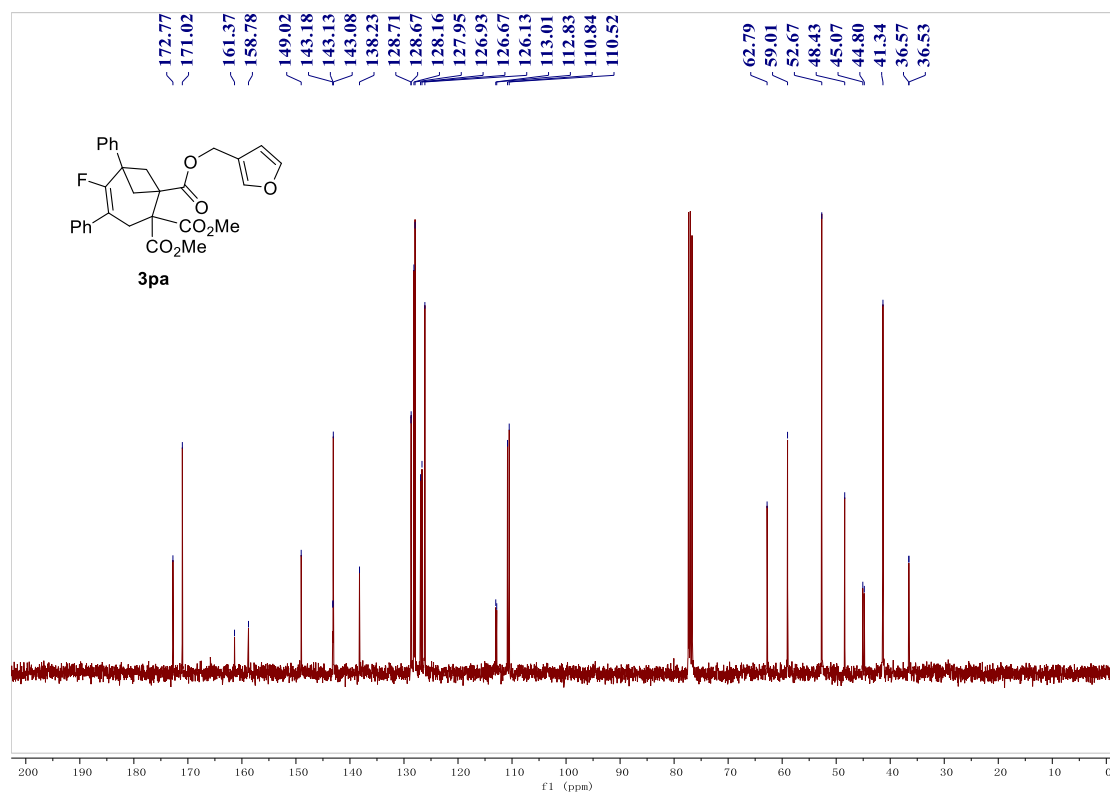

$^1\text{H}$  NMR (400MHz,  $\text{CDCl}_3$ ),  $^{19}\text{F}$  NMR (376 MHz,  $\text{CDCl}_3$ ) and  $^{13}\text{C}$  NMR (100 MHz,  $\text{CDCl}_3$ ) spectra of product **3qa**

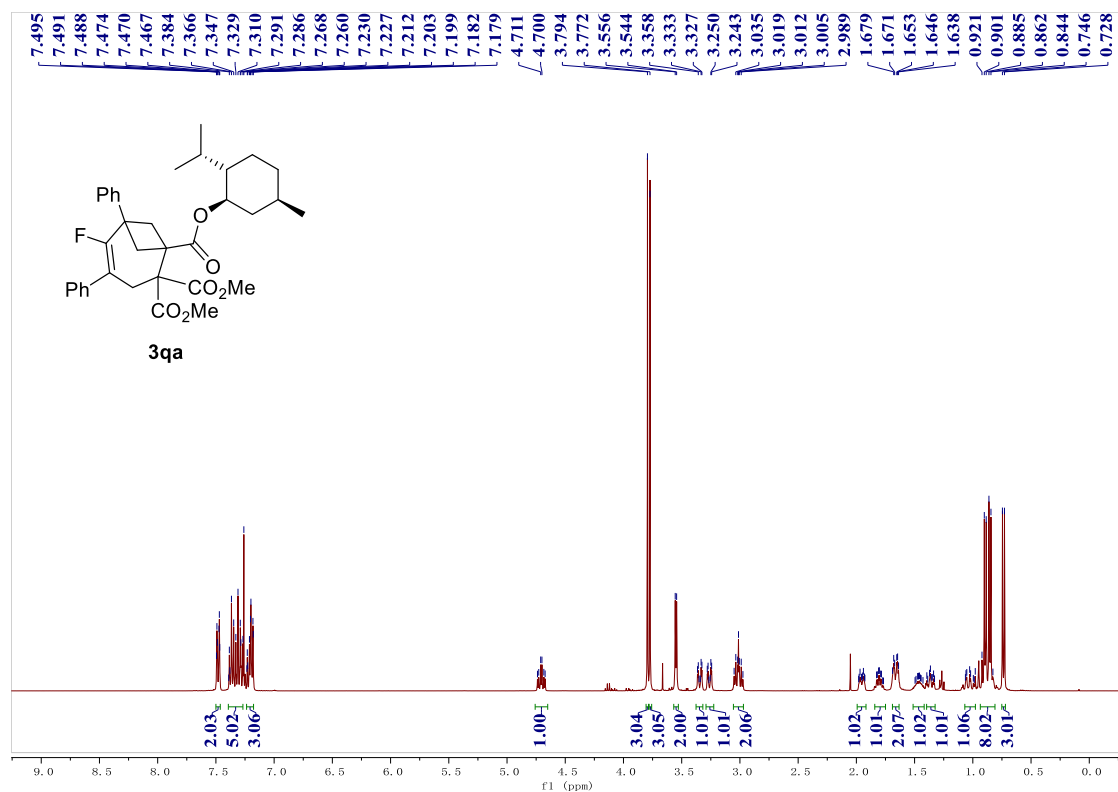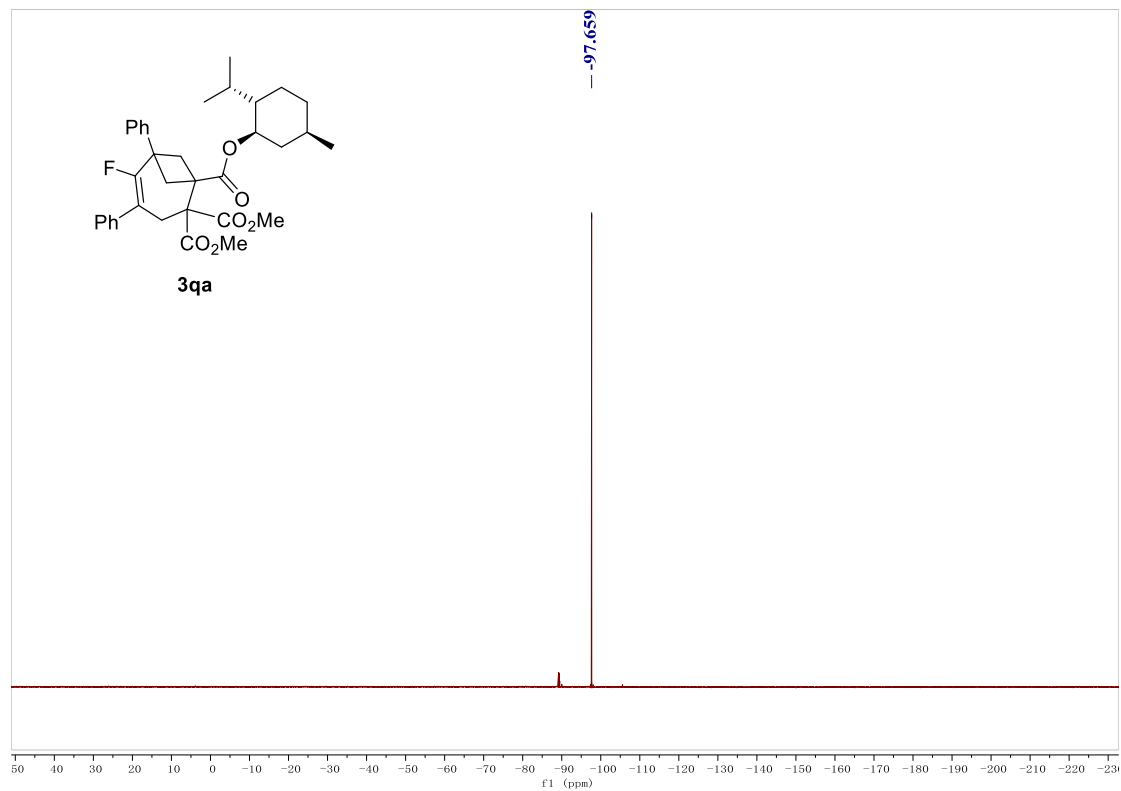

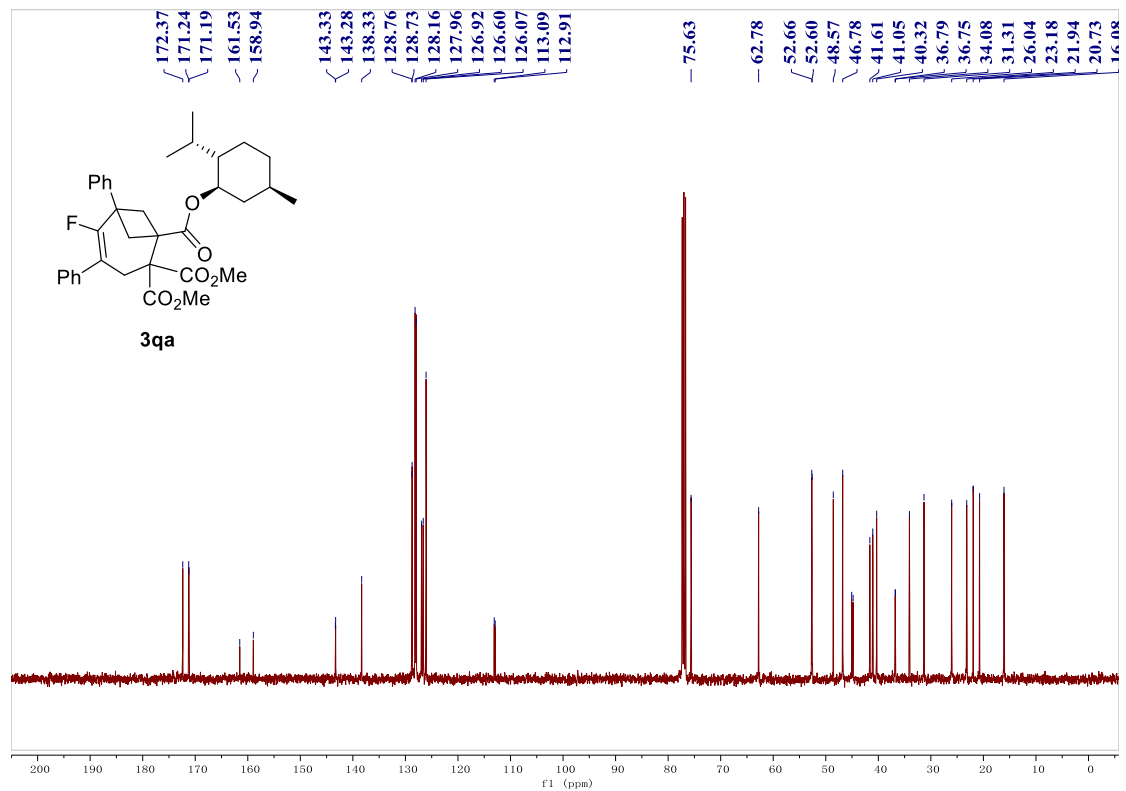

<sup>1</sup>H NMR (400MHz, CDCl<sub>3</sub>), <sup>19</sup>F NMR (376 MHz, CDCl<sub>3</sub>) and <sup>13</sup>C NMR (100 MHz, CDCl<sub>3</sub>) spectra of product **3ra**

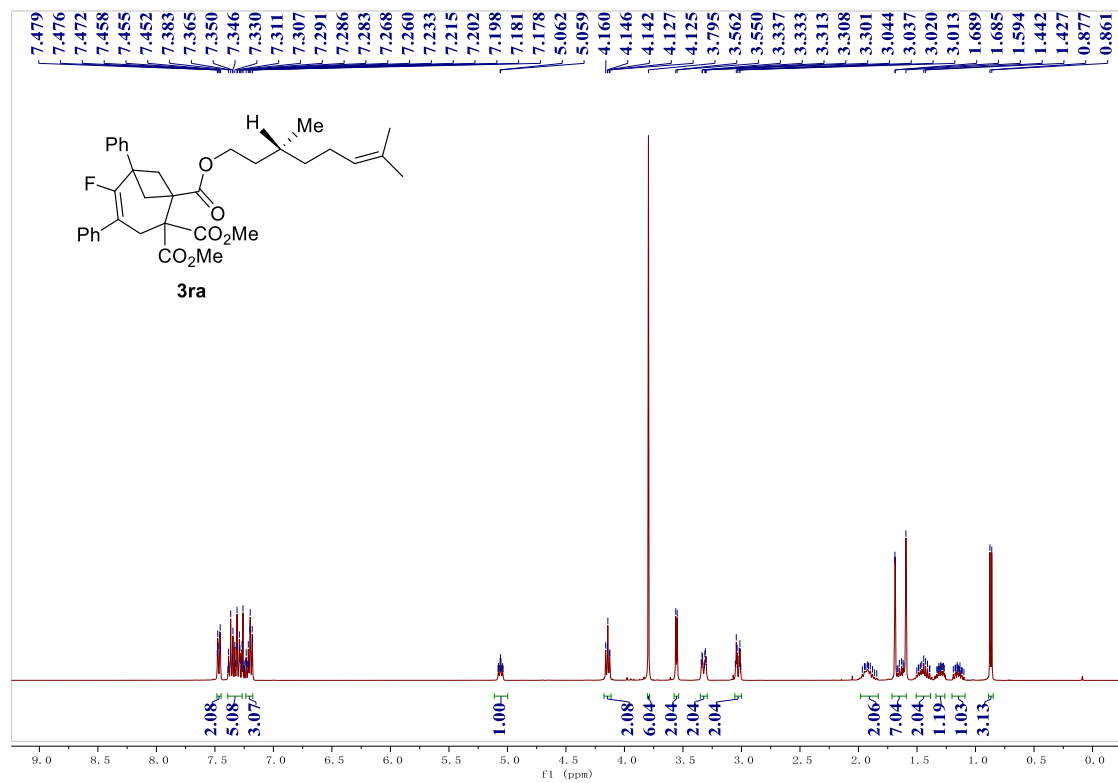



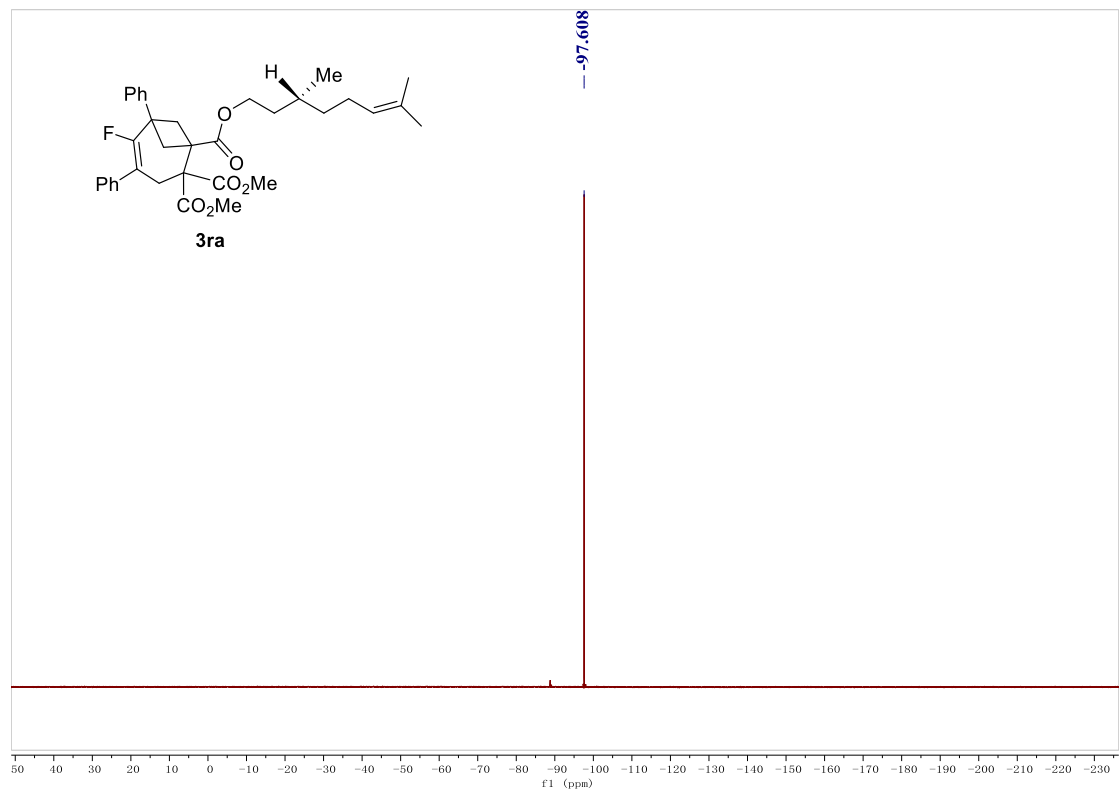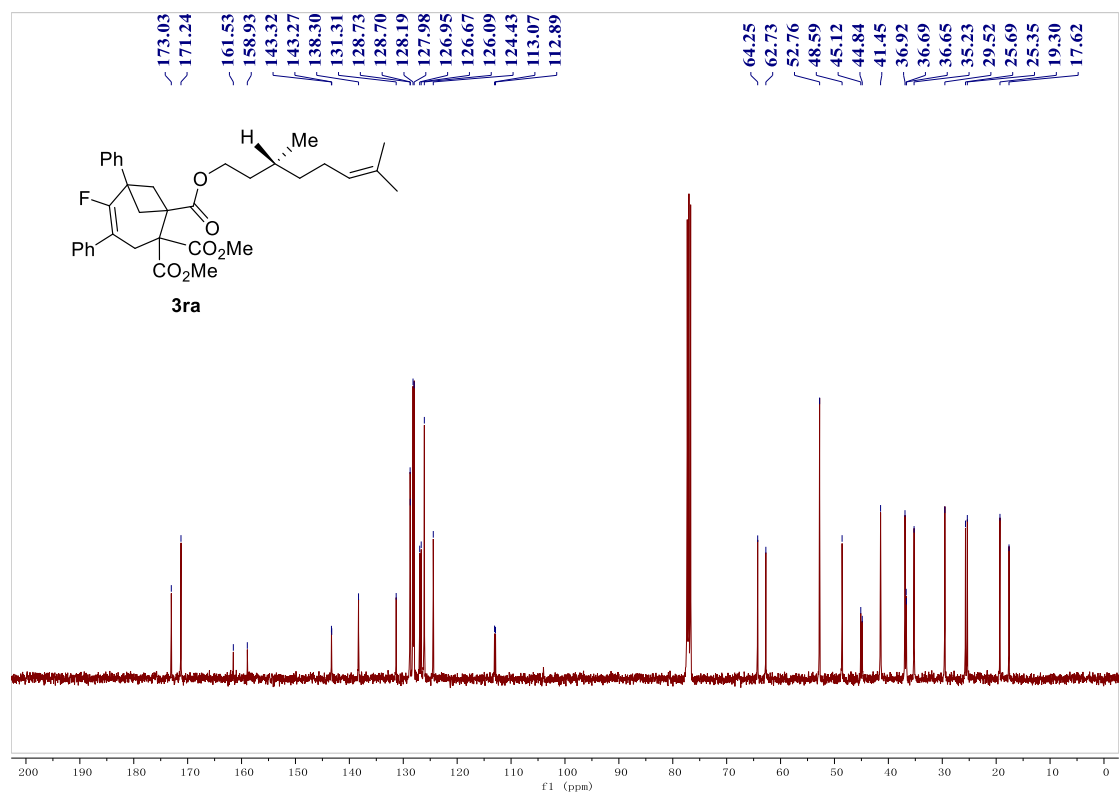

$^1\text{H}$  NMR (400MHz,  $\text{CDCl}_3$ ),  $^{19}\text{F}$  NMR (376 MHz,  $\text{CDCl}_3$ ) and  $^{13}\text{C}$  NMR (100 MHz,  $\text{CDCl}_3$ ) spectra of product **3sa**

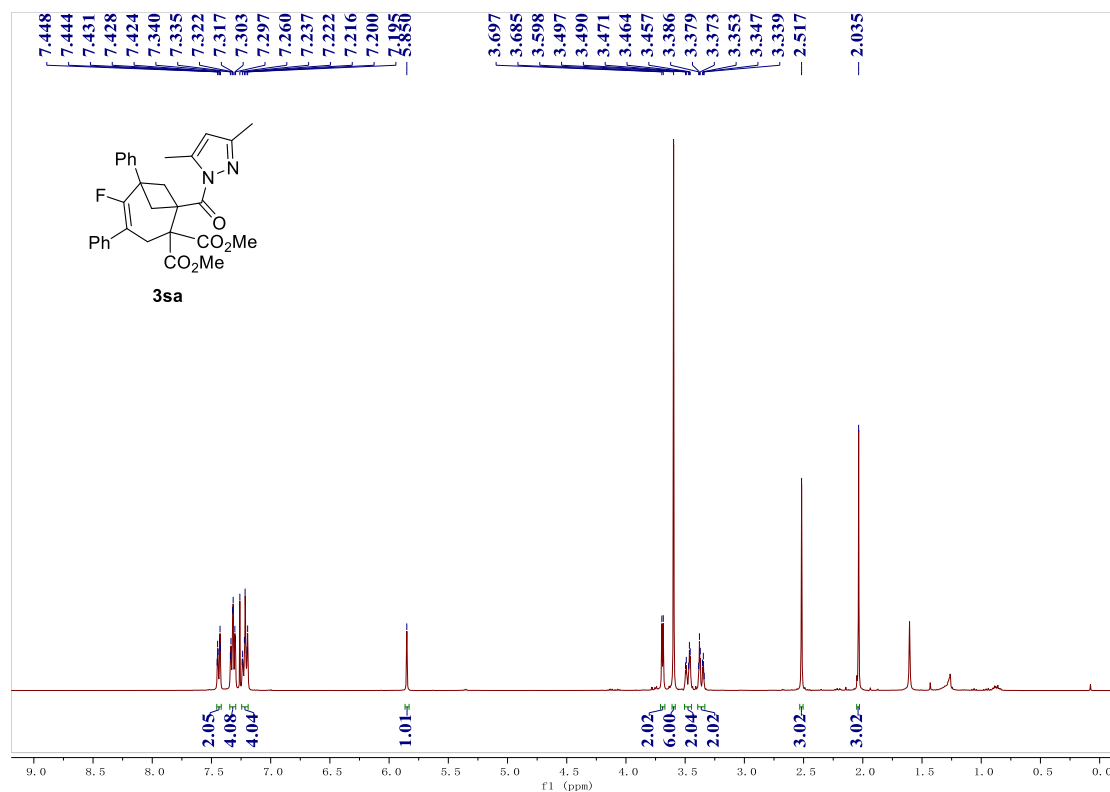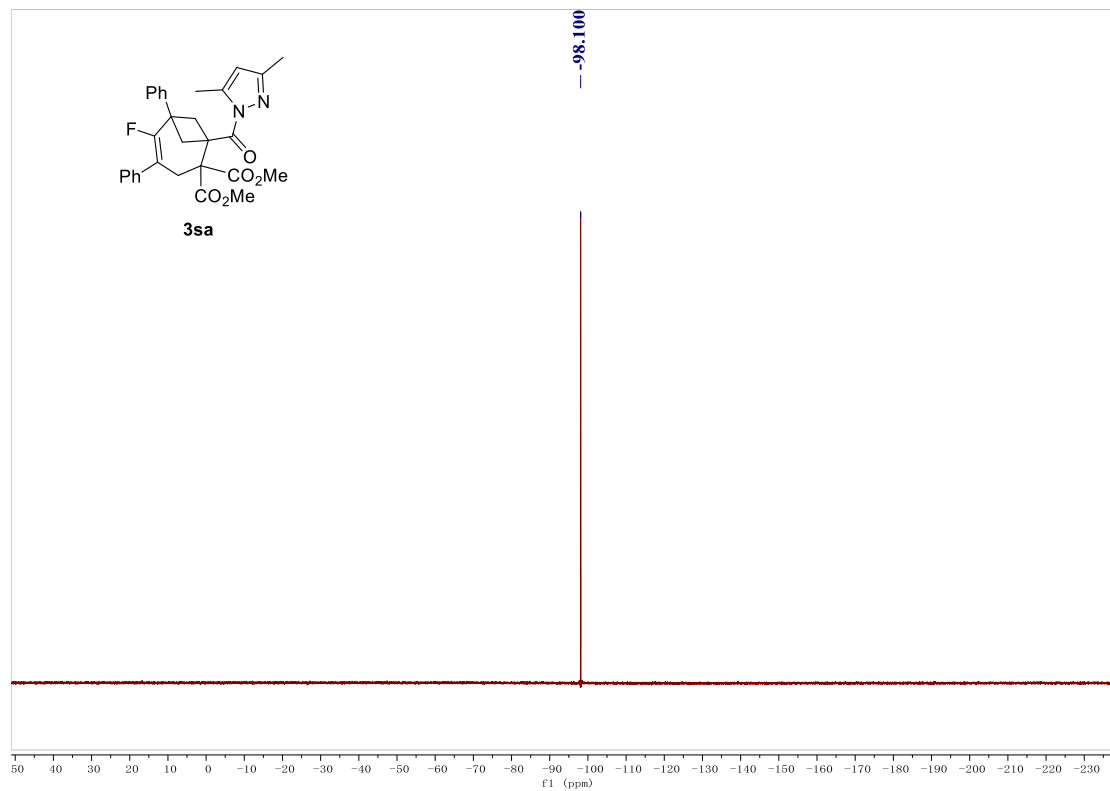

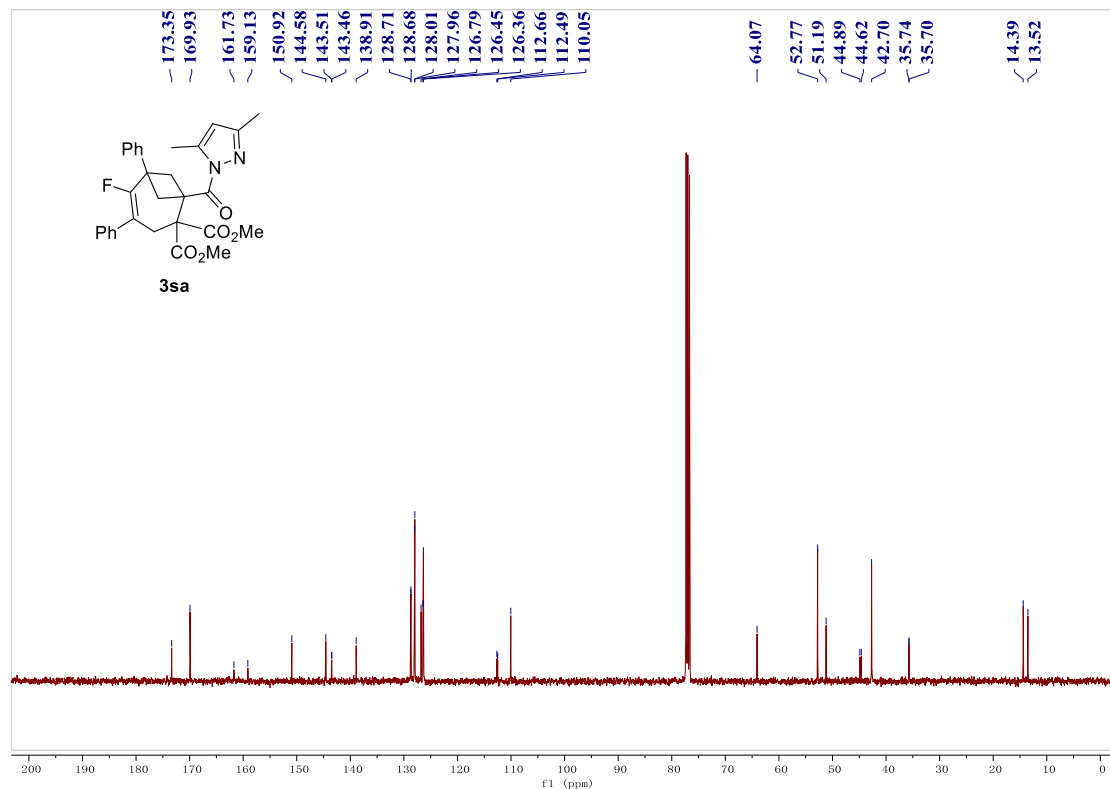

<sup>1</sup>H NMR (400MHz, CDCl<sub>3</sub>), <sup>19</sup>F NMR (376 MHz, CDCl<sub>3</sub>) and <sup>13</sup>C NMR (100 MHz, CDCl<sub>3</sub>) spectra of product **3ab**

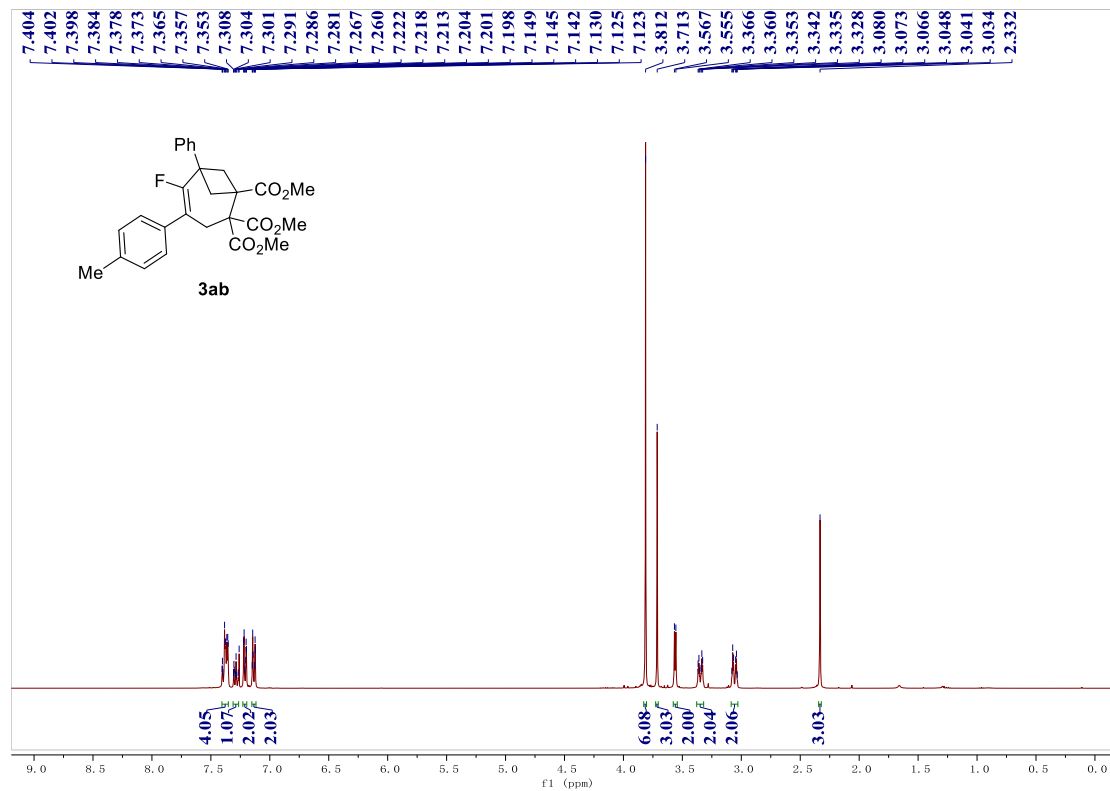

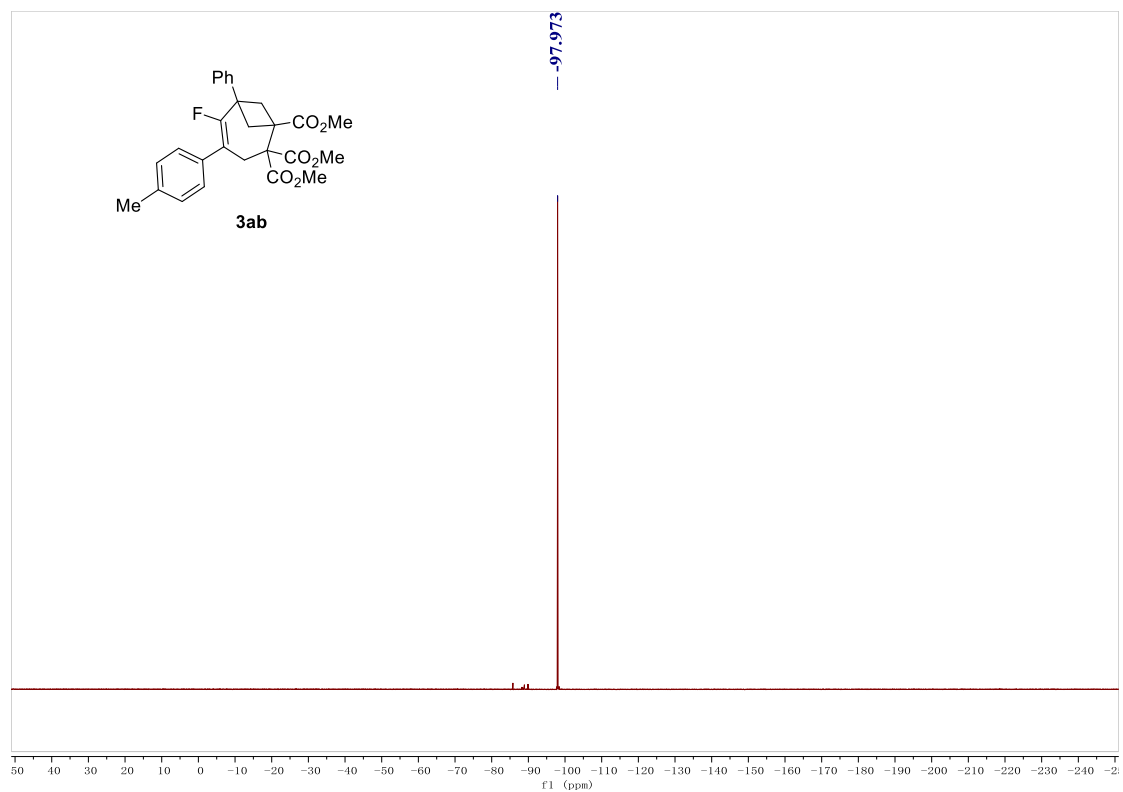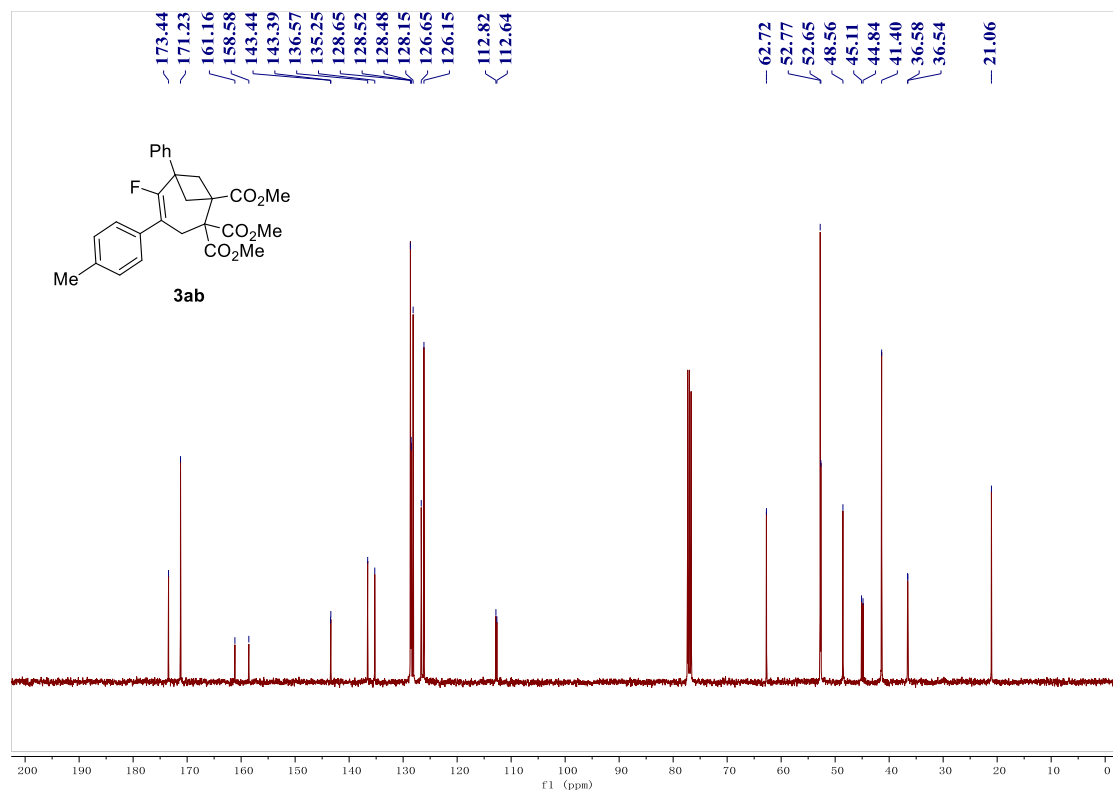

$^1\text{H}$  NMR (400MHz,  $\text{CDCl}_3$ ),  $^{19}\text{F}$  NMR (376 MHz,  $\text{CDCl}_3$ ) and  $^{13}\text{C}$  NMR (100 MHz,  $\text{CDCl}_3$ ) spectra of product **3ac**

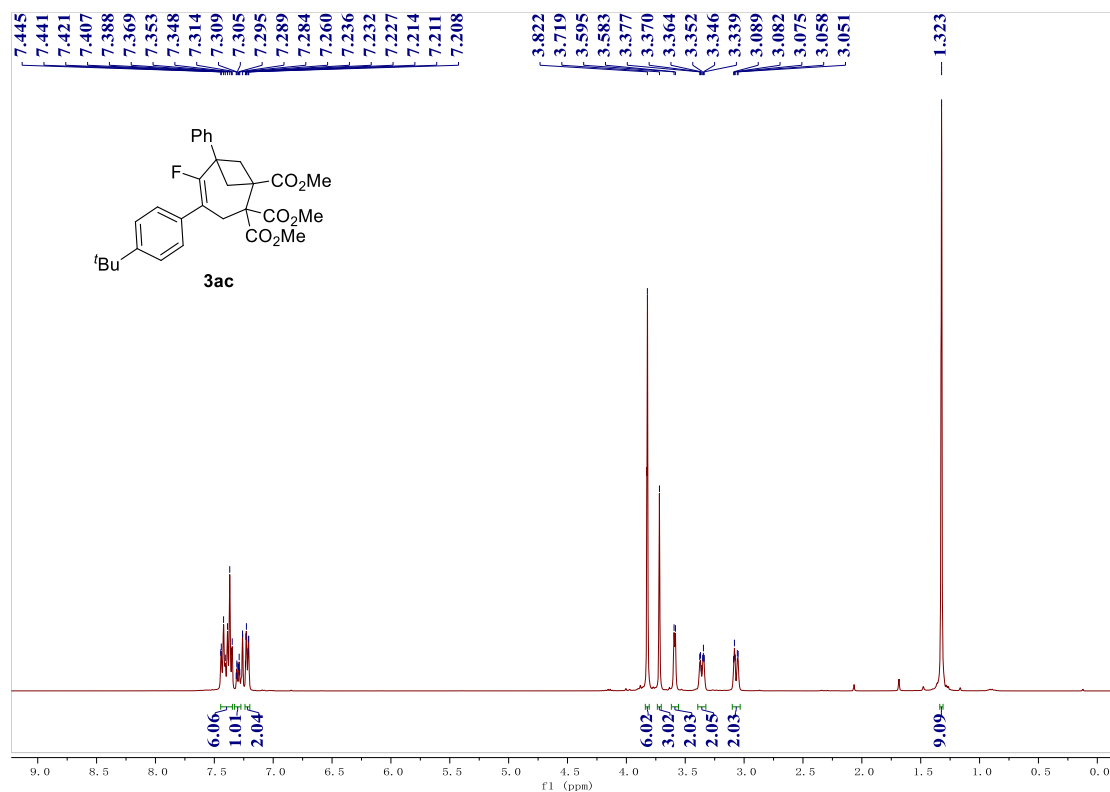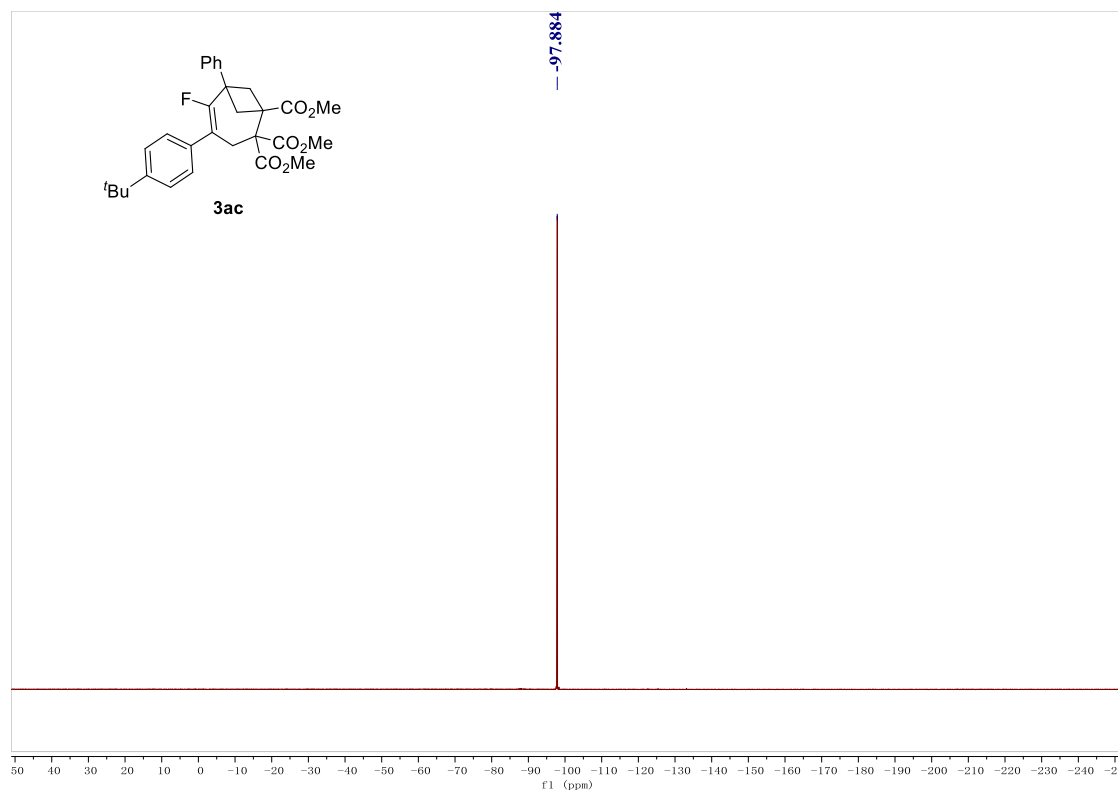

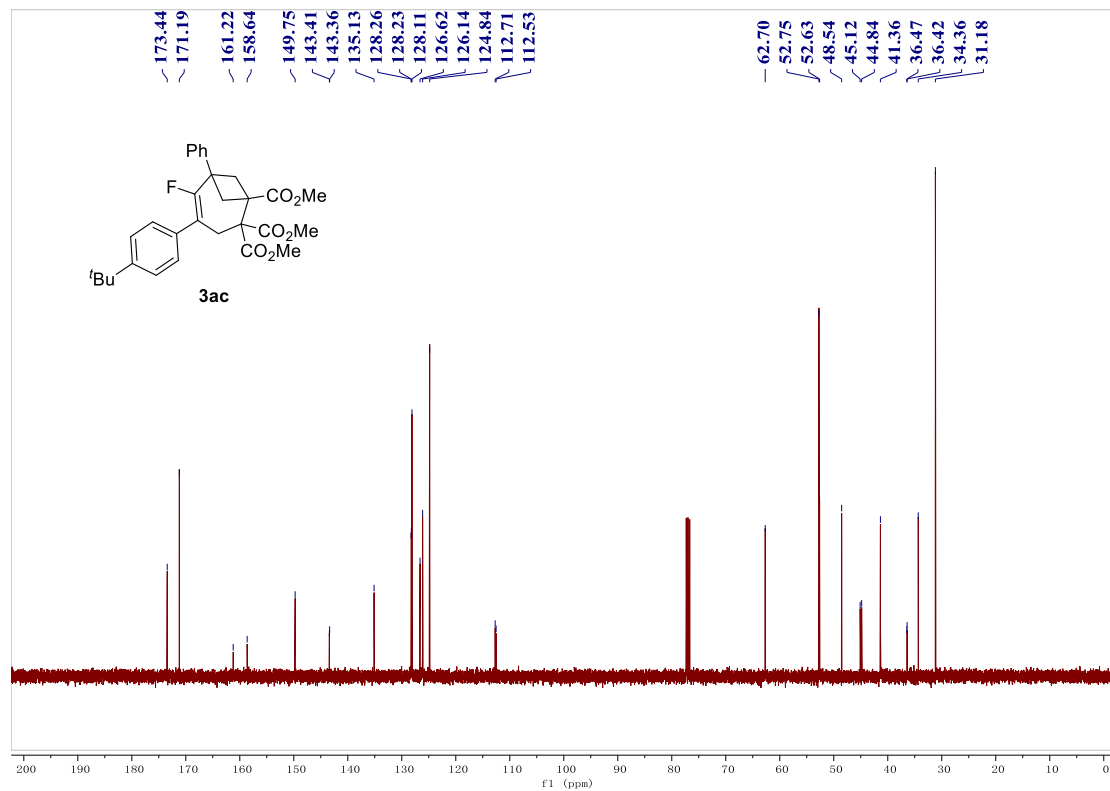

$^1\text{H}$  NMR (400MHz,  $\text{CDCl}_3$ ),  $^{19}\text{F}$  NMR (376 MHz,  $\text{CDCl}_3$ ) and  $^{13}\text{C}$  NMR (100 MHz,  $\text{CDCl}_3$ ) spectra of product **3ad**

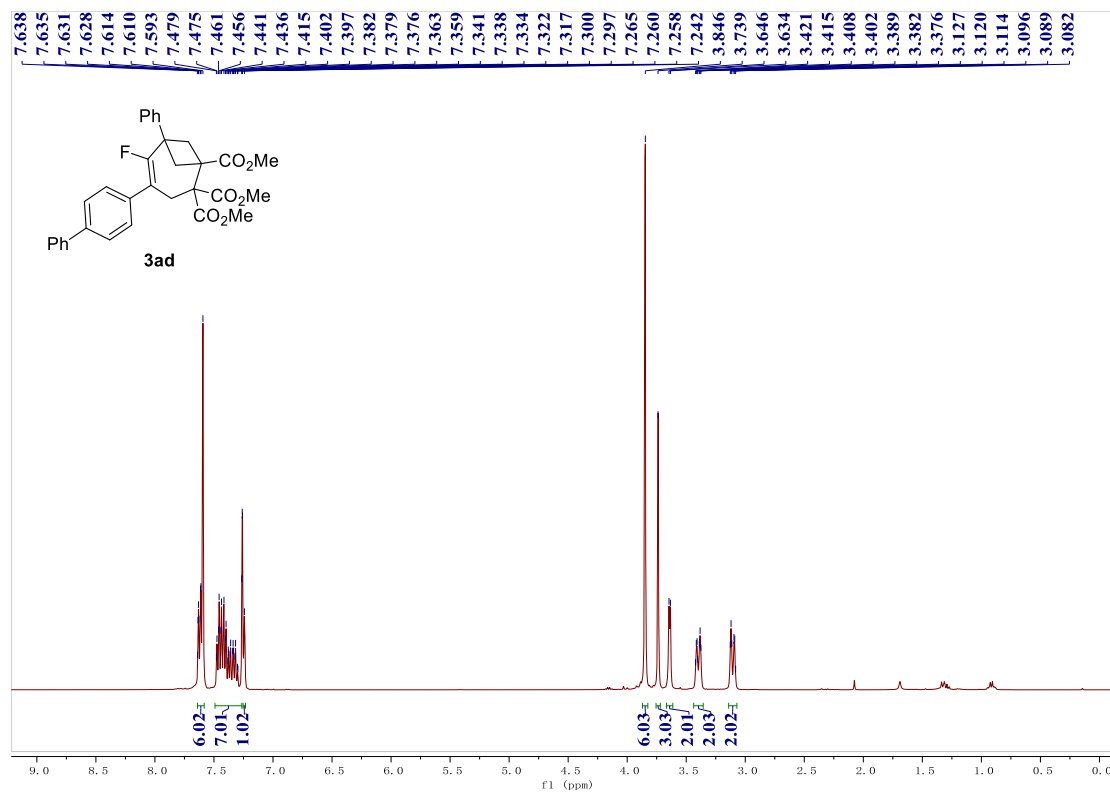

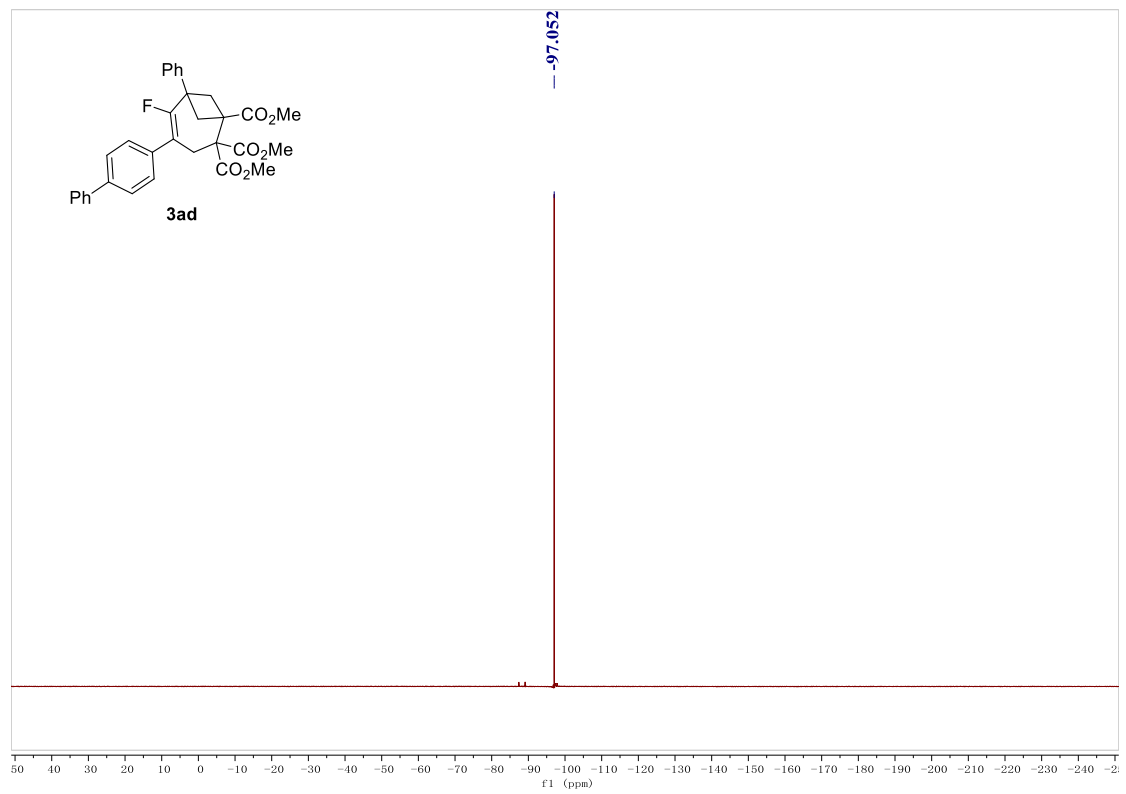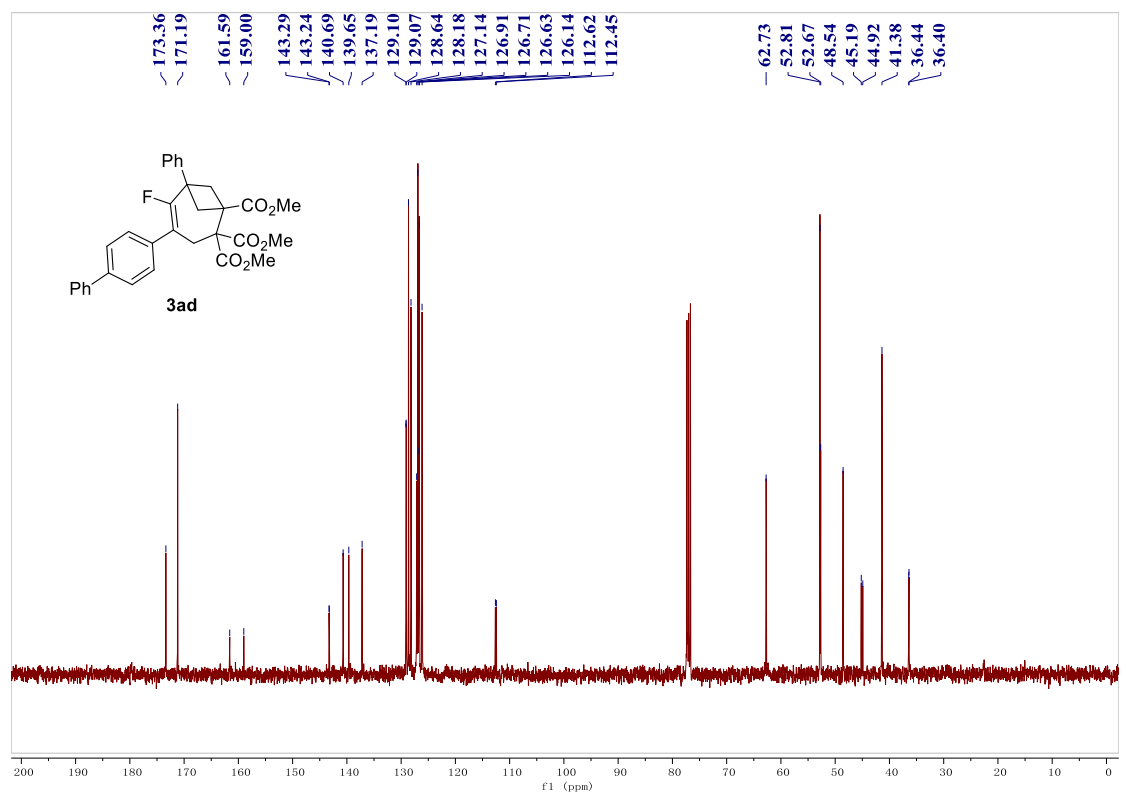

$^1\text{H}$  NMR (400MHz,  $\text{CDCl}_3$ ),  $^{19}\text{F}$  NMR (376 MHz,  $\text{CDCl}_3$ ) and  $^{13}\text{C}$  NMR (100 MHz,  $\text{CDCl}_3$ ) spectra of product **3ae**

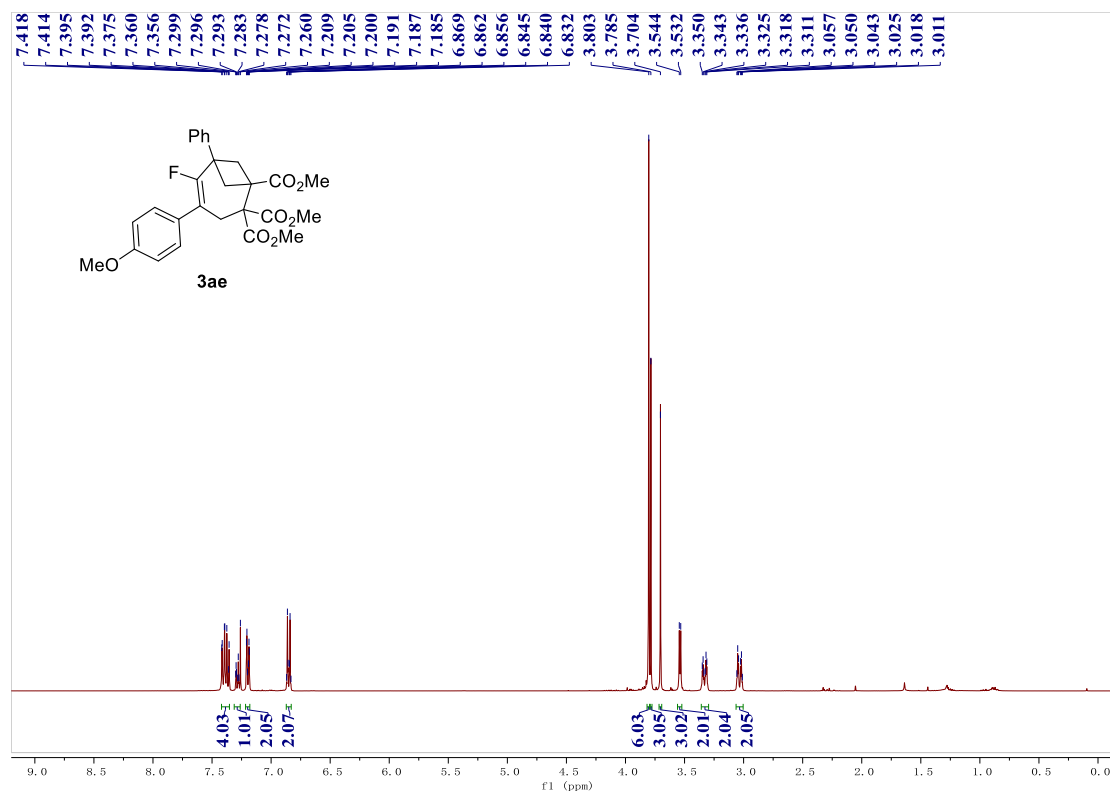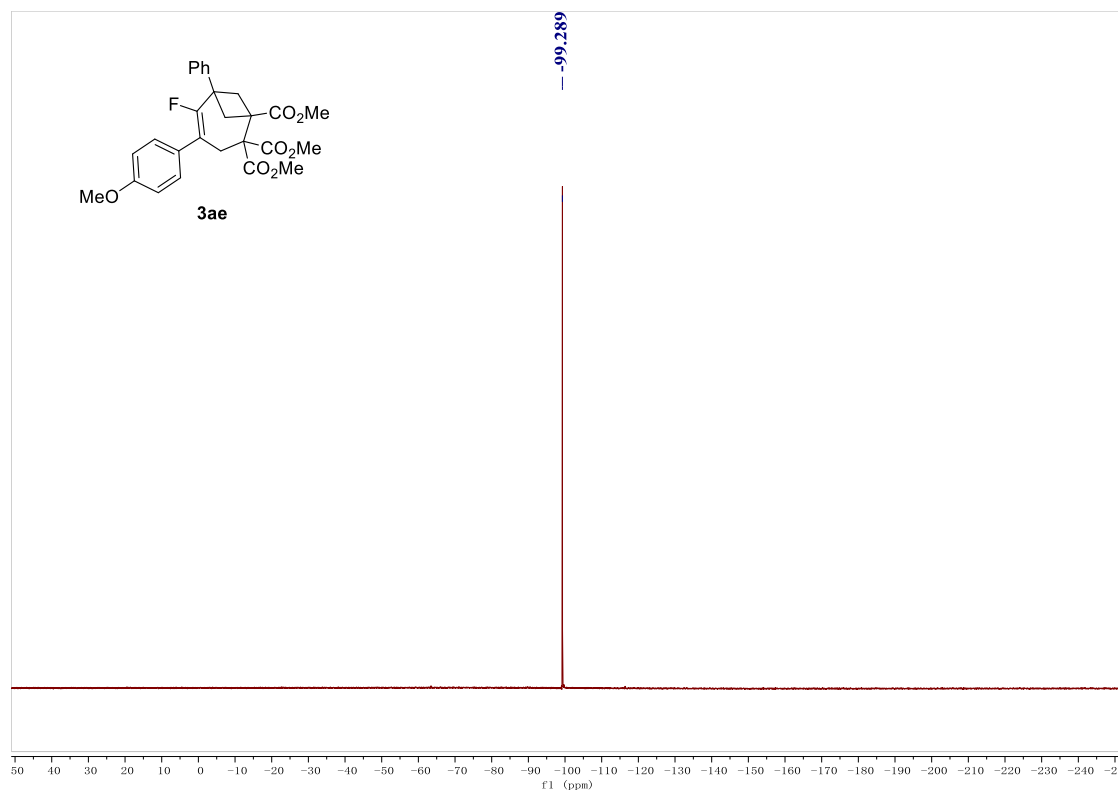



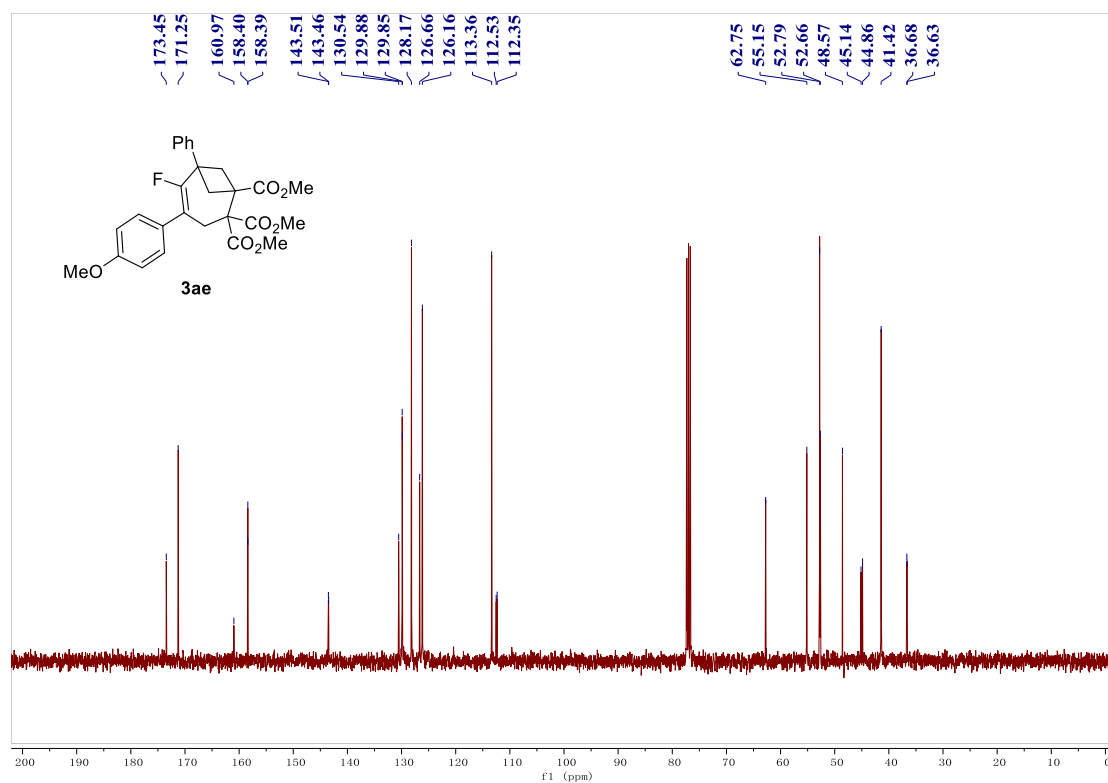

<sup>1</sup>H NMR (400MHz, CDCl<sub>3</sub>), <sup>19</sup>F NMR (376 MHz, CDCl<sub>3</sub>) and <sup>13</sup>C NMR (100 MHz, CDCl<sub>3</sub>) spectra of product **3af**

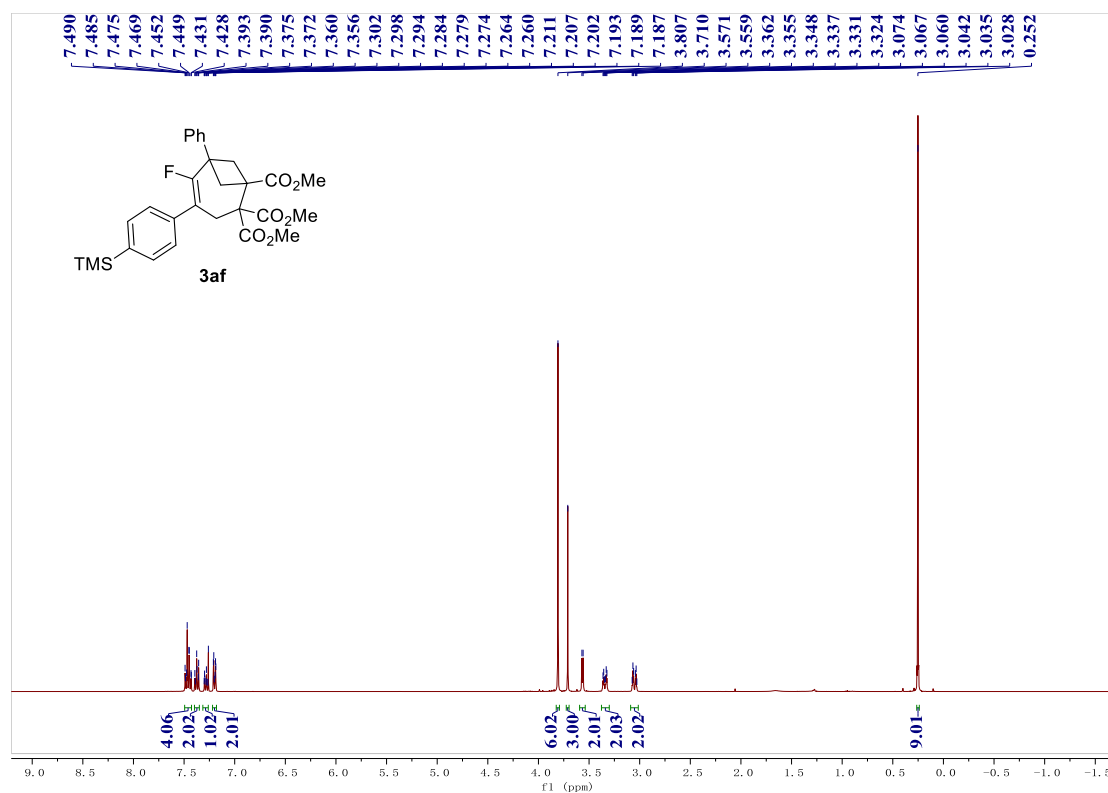

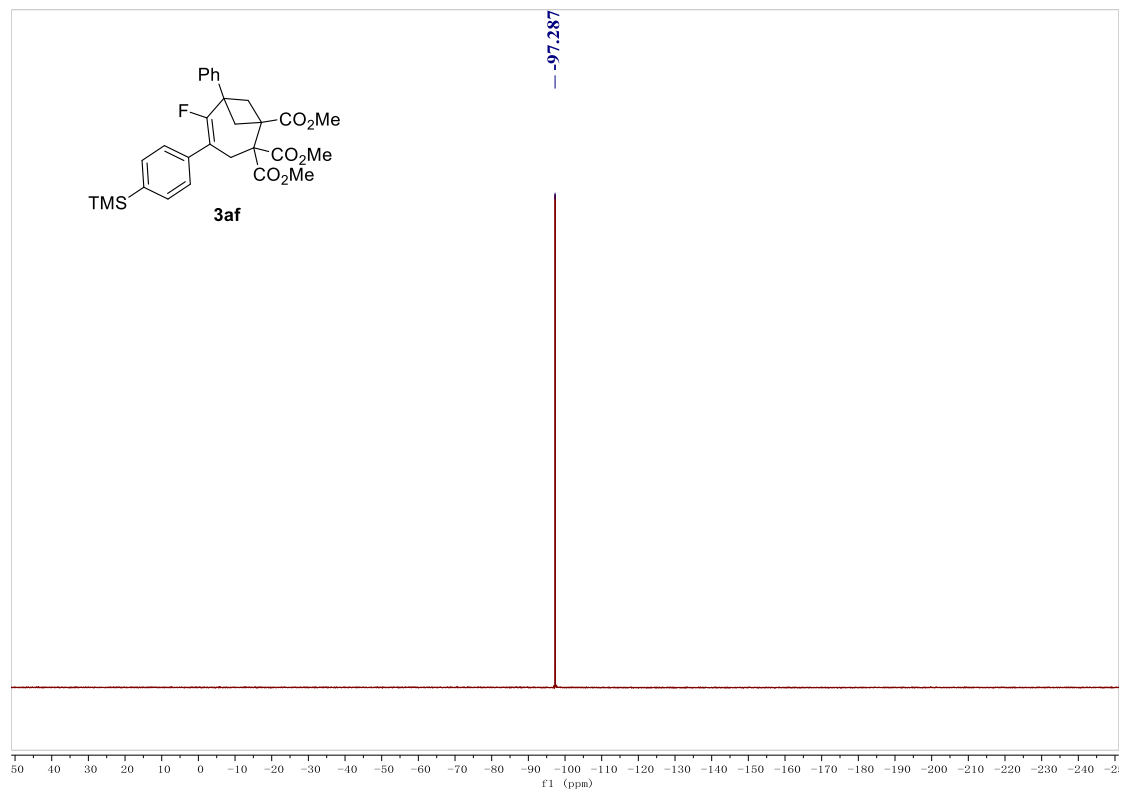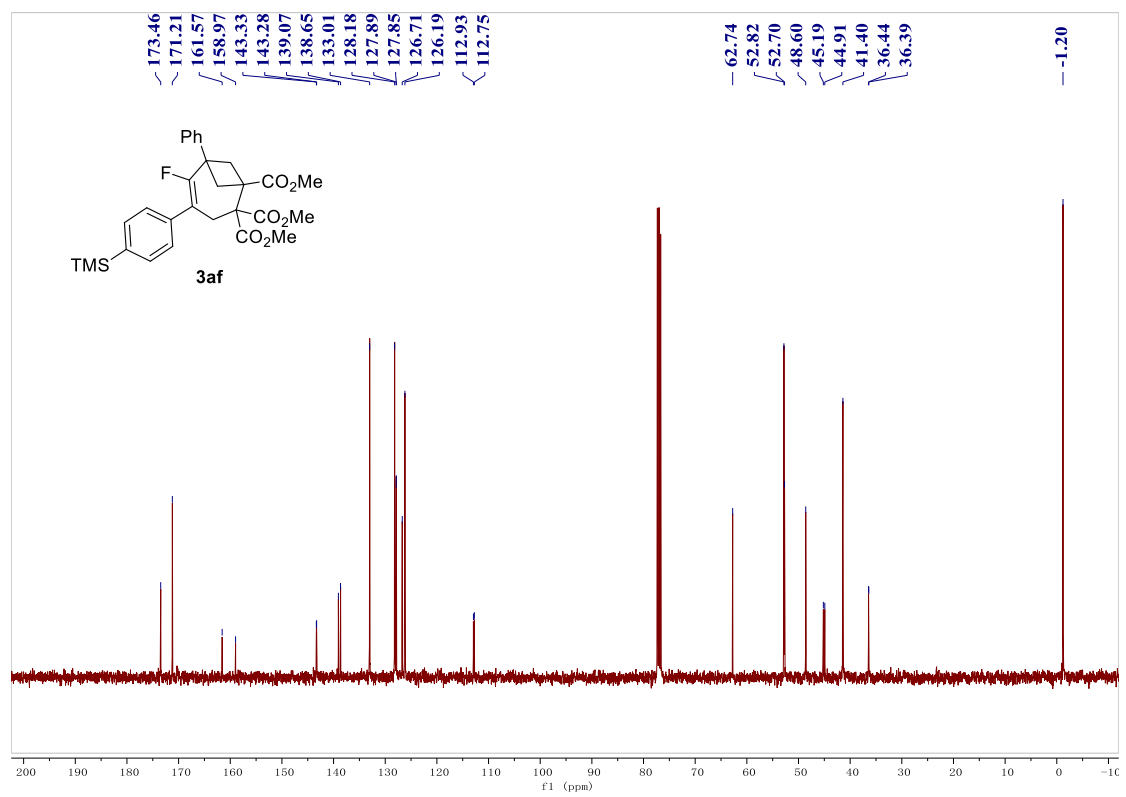

$^1\text{H}$  NMR (400MHz,  $\text{CDCl}_3$ ),  $^{19}\text{F}$  NMR (376 MHz,  $\text{CDCl}_3$ ) and  $^{13}\text{C}$  NMR (100 MHz,  $\text{CDCl}_3$ ) spectra of product **3ag**

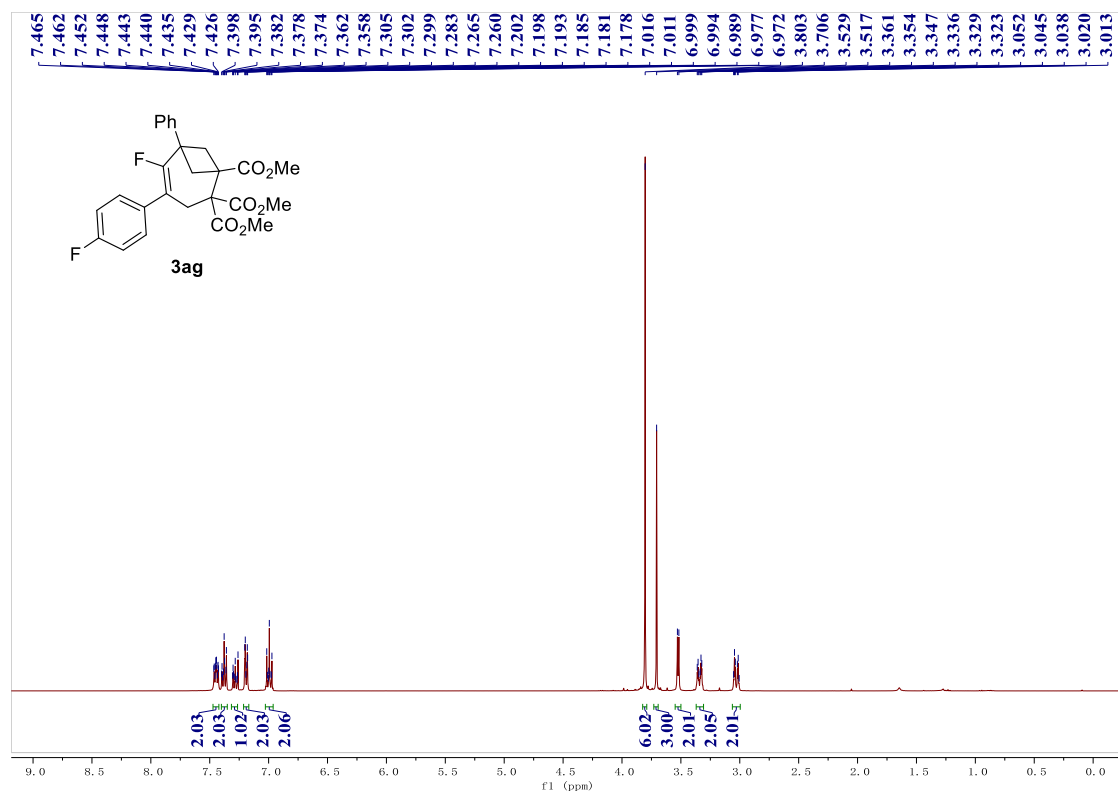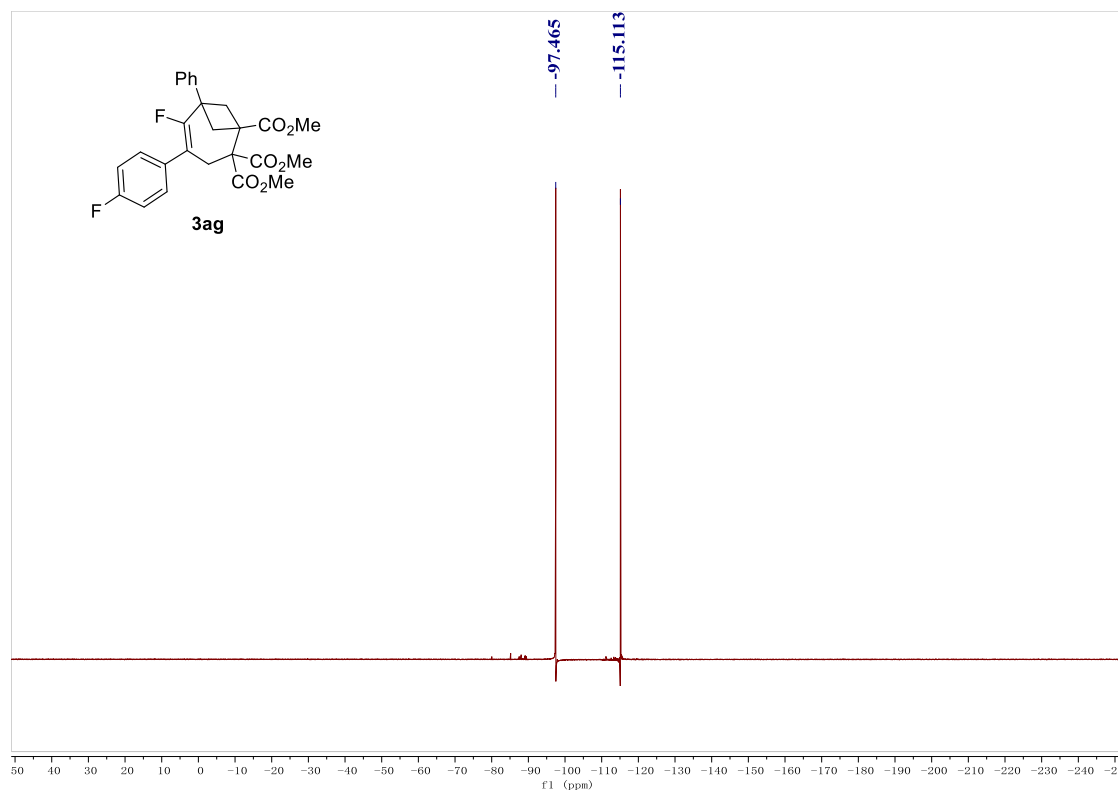

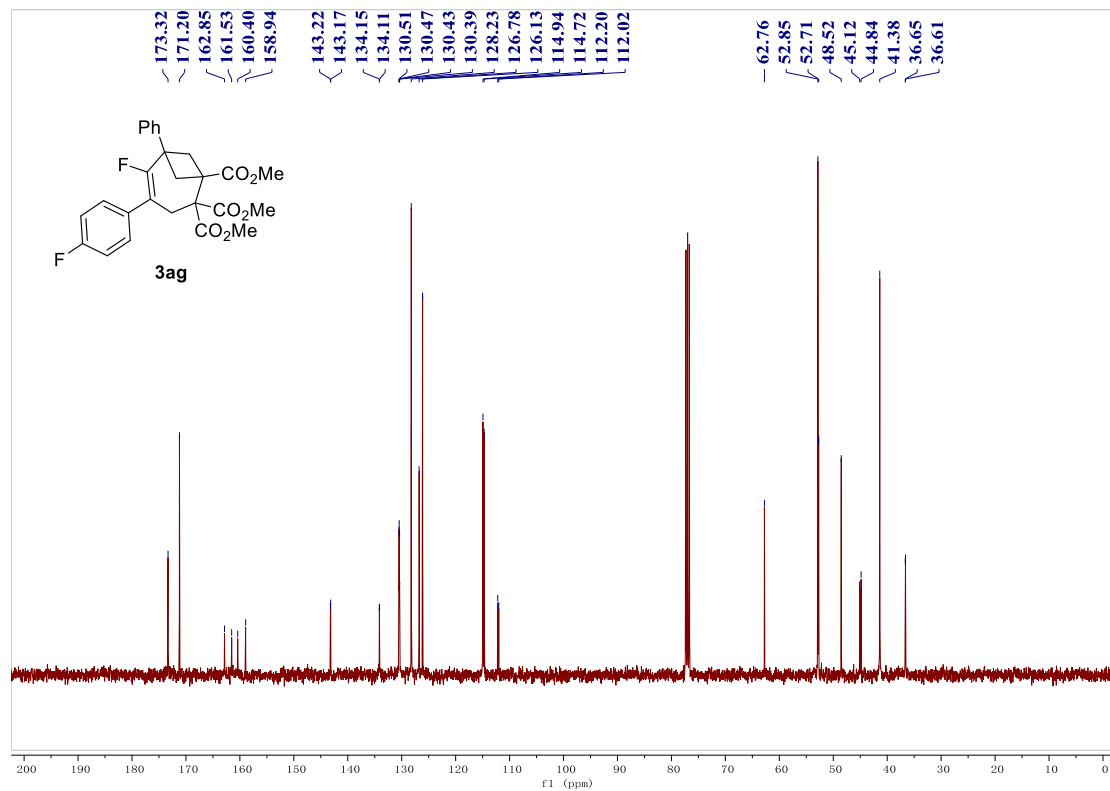

$^1\text{H}$  NMR (400MHz,  $\text{CDCl}_3$ ),  $^{19}\text{F}$  NMR (376 MHz,  $\text{CDCl}_3$ ) and  $^{13}\text{C}$  NMR (100 MHz,  $\text{CDCl}_3$ ) spectra of product **3ah**

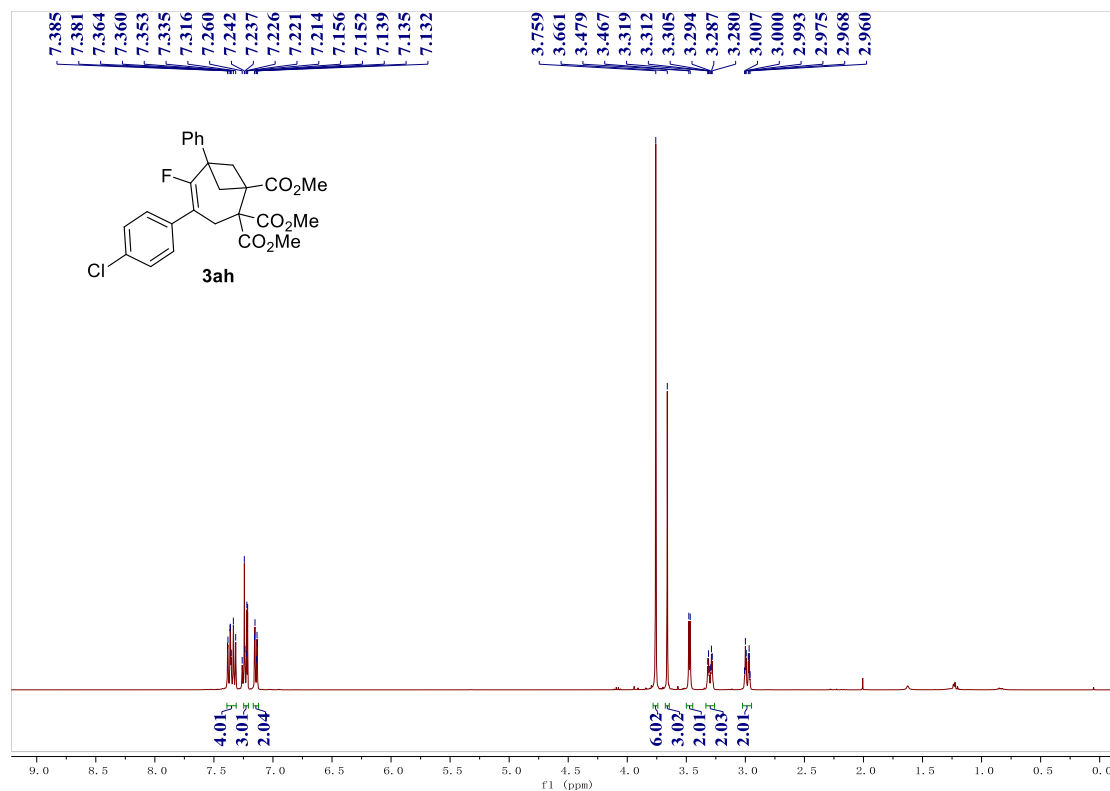

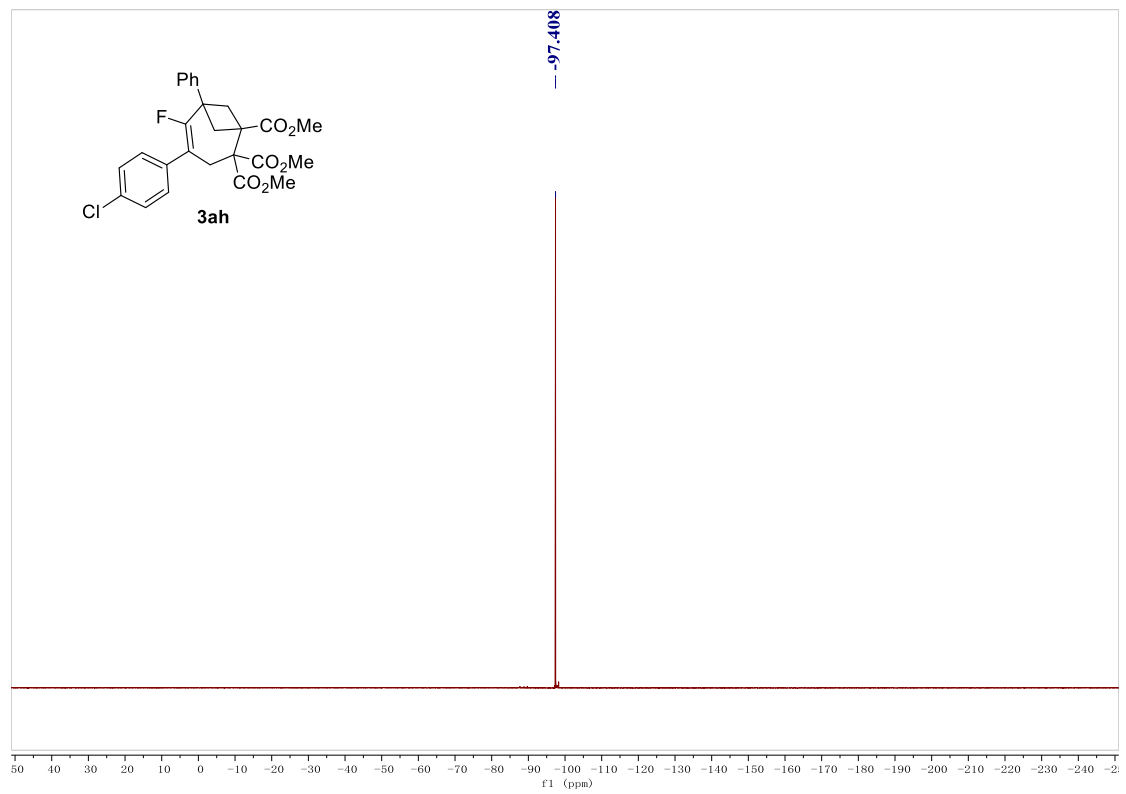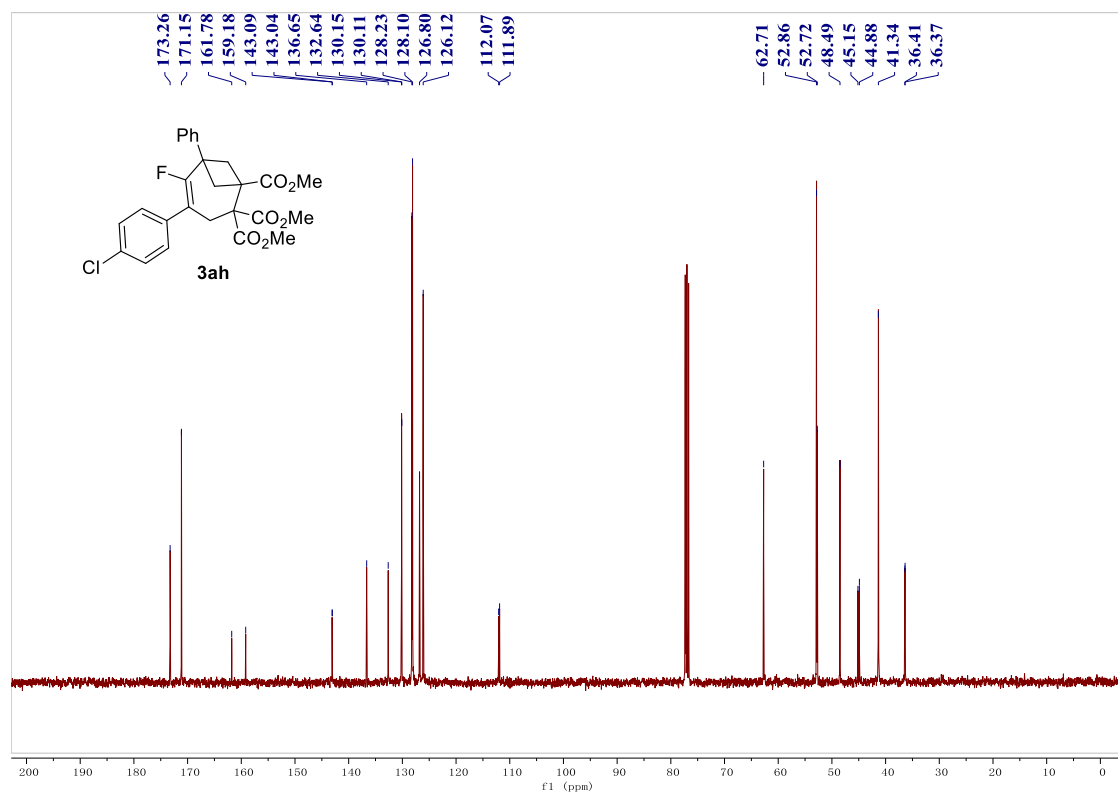

$^1\text{H}$  NMR (400MHz,  $\text{CDCl}_3$ ),  $^{19}\text{F}$  NMR (376 MHz,  $\text{CDCl}_3$ ) and  $^{13}\text{C}$  NMR (100 MHz,  $\text{CDCl}_3$ ) spectra of product **3ai**

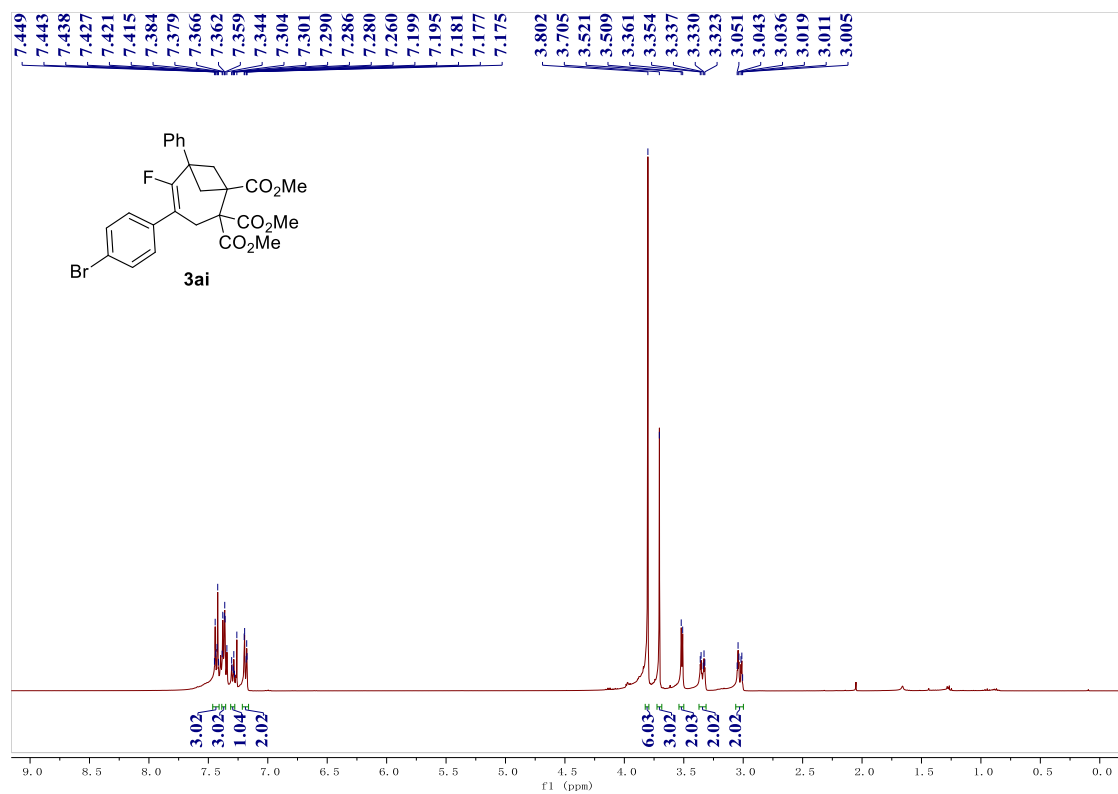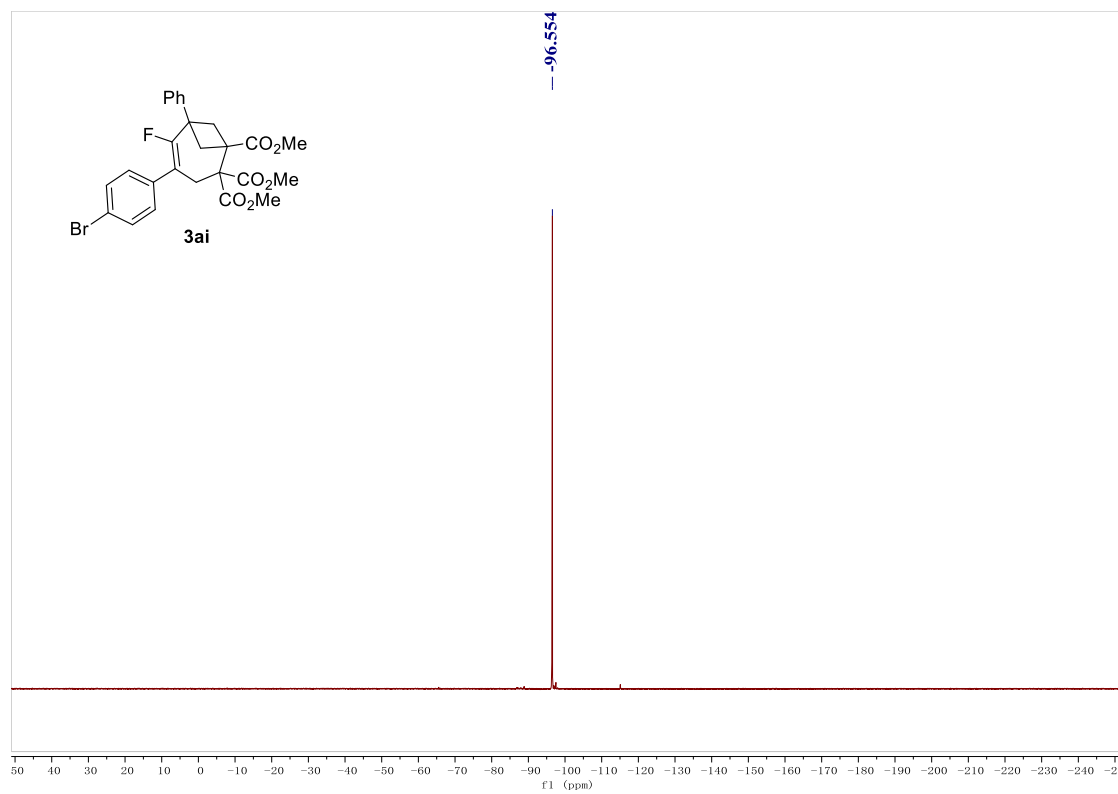

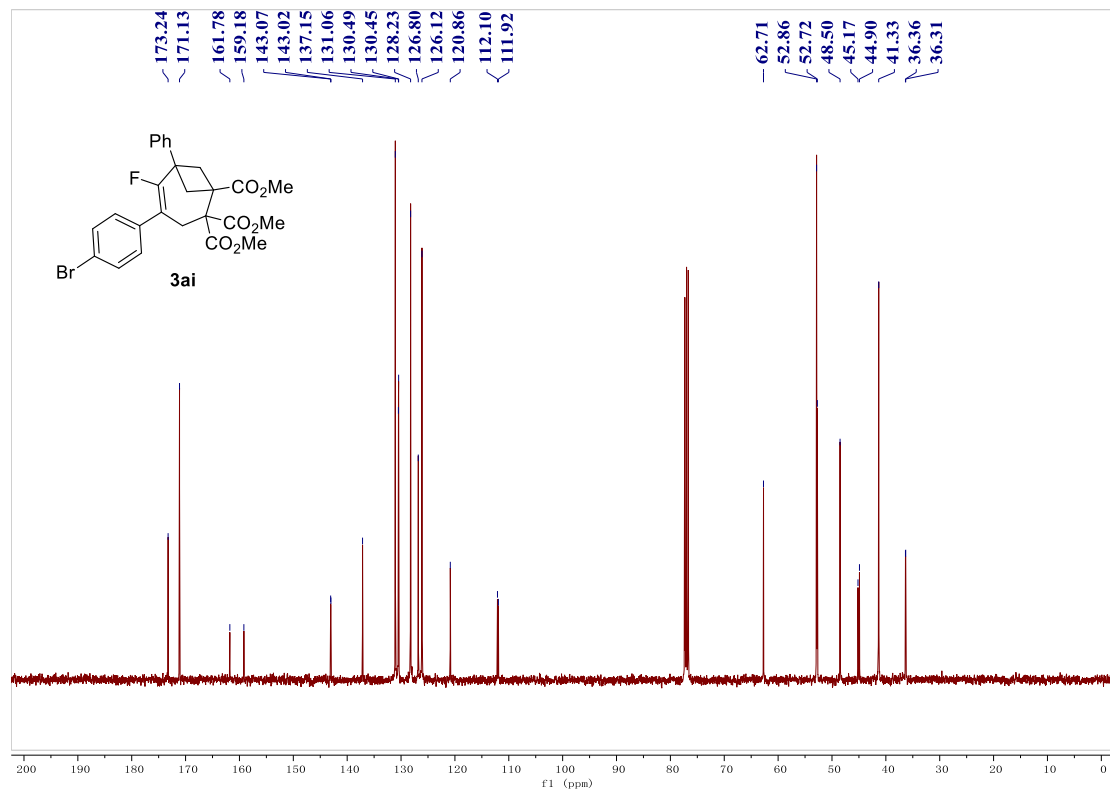

<sup>1</sup>H NMR (400MHz, CDCl<sub>3</sub>), <sup>19</sup>F NMR (376 MHz, CDCl<sub>3</sub>) and <sup>13</sup>C NMR (100 MHz, CDCl<sub>3</sub>) spectra of product **3aj**

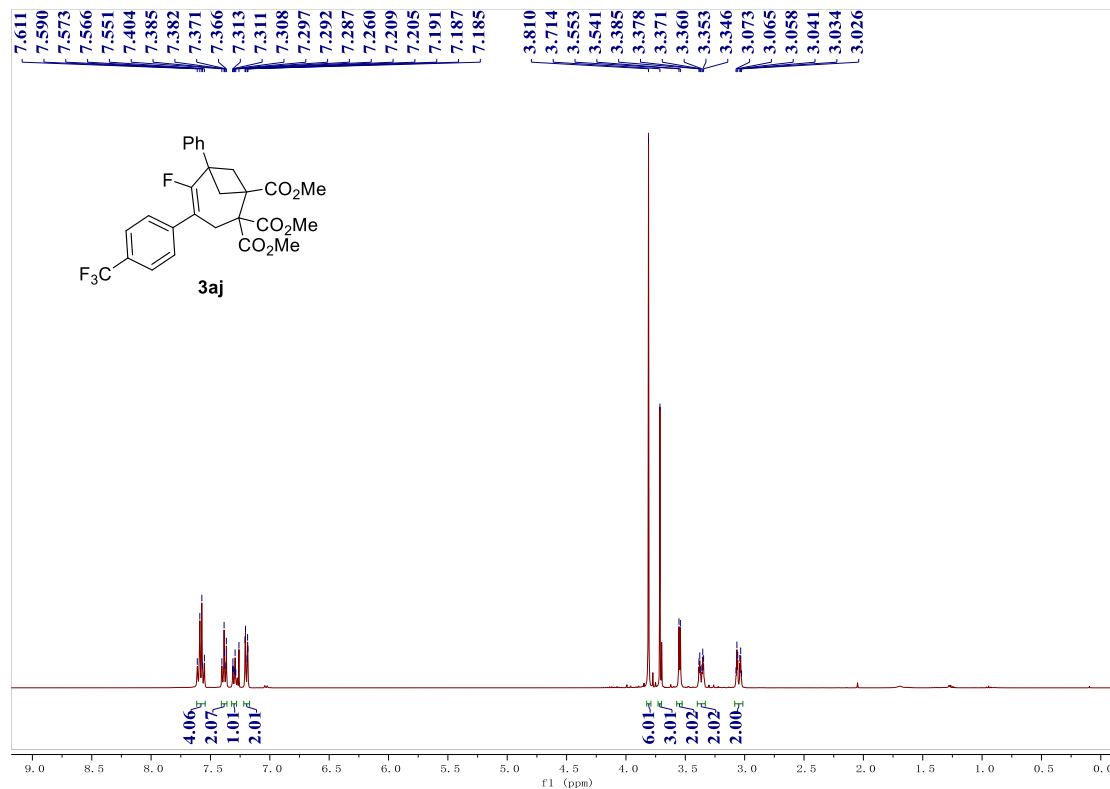

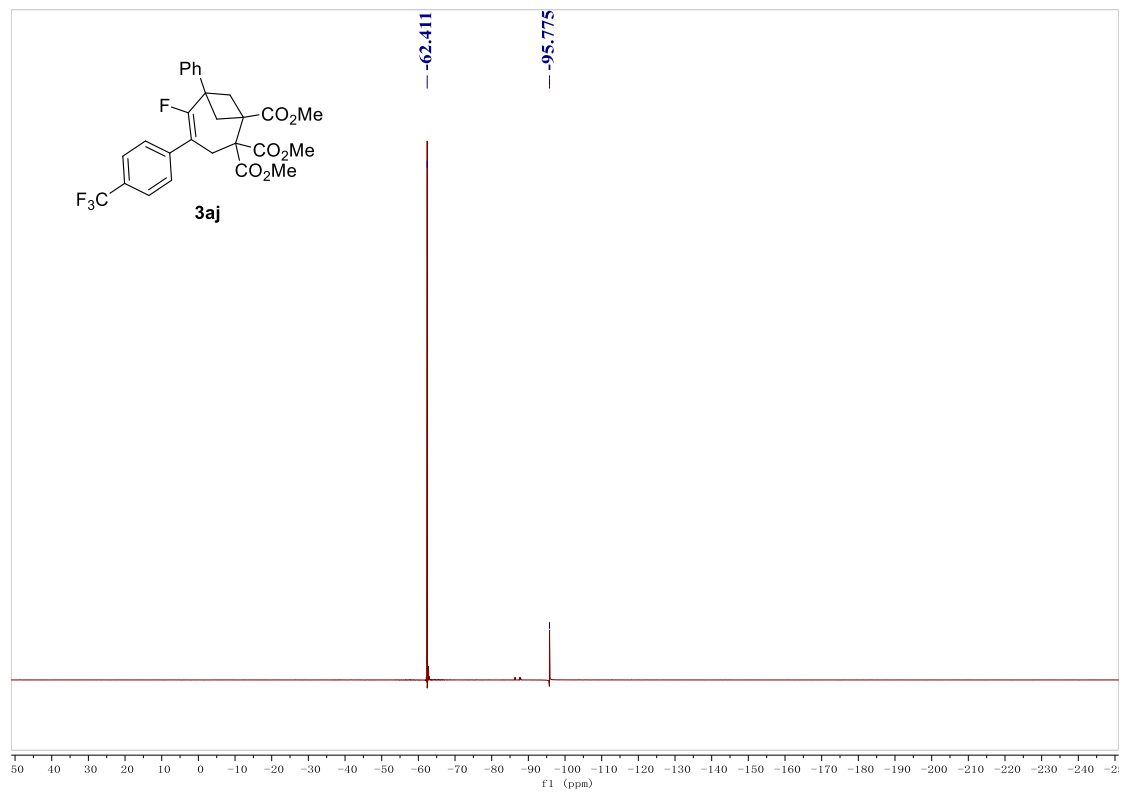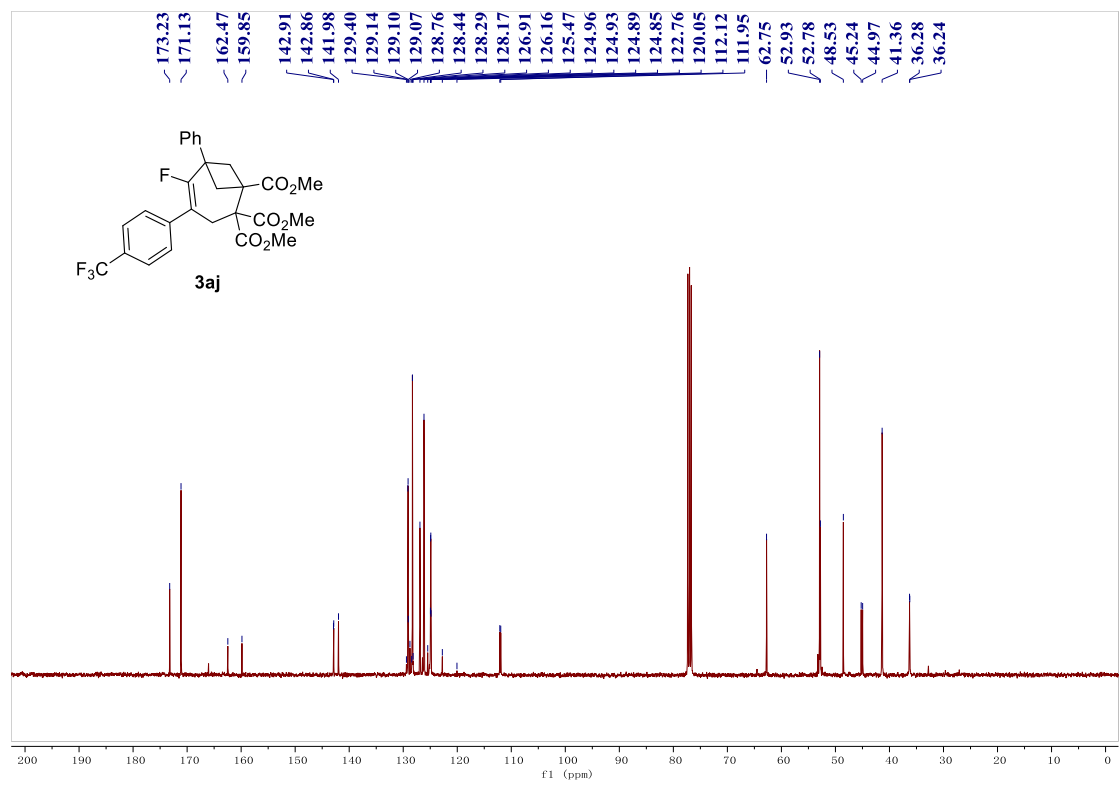



$^1\text{H}$  NMR (400MHz,  $\text{CDCl}_3$ ),  $^{19}\text{F}$  NMR (376 MHz,  $\text{CDCl}_3$ ) and  $^{13}\text{C}$  NMR (100 MHz,  $\text{CDCl}_3$ ) spectra of product **3ak**

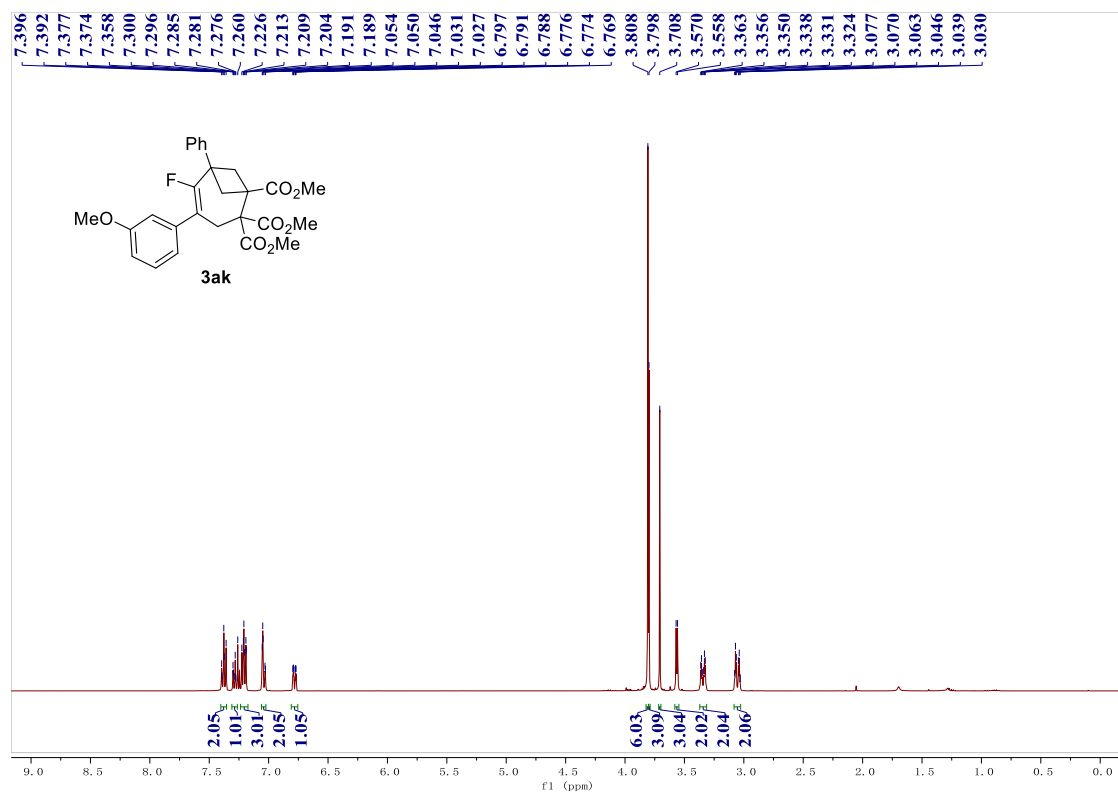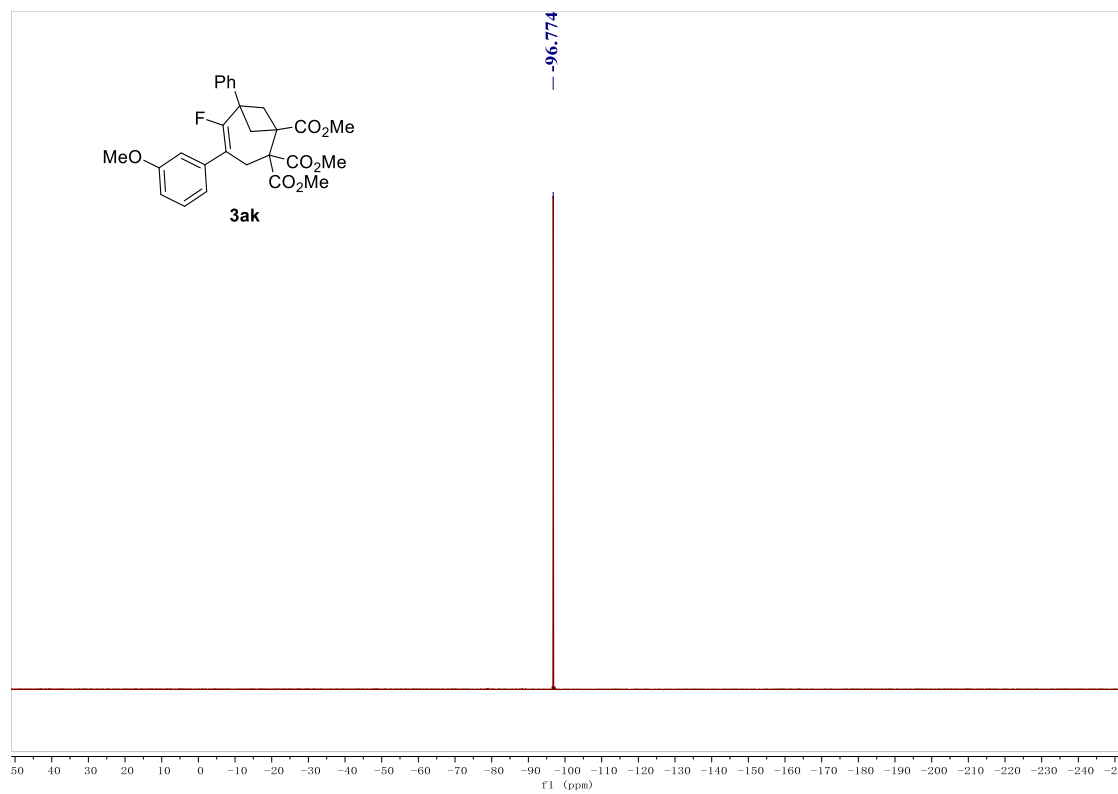

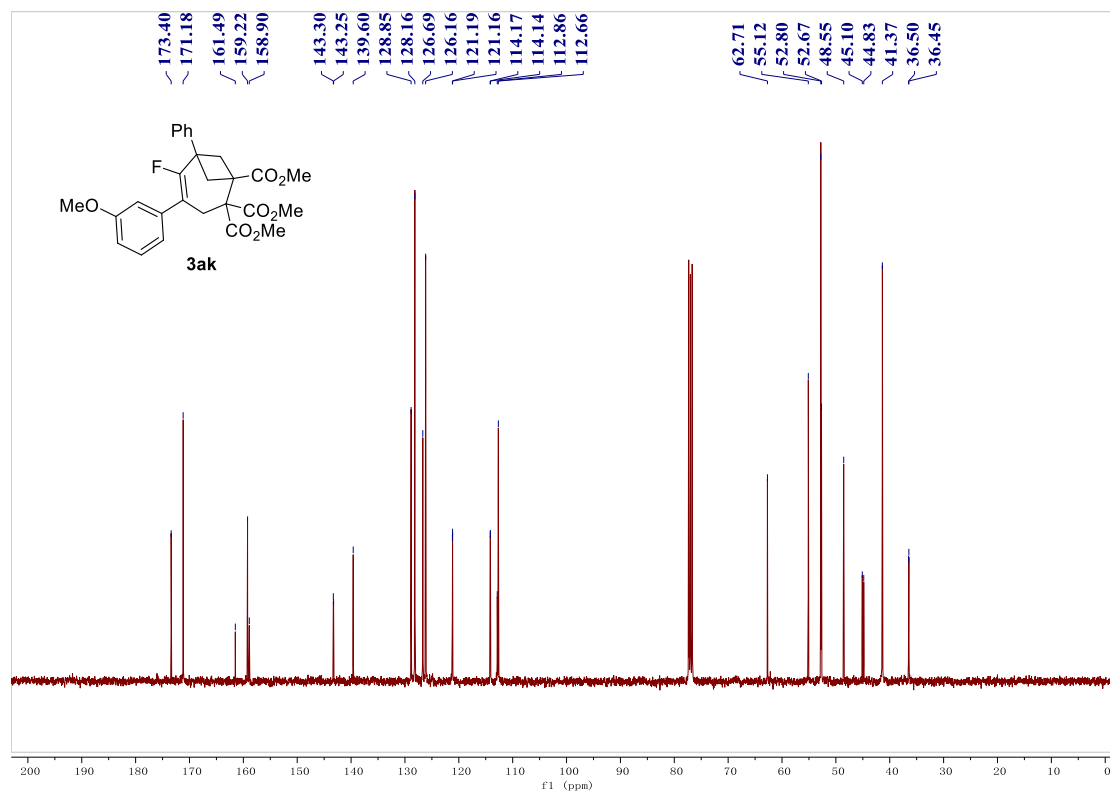

$^1\text{H}$  NMR (400MHz,  $\text{CDCl}_3$ ),  $^{19}\text{F}$  NMR (376 MHz,  $\text{CDCl}_3$ ) and  $^{13}\text{C}$  NMR (100 MHz,  $\text{CDCl}_3$ ) spectra of product **3al**

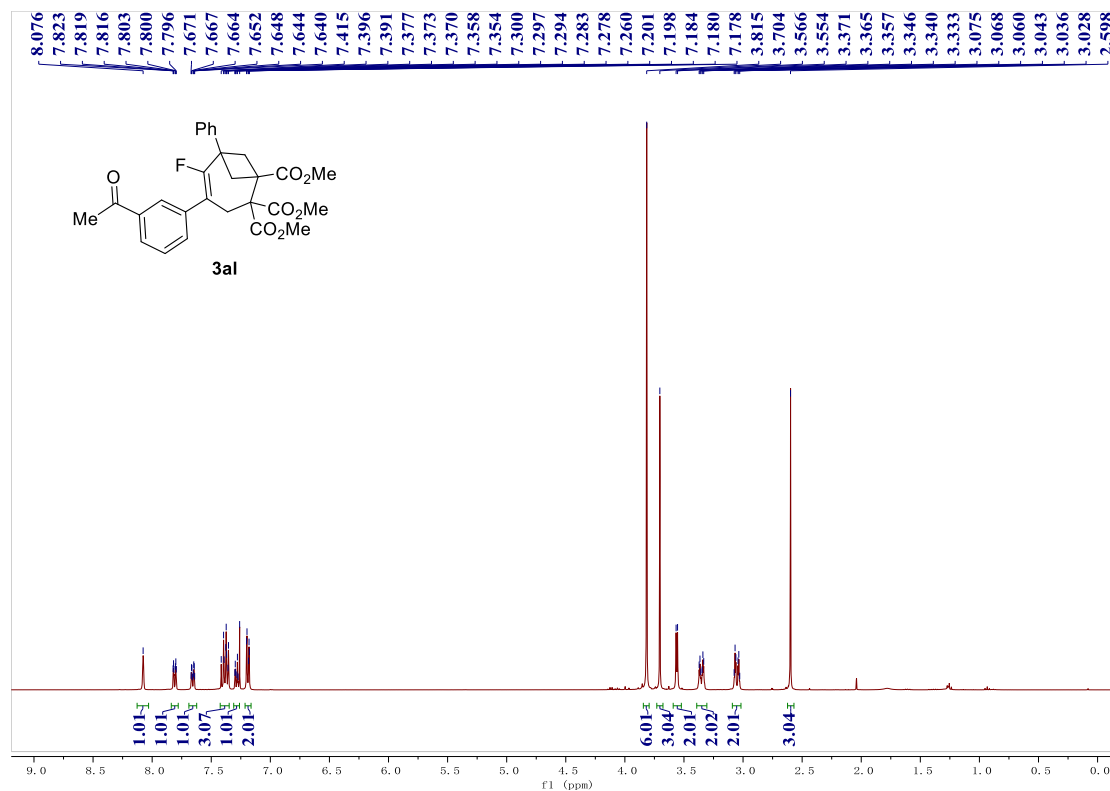

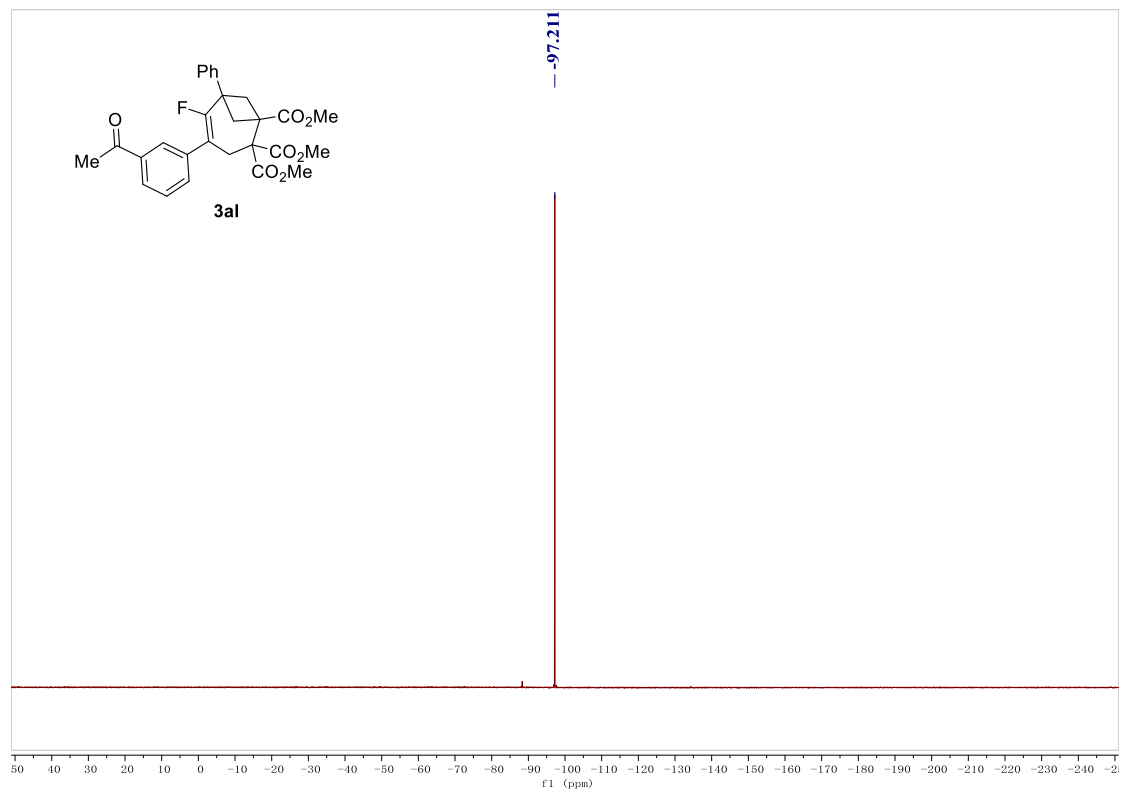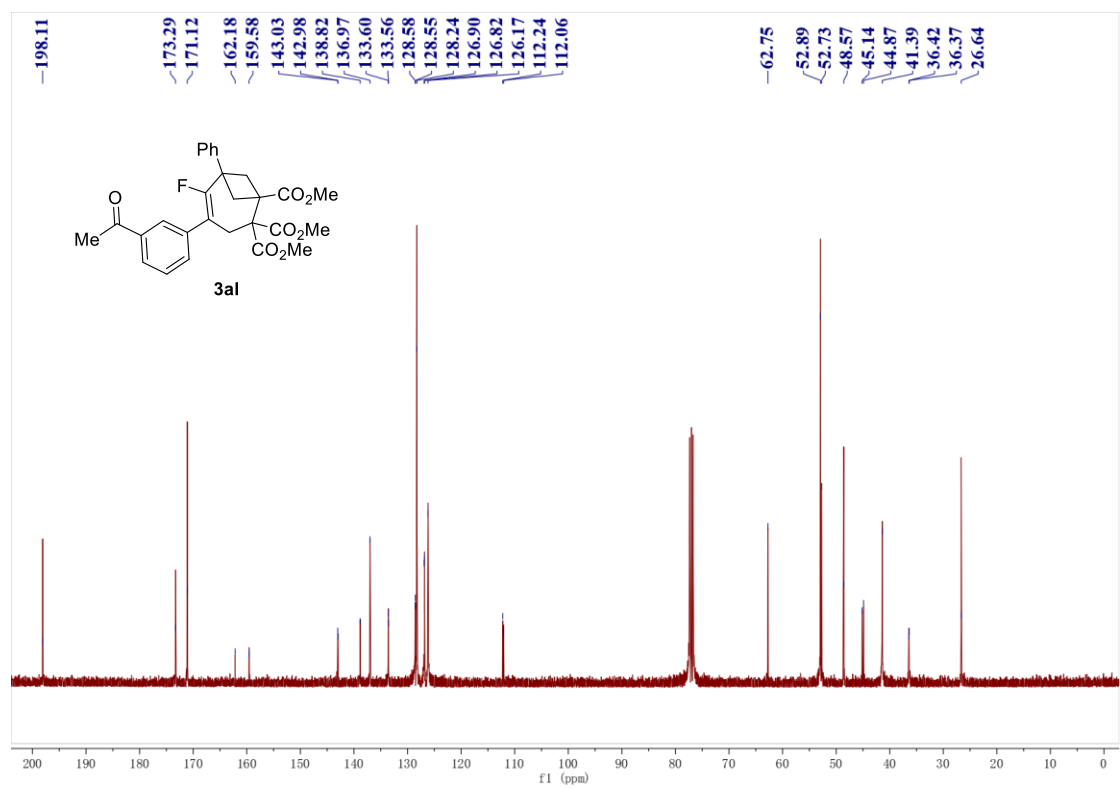

$^1\text{H}$  NMR (400MHz,  $\text{CDCl}_3$ ),  $^{19}\text{F}$  NMR (376 MHz,  $\text{CDCl}_3$ ) and  $^{13}\text{C}$  NMR (100 MHz,  $\text{CDCl}_3$ ) spectra of product **3am**

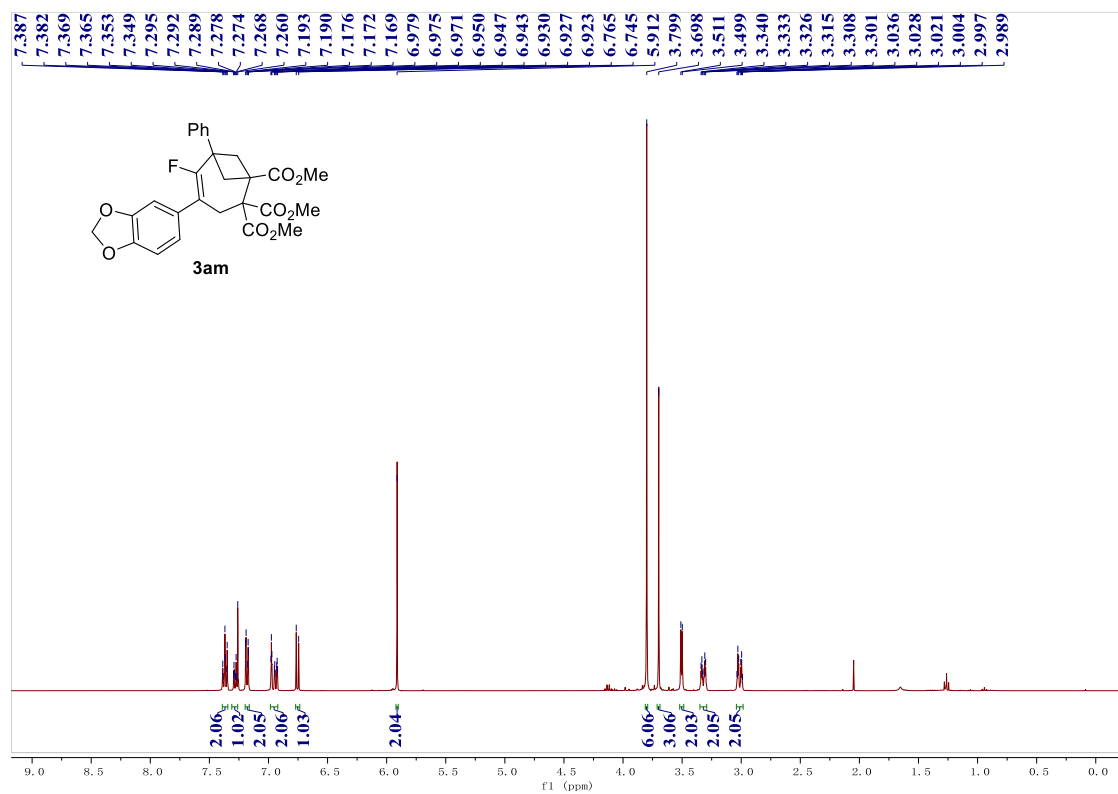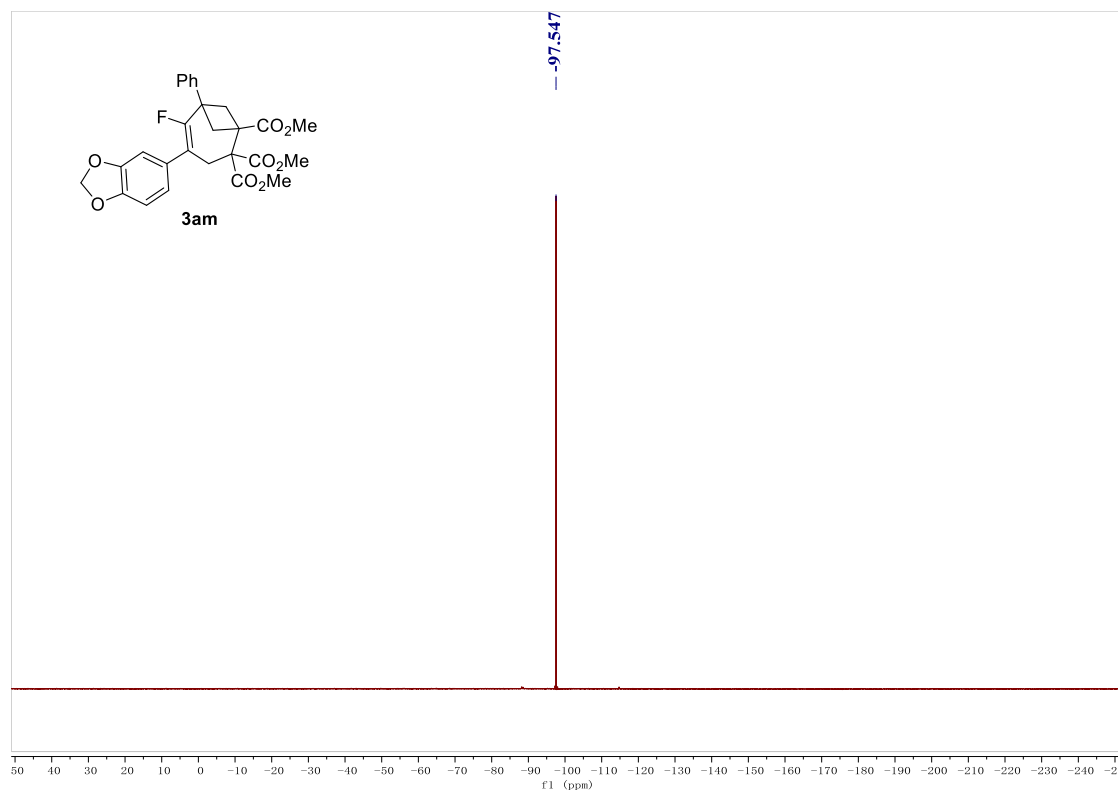

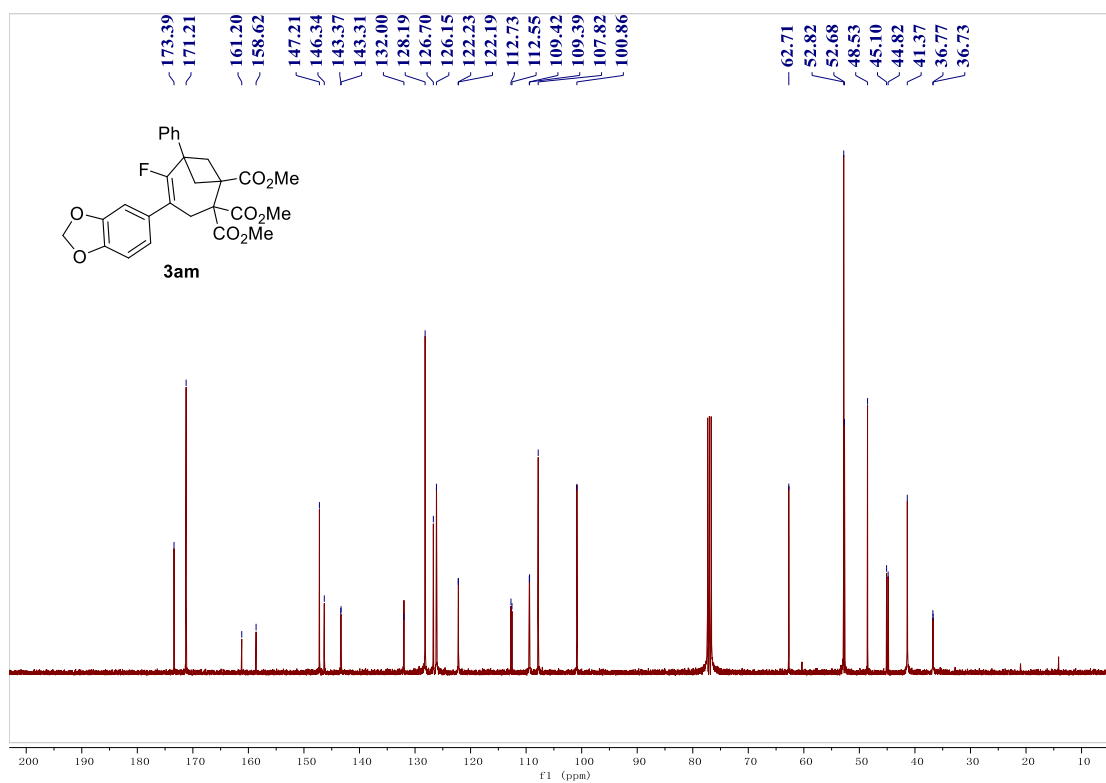

$^1\text{H}$  NMR (400MHz,  $\text{CDCl}_3$ ),  $^{19}\text{F}$  NMR (376 MHz,  $\text{CDCl}_3$ ) and  $^{13}\text{C}$  NMR (100 MHz,  $\text{CDCl}_3$ ) spectra of product **3an**

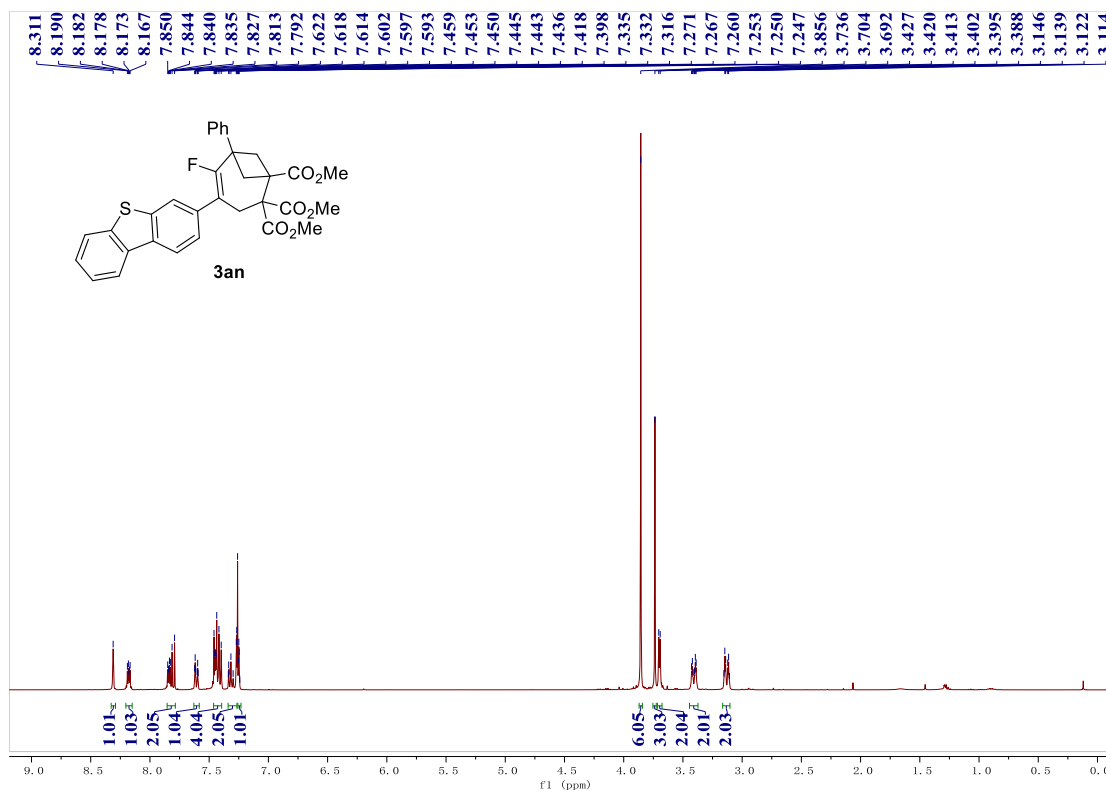

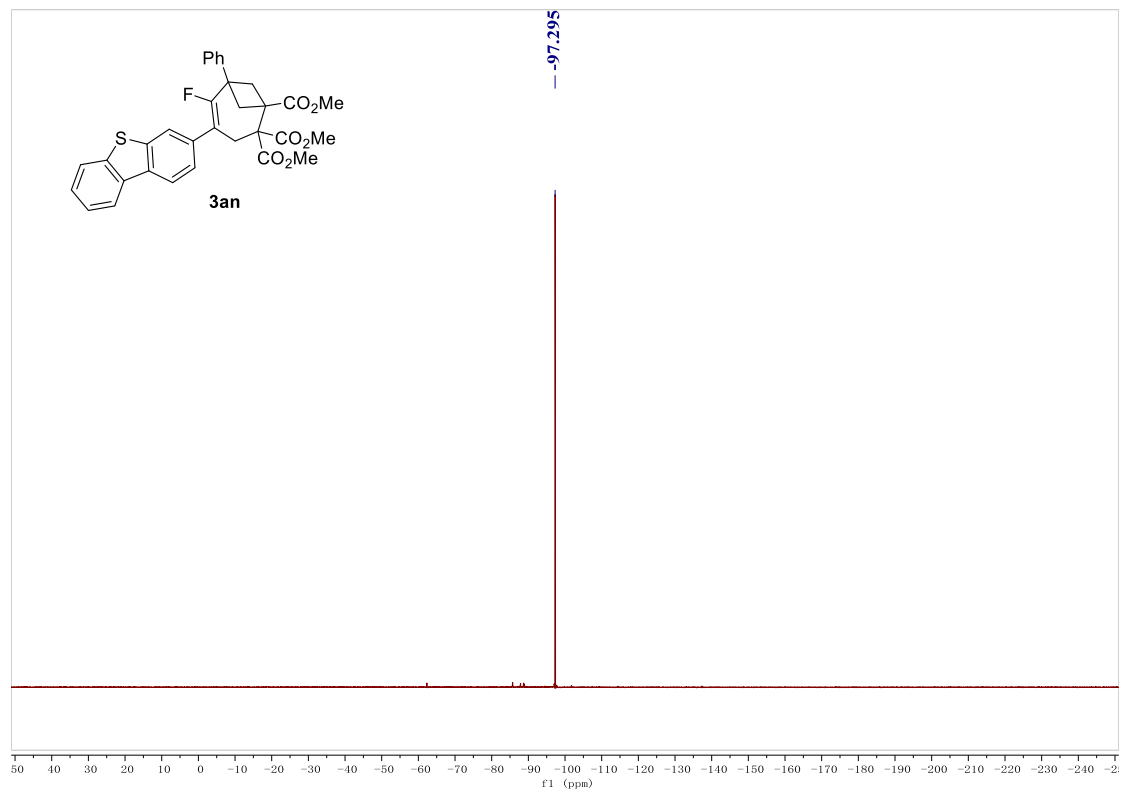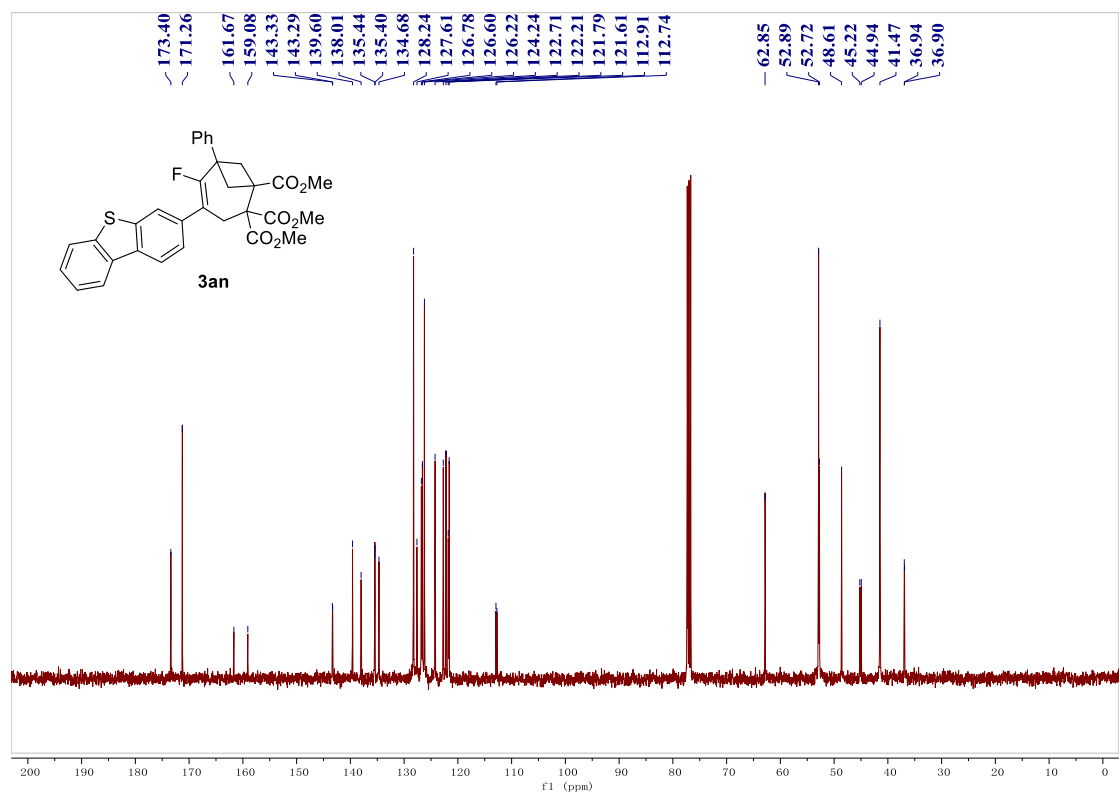

$^1\text{H}$  NMR (400MHz,  $\text{CDCl}_3$ ),  $^{19}\text{F}$  NMR (376 MHz,  $\text{CDCl}_3$ ) and  $^{13}\text{C}$  NMR (100 MHz,  $\text{CDCl}_3$ ) spectra of product **3ao**

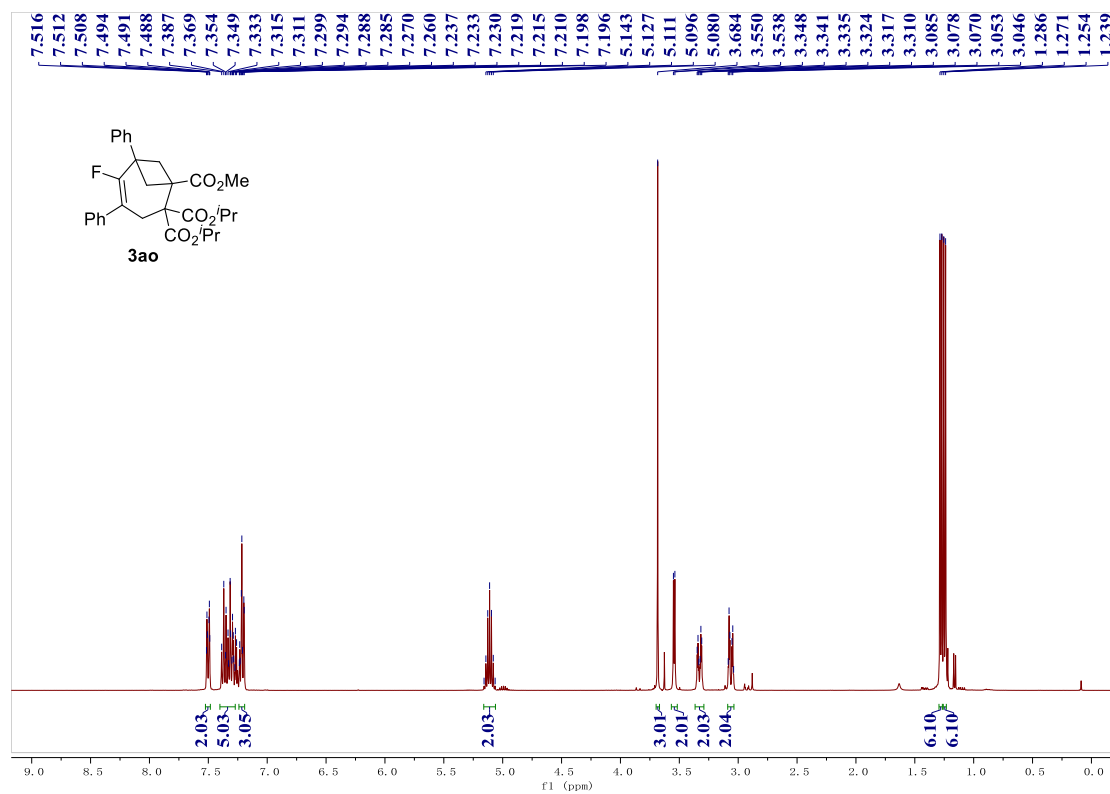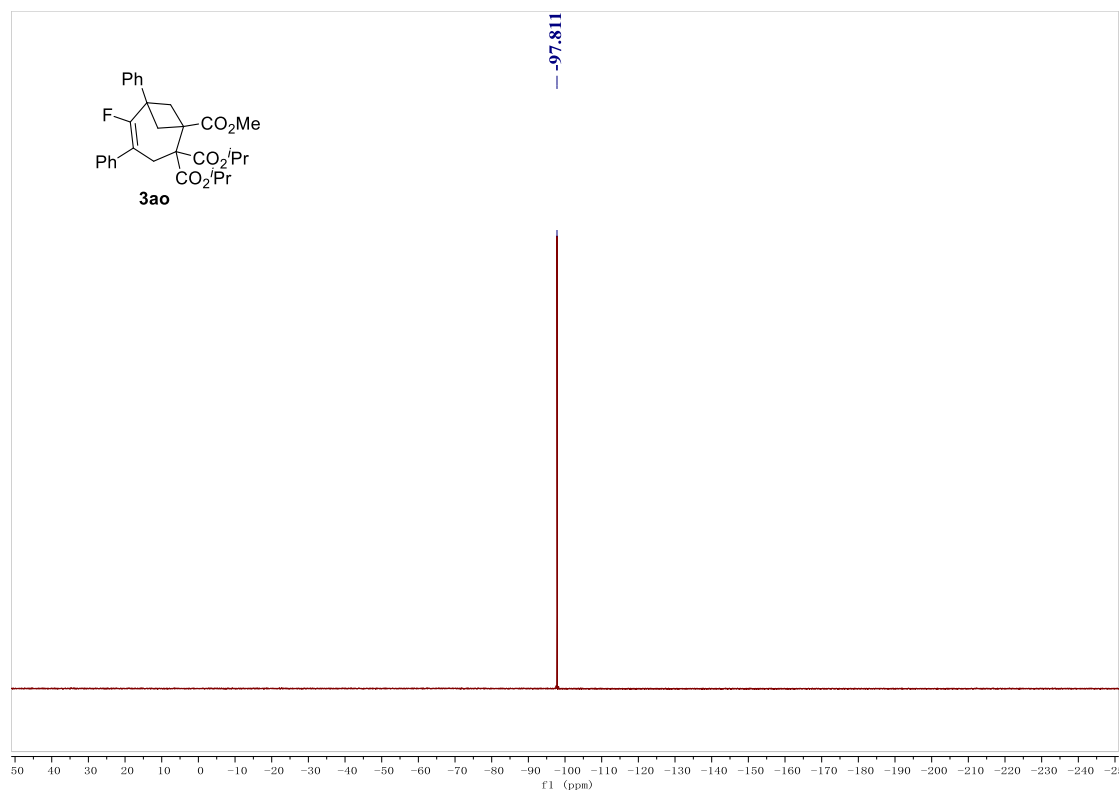

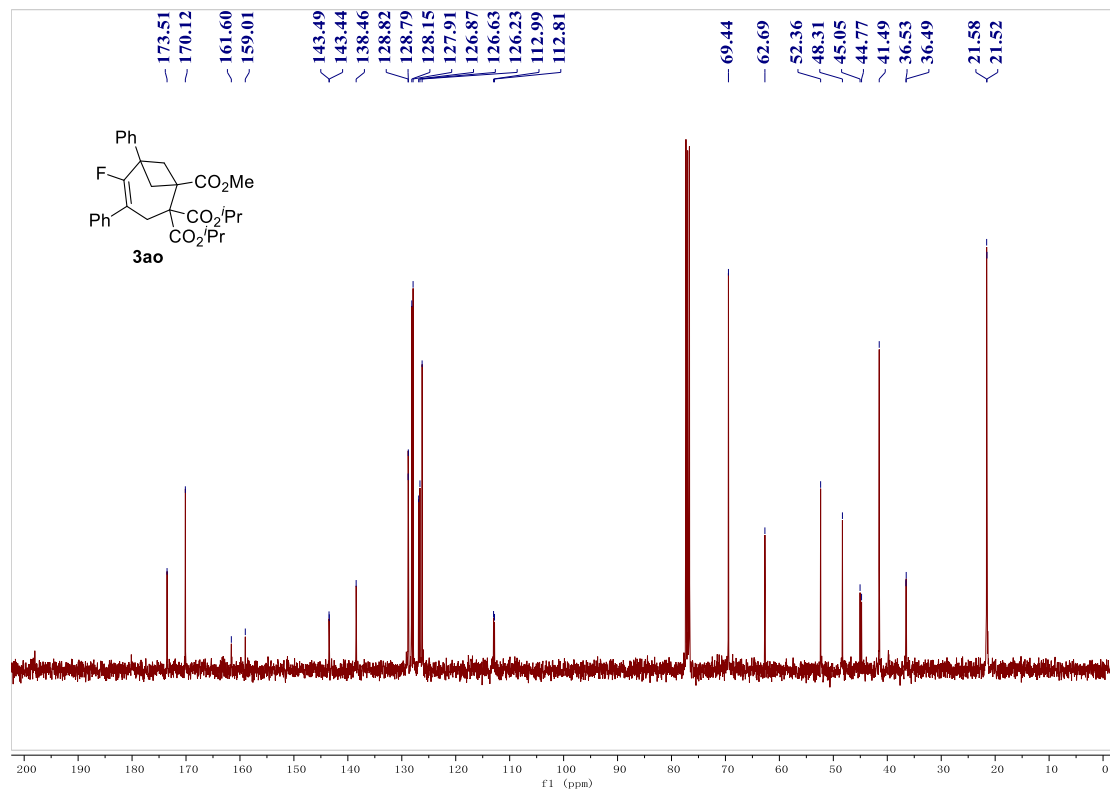

<sup>1</sup>H NMR (400MHz, CDCl<sub>3</sub>), <sup>19</sup>F NMR (376 MHz, CDCl<sub>3</sub>) and <sup>13</sup>C NMR (100 MHz, CDCl<sub>3</sub>) spectra of product **3ap**

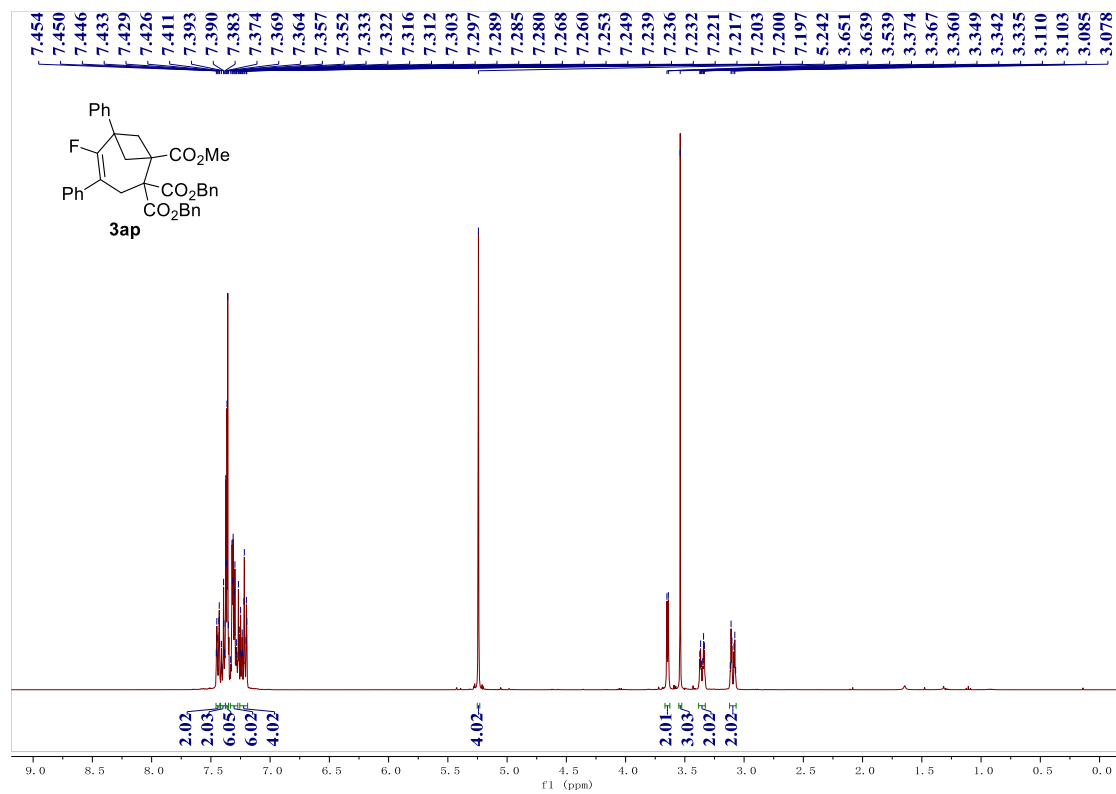



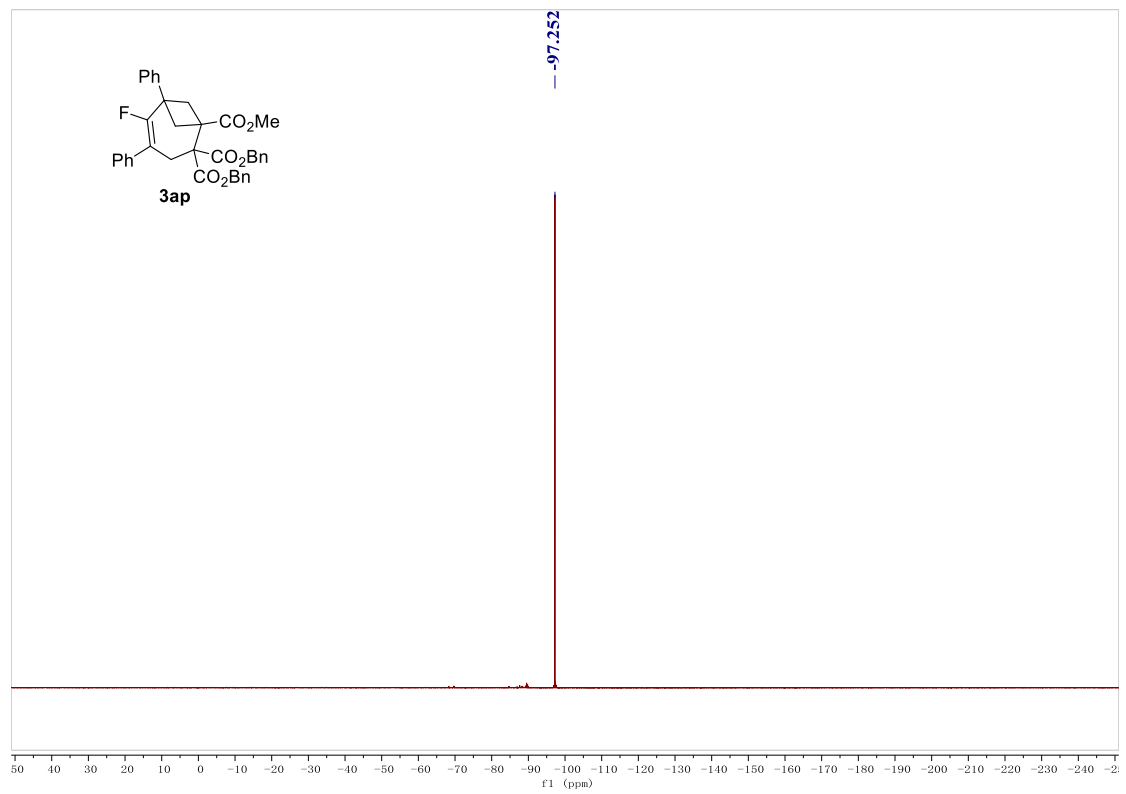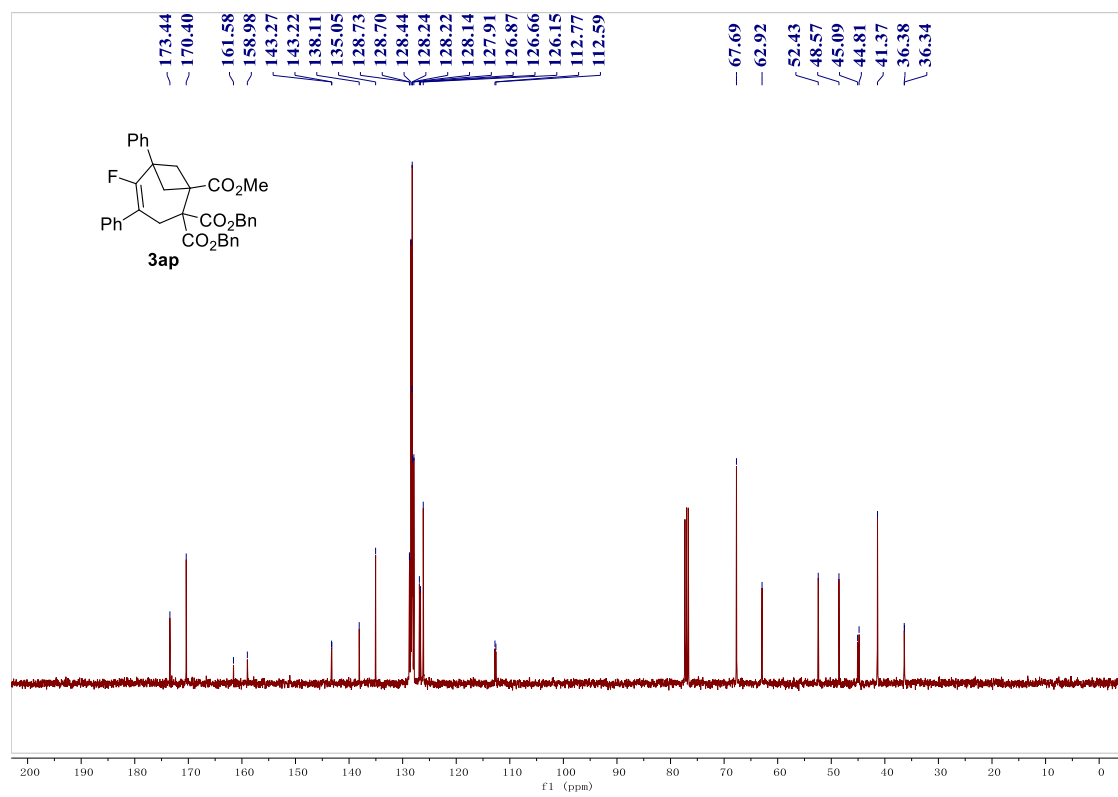

$^1\text{H}$  NMR (400MHz,  $\text{CDCl}_3$ ),  $^{19}\text{F}$  NMR (376 MHz,  $\text{CDCl}_3$ ) and  $^{13}\text{C}$  NMR (100 MHz,  $\text{CDCl}_3$ ) spectra of product **3aq**

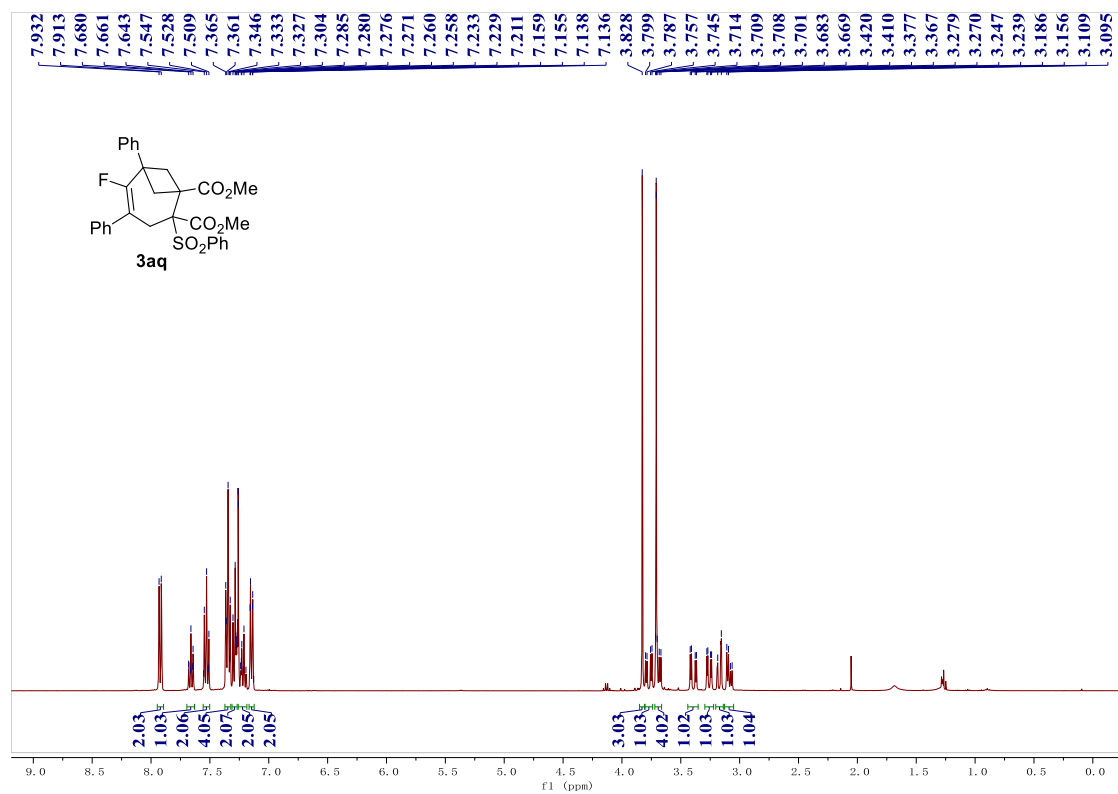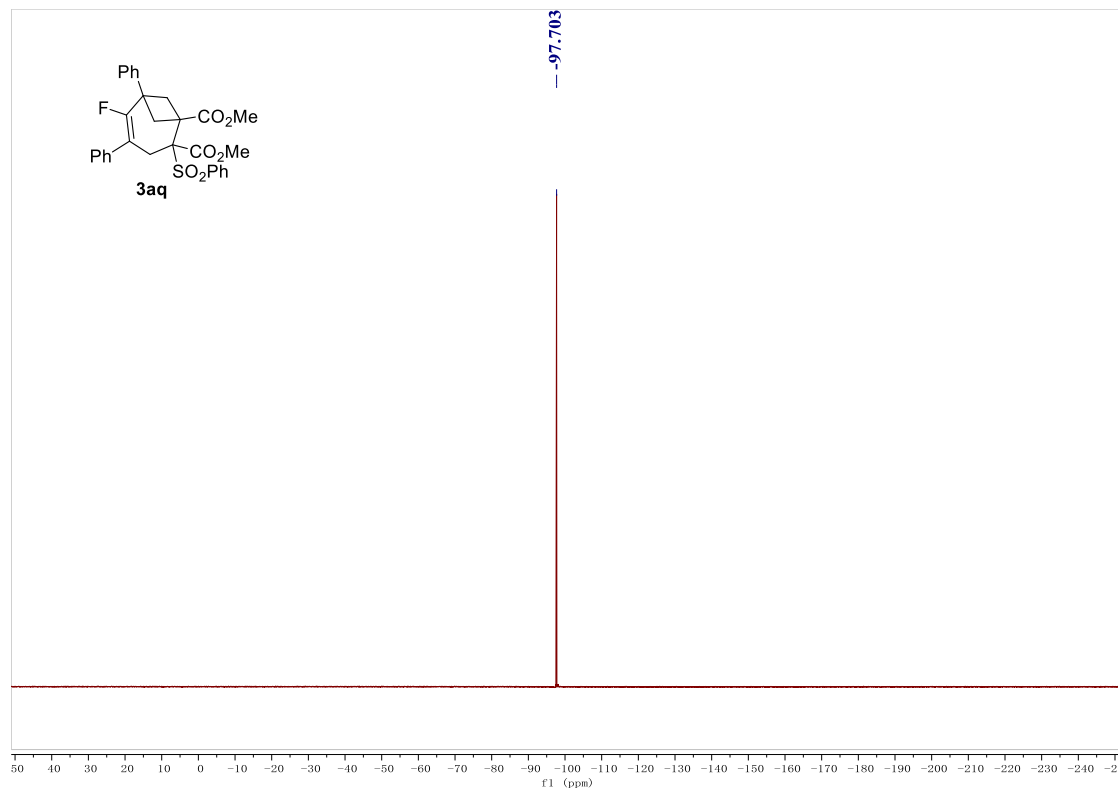

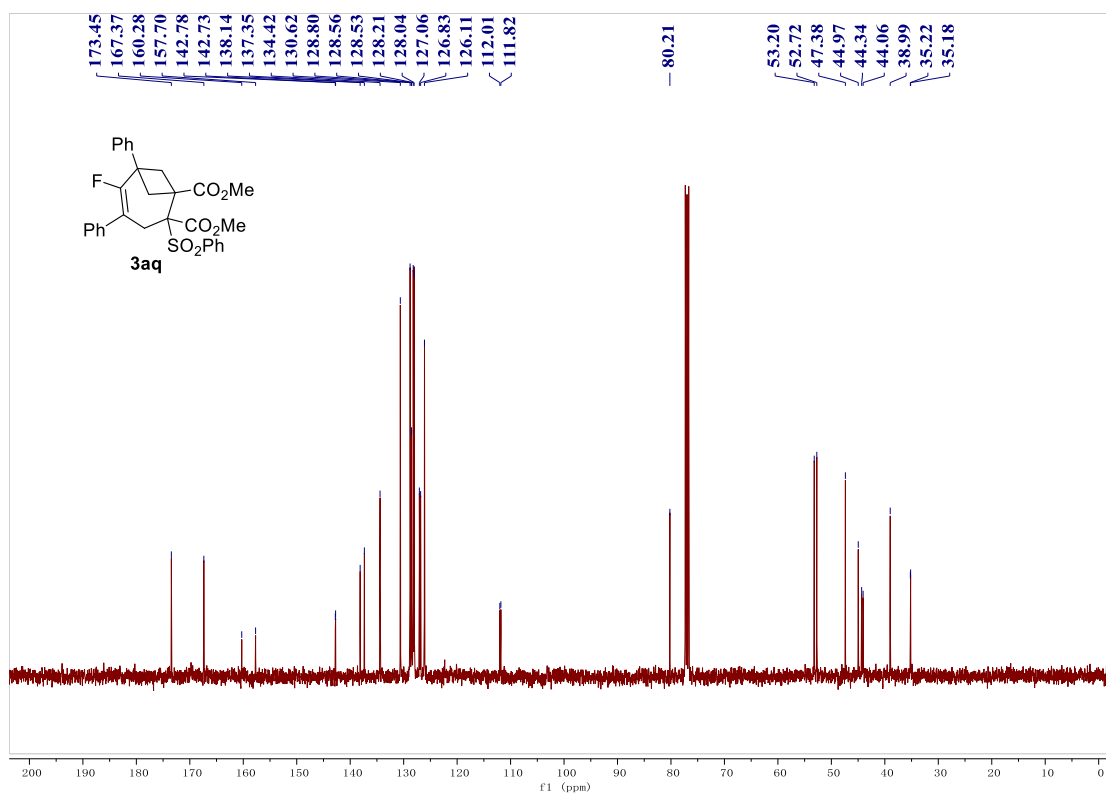

$^1\text{H}$  NMR (400MHz,  $\text{CDCl}_3$ ),  $^{19}\text{F}$  NMR (376 MHz,  $\text{CDCl}_3$ ) and  $^{13}\text{C}$  NMR (100 MHz,  $\text{CDCl}_3$ ) spectra of product **3ar**

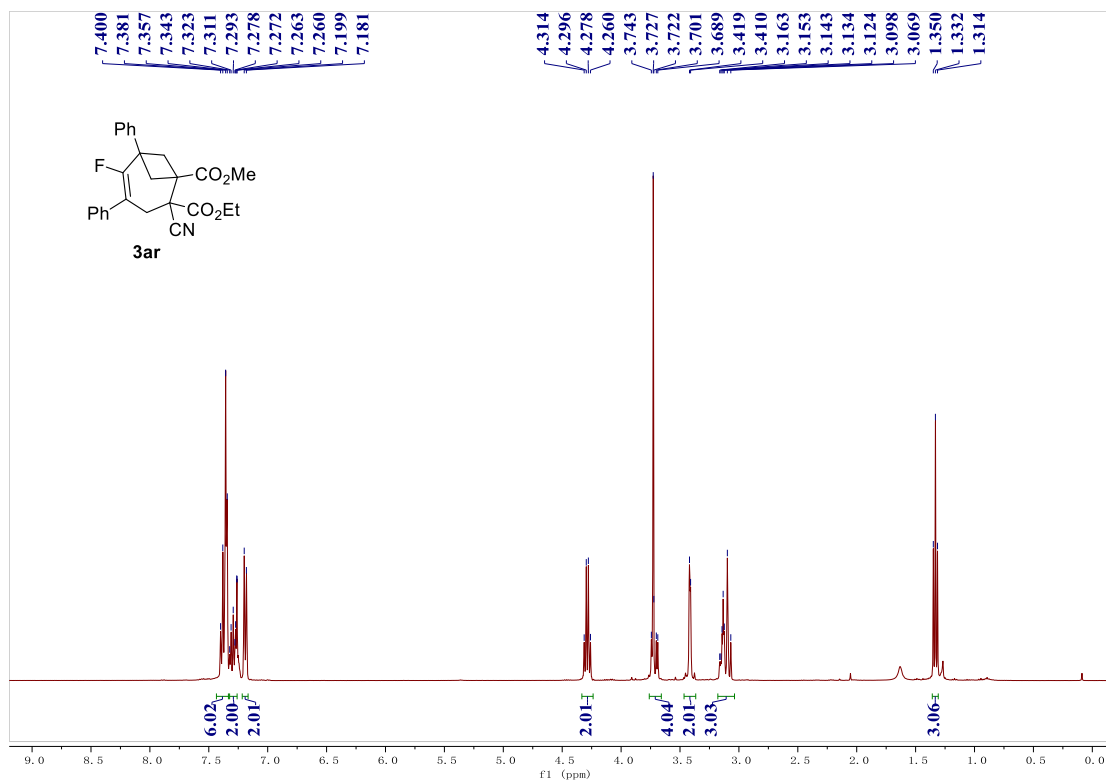

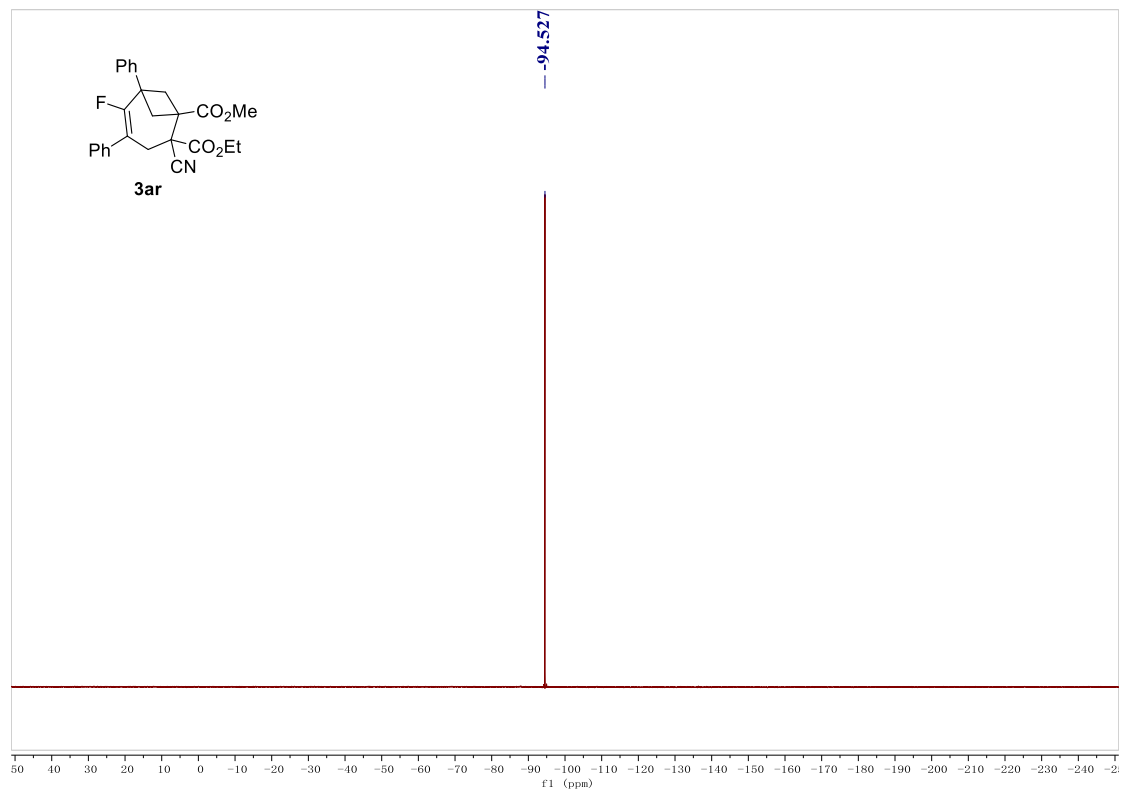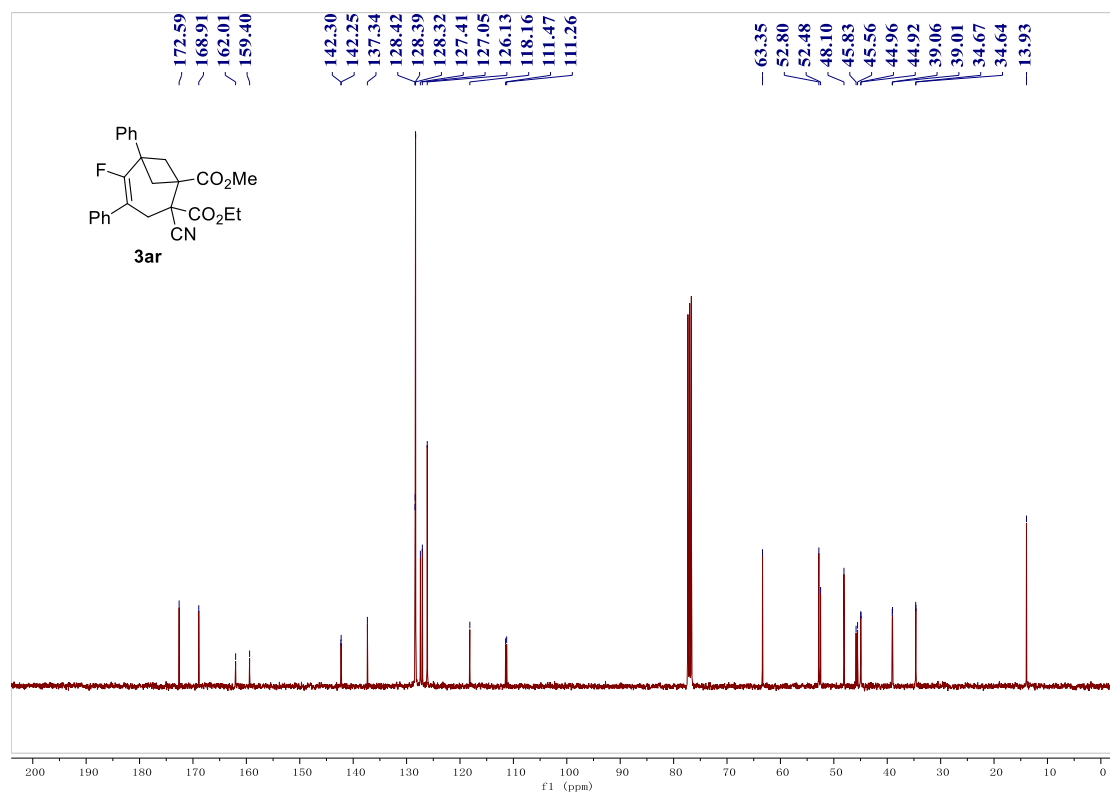

$^1\text{H}$  NMR (400MHz,  $\text{CDCl}_3$ ),  $^{19}\text{F}$  NMR (376 MHz,  $\text{CDCl}_3$ ) and  $^{13}\text{C}$  NMR (100 MHz,  $\text{CDCl}_3$ ) spectra of product **4aa**

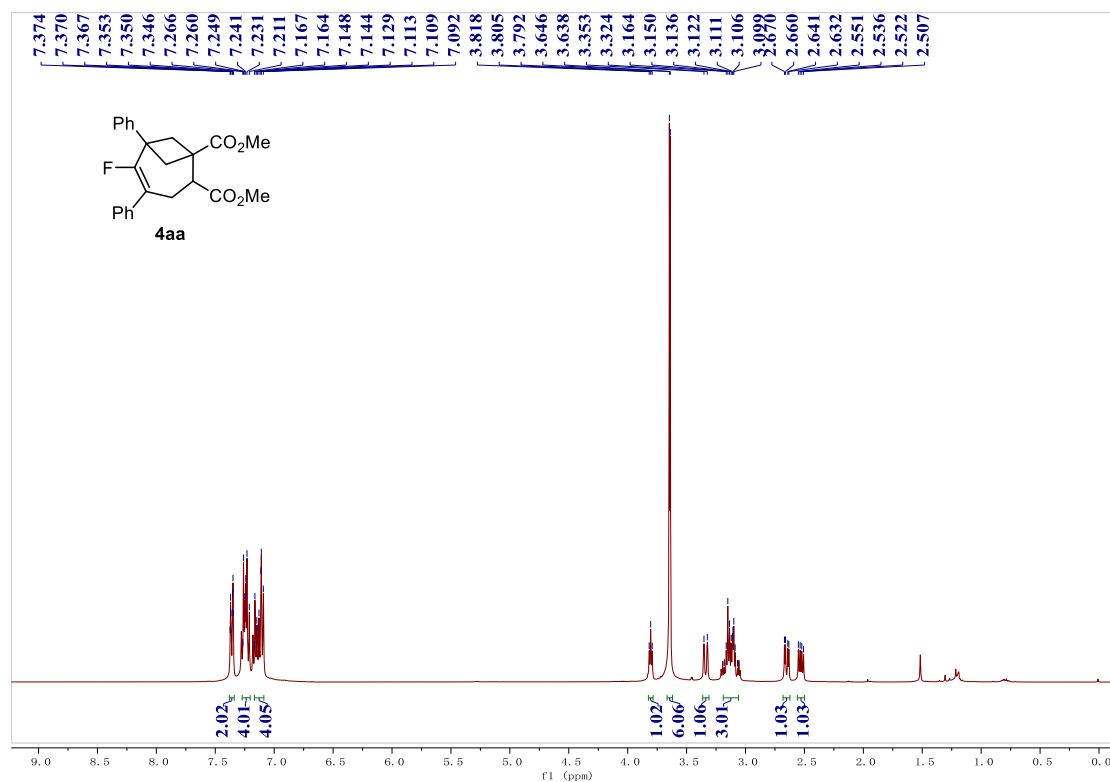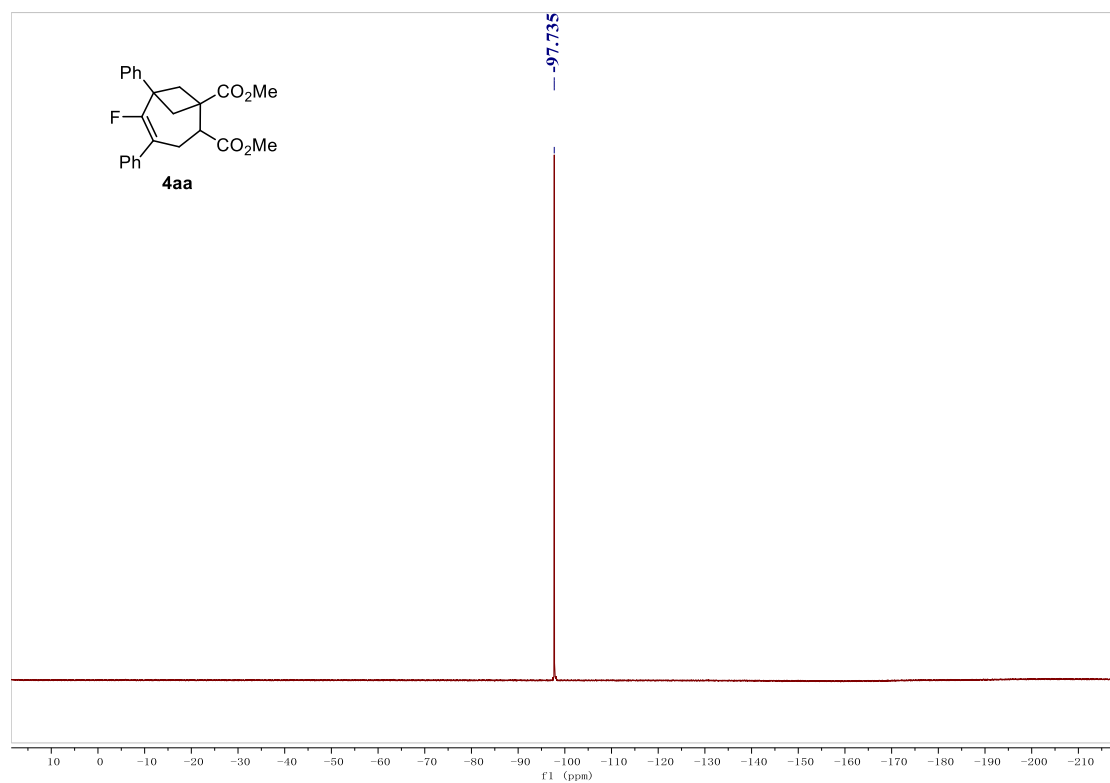

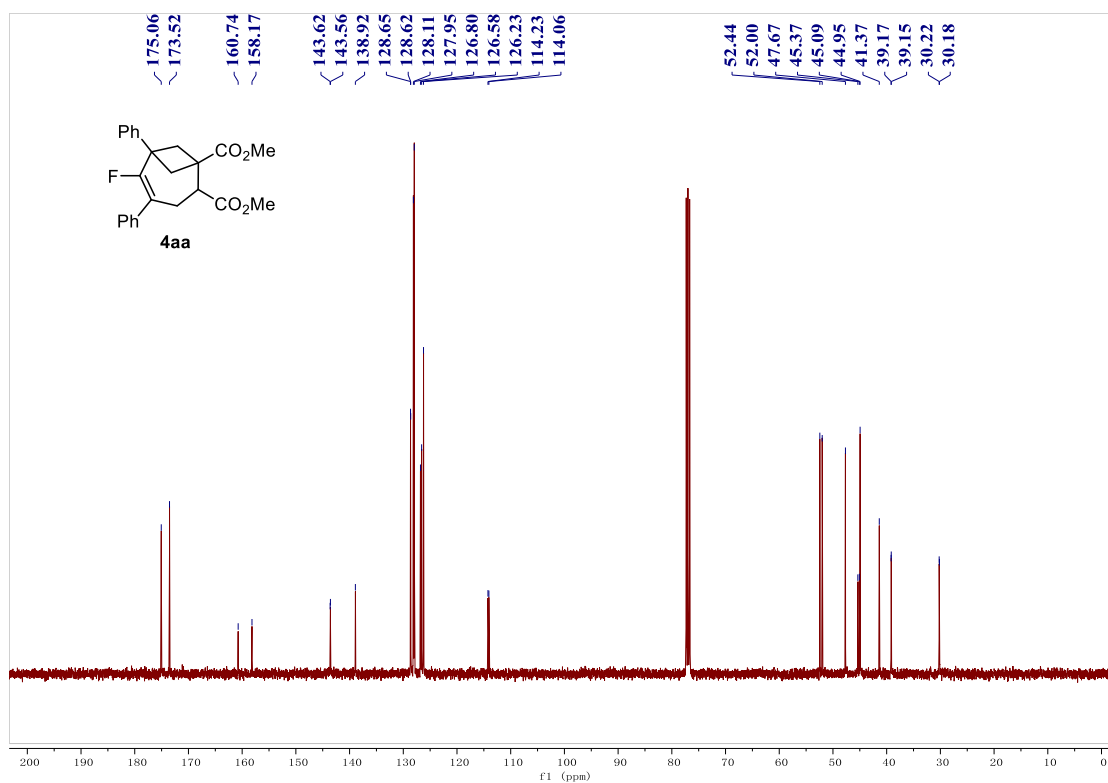

<sup>1</sup>H NMR (400MHz, CDCl<sub>3</sub>), <sup>19</sup>F NMR (376 MHz, CDCl<sub>3</sub>) and <sup>13</sup>C NMR (100 MHz, CDCl<sub>3</sub>) spectra of product **5aa**

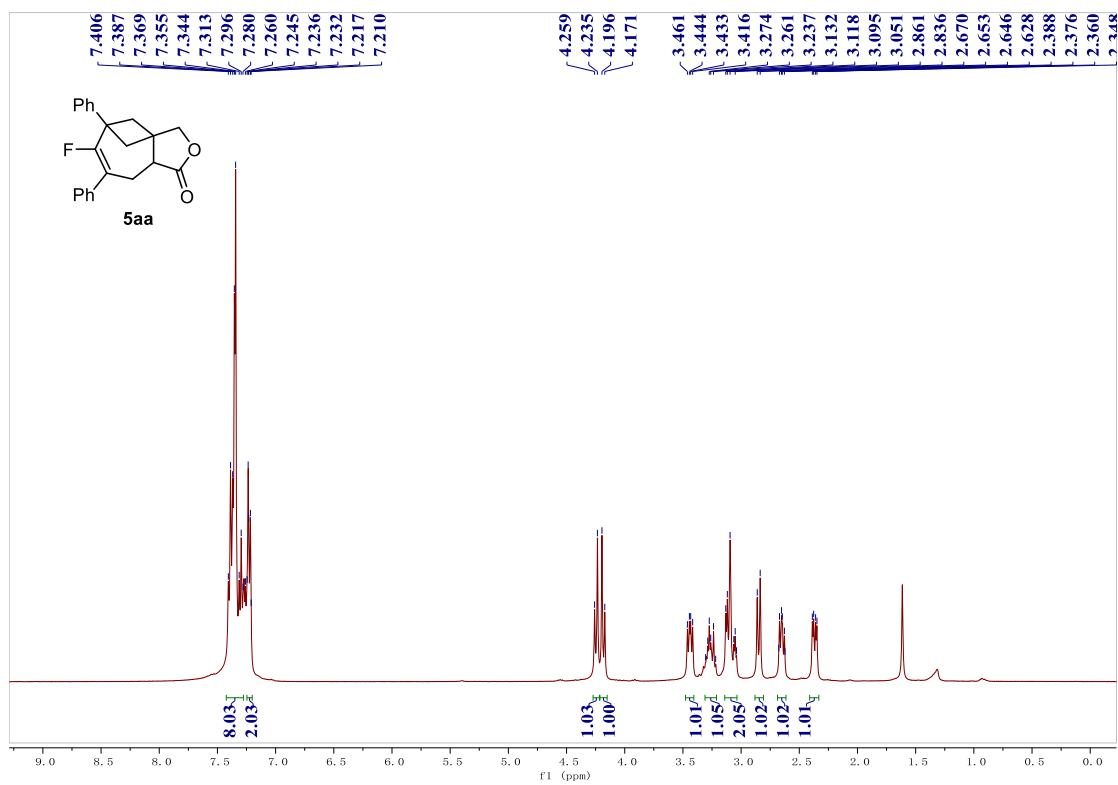

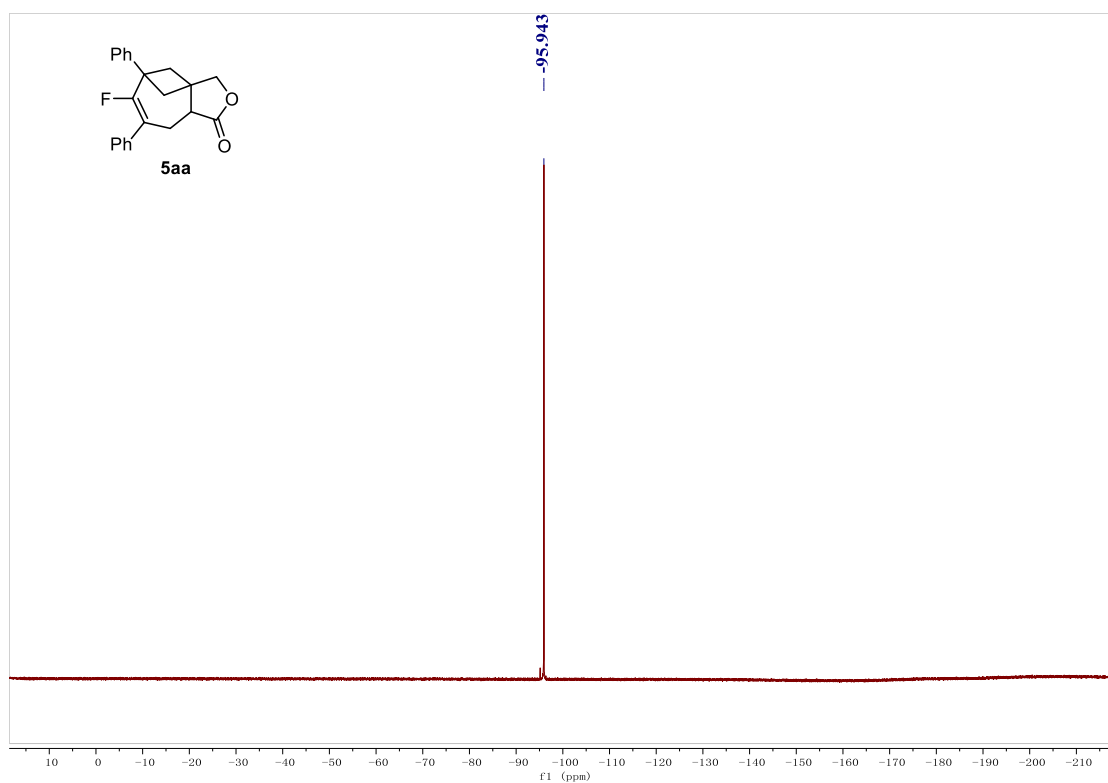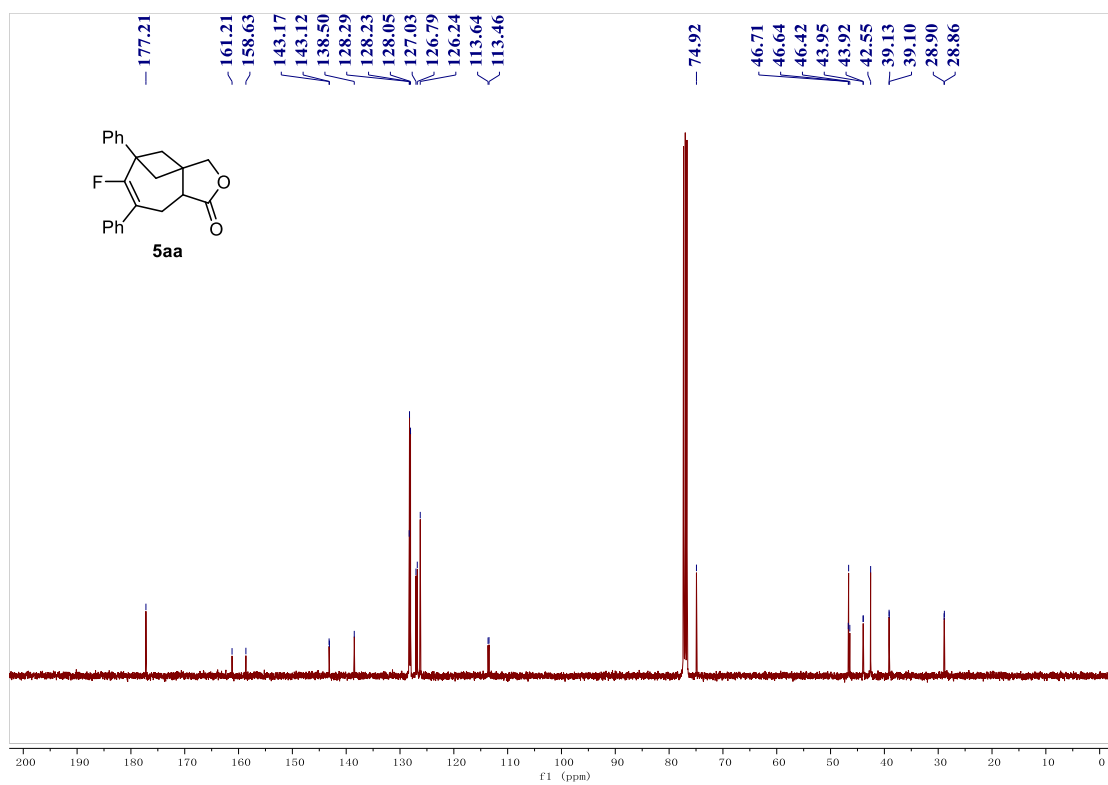

$^1\text{H}$  NMR (400MHz,  $\text{CDCl}_3$ ),  $^{19}\text{F}$  NMR (376 MHz,  $\text{CDCl}_3$ ) and  $^{13}\text{C}$  NMR (100 MHz,  $\text{CDCl}_3$ ) spectra of product **6ka**

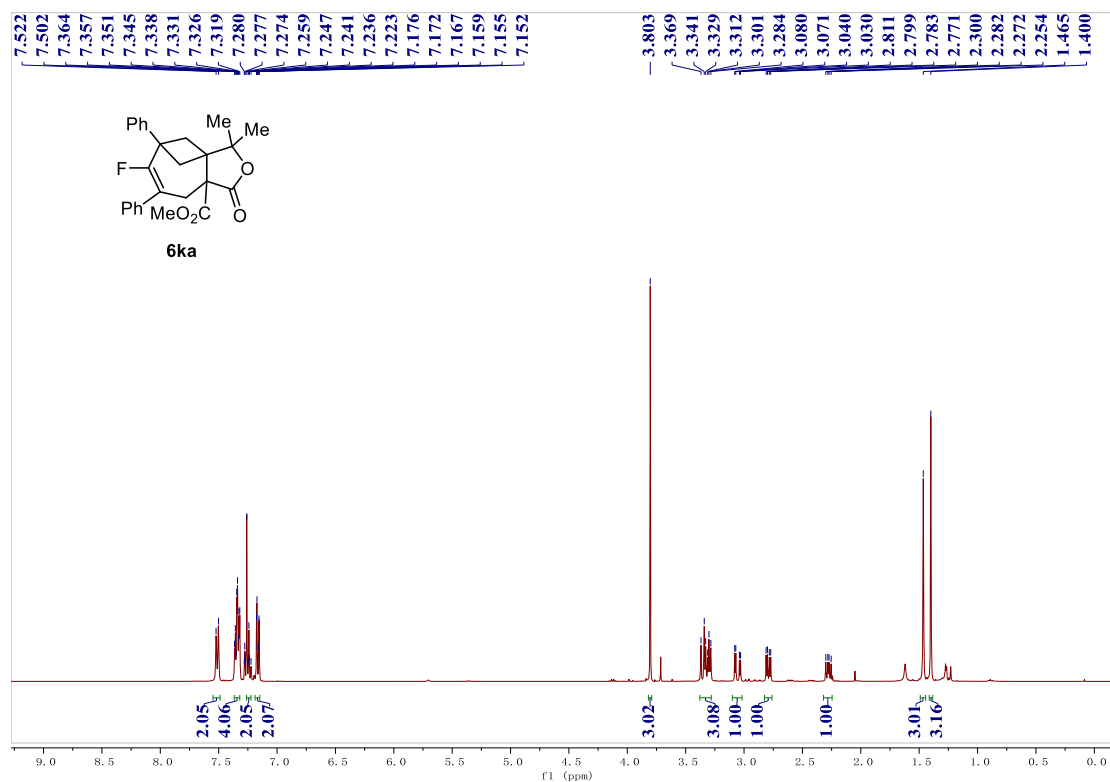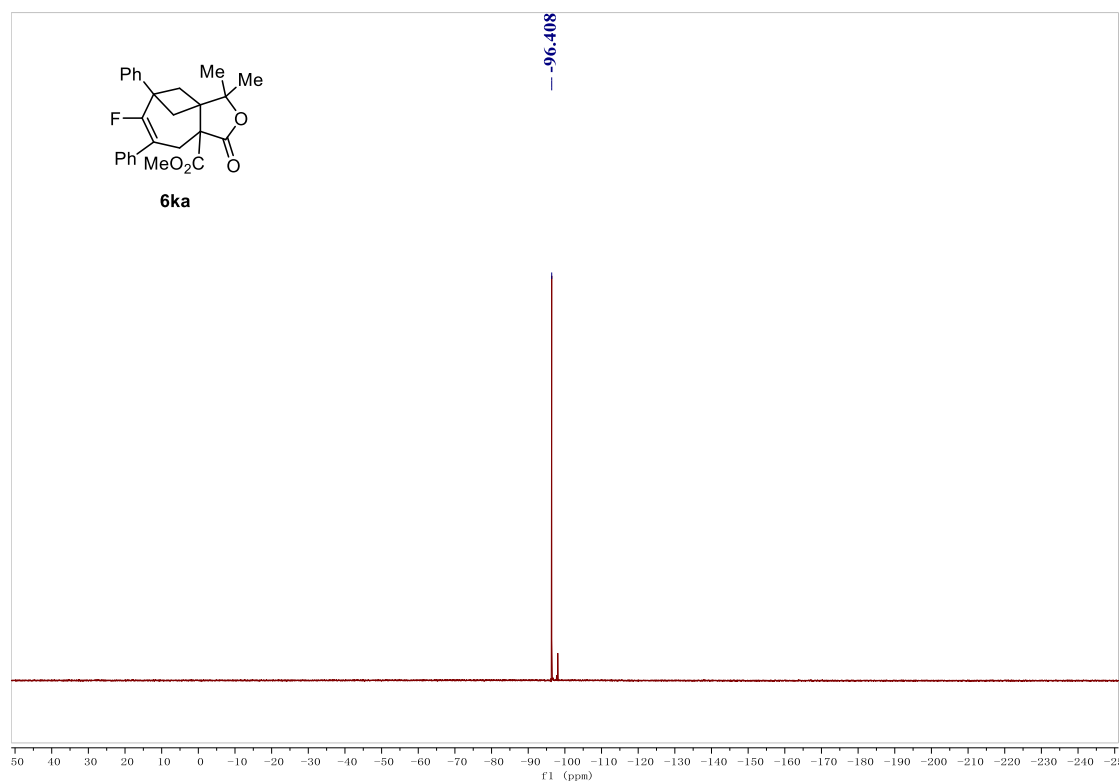



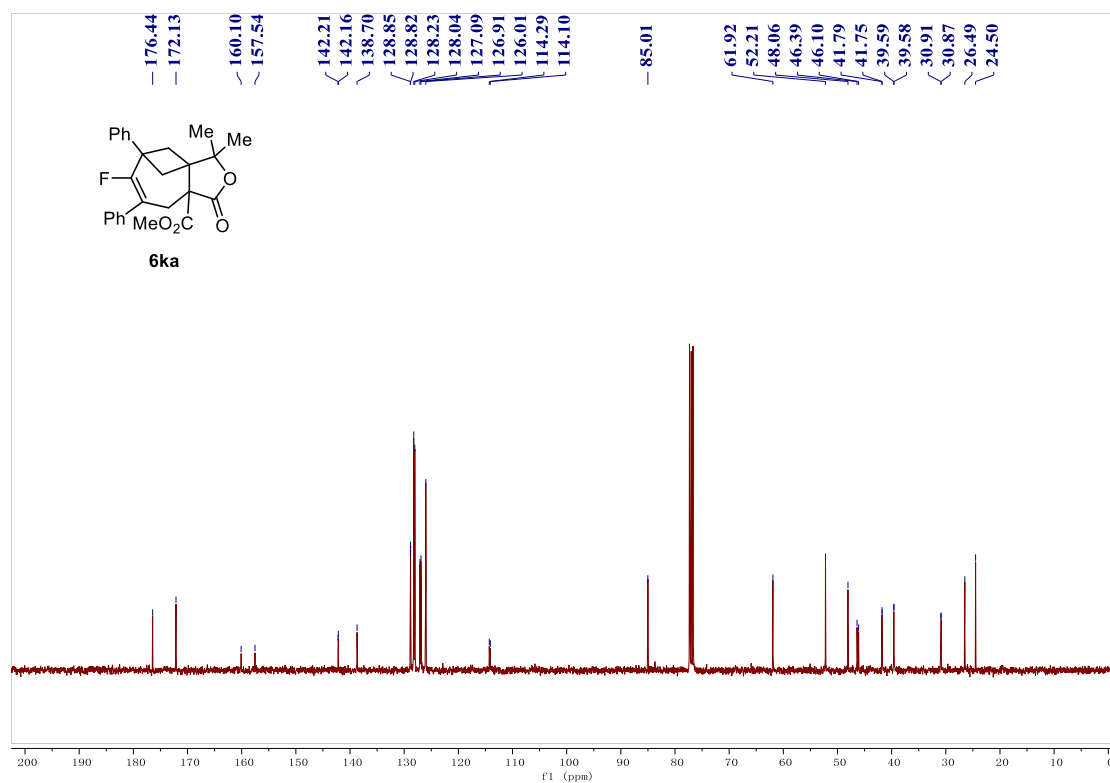

<sup>1</sup>H NMR (400MHz, CDCl<sub>3</sub>), <sup>19</sup>F NMR (376 MHz, CDCl<sub>3</sub>) and <sup>13</sup>C NMR (100 MHz, CDCl<sub>3</sub>) spectra of product **6ka**'

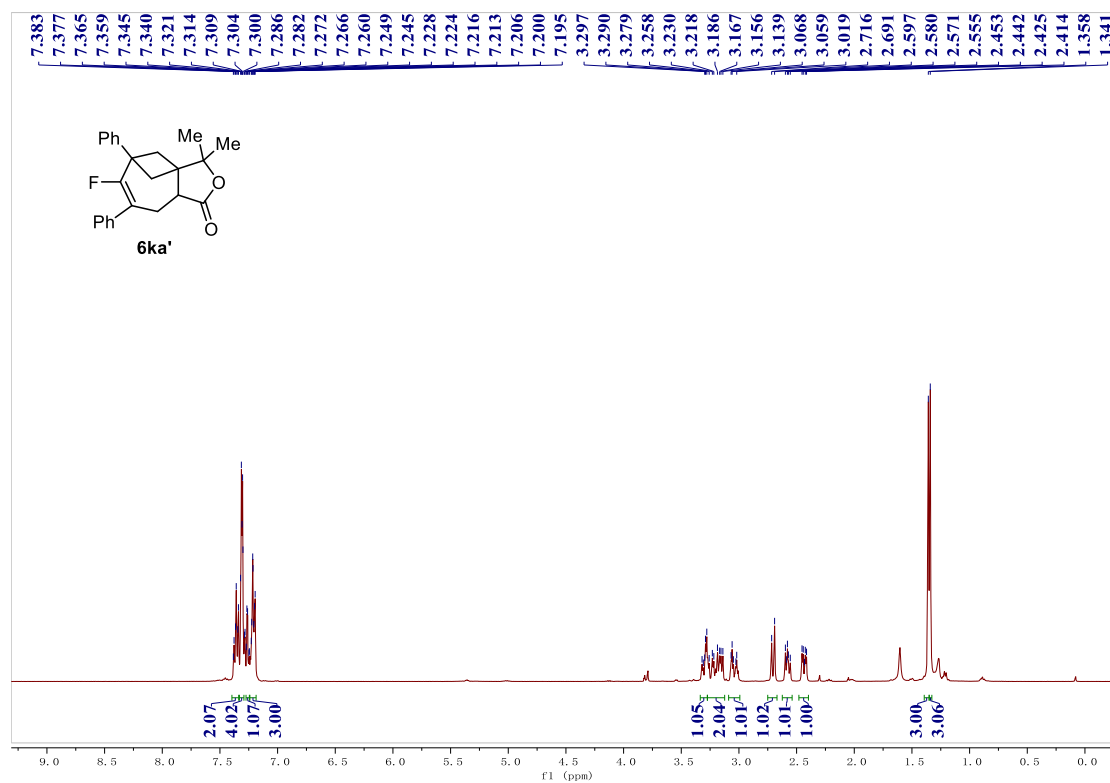

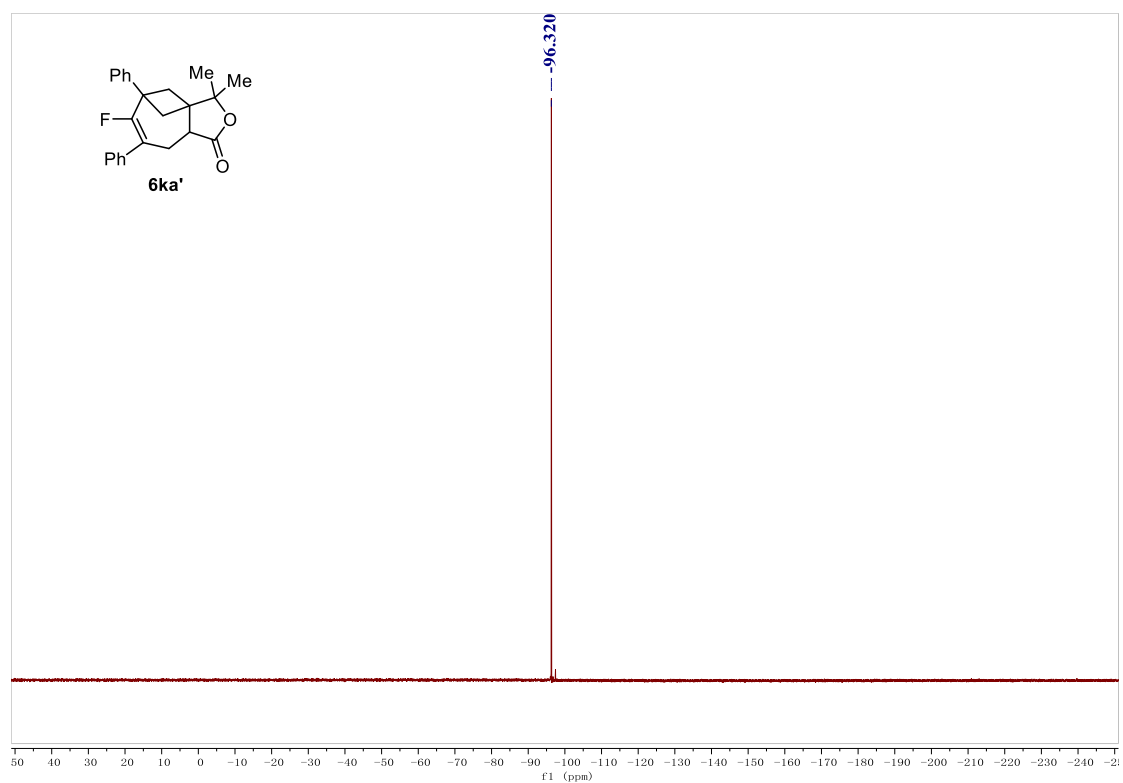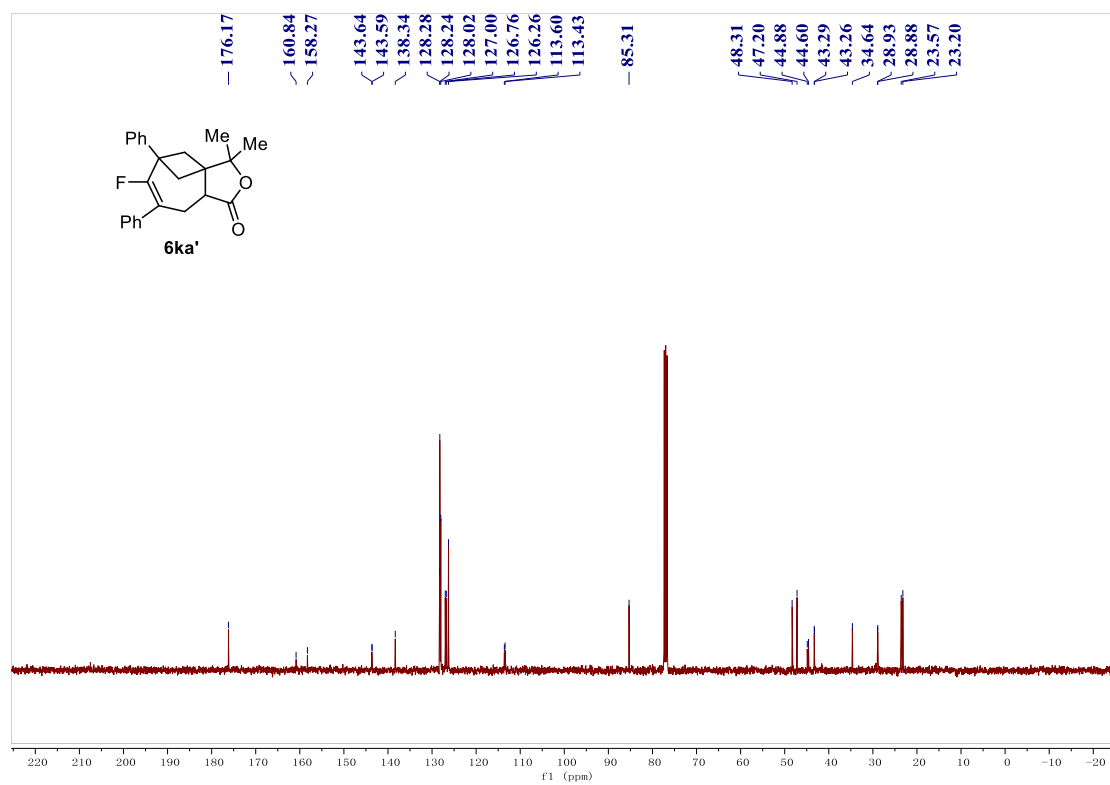

$^1\text{H}$  NMR (400MHz, DMSO-d<sub>6</sub>),  $^{19}\text{F}$  NMR (376 MHz, DMSO-d<sub>6</sub>) and  $^{13}\text{C}$  NMR (100 MHz, DMSO-d<sub>6</sub>) spectra of product **7la**

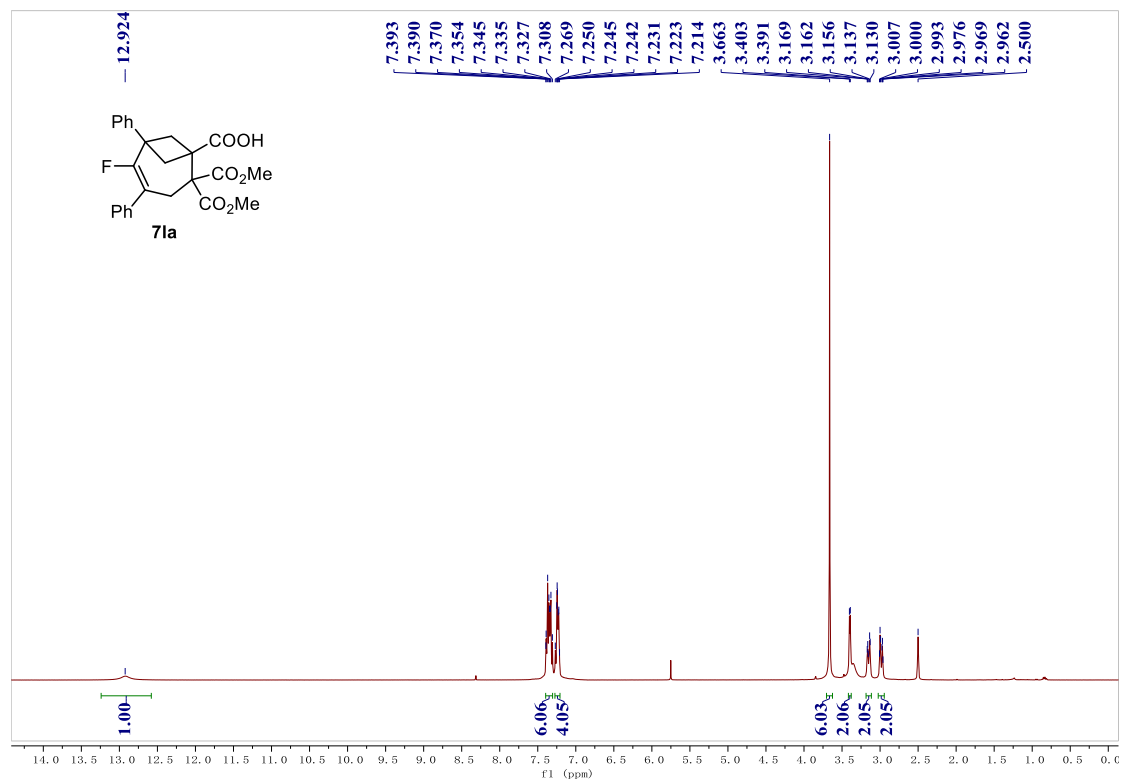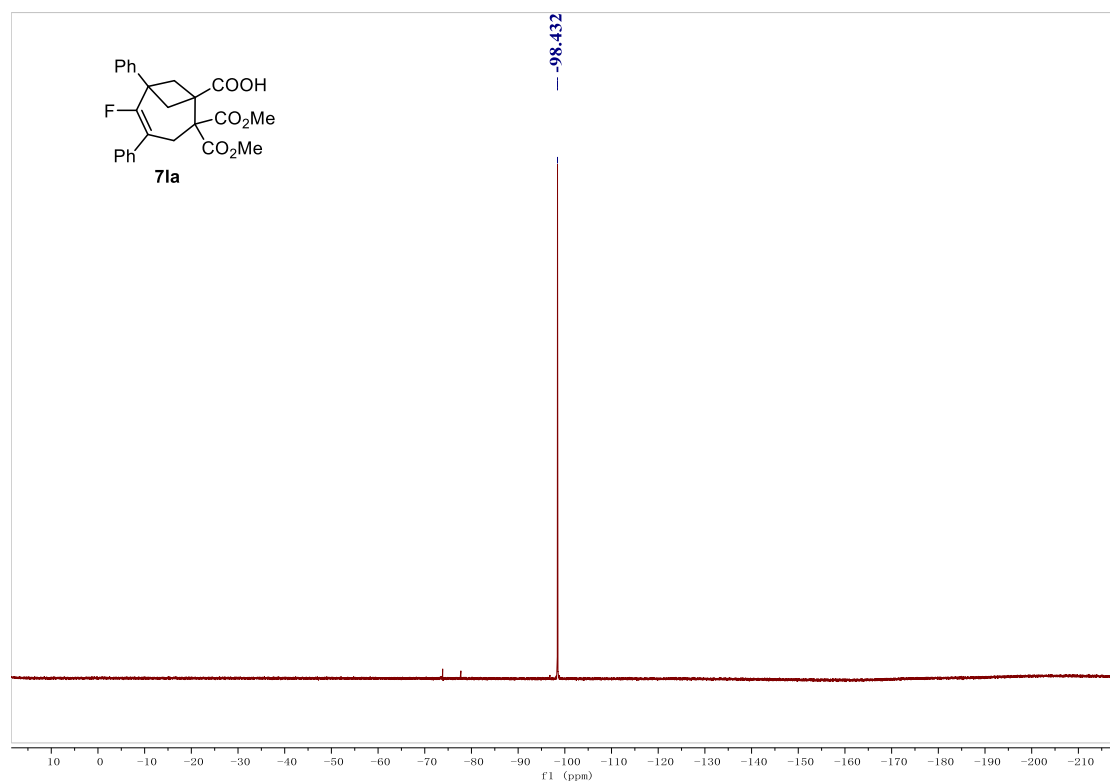

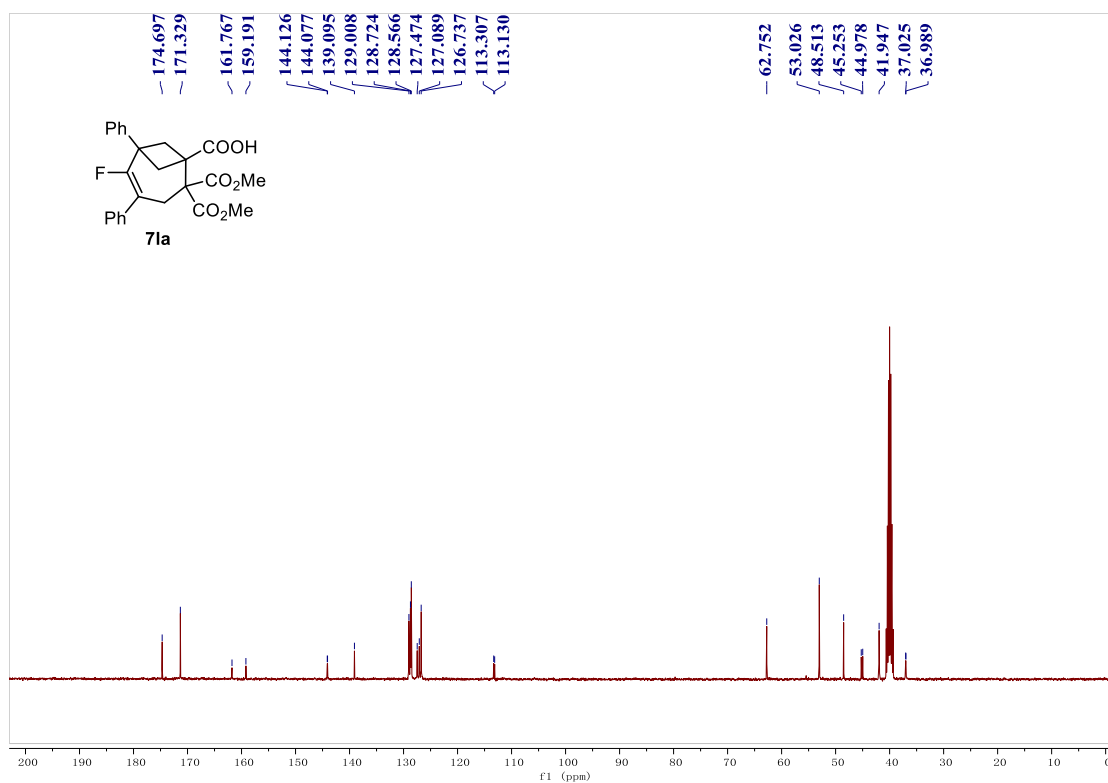

<sup>1</sup>H NMR (400MHz, CDCl<sub>3</sub>), <sup>19</sup>F NMR (376 MHz, CDCl<sub>3</sub>) and <sup>13</sup>C NMR (100 MHz, CDCl<sub>3</sub>) spectra of product **8la**

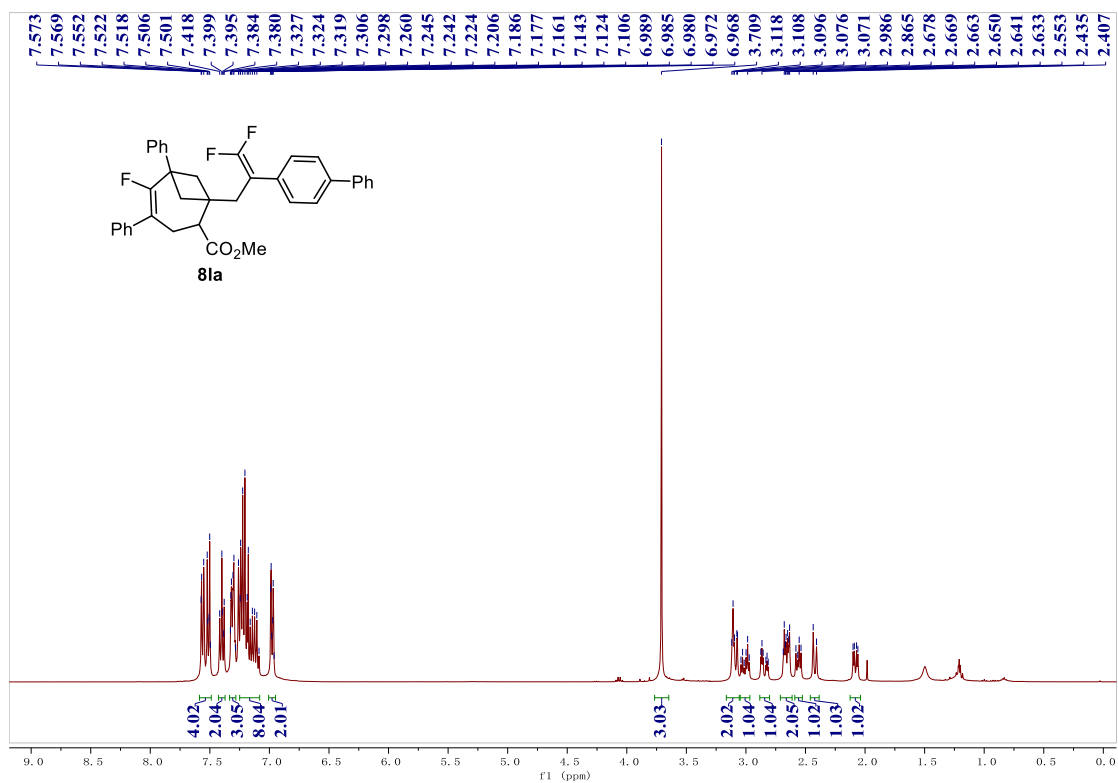

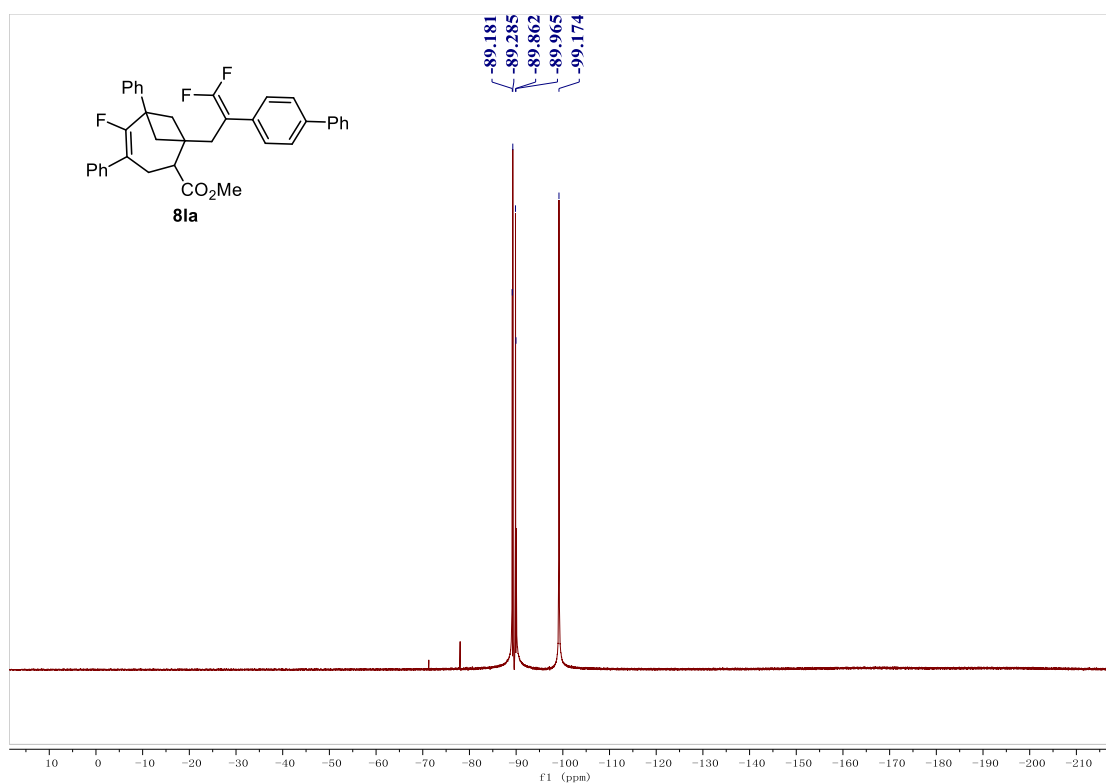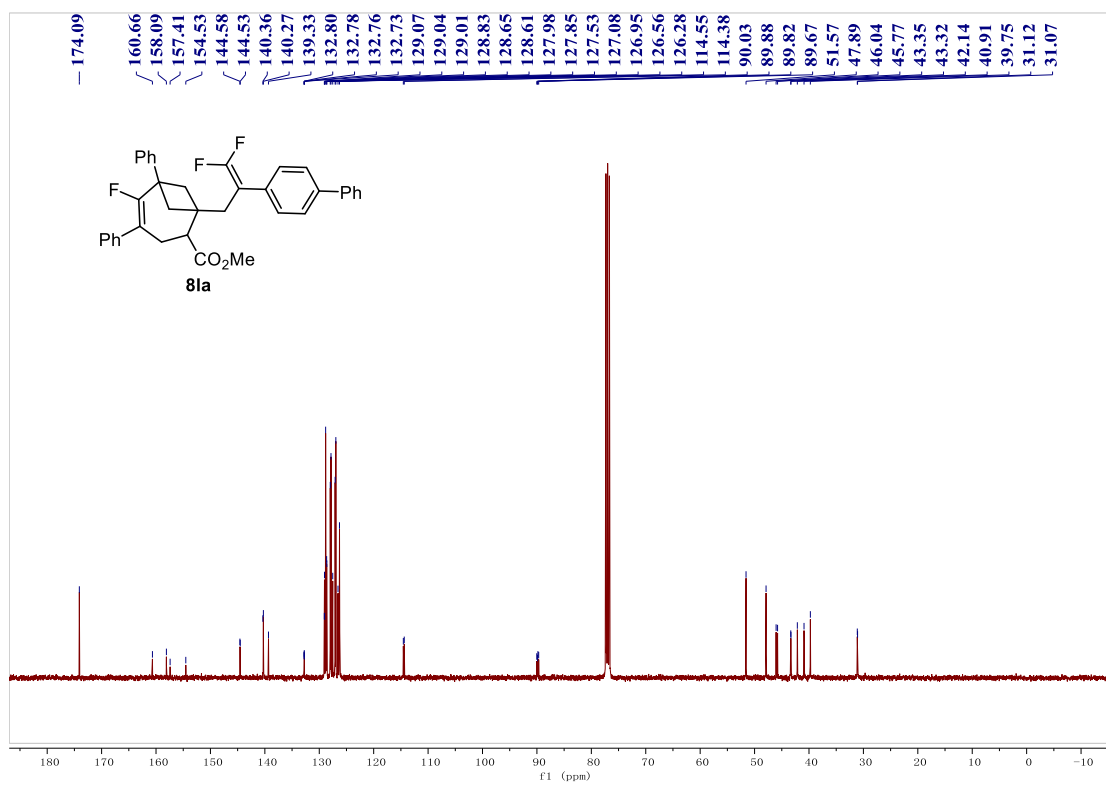

$^1\text{H}$  NMR (400MHz,  $\text{CDCl}_3$ ),  $^{19}\text{F}$  NMR (376 MHz,  $\text{CDCl}_3$ ) and  $^{13}\text{C}$  NMR (100 MHz,  $\text{CDCl}_3$ ) spectra of product **9la**

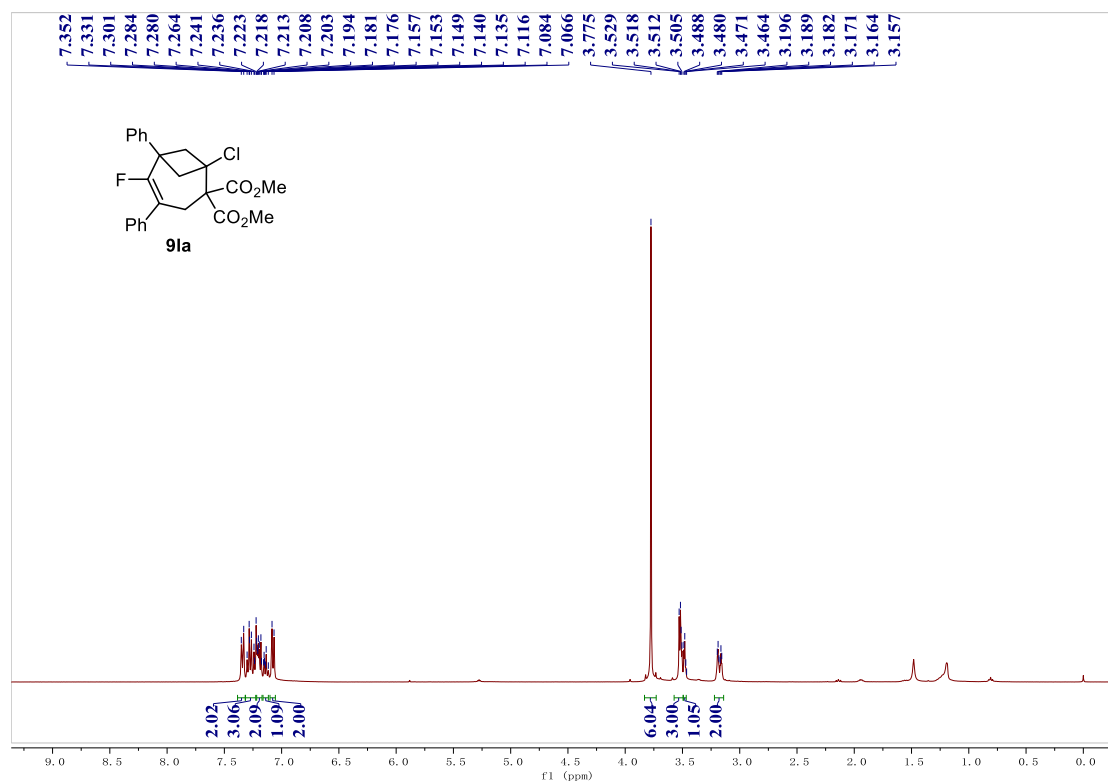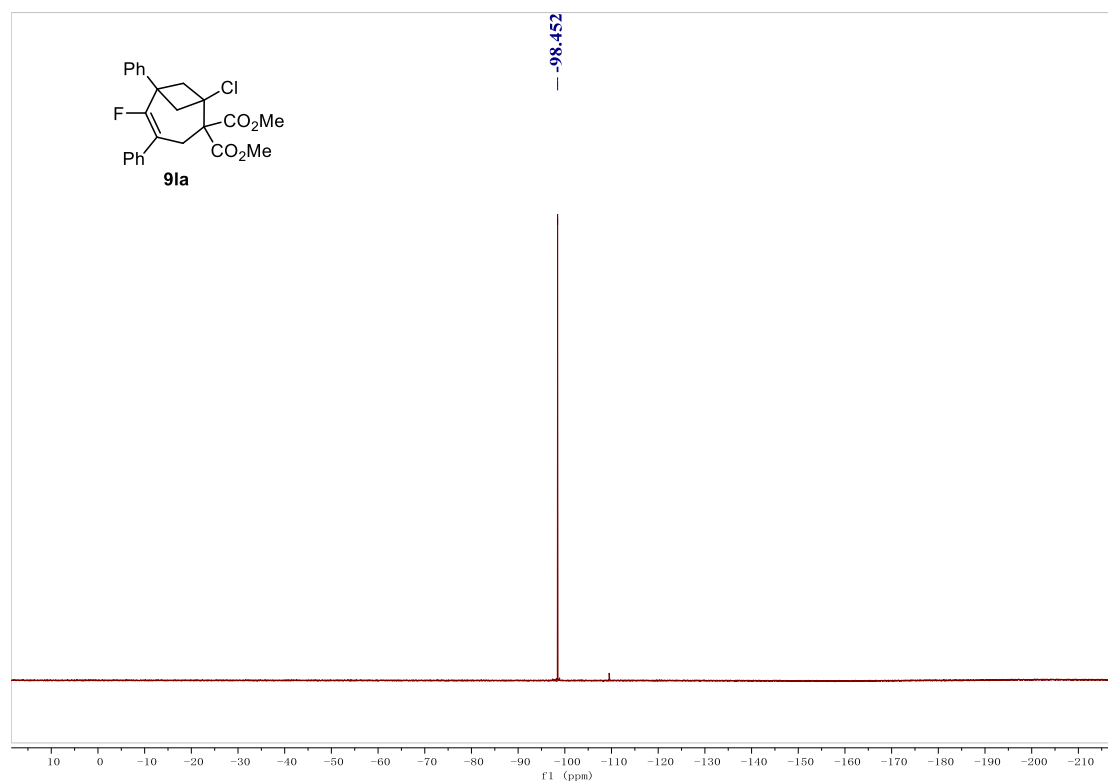

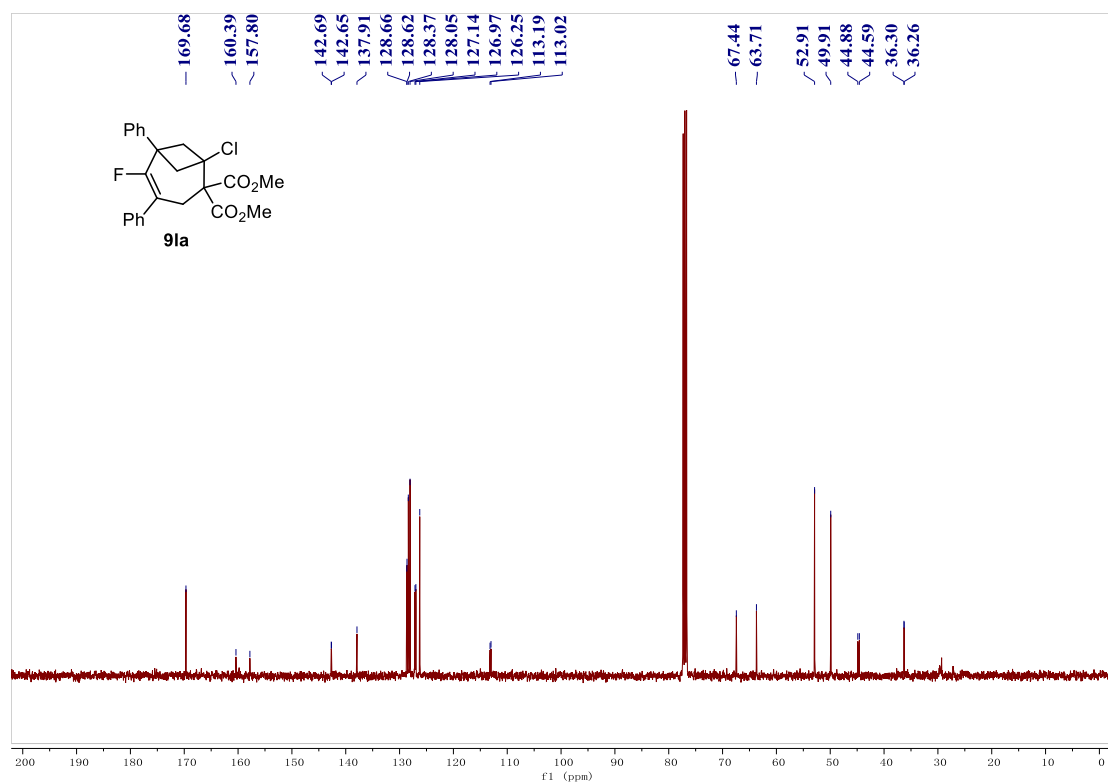

<sup>1</sup>H NMR (400MHz, CDCl<sub>3</sub>), <sup>19</sup>F NMR (376 MHz, CDCl<sub>3</sub>) and <sup>13</sup>C NMR (100 MHz, CDCl<sub>3</sub>) spectra of product **10la**

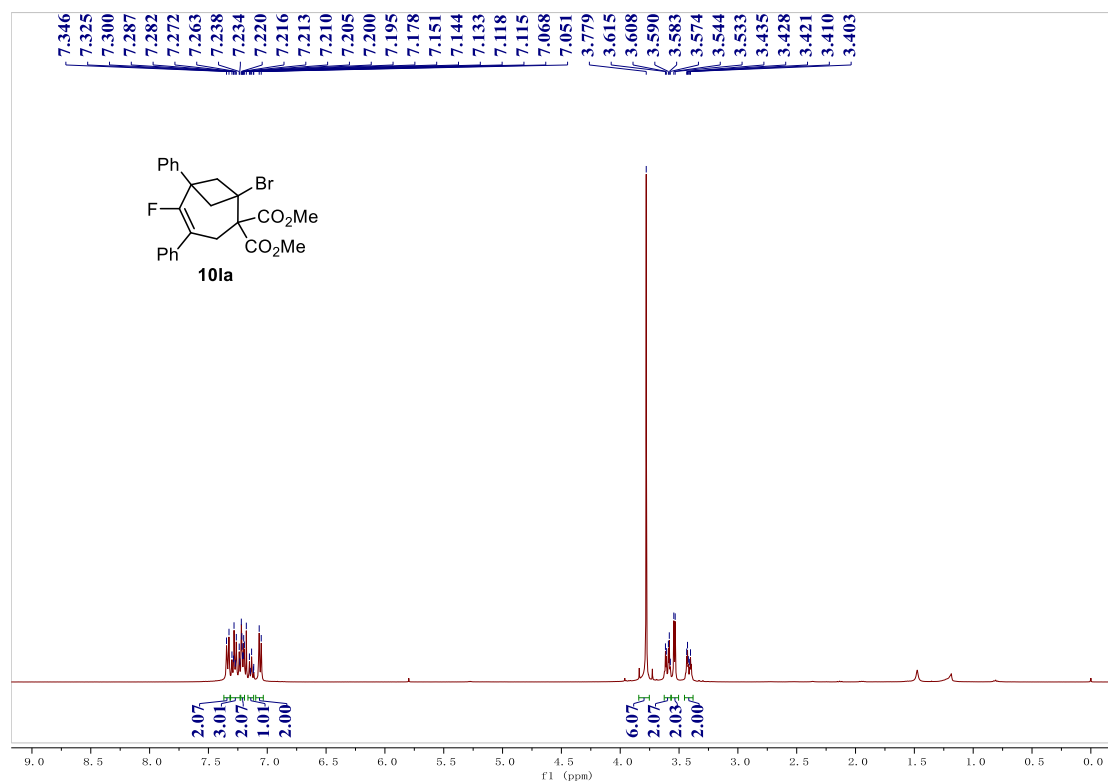

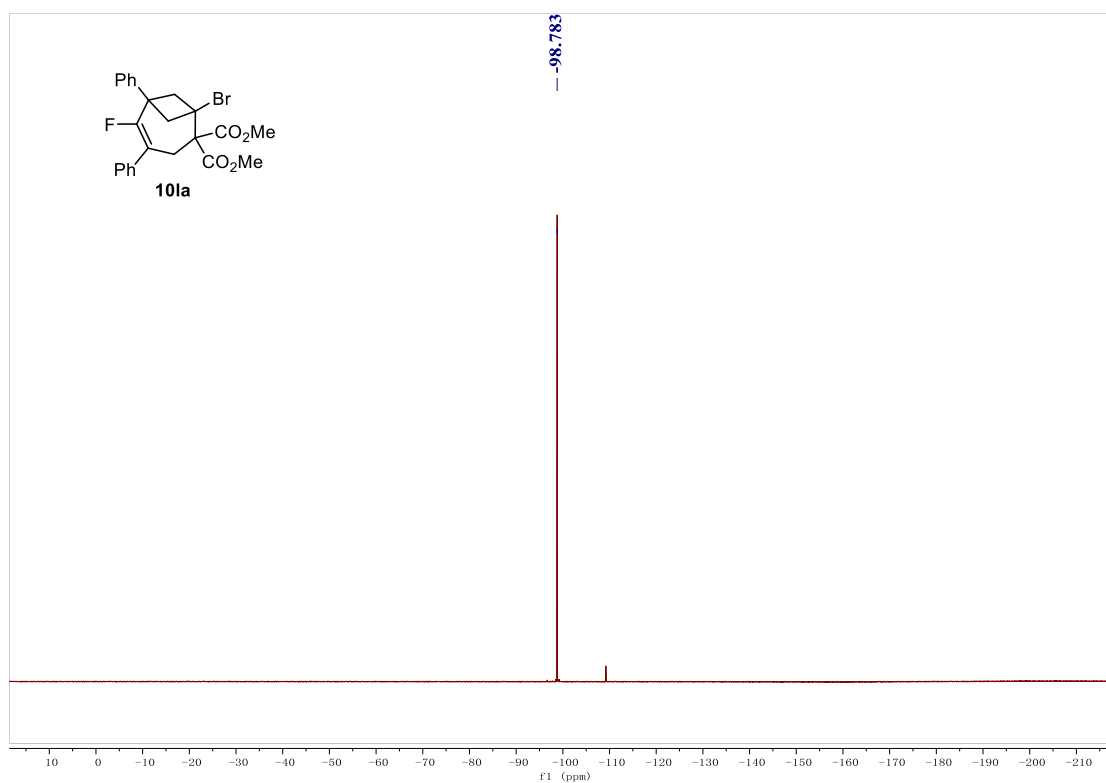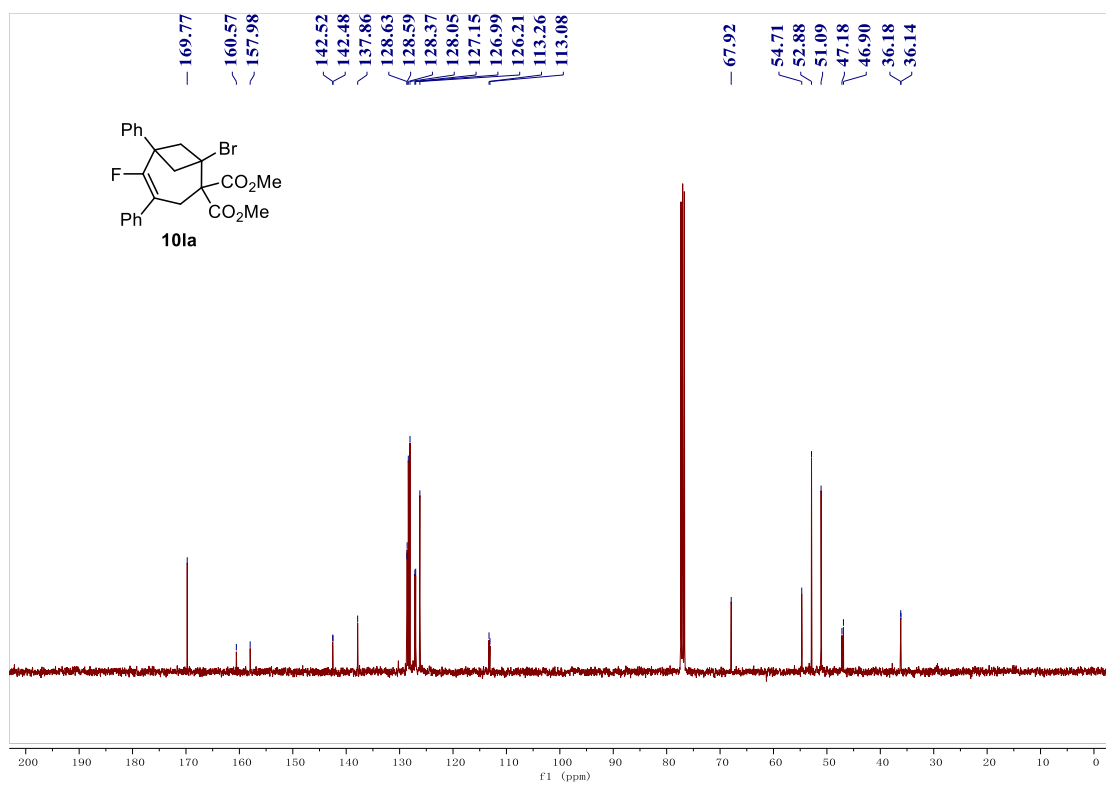

Supplement: SC-OLF-D4SC07243J-s001.pdf [file SC-OLF-D4SC07243J-s001.pdf]
